# Supplementary material for: Cancerouspdomains: comprehensive analysis of cancer type-specific recurrent somatic mutations in proteins and domains
Source: BMC Bioinformatics. 2017 Aug 16;18:370. doi: 10.1186/s12859-017-1779-5 (PMC5559820; doi:10.1186/s12859-017-1779-5)
Supplement: Supplementary file 1 — It contains 27 supplementary tables, Table A1–27 with the data described in the text. (XLSX 1032 kb) [file 12859_2017_1779_MOESM1_ESM.xlsx]

## Sheet: A1
Cancer Type	File Name
ACC	broad.mit.edu__IlluminaGA_curated_DNA_sequencing_level2.maf
	hgsc.bcm.edu__IlluminaGA_automated_DNA_sequencing_level2.maf
	hgsc.bcm.edu__IlluminaGA_curated_DNA_sequencing_level2.maf
	hgsc.bcm.edu__Mixed_curated_DNA_sequencing_level2.maf
BLCA	bcgsc.ca__IlluminaHiSeq_automated_DNA_sequencing_level2.maf
	broad.mit.edu__Illumina_Genome_Analyzer_DNA_Sequencing_level2.maf
	broad.mit.edu__IlluminaGA_automated_DNA_sequencing_level2.maf
	broad.mit.edu__IlluminaGA_curated_DNA_sequencing_level2.maf
BRCA	genome.wustl.edu__Illumina_Genome_Analyzer_DNA_Sequencing_level2.maf
	genome.wustl.edu__IlluminaGA_curated_DNA_sequencing_level2.maf
CHOL	bcgsc.ca__IlluminaHiSeq_automated_DNA_sequencing_level2.maf
	hgsc.bcm.edu__IlluminaGA_automated_DNA_sequencing_level2.maf
	hgsc.bcm.edu__Mixed_curated_DNA_sequencing_level2.maf
	broad.mit.edu__IlluminaGA_automated_DNA_sequencing_level2.maf
	ucsc.edu__IlluminaGA_automated_DNA_sequencing_level2.maf
COAD	hgsc.bcm.edu__Illumina_Genome_Analyzer_DNA_Sequencing_level2.maf
	hgsc.bcm.edu__ABI_SOLiD_DNA_Sequencing_level2.maf
UCSC	bcgsc.ca__IlluminaHiSeq_automated_DNA_sequencing_level2.maf
	hgsc.bcm.edu__IlluminaGA_automated_DNA_sequencing_level2.maf
	broad.mit.edu__IlluminaGA_automated_DNA_sequencing_level2.maf
	ucsc.edu__IlluminaGA_automated_DNA_sequencing_level2.maf
GBM	broad.mit.edu__Illumina_Genome_Analyzer_DNA_Sequencing_level2.maf
HNSC	bcgsc.ca__IlluminaHiSeq_automated_DNA_sequencing_level2.maf
	broad.mit.edu__Illumina_Genome_Analyzer_DNA_Sequencing_level2.maf
	broad.mit.edu__IlluminaGA_automated_DNA_sequencing_level2.maf
	broad.mit.edu__IlluminaGA_curated_DNA_sequencing_level2.maf
KICH	bcgsc.ca__IlluminaHiSeq_automated_DNA_sequencing_level2.maf
	broad.mit.edu__Illumina_Genome_Analyzer_DNA_Sequencing_level2.maf
	hgsc.bcm.edu__Illumina_Genome_Analyzer_DNA_Sequencing_level2.maf
	hgsc.bcm.edu__Mixed_curated_DNA_sequencing_level2.maf
KIRC	hgsc.bcm.edu__Mixed_DNA_Sequencing_level2.maf
	broad.mit.edu__IlluminaGA_automated_DNA_sequencing_level2.maf
KIRP	hgsc.bcm.edu__IlluminaGA_curated_DNA_sequencing_level2.maf
	hgsc.bcm.edu__Mixed_curated_DNA_sequencing_level2.maf
	broad.mit.edu__Illumina_Genome_Analyzer_DNA_Sequencing_level2.maf
	broad.mit.edu__IlluminaGA_automated_DNA_sequencing_level2.maf
	broad.mit.edu__IlluminaGA_curated_DNA_sequencing_level2.maf
	ucsc.edu__IlluminaGA_automated_DNA_sequencing_level2.maf
LGG	hgsc.bcm.edu__IlluminaGA_automated_DNA_sequencing_level2.maf
	broad.mit.edu__Illumina_Genome_Analyzer_DNA_Sequencing_level2.maf
	broad.mit.edu__IlluminaGA_automated_DNA_sequencing_level2.maf
	broad.mit.edu__IlluminaGA_curated_DNA_sequencing_level2.maf
LIHC	bcgsc.ca__IlluminaHiSeq_automated_DNA_sequencing_level2.maf
	hgsc.bcm.edu__IlluminaGA_automated_DNA_sequencing_level2.maf
	hgsc.bcm.edu__Mixed_curated_DNA_sequencing_level2.maf
	ucsc.edu__IlluminaGA_automated_DNA_sequencing_level2.maf
LUAD	broad.mit.edu__Illumina_Genome_Analyzer_DNA_Sequencing_level2.maf
	broad.mit.edu__IlluminaGA_automated_DNA_sequencing_level2.maf
	broad.mit.edu__IlluminaGA_curated_DNA_sequencing_level2.maf
LUSC	broad.mit.edu__Illumina_Genome_Analyzer_DNA_Sequencing_level2.maf
OV	hgsc.bcm.edu__SOLiD_curated_DNA_sequencing_level2.maf
	broad.mit.edu__Illumina_Genome_Analyzer_DNA_Sequencing_level2.maf
	genome.wustl.edu__Illumina_Genome_Analyzer_DNA_Sequencing_level2.maf
PAAD	bcgsc.ca__IlluminaHiSeq_automated_DNA_sequencing_level2.maf
	broad.mit.edu__Illumina_Genome_Analyzer_DNA_Sequencing_level2.maf
	broad.mit.edu__IlluminaGA_automated_DNA_sequencing_level2.maf
	broad.mit.edu__IlluminaGA_curated_DNA_sequencing_level2.maf
	hgsc.bcm.edu__IlluminaGA_automated_DNA_sequencing_level2.maf
	ucsc.edu__IlluminaGA_automated_DNA_sequencing_level2.maf
PCPG	bcgsc.ca__IlluminaHiSeq_automated_DNA_sequencing_level2.maf
	broad.mit.edu__IlluminaGA_automated_DNA_sequencing_level2.maf
	hgsc.bcm.edu__IlluminaGA_automated_DNA_sequencing_level2.maf
	ucsc.edu__IlluminaGA_automated_DNA_sequencing_level2.maf
PRAD	hgsc.bcm.edu__IlluminaGA_automated_DNA_sequencing_level2.maf
	broad.mit.edu__IlluminaGA_automated_DNA_sequencing_level2.maf
	broad.mit.edu__IlluminaGA_curated_DNA_sequencing_level2.maf
READ	hgsc.bcm.edu__ABI_SOLiD_DNA_Sequencing_level2.maf
	hgsc.bcm.edu__Illumina_Genome_Analyzer_DNA_Sequencing_level2.maf
SARC	bcgsc.ca__IlluminaHiSeq_automated_DNA_sequencing_level2.maf
	broad.mit.edu__IlluminaGA_automated_DNA_sequencing_level2.maf
	genome.wustl.edu__IlluminaHiSeq_automated_DNA_sequencing_level2.maf
	ucsc.edu__IlluminaGA_automated_DNA_sequencing_level2.maf
SKCM	broad.mit.edu__Illumina_Genome_Analyzer_DNA_Sequencing_level2.maf
	broad.mit.edu__IlluminaGA_automated_DNA_sequencing_level2.maf
	hgsc.bcm.edu__IlluminaGA_automated_DNA_sequencing_level2.maf
STAD	bcgsc.ca__IlluminaHiSeq_automated_DNA_sequencing_level2.maf
	broad.mit.edu__Illumina_Genome_Analyzer_DNA_Sequencing_level2.maf
	broad.mit.edu__IlluminaGA_automated_DNA_sequencing_level2.maf
	broad.mit.edu__IlluminaGA_curated_DNA_sequencing_level2.maf
	hgsc.bcm.edu__IlluminaGA_automated_DNA_sequencing_level2.maf
	ucsc.edu__IlluminaGA_automated_DNA_sequencing_level2.maf
TGCT	bcgsc.ca__IlluminaHiSeq_automated_DNA_sequencing_level2.maf
	broad.mit.edu__IlluminaGA_automated_DNA_sequencing_level2.maf
	hgsc.bcm.edu__IlluminaGA_automated_DNA_sequencing_level2.maf
	hgsc.bcm.edu__Mixed_curated_DNA_sequencing_level2.maf
	ucsc.edu__IlluminaGA_automated_DNA_sequencing_level2.maf
THCA	bcgsc.ca__IlluminaHiSeq_automated_DNA_sequencing_level2.maf
	broad.mit.edu__Illumina_Genome_Analyzer_DNA_Sequencing_level2.maf
	hgsc.bcm.edu__IlluminaGA_automated_DNA_sequencing_level2.maf
THYM	bcgsc.ca__IlluminaHiSeq_automated_DNA_sequencing_level2.maf
	hgsc.bcm.edu__IlluminaGA_automated_DNA_sequencing_level2.maf
	broad.mit.edu__IlluminaGA_automated_DNA_sequencing_level2.maf
	ucsc.edu__IlluminaGA_automated_DNA_sequencing_level2.maf
UCEC	broad.mit.edu__Illumina_Genome_Analyzer_DNA_Sequencing_level2.maf
	genome.wustl.edu__Illumina_Genome_Analyzer_DNA_Sequencing_level2.maf
UCSC	bcgsc.ca__IlluminaHiSeq_automated_DNA_sequencing_level2.maf
	broad.mit.edu__IlluminaGA_automated_DNA_sequencing_level2.maf
	broad.mit.edu__IlluminaGA_curated_DNA_sequencing_level2.maf
	hgsc.bcm.edu__IlluminaGA_automated_DNA_sequencing_level2.maf
UVM	bcgsc.ca__IlluminaHiSeq_automated_DNA_sequencing_level2.maf
	broad.mit.edu__IlluminaGA_automated_DNA_sequencing_level2.maf
	hgsc.bcm.edu__IlluminaGA_automated_DNA_sequencing_level2.maf
	ucsc.edu__IlluminaGA_automated_DNA_sequencing_level2.maf

## Sheet: A2
Group	Approved Symbols	Gene Type	Length
rRNA	MT-RNR1	non-coding RNA	953
	MT-RNR2		1558
tRNA	MT-TA		68
	MT-TC		65
	MT-TD		67
	MT-TE		68
	MT-TF		70
	MT-TG		67
	MT-TH		68
	MT-TI		68
	MT-TK		69
	MT-TL1		74
	MT-TL2		70
	MT-TM		67
	MT-TN		72
	MT-TP		67
	MT-TQ		71
	MT-TR		64
	MT-TS1		68
	MT-TS2		58
	MT-TT		65
	MT-TV		68
	MT-TW		67
	MT-TY		65
ATP synthase	MT-ATP6	protein-coding gene	681
	MT-ATP8		207
COMPLEX IV	MT-CO1		1542
	MT-CO2		684
	MT-CO3		784
COMPLEX III	MT-CYB		1141
COMPLEX I	MT-ND1		956
	MT-ND2		1042
	MT-ND3		346
	MT-ND4		1378
	MT-ND4L		297
	MT-ND5		1812
	MT-ND6		525

## Sheet: A3
Cancer Type	Total patients	Mutations on Chromosome M	Patients with Mutations on Chromosome M
ACC	92	80	40
BLCA	412	17	11
BRCA	983	305	184
CHOL	36	87	28
COAD	269	0	0
ESCA	182	239	98
GBM	275	0	0
HNSC	524	24	14
KICH	66	128	41
KIRC	451	76	60
KIRP	169	23	16
LGG	460	15	11
LIHC	202	128	86
LUAD	545	106	62
LUSC	178	0	2
OV	230	0	0
PAAD	171	8	7
PCPG	175	0	0
PRAD	425	26	19
READ	116	0	0
SARC	254	136	97
SKCM	75	9	7
STAD	387	51	13
TGCT	144	104	49
THCA	356	45	33
THYM	123	180	61
UCEC	248	86	119
UCS	57	74	39
UVM	80	0	0
Pan Cancer	7685	2040	1121

## Sheet: A4
Gene Name	Chromosome
ABCG1	21
ACTRT3	3
ADH5	4
AFTPH	2
ALX1	12
APLP1	19
ARHGDIB	12
ARMC9	2
ARMCX2	X
ARRB2	17
ASCC3	6
ATP11C	X
AUNIP	1
BBS9	7
BCAT1	12
BCKDHB	6
BMPR1A	10
BOD1	5
BRINP1	9
BUB1B	15
C10orf128	10
C14orf119	14
C14orf166	14
CCDC90B	11
CCL26	7
CCNA2	4
CCNB1	5
CCNG1	5
CCR1	3
CD53	1
CDC123	10
CDC25A	3
CDH6	5
CENPE	4
CENPH	5
CENPI	X
CHEK2	22
CMBL	5
CPSF3	2
CTSH	15
CTSS	1
DACT1	14
DCUN1D5	11
DDX1	2
DEPDC1B	5
DHX15	4
DIAPH3	13
DIMT1	5
DLGAP5	14
DNMT3B	20
DPH3	3
DTD1	20
EIF2AK4	15
EIF2B3	1
ERCC2	19
FAM118B	11
FANCB	X
FBXO22	15
FGF2	4
FST	5
FYB	5
FZD2	17
GARS	7
GBE1	3
GDF3	12
GIMAP1	7
GIMAP5	7
GIMAP6	7
GIMAP7	7
GIMAP8	7
GNL2	1
GPR176	15
GPX8	5
HAS2	8
HAT1	2
HAUS1	18
HAUS6	9
HDAC2	6
HDX	X
HESX1	3
HIST1H4C	6
HLA-DMB	6
HLA-DPA1	6
HLA-DQA1	6
HLA-DRB5	6
HMGA2	12
HTR7	10
IARS	9
ICMT	1
IGF2BP1	17
IL10RA	11
INHBE	12
IPO5	13
JUNB	19
KDELC1	13
KIAA0020	9
KIF11	10
KIF20A	5
KIF23	15
KIF7	15
KMT2C	7
LIN28B	6
MCM10	10
MCM4	8
MCM6	2
MED20	6
MIS18A	21
MLLT6	17
MMADHC	2
MRPL3	3
MS4A7	11
MSH2	2
MSH6	2
MTHFD1L	6
MTHFD2	2
MXI1	10
MYCN	2
NDC80	18
NMNAT2	1
NPR3	5
NREP	5
NUSAP1	15
ORC1	1
OSTC	4
PAICS	4
PDE4C	19
PDHB	3
PECAM1	17
PFAS	17
PILRB	7
PLAA	9
PLRG1	4
POLE2	14
PRIM1	12
PRR34	22
PTPRC	1
RAB3B	1
RAD1	5
RARS	5
RARS2	6
RCSD1	1
RGCC	13
RIOK2	5
ROR1	1
RPF2	6
RRAS2	11
RSAD2	2
SAMM50	22
SAT1	X
SEC11A	15
SKIV2L2	5
SKP2	5
SLC24A1	15
SLC25A3	12
SMARCC2	12
SMIM20	4
SNRPD3	22
SNX8	7
SOHLH2	13
SPDL1	5
TARDBP	1
TBC1D16	17
TBCE	1
TET1	10
TEX10	9
TM2D2	8
TNFSF10	3
TRIM24	7
TRNT1	3
TRPC4	13
TSHZ2	20
UBE2K	4
UBXN2A	2
UGGT2	13
UTP6	17
XK	X
XK	X
XPOT	12
XRCC5	2
XXYLT1	3
ZBTB20	3
ZNF788	19

## Sheet: A5
Gene Name	Chromosome
ALKBH2	12
ALKBH3	11
APEX1	14
APEX2	X
APLF	2
APTX	9
ATM	11
ATRIP	3
BLM	15
BRCA1	17
BRCA2	13
BRIP1	17
C19ORF40	19
C1ORF86	1
CCNH	5
CDK7	5
CETN2	X
CHEK1	11
CHEK2	22
CLK2	1
CNOT7	8
DCLRE1A	10
DCLRE1B	1
DCLRE1C	10
DDB1	11
DDB2	11
DMC1	22
DUT	15
EME1	17
EME2	16
ENDOV	17
ERCC1	19
ERCC2	19
ERCC3	2
ERCC4	16
ERCC5	13
ERCC6	10
ERCC8	5
EXO1	1
FAN1	15
FANCA	16
FANCB	X
FANCC	9
FANCD2	3
FANCE	6
FANCF	11
FANCG	9
FANCI	15
FANCL	2
FANCM	14
FEN1	11
GEN1	2
GTF2H1	11
GTF2H2	5
GTF2H3	12
GTF2H4	6
GTF2H5	6
H2AFX	11
HELQ	4
HLTF	3
HUS1	7
INSL6	9
LIG1	19
LIG3	17
LIG4	13
MAD2L2	1
MBD4	3
MDC1	6
MGMT	10
MLH1	3
MLH3	14
MMS19	10
MNAT1	14
MPG	16
MPLKIP	7
MRE11A	11
MSH2	2
MSH3	5
MSH4	1
MSH5	6
MSH6	2
MUS81	11
MUTYH	1
NABP2	12
NBN	8
NEIL1	15
NEIL2	8
NEIL3	4
NHEJ1	2
NTHL1	16
NUDT1	7
OGG1	3
PALB2	16
PARP1	1
PARP2	14
PARP3	3
PCNA	20
PER1	17
PMS1	2
PMS2	7
PNKP	19
POLB	8
POLD1	19
POLE	12
POLG	15
POLH	6
POLI	18
POLK	5
POLL	10
POLM	7
POLN	4
PRKDC	8
PRPF19	11
RAD17	5
RAD18	3
RAD23A	19
RAD23B	9
RAD50	5
RAD51	15
RAD51B	14
RAD51C	17
RAD51D	17
RAD52	12
RAD54B	8
RAD54L	1
RAD9A	11
RBBP8	18
RDM1	17
RECQL	12
RECQL4	8
RECQL5	17
REV1	2
REV3L	6
RNF168	3
RNF4	4
RNF8	6
RPA1	17
RPA2	1
RPA3	7
RPA4	X
RRM2B	8
SERPINA2	14
SETMAR	3
SHFM1	7
SHPRH	6
SLX1B	16
SLX4	16
SMUG1	12
SPO11	20
SPRTN	1
TDG	12
TDP1	14
TDP2	6
TOPBP1	3
TP53	17
TP53BP1	15
TREX1	3
TREX2	X
UBE2A	X
UBE2B	5
UBE2N	12
UBE2V2	8
UNG	12
UVSSA	4
WRN	8
XAB2	19
XPA	9
XPC	3
XRCC1	19
XRCC2	7
XRCC3	14
XRCC4	5
XRCC5	2
XRCC6	22

## Sheet: A6
Cancer Type	Stem Cell Genes with Pfam Candidate Domains
ACC	CDH6
BLCA	ERCC2	RAB3B	CCR1	HTR7	CDH6	GPR176	TRPC4
BRCA	CCR1	HTR7
CHOL	TRIM24	ADH5	NREP
GBM	BRINP1	PTPRC	NPR3	RAB3B	CCR1	HTR7	BMPR1A	CDH6	RRAS2	ROR1	GIMAP6	GIMAP8	GIMAP7	GIMAP1	GIMAP5	TRPC4	PILRB
KICH	CDH6	ZNF788	ZBTB20	TRPC4
KIRC	ERCC2	FBXO22
KIRP	ERCC2	RAB3B	CDH6	RRAS2	KMT2C
LUAD	BRINP1	NPR3	CDH6	KMT2C
LUSC	HLA-DQA1
PAAD	PTPRC	NPR3	CCR1	HTR7	CDH6	GPR176
PCPG	RAB3B	ROR1	TARDBP	BBS9	KMT2C	IGF2BP1
PRAD	RRAS2
READ	CDH6
SARC	ERCC2	RAB3B	CCR1	HTR7	RRAS2
STAD	PTPRC	NPR3	CDH6	ROR1	GIMAP6	GIMAP8	GIMAP7	GIMAP1	GIMAP5	TRPC4	PILRB
TGCT	PTPRC	FGF2	NPR3	CCR1	HTR7	MSH2	MSH6	CDH6	ROR1	GPR176	HDX	TRPC4	HESX1
THCA	RRAS2	C10orf128
THYM	ROR1
UVM	HLA-DRB5	KMT2C
pan-cancer	BRINP1	HLA-DQA1	NPR3	HLA-DPA1	HLA-DMB	CCR1	HTR7	CDH6	ROR1	GPR176	ALX1	HLA-DRB5	GIMAP6	HDX	GIMAP8	KMT2C	GIMAP7	GIMAP1	HAS2	GIMAP5	TRPC4

## Sheet: A7
Cancer Type	Stem Cell Genes with CATH Candidate Domains
BLCA	CCNA2	CCNB1	CHEK2	TRIM24	HLA-DPA1	HLA-DRB5	IL10RA	KDELC1	TARDBP	RAB3B	RRAS2
BRCA	CHEK2	HLA-DPA1	HLA-DRB5	IL10RA	KDELC1
CHOL	BMPR1A	HLA-DPA1	HLA-DRB5	IL10RA	KDELC1
COAD	CHEK2	HLA-DPA1	HLA-DRB5	IL10RA	KDELC1
ESCA	CHEK2
GBM	CCNA2	CCNB1
HNSC	CHEK2	HLA-DPA1	HLA-DRB5	IL10RA	KDELC1
KIRC	SKP2	TRIM24
KIRP	CHEK2	DPH3
LIHC	CCNA2	CCNB1	CHEK2	HLA-DPA1	HLA-DRB5	IL10RA	KDELC1
LUAD	CHEK2	HLA-DPA1	HLA-DRB5	IL10RA	KDELC1	PTPRC
LUSC	HLA-DPA1	HLA-DRB5	IL10RA	KDELC1
PAAD	CHEK2	TARDBP
PCPG	HLA-DPA1	HLA-DRB5	IL10RA	KDELC1	RAB3B	RRAS2
PRAD	CHEK2
READ	CHEK2
SARC	CCNA2	CCNB1	CHEK2	HLA-DPA1	HLA-DRB5	IL10RA	KDELC1
SKCM	CHEK2	HLA-DPA1	HLA-DRB5	IL10RA	KDELC1
STAD	CHEK2	SKP2	TRIM24	HLA-DPA1	HLA-DRB5	IL10RA	KDELC1	PTPRC
TGCT	HLA-DPA1	HLA-DRB5	IL10RA	KDELC1
THCA	CHEK2	RAB3B	RRAS2
THYM	CHEK2	CTSS
UCEC	TRNT1	CCNA2	CCNB1	CHEK2	SKP2	HLA-DPA1	HLA-DRB5	IL10RA	KDELC1
UVM	LIN28B
pan-cancer	PDE4C	CCNA2	CCNB1	CHEK2	DNMT3B	SKP2	TRIM24	BMPR1A	HLA-DPA1	HLA-DRB5	IL10RA	KDELC1	FGF2	TARDBP	RAB3B	RRAS2	PTPRC

## Sheet: A8
Cancer Type	DNA repair genes with CATH Candidate Domains
ACC	TP53
BLCA	RPA2	WRN	MGMT	CCNH	CLK2	CDK7	CHEK1	CHEK2	TP53	RAD51	DMC1
BRCA	CLK2	CDK7	CHEK1	CHEK2	TP53
CHOL	TP53
COAD	NHEJ1	CLK2	CDK7	CHEK1	CHEK2	TP53
ESCA	CLK2	CDK7	CHEK1	CHEK2	TP53
GBM	CCNH	TP53
HNSC	CLK2	CDK7	CHEK1	CHEK2	TP53
KICH	TP53
KIRC	SETMAR	TP53
KIRP	MUTYH	OGG1	CLK2	CDK7	CHEK1	CHEK2	TP53
LGG	TP53
LIHC	CCNH	CLK2	CDK7	CHEK1	CHEK2	TP53
LUAD	CLK2	CDK7	CHEK1	CHEK2	TP53
LUSC	TP53
OV	TP53
PAAD	CLK2	CDK7	CHEK1	CHEK2	TP53	REV1	TOPBP1	MDC1	POLM	POLL	LIG4	TP53BP1	BRCA1	LIG3	XRCC1
PCPG	LIG1	TDG	UNG	RAD51	DMC1
PRAD	CLK2	CDK7	CHEK1	CHEK2	TP53	MAD2L2
READ	NHEJ1	CLK2	CDK7	CHEK1	CHEK2	TP53
SARC	CCNH	CLK2	CDK7	CHEK1	CHEK2	TP53
SKCM	CLK2	CDK7	CHEK1	CHEK2	TP53
STAD	CLK2	CDK7	CHEK1	CHEK2	TP53
THCA	CLK2	CDK7	CHEK1	CHEK2	TDG	UNG	RAD51	DMC1
THYM	CLK2	CDK7	CHEK1	CHEK2	TP53
UCEC	CCNH	CLK2	CDK7	CHEK1	CHEK2	TP53
UCS	TP53
UVM	RPA2	RPA3	RPA1	LIG1	TDG	UNG
pan-cancer	RPA2	WRN	MGMT	NHEJ1	CCNH	CLK2	CDK7	CHEK1	CHEK2	SETMAR	XRCC1	TP53	TDG	UNG	REV1	TOPBP1	MDC1	POLM	POLL	LIG4	TP53BP1	BRCA1	LIG3	RAD51	DMC1

## Sheet: A9
Cancer Type	DNA repair genes with Pfam Candidate Domains
ACC	TP53	H2AFX
BLCA	TP53	ERCC2	LIG4
BRCA	TP53
CHOL	TP53	RPA1	FANCE
COAD	PRPF19
ESCA	TP53
GBM	TP53	H2AFX
HNSC	TP53
KICH	TP53
KIRC	TP53	ERCC2	UVSSA
KIRP	TP53	H2AFX	ERCC2	BRIP1
LGG	TP53
LIHC	TP53
LUAD	TP53	H2AFX
LUSC	TP53
OV	TP53
PAAD	TP53
PCPG	EME2	TP53	PARP1	FANCM	RDM1	ERCC4	MUS81	PARP3
PRAD	TDG	FANCD2
READ	TP53
SARC	TP53	ERCC2
SKCM	TP53
STAD	TP53
TGCT	MSH4	TP53	MSH3	MSH2	MSH6	NEIL1
THCA	FANCA
THYM	TDG	SMUG1
UCS	TP53	SPRTN
UVM	BRCA2	TDG	FANCD2
pan-cancer	H2AFX

## Sheet: A10
CATH ID	Repitition on whole Proteome	Totlal Length
1.10.10.10	44	7159
1.10.10.41	1	592
1.10.10.430	1	382
1.10.10.440	5	395
1.10.10.490	1	81
1.10.10.520	2	1071
1.10.10.540	2	430
1.10.10.570	1	176
1.10.10.60	26	2861
1.10.10.750	1	316
1.10.100.10	3	158
1.10.1000.11	4	803
1.10.101.10	2	846
1.10.1040.10	6	2083
1.10.1070.11	3	2639
1.10.1080.10	1	474
1.10.1170.10	10	1145
1.10.12.10	9	2339
1.10.1200.10	2	186
1.10.1300.10	13	4328
1.10.132.10	1	592
1.10.135.10	4	1520
1.10.1370.10	1	674
1.10.1380.10	2	1366
1.10.1390.10	1	557
1.10.1410.20	1	347
1.10.1440.10	1	79
1.10.1450.10	1	89
1.10.1470.20	1	312
1.10.1490.10	1	107
1.10.150.110	2	669
1.10.150.190	1	302
1.10.150.20	7	1693
1.10.150.210	1	225
1.10.150.240	1	555
1.10.150.300	1	396
1.10.150.40	1	89
1.10.150.50	23	1991
1.10.150.60	5	573
1.10.150.80	3	310
1.10.1520.10	1	193
1.10.1540.10	2	828
1.10.1600.10	2	1174
1.10.167.10	14	2520
1.10.1670.10	2	632
1.10.1820.10	1	215
1.10.1900.10	2	200
1.10.196.10	8	1118
1.10.20.10	13	1413
1.10.220.10	7	2373
1.10.220.20	4	803
1.10.220.60	1	59
1.10.225.10	4	317
1.10.238.10	45	7629
1.10.240.10	3	1179
1.10.245.10	2	223
1.10.246.10	2	1043
1.10.246.20	1	74
1.10.246.60	1	80
1.10.260.30	1	119
1.10.260.40	9	1178
1.10.275.10	1	464
1.10.286.10	1	196
1.10.287.10	4	898
1.10.287.100	1	57
1.10.287.1010	1	349
1.10.287.1070	1	47
1.10.287.1090	1	60
1.10.287.110	6	627
1.10.287.1130	1	68
1.10.287.130	1	347
1.10.287.140	1	505
1.10.287.160	2	164
1.10.287.190	1	108
1.10.287.440	1	592
1.10.287.450	2	358
1.10.287.520	1	205
1.10.287.550	1	562
1.10.287.570	1	42
1.10.287.600	1	451
1.10.287.630	2	422
1.10.287.650	3	173
1.10.287.700	1	140
1.10.287.80	1	730
1.10.287.810	2	179
1.10.287.990	1	198
1.10.288.10	1	341
1.10.30.10	10	790
1.10.300.10	1	436
1.10.3090.10	1	405
1.10.3210.10	1	204
1.10.3260.10	1	687
1.10.3270.10	1	463
1.10.3380.10	1	329
1.10.340.30	3	787
1.10.3430.10	1	478
1.10.3520.10	1	209
1.10.3630.10	1	247
1.10.3730.10	1	300
1.10.390.10	1	610
1.10.40.30	1	464
1.10.40.40	2	390
1.10.400.10	2	680
1.10.4020.10	3	279
1.10.405.10	2	1047
1.10.4080.10	2	703
1.10.418.10	27	4602
1.10.437.10	8	1371
1.10.472.10	11	3054
1.10.490.10	11	1649
1.10.506.10	1	334
1.10.510.10	180	60398
1.10.530.10	2	253
1.10.530.40	2	198
1.10.532.10	1	683
1.10.533.10	21	2408
1.10.540.10	8	3351
1.10.555.10	11	2816
1.10.565.10	33	8941
1.10.600.10	3	993
1.10.620.20	2	681
1.10.630.10	17	8016
1.10.640.10	1	467
1.10.720.30	3	735
1.10.720.40	2	221
1.10.720.50	2	303
1.10.750.10	1	160
1.10.760.10	1	104
1.10.790.10	1	129
1.10.8.10	13	2064
1.10.8.20	2	594
1.10.8.270	1	316
1.10.8.60	5	1234
1.10.800.10	3	987
1.10.840.10	2	1119
1.10.870.10	1	75
1.10.880.10	1	80
1.10.930.10	2	510
1.10.950.10	3	196
1.20.1000.10	1	592
1.20.1020.10	3	307
1.20.1050.10	19	4114
1.20.1050.20	1	710
1.20.1050.40	1	674
1.20.1070.10	4	1121
1.20.1080.10	3	756
1.20.1150.12	1	228
1.20.120.150	1	100
1.20.120.180	1	139
1.20.120.20	1	191
1.20.120.230	3	793
1.20.120.310	1	125
1.20.120.330	5	700
1.20.120.550	3	463
1.20.120.560	1	698
1.20.1200.10	1	195
1.20.1250.10	24	3699
1.20.1260.10	3	539
1.20.1270.60	6	1432
1.20.1280.20	1	206
1.20.1280.50	2	484
1.20.1310.10	2	1142
1.20.1340.10	2	956
1.20.1390.10	3	297
1.20.140.10	8	3351
1.20.140.20	4	1589
1.20.140.30	1	184
1.20.140.50	1	698
1.20.1410.10	1	201
1.20.142.10	3	1050
1.20.1440.80	1	226
1.20.1480.20	1	101
1.20.190.20	7	1699
1.20.200.10	1	464
1.20.245.10	1	492
1.20.5.10	1	54
1.20.5.100	3	588
1.20.5.1000	1	71
1.20.5.110	3	196
1.20.5.1160	1	45
1.20.5.1180	1	83
1.20.5.120	1	60
1.20.5.1200	1	278
1.20.5.1230	1	200
1.20.5.170	14	1622
1.20.5.20	1	46
1.20.5.290	1	52
1.20.5.320	1	483
1.20.5.340	1	78
1.20.5.350	2	286
1.20.5.360	1	38
1.20.5.370	1	213
1.20.5.390	1	86
1.20.5.450	1	345
1.20.5.460	1	320
1.20.5.470	1	412
1.20.5.480	1	41
1.20.5.50	5	970
1.20.5.510	1	41
1.20.5.540	1	162
1.20.5.630	1	47
1.20.5.670	1	83
1.20.5.690	1	44
1.20.5.70	1	40
1.20.5.730	2	143
1.20.5.780	1	72
1.20.5.900	1	62
1.20.5.930	1	41
1.20.58.120	3	320
1.20.58.160	3	396
1.20.58.190	1	228
1.20.58.200	1	228
1.20.58.280	5	446
1.20.58.420	1	102
1.20.58.60	6	1237
1.20.58.70	1	184
1.20.58.90	2	215
1.20.80.10	8	1802
1.20.81.10	1	82
1.20.82.10	2	521
1.20.870.10	1	852
1.20.890.10	1	41
1.20.90.10	2	247
1.20.900.10	10	3880
1.20.91.20	1	73
1.20.910.10	2	497
1.20.920.10	32	4283
1.20.930.20	1	410
1.20.930.40	3	2053
1.20.970.10	1	471
1.25.10.10	13	7333
1.25.40.10	15	3108
1.25.40.120	1	379
1.25.40.180	7	2340
1.25.40.20	19	4012
1.25.40.200	1	170
1.25.40.210	2	446
1.25.40.240	1	145
1.25.40.250	1	218
1.25.40.280	1	698
1.25.40.70	3	2639
1.25.40.90	11	1715
1.50.10.10	1	528
1.50.10.20	4	1844
2.10.10.10	3	1216
2.10.110.10	9	720
2.10.160.10	1	53
2.10.220.10	6	3427
2.10.25.10	30	4788
2.10.310.10	2	82
2.10.50.10	3	416
2.10.60.10	8	1039
2.10.70.10	23	4515
2.10.80.10	1	89
2.10.90.10	29	3525
2.100.10.30	2	295
2.110.10.10	5	1837
2.120.10.10	1	380
2.120.10.30	1	699
2.120.10.80	3	887
2.130.10.10	11	4682
2.130.10.110	1	364
2.130.10.120	1	709
2.130.10.130	3	2037
2.130.10.30	2	784
2.140.10.30	3	2180
2.160.10.10	1	190
2.160.20.70	1	157
2.170.11.10	1	592
2.170.150.10	2	295
2.170.210.10	2	446
2.170.240.10	1	229
2.170.260.10	2	268
2.170.270.10	13	2935
2.170.300.10	1	423
2.170.8.10	1	622
2.20.100.10	1	114
2.20.110.10	1	293
2.20.160.10	1	90
2.20.210.10	1	353
2.20.25.10	3	289
2.20.25.20	1	215
2.20.28.10	1	75
2.20.60.10	1	59
2.20.70.10	12	857
2.30.110.10	2	433
2.30.130.10	1	180
2.30.140.10	2	664
2.30.18.10	2	182
2.30.180.10	1	132
2.30.280.10	2	466
2.30.29.30	67	12971
2.30.29.40	2	828
2.30.30.100	3	218
2.30.30.140	11	1082
2.30.30.160	12	2823
2.30.30.190	6	611
2.30.30.30	4	518
2.30.30.380	1	765
2.30.30.40	64	6379
2.30.31.10	1	65
2.30.39.10	17	6438
2.30.40.10	1	478
2.30.42.10	74	8245
2.30.90.10	1	43
2.40.10.10	27	7506
2.40.10.230	1	96
2.40.100.10	10	1724
2.40.110.10	8	3351
2.40.128.20	21	3256
2.40.128.80	1	439
2.40.15.10	2	220
2.40.20.10	5	841
2.40.250.10	1	138
2.40.290.10	3	1369
2.40.30.10	2	474
2.40.30.110	1	375
2.40.30.30	1	148
2.40.320.10	1	230
2.40.33.10	2	1072
2.40.37.10	1	461
2.40.40.20	1	481
2.40.460.10	1	758
2.40.50.100	6	405
2.40.50.120	6	1119
2.40.50.140	30	5655
2.40.50.170	2	111
2.40.50.210	1	294
2.40.50.40	43	3129
2.40.50.90	1	261
2.40.70.10	9	2255
2.60.120.10	6	1480
2.60.120.200	20	3530
2.60.120.260	15	3851
2.60.120.290	6	1771
2.60.120.340	2	223
2.60.120.380	2	829
2.60.120.40	16	2495
2.60.120.590	1	206
2.60.120.680	1	403
2.60.20.10	8	1312
2.60.200.10	6	1420
2.60.200.20	11	1608
2.60.210.10	6	1224
2.60.34.10	1	159
2.60.40.10	217	42878
2.60.40.1110	1	346
2.60.40.1120	2	862
2.60.40.1150	1	238
2.60.40.1170	1	272
2.60.40.1180	7	3272
2.60.40.1230	4	569
2.60.40.1260	3	379
2.60.40.1450	1	427
2.60.40.1460	3	2538
2.60.40.1480	1	267
2.60.40.1490	1	172
2.60.40.150	18	5480
2.60.40.1510	3	2607
2.60.40.1530	2	1915
2.60.40.1670	5	3802
2.60.40.1700	1	663
2.60.40.1730	2	1511
2.60.40.180	1	127
2.60.40.200	3	529
2.60.40.320	1	613
2.60.40.340	6	1666
2.60.40.360	4	470
2.60.40.420	5	1618
2.60.40.60	6	895
2.60.40.630	1	710
2.60.40.670	4	379
2.60.40.690	2	481
2.60.40.720	4	800
2.60.40.770	1	142
2.60.40.780	1	160
2.60.40.790	5	587
2.60.40.820	2	390
2.60.60.20	2	902
2.70.130.10	1	292
2.70.160.11	3	1044
2.70.220.10	1	162
2.70.40.10	1	159
2.70.50.30	2	381
2.70.50.40	2	335
2.70.98.10	1	342
2.70.98.20	2	1494
2.80.10.50	18	4236
3.10.100.10	27	3869
3.10.110.10	29	4702
3.10.120.10	3	277
3.10.129.10	5	1122
3.10.130.10	4	519
3.10.180.10	4	825
3.10.196.10	1	341
3.10.20.10	1	90
3.10.20.230	3	307
3.10.20.260	1	431
3.10.20.30	4	701
3.10.20.90	66	10382
3.10.200.10	8	2132
3.10.25.10	1	307
3.10.250.10	3	587
3.10.260.20	3	303
3.10.280.10	1	209
3.10.290.20	1	640
3.10.300.10	1	219
3.10.320.10	11	2041
3.10.330.10	1	481
3.10.360.10	4	172
3.10.390.10	3	283
3.10.400.10	1	624
3.10.450.10	6	791
3.10.450.110	2	790
3.10.450.30	1	70
3.10.450.40	2	1494
3.10.450.50	5	797
3.10.490.10	2	341
3.10.50.10	4	1480
3.10.50.40	10	1887
3.10.580.10	2	299
3.10.590.10	1	167
3.10.600.10	1	697
3.10.620.10	1	204
3.10.660.10	1	81
3.15.10.10	1	456
3.15.20.10	1	456
3.20.10.10	2	751
3.20.20.10	1	461
3.20.20.100	11	3549
3.20.20.120	2	873
3.20.20.140	8	3268
3.20.20.210	1	367
3.20.20.240	1	739
3.20.20.330	1	406
3.20.20.380	1	273
3.20.20.60	2	1072
3.20.20.70	19	7071
3.20.20.80	14	6484
3.20.90.10	2	526
3.30.1010.10	3	2639
3.30.1020.10	1	224
3.30.1050.10	2	241
3.30.110.30	1	510
3.30.1110.10	1	341
3.30.1120.10	4	2039
3.30.1120.30	1	259
3.30.1130.10	1	196
3.30.1250.10	1	250
3.30.1330.10	1	392
3.30.1330.20	1	451
3.30.1330.30	5	950
3.30.1330.40	1	136
3.30.1360.120	1	375
3.30.1360.30	1	605
3.30.1370.10	16	1610
3.30.1370.50	2	157
3.30.1380.10	3	521
3.30.1380.20	3	497
3.30.1490.100	3	1383
3.30.1490.120	1	172
3.30.1490.140	1	173
3.30.1490.20	4	1426
3.30.1490.40	1	80
3.30.1490.50	1	474
3.30.1490.70	1	687
3.30.1490.80	1	474
3.30.1520.10	10	1258
3.30.1560.10	1	144
3.30.160.110	1	362
3.30.160.20	8	758
3.30.160.60	25	1345
3.30.160.70	1	207
3.30.1600.10	1	323
3.30.1610.10	1	193
3.30.1680.10	3	1899
3.30.170.10	2	148
3.30.1740.10	2	238
3.30.200.20	177	59450
3.30.210.10	2	669
3.30.2160.10	2	730
3.30.2230.10	1	223
3.30.2240.10	1	300
3.30.2260.10	1	104
3.30.2280.10	1	139
3.30.230.10	7	2617
3.30.230.70	2	479
3.30.2410.10	2	730
3.30.30.30	4	1537
3.30.300.10	2	775
3.30.300.20	1	116
3.30.300.30	1	546
3.30.310.10	3	689
3.30.310.40	1	345
3.30.360.10	4	1478
3.30.360.50	1	67
3.30.379.10	2	1022
3.30.390.10	2	873
3.30.390.30	4	1962
3.30.40.10	52	5384
3.30.420.10	7	1569
3.30.420.40	10	4944
3.30.420.60	1	437
3.30.428.10	3	610
3.30.429.10	2	232
3.30.450.20	6	700
3.30.450.30	4	495
3.30.450.40	1	182
3.30.450.50	2	313
3.30.450.60	1	149
3.30.46.10	1	294
3.30.460.10	4	1421
3.30.470.10	2	751
3.30.470.20	4	1805
3.30.470.30	2	826
3.30.479.10	1	139
3.30.497.10	16	6039
3.30.50.10	12	1766
3.30.500.10	16	4264
3.30.505.10	39	8657
3.30.530.20	7	1483
3.30.540.10	5	1528
3.30.56.30	1	120
3.30.565.10	8	2813
3.30.572.10	1	313
3.30.590.10	4	1520
3.30.60.20	10	1532
3.30.60.30	9	1114
3.30.60.60	3	857
3.30.63.10	2	355
3.30.70.100	9	914
3.30.70.1010	1	162
3.30.70.1130	1	299
3.30.70.1170	1	303
3.30.70.1220	1	71
3.30.70.1230	2	435
3.30.70.1390	1	184
3.30.70.1400	1	375
3.30.70.141	3	653
3.30.70.1470	4	400
3.30.70.250	2	1278
3.30.70.270	2	879
3.30.70.330	99	11078
3.30.70.340	2	478
3.30.70.360	1	481
3.30.70.420	1	463
3.30.70.60	1	90
3.30.70.680	1	179
3.30.70.830	1	179
3.30.70.890	3	1187
3.30.70.940	1	98
3.30.710.10	19	2760
3.30.720.10	2	191
3.30.740.10	2	178
3.30.760.10	3	658
3.30.780.10	1	113
3.30.800.10	3	1177
3.30.810.10	1	416
3.30.870.10	1	460
3.30.870.20	1	460
3.30.890.10	2	166
3.30.9.10	1	347
3.30.900.10	2	416
3.30.920.10	1	129
3.30.930.10	6	3281
3.30.960.10	1	437
3.40.1030.10	1	482
3.40.1080.10	1	481
3.40.1090.10	1	749
3.40.1190.20	4	1263
3.40.1230.10	1	121
3.40.1280.10	1	184
3.40.1380.20	2	1072
3.40.140.10	3	471
3.40.140.20	1	592
3.40.1490.10	1	117
3.40.1500.10	1	344
3.40.1810.10	3	282
3.40.190.10	11	2289
3.40.190.80	5	1528
3.40.20.10	12	3266
3.40.220.10	7	1301
3.40.250.10	9	1564
3.40.30.10	61	11040
3.40.309.10	5	2465
3.40.33.10	1	154
3.40.366.10	1	316
3.40.367.20	4	2725
3.40.390.10	21	7145
3.40.430.10	1	186
3.40.440.10	1	436
3.40.449.10	1	622
3.40.47.10	3	1213
3.40.470.10	2	452
3.40.50.1000	14	3565
3.40.50.10090	1	265
3.40.50.1010	1	164
3.40.50.10140	6	919
3.40.50.10190	20	3092
3.40.50.10260	1	306
3.40.50.10300	1	311
3.40.50.10380	2	1136
3.40.50.10420	1	203
3.40.50.10470	1	305
3.40.50.10490	2	925
3.40.50.10860	2	811
3.40.50.1100	4	1398
3.40.50.1220	5	1416
3.40.50.1240	5	1499
3.40.50.1260	1	416
3.40.50.1360	1	289
3.40.50.1370	1	321
3.40.50.1380	2	728
3.40.50.1400	1	359
3.40.50.1440	1	451
3.40.50.1460	9	2524
3.40.50.1480	3	1307
3.40.50.150	23	6841
3.40.50.1580	4	1179
3.40.50.170	2	510
3.40.50.1760	1	474
3.40.50.1820	27	11943
3.40.50.1950	1	204
3.40.50.20	2	772
3.40.50.200	2	843
3.40.50.2000	2	1013
3.40.50.2020	7	1840
3.40.50.2300	2	545
3.40.50.280	1	739
3.40.50.300	152	34378
3.40.50.360	4	897
3.40.50.410	19	8125
3.40.50.620	10	3673
3.40.50.720	70	23786
3.40.50.80	2	461
3.40.50.800	4	1772
3.40.50.880	4	944
3.40.50.920	2	671
3.40.50.970	4	1432
3.40.525.10	2	681
3.40.532.10	3	693
3.40.605.10	5	2465
3.40.630.10	13	5603
3.40.630.30	9	1882
3.40.640.10	12	5288
3.40.710.10	1	313
3.40.718.10	1	414
3.40.720.10	5	2523
3.40.80.10	3	500
3.40.800.10	2	628
3.40.800.20	5	1951
3.40.850.10	14	4966
3.40.910.10	1	369
3.40.930.10	1	379
3.40.970.10	1	50
3.40.980.10	1	181
3.50.30.30	3	2053
3.50.4.10	1	262
3.50.50.60	6	3009
3.50.80.10	1	209
3.60.10.10	5	1548
3.60.15.10	2	621
3.60.20.30	1	141
3.60.21.10	7	2294
3.60.40.10	4	1356
3.60.90.10	1	334
3.70.10.10	3	813
3.75.10.10	2	708
3.80.10.10	14	3705
3.80.20.20	6	3427
3.90.1030.10	1	109
3.90.110.10	4	1284
3.90.1150.10	12	5285
3.90.1170.10	1	149
3.90.1170.20	1	297
3.90.1170.30	1	482
3.90.1170.40	1	135
3.90.120.10	1	390
3.90.1200.10	2	790
3.90.1230.10	2	862
3.90.1260.10	1	412
3.90.1290.10	2	462
3.90.1450.10	1	94
3.90.1460.10	1	86
3.90.15.10	1	592
3.90.1530.10	1	121
3.90.1580.10	2	577
3.90.170.10	1	436
3.90.1750.10	2	730
3.90.1770.10	1	559
3.90.180.10	10	3580
3.90.190.10	47	13300
3.90.215.10	7	1723
3.90.226.10	12	3630
3.90.228.10	10	2475
3.90.228.20	1	622
3.90.230.10	3	1274
3.90.25.10	3	1034
3.90.260.10	3	2110
3.90.280.10	1	187
3.90.290.10	3	380
3.90.340.10	2	862
3.90.370.10	2	378
3.90.440.10	2	862
3.90.45.10	1	180
3.90.470.20	1	296
3.90.520.10	1	144
3.90.530.10	1	122
3.90.550.10	6	1584
3.90.570.10	1	173
3.90.600.10	1	430
3.90.640.10	4	1537
3.90.650.10	1	328
3.90.660.10	2	1047
3.90.70.10	15	5210
3.90.730.10	1	232
3.90.740.10	1	250
3.90.770.10	1	463
3.90.79.10	11	2017
3.90.810.10	3	171
3.90.850.10	1	223
3.90.940.10	1	127
3.90.950.10	2	424
4.10.1030.10	1	760
4.10.1080.10	1	337
4.10.110.10	2	119
4.10.1130.10	1	57
4.10.1140.10	1	53
4.10.1170.10	1	354
4.10.1220.10	1	699
4.10.1250.10	1	375
4.10.1290.10	1	42
4.10.170.10	1	42
4.10.180.30	1	141
4.10.230.10	1	40
4.10.260.30	1	57
4.10.280.10	7	508
4.10.280.20	1	88
4.10.280.30	1	72
4.10.320.10	1	221
4.10.365.10	1	84
4.10.40.20	1	53
4.10.40.30	1	41
4.10.400.10	6	917
4.10.410.10	6	449
4.10.530.10	7	1723
4.10.630.10	1	88
4.10.670.10	1	47
4.10.680.10	1	42
4.10.70.10	1	504
4.10.720.10	1	41
4.10.740.10	2	185
4.10.75.10	2	107
4.10.760.10	2	99
4.10.800.10	3	239
4.10.81.20	1	45
4.10.860.20	1	46
4.10.900.10	1	49
4.10.970.10	1	609

[truncated: 17 more sheets: A11, A12, A13, A14, A15, A16, A17, A18, A19, A20, A21, A22, A23, A24, A25, A26, A27]
