# Supplementary material for: Cancerouspdomains: comprehensive analysis of cancer type-specific recurrent somatic mutations in proteins and domains
Source: BMC Bioinformatics. 2017 Aug 16;18:370. doi: 10.1186/s12859-017-1779-5 (PMC5559820; doi:10.1186/s12859-017-1779-5)
Supplement: Supplementary file 2 — It contains three tables, Tables B1-B3 with the data gathered from different datasets. All these data are used in study. (XLSX 55782 kb) [file 12859_2017_1779_MOESM2_ESM.xlsx]

## Sheet: B1
UniProt ID	strand	HGNC ID	Chromosome	Approved Symbol	CATH domains	coding region start	coding region start	CATH domains	coding region start	coding region start	CATH domains	coding region start	coding region start	CATH domains	coding region start	coding region start	CATH domains	coding region start	coding region start	CATH domains	coding region start	coding region start	CATH domains	coding region start	coding region start	CATH domains	coding region start	coding region start	CATH domains	coding region start	coding region start	CATH domains	coding region start	coding region start
P42684	-	HGNC77	1	ABL2	1.10.510.10	179081456	179090854	1.20.120.330	179076855	179077229	3.30.200.20	179081456	179090854
P11310	+	HGNC89	1	ACADM	1.10.540.10	76194131	76228445	1.20.140.10	76194131	76228445	2.40.110.10	76194131	76228445
O00154	-	HGNC24157	1	ACOT7	3.10.129.10	6324665	6387388
P35609	+	HGNC164	1	ACTN2	1.10.238.10	236924411	236925916	1.20.58.60	236900458	236920869
O75173	-	HGNC220	1	ADAMTS4	3.40.390.10	161163604	161166666
P55265	-	HGNC225	1	ADAR	1.10.10.10	154574490	154574744	1.10.10.10	154574019	154574237
Q9NX46	+	HGNC21304	1	ADPRHL2	1.10.4080.10	36554557	36558984
P30520	-	HGNC292	1	ADSS	1.10.300.10	244572890	244615058	3.40.440.10	244572890	244615058	3.90.170.10	244572890	244615058
Q9UL18	+	HGNC3262	1	AGO1	2.170.260.10	36359661	36367161
P01019	-	HGNC333	1	AGT	2.30.39.10	230838889	230846496	3.30.497.10	230838889	230846496
O43865	+	HGNC344	1	AHCYL1	3.40.50.1480	110553868	110564299	3.40.50.720	110553868	110564299
O14862	-	HGNC357	1	AIM2	2.40.50.140	159032484	159036085
P54819	-	HGNC362	1	AK2	3.40.50.300	33478784	33502428
P27144	+	HGNC363	1	AK4	3.40.50.300	65614091	65691857
Q9Y6K8	+	HGNC365	1	AK5	3.40.50.300	77949038	78024352
P14550	+	HGNC380	1	AKR1A1	3.20.20.100	46027470	46035625
O43488	-	HGNC389	1	AKR7A2	3.20.20.100	19630721	19638530
O95154	-	HGNC390	1	AKR7A3	3.20.20.100	19609227	19615181
Q9Y243	-	HGNC393	1	AKT3	2.30.29.30	243809269	244006471
P30038	-	HGNC406	1	ALDH4A1	3.40.309.10	19199341	19228965	3.40.605.10	19199341	19228965
P04745	+	HGNC474	1	AMY1A	2.60.40.1180	104198998	104207139	3.20.20.80	104198998	104207139
P04745	+	HGNC475	1	AMY1B	2.60.40.1180	104198998	104207139	3.20.20.80	104198998	104207139
P04745	-	HGNC476	1	AMY1C	2.60.40.1180	104230073	104238215	3.20.20.80	104230073	104238215
P04746	+	HGNC477	1	AMY2A	2.60.40.1180	104160111	104168365	3.20.20.80	104160108	104168365
P02743	+	HGNC584	1	APCS	2.60.120.200	159557769	159558495
Q8N2Z9	+	HGNC23163	1	APITD1	1.10.20.10	10490575	10502387
P84077	+	HGNC652	1	ARF1	3.40.50.300	228284867	228285711
O15085	-	HGNC14580	1	ARHGEF11	1.20.900.10	156912552	156918201	2.30.29.30	156912552	156918201
Q5VV41	+	HGNC15515	1	ARHGEF16	2.30.30.40	3396130	3397082
O14497	+	HGNC11110	1	ARID1A	1.10.150.60	27094290	27097768
Q96BM9	-	HGNC25192	1	ARL8A	3.40.50.300	202103597	202113675
P27540	-	HGNC700	1	ARNT	3.30.450.20	150790490	150801675
Q5T4W7	+	HGNC727	1	ARTN	2.10.90.10	44402072	44402410
Q8TDY4	-	HGNC14987	1	ASAP3	1.25.40.20	23759953	23763718
Q9NR48	-	HGNC19088	1	ASH1L	1.20.920.10	155317581	155322565	2.170.270.10	155327471	155348311
O95861	-	HGNC1096	1	BPNT1	3.30.540.10	220232188	220253172	3.40.190.80	220232188	220253172
Q58F21	+	HGNC1105	1	BRDT	1.20.920.10	92428372	92433783
P02745	+	HGNC1241	1	C1QA	2.60.120.40	22965496	22965897
P02746	+	HGNC1242	1	C1QB	2.60.120.40	22987469	22987876
P02747	+	HGNC1245	1	C1QC	2.60.120.40	22973881	22974273
P04003	+	HGNC1325	1	C4BPA	2.10.70.10	207287447	207297521
P23280	+	HGNC1380	1	CA6	3.10.200.10	9006006	9034431
Q9HB71	+	HGNC30423	1	CACYBP	2.60.40.790	174973921	174977840
Q8N126	+	HGNC17601	1	CADM3	2.60.40.10	159141628	159162441
Q9Y6Y1	+	HGNC18806	1	CAMTA1	2.60.40.10	7725221	7737738
Q01518	+	HGNC20040	1	CAP1	2.160.20.70	40535508	40537202
P17655	+	HGNC1479	1	CAPN2	1.10.238.10	223900346	223962556	2.60.120.380	223900346	223962556	3.90.70.10	223900346	223962556
O14815	+	HGNC1486	1	CAPN9	3.90.70.10	230883270	230914806
P55211	-	HGNC1511	1	CASP9	3.40.50.1460	15819440	15844607
P06126	+	HGNC1634	1	CD1A	2.60.40.10	158224511	158226853	3.30.500.10	158224511	158226853
P29016	-	HGNC1635	1	CD1B	2.60.40.10	158298796	158301158	3.30.500.10	158298796	158301158
P15813	+	HGNC1637	1	CD1D	2.60.40.10	158150946	158153736	3.30.500.10	158150946	158153736
P06729	+	HGNC1639	1	CD2	2.60.40.10	117297264	117307110
P15529	+	HGNC6953	1	CD46	2.10.70.10	207930364	207934598
P08174	+	HGNC2665	1	CD55	2.10.70.10	207495729	207510039
P19256	-	HGNC1688	1	CD58	2.60.40.10	117078845	117087211
Q9UIB8	-	HGNC1704	1	CD84	2.60.40.10	160523931	160535517
P32320	+	HGNC1712	1	CDA	3.40.140.10	20915653	20945058
P60953	+	HGNC1736	1	CDC42	3.40.50.300	22404972	22418007
P42773	+	HGNC1789	1	CDKN2C	1.25.40.20	51436041	51439939
Q5SZQ8	-	HGNC11967	1	CELF3	3.30.70.330	151680363	151682227
Q5VT06	+	HGNC24238	1	CEP350	2.30.30.190	180062657	180062983
P08603	+	HGNC4883	1	CFH	2.10.70.10	196714955	196716440	2.10.70.10	196621305	196646796	2.10.70.10	196654364	196682866	2.10.70.10	196695902	196697651	2.10.70.10	196706136	196709921
Q03591	+	HGNC4888	1	CFHR1	2.10.70.10	196789029	196796134
P36980	+	HGNC4890	1	CFHR2	2.10.70.10	196927029	196928207
P36222	-	HGNC1932	1	CHI3L1	3.10.50.10	203148575	203154504	3.20.20.80	203148575	203154504
Q15782	+	HGNC1933	1	CHI3L2	3.10.50.10	111773369	111784983	3.20.20.80	111773369	111784983
Q9BZP6	+	HGNC17432	1	CHIA	3.10.50.10	111854817	111862881	3.20.20.80	111854817	111862881
Q13231	-	HGNC1936	1	CHIT1	3.10.50.10	203186259	203194989	3.20.20.80	203186259	203194989
P61024	+	HGNC19083	1	CKS1B	3.30.170.10	154947234	154951232
P51800	+	HGNC2026	1	CLCNKA	3.10.580.10	16357144	16360150
Q9Y696	+	HGNC13518	1	CLIC4	1.20.1050.10	25072045	25167425	3.40.30.10	25072045	25167419
P49760	-	HGNC2069	1	CLK2	1.10.510.10	155233020	155238582	3.30.200.20	155233020	155238582
P30085	+	HGNC18170	1	CMPK1	3.40.50.300	47799618	47840908
Q02246	+	HGNC2172	1	CNTN2	2.60.40.10	205027078	205033451
P17927	+	HGNC2334	1	CR1	2.10.70.10	207725311	207734295
P20023	+	HGNC2336	1	CR2	2.10.70.10	207639873	207641885
P29373	-	HGNC2339	1	CRABP2	2.40.128.20	156669820	156675234
O75629	-	HGNC2351	1	CREG1	2.30.110.10	167511537	167522833
P02741	-	HGNC2367	1	CRP	2.60.120.200	159683317	159684220
Q08257	-	HGNC2419	1	CRYZ	3.40.50.720	75171982	75190504	3.90.180.10	75171982	75190504
O75534	-	HGNC29905	1	CSDE1	2.40.50.140	115282379	115284242	2.40.50.140	115276684	115280108	2.40.50.140	115273188	115275370	2.40.50.140	115262339	115263332
Q99062	-	HGNC2439	1	CSF3R	2.60.40.10	36937839	36941265
P32929	+	HGNC2501	1	CTH	3.40.640.10	70877099	70904807	3.90.1150.10	70877099	70904798
Q9NSA3	-	HGNC16913	1	CTNNBIP1	1.10.10.490	9910778	9932121
P43235	-	HGNC2536	1	CTSK	3.90.70.10	150769277	150779235
P25774	-	HGNC2545	1	CTSS	3.90.70.10	150705524	150737190
Q6PI48	+	HGNC25538	1	DARS2	2.40.50.140	173794488	173826840	3.30.1360.30	173794488	173826840	3.30.930.10	173794488	173826840
O94760	-	HGNC2715	1	DDAH1	3.75.10.10	85787137	85930727
Q16832	+	HGNC2731	1	DDR2	2.60.120.260	162688929	162725458
Q9UHI6	+	HGNC2743	1	DDX20	3.40.50.300	112298667	112303451
O00273	-	HGNC2772	1	DFFA	1.10.1490.10	10521549	10523224	3.10.20.10	10527387	10532484
Q9NPF5	+	HGNC18291	1	DMAP1	1.10.10.60	44680538	44684343
Q9UQ16	+	HGNC29125	1	DNM3	3.40.50.300	171810812	172007527
Q01658	+	HGNC3017	1	DR1	1.10.20.10	93812203	93826193
Q9Y6W6	-	HGNC3065	1	DUSP10	3.40.250.10	221879755	221912671	3.90.190.10	221875756	221879676
Q9BVJ7	+	HGNC21480	1	DUSP23	3.90.190.10	159750891	159752125
P42892	-	HGNC3146	1	ECE1	1.10.1380.10	21546450	21599383	3.40.390.10	21546450	21599383
P20827	+	HGNC3221	1	EFNA1	2.60.40.420	155100502	155106438
O43432	-	HGNC3298	1	EIF4G3	1.25.40.180	21186962	21212734
P26378	+	HGNC3315	1	ELAVL4	3.30.70.330	50610641	50661246
P78545	+	HGNC3318	1	ELF3	1.10.150.50	201980406	201981482
P28324	-	HGNC3326	1	ELK4	1.10.10.10	205589705	205593009
P11171	+	HGNC3377	1	EPB41	1.20.80.10	29320004	29365766	2.30.29.30	29320004	29365766	3.10.20.90	29320001	29365766
P29317	-	HGNC3386	1	EPHA2	1.10.150.50	16451724	16456046	1.10.510.10	16456053	16460053	1.20.5.510	16460403	16461545	2.60.120.260	16475089	16482360	3.30.200.20	16456053	16460053
P29322	+	HGNC3391	1	EPHA8	1.10.510.10	22923843	22927579	2.60.40.10	22915693	22920178	3.30.200.20	22923843	22927579
P29323	+	HGNC3393	1	EPHB2	1.10.150.50	23238962	23240057	2.60.120.260	23037533	23111346
P07814	-	HGNC3418	1	EPRS	1.10.287.10	220170450	220170620	3.30.110.30	220142150	220160514	3.30.930.10	220142150	220160514	3.40.50.800	220142150	220160514
P42566	-	HGNC3419	1	EPS15	1.10.238.10	51910581	51930946
O43414	-	HGNC17276	1	ERI3	3.30.420.10	44687232	44804796
P62508	-	HGNC3474	1	ESRRG	1.10.565.10	216680283	216741365
Q01780	-	HGNC9138	1	EXOSC10	1.10.150.80	11137678	11140959
P13726	-	HGNC3541	1	F3	2.60.40.10	94996150	95007095
Q9Y624	-	HGNC14685	1	F11R	2.60.40.10	160969532	160971128
P05413	-	HGNC3557	1	FABP3	2.40.128.20	31838735	31845857
Q9UNN5	-	HGNC3578	1	FAF1	3.10.20.90	50907114	50941302	3.10.20.90	51171541	51253743
P12319	+	HGNC3609	1	FCER1A	2.60.40.10	159272664	159277551
P12318	+	HGNC3616	1	FCGR2A	2.60.40.10	161476126	161479863
P31994	+	HGNC3618	1	FCGR2B	2.60.40.10	161641184	161643754
P08637	-	HGNC3619	1	FCGR3A	2.60.40.10	161514551	161519579
O75015	-	HGNC3620	1	FCGR3B	2.60.40.10	161596043	161600937
O75636	-	HGNC3625	1	FCN3	3.90.215.10	27695729	27700008	4.10.530.10	27695729	27700008
P14324	+	HGNC3631	1	FDPS	1.10.600.10	155279856	155290397
Q96AE4	-	HGNC4004	1	FUBP1	3.30.1370.10	78428457	78430335
Q14376	-	HGNC4116	1	GALE	3.40.50.720	24122441	24125496	3.90.25.10	24122441	24125496
Q10471	+	HGNC4124	1	GALNT2	2.80.10.50	230338885	230415201
P04062	-	HGNC4177	1	GBA	2.60.40.1180	155204788	155209865	3.20.20.80	155204788	155209865
P32455	-	HGNC4182	1	GBP1	1.20.1000.10	89519040	89528916	3.40.50.300	89522740	89528916	3.40.50.300	89519040	89520507
O95749	+	HGNC4249	1	GGPS1	1.10.600.10	235498580	235506084
Q8TF65	+	HGNC18177	1	GIPC2	2.30.42.10	78546452	78560809
Q9NS18	-	HGNC16065	1	GLRX2	3.40.30.10	193065757	193070332
Q9Y692	+	HGNC4370	1	GMEB1	3.10.390.10	29018120	29023514
P08754	+	HGNC4387	1	GNAI3	1.10.400.10	110091352	110134852	3.40.50.300	110091352	110134852
Q96SL4	+	HGNC4559	1	GPX7	3.40.30.10	53068139	53074064
P28161	+	HGNC4634	1	GSTM2	1.20.1050.10	110210741	110251189	3.40.30.10	110210741	110251189
P21266	-	HGNC4635	1	GSTM3	1.20.1050.10	110279695	110282905	3.40.30.10	110279695	110282905
Q03013	+	HGNC4636	1	GSTM4	1.20.1050.10	110199015	110203873	3.40.30.10	110199015	110203873
Q00403	-	HGNC4648	1	GTF2B	1.10.472.10	89318898	89325899	2.20.25.10	89329744	89357178
Q02747	-	HGNC4682	1	GUCA2A	3.90.1450.10	42628579	42630319
P51858	-	HGNC4856	1	HDGF	2.30.30.160	156714802	156721220
P35914	-	HGNC5005	1	HMGCL	3.20.20.70	24128955	24147061
P28845	+	HGNC5208	1	HSD11B1	3.40.50.720	209878288	209907863
P17066	+	HGNC5239	1	HSPA6	3.30.30.30	161494464	161495603	3.30.420.40	161494464	161495603	3.90.640.10	161494464	161495603
Q9Y547	-	HGNC25019	1	HSPB11	2.60.120.260	54387329	54405754
P98160	-	HGNC5273	1	HSPG2	2.60.120.200	22149811	22154355
Q16666	+	HGNC5395	1	IFI16	2.40.50.140	158988043	159002331	2.40.50.140	159021514	159024631
P08887	+	HGNC6019	1	IL6R	2.60.40.10	154378163	154422422
P22301	-	HGNC5962	1	IL10	1.20.1250.10	206941983	206945725
Q9UHD0	+	HGNC5990	1	IL19	1.20.1250.10	206972294	207014402
Q9NYY1	+	HGNC6002	1	IL20	1.20.1250.10	207039270	207041906
Q8N6P7	-	HGNC13700	1	IL22RA1	2.60.40.10	24449899	24465198
Q8NI35	+	HGNC28881	1	INADL	1.10.287.650	62228687	62231962	2.30.42.10	62365295	62380267	2.30.42.10	62393486	62503676	2.30.42.10	62253639	62267302
P32019	-	HGNC6077	1	INPP5B	3.60.10.10	38341367	38355250
P05161	+	HGNC4053	1	ISG15	3.10.20.90	948954	949834
P23458	-	HGNC6190	1	JAK1	1.10.510.10	65300247	65307016	3.30.200.20	65300247	65307016
P05412	-	HGNC6204	1	JUN	1.20.5.170	59247797	59247985
Q13303	+	HGNC6229	1	KCNAB2	3.20.20.100	6111711	6157339
Q9UK17	-	HGNC6239	1	KCND3	3.30.710.10	112524913	112525332
O60341	+	HGNC29079	1	KDM1A	1.10.10.10	23356977	23409782	1.10.287.80	23356977	23409782
O75164	+	HGNC22978	1	KDM4A	2.30.30.140	44163526	44169762
Q8IZA0	-	HGNC30071	1	KIAA0319L	2.60.40.670	35916108	35919272
O60333	+	HGNC16636	1	KIF1B	2.60.200.20	10355144	10357034
Q99661	+	HGNC6393	1	KIF2C	3.40.850.10	45220431	45228045
Q53G59	-	HGNC19360	1	KLHL12	2.120.10.80	202861666	202878167
P06239	+	HGNC6524	1	LCK	1.10.510.10	32741979	32751314	2.30.30.40	32740389	32741984	3.30.200.20	32741979	32751314	3.30.505.10	32740389	32741984
O00214	+	HGNC6569	1	LGALS8	2.60.120.200	236689371	236703980	2.60.120.200	236706221	236711326
Q9NQ69	+	HGNC14222	1	LHX9	1.10.10.60	197896789	197898197
P02545	+	HGNC6636	1	LMNA	1.20.5.170	156105080	156106008	2.60.40.1260	156106129	156107492
Q5VWZ2	+	HGNC20440	1	LYPLAL1	3.40.50.1820	219347233	219385067
Q9UI95	-	HGNC6764	1	MAD2L2	3.30.900.10	11734834	11740657
Q96JY0	+	HGNC25929	1	MAEL	1.10.30.10	166958590	166960629
Q5TCQ9	+	HGNC29647	1	MAGI3	2.30.42.10	114184973	114189182
P61326	-	HGNC6815	1	MAGOH	3.30.1560.10	53692722	53704116
Q9BXW4	-	HGNC13353	1	MAP1LC3C	3.10.20.90	242159530	242162309
P49137	+	HGNC6887	1	MAPKAPK2	1.10.510.10	206858575	206906060	3.30.200.20	206858575	206906060	4.10.1170.10	206858713	206906060
Q9P0L2	+	HGNC6896	1	MARK1	1.10.510.10	220752777	220805646	1.10.8.10	220752777	220805646	3.30.200.20	220752777	220805646
O00187	-	HGNC6902	1	MASP2	2.10.25.10	11105465	11107135	2.10.70.10	11086944	11102961	2.40.10.10	11086944	11102961	2.60.120.290	11105465	11107135
Q6P0Q8	+	HGNC19035	1	MAST2	2.30.42.10	46497957	46499515
Q07820	-	HGNC6943	1	MCL1	1.10.437.10	150549922	150551519
O15151	+	HGNC6974	1	MDM4	1.10.245.10	204494686	204506562	3.30.40.10	204518619	204518807
Q9BV79	-	HGNC19691	1	MECR	3.40.50.720	29520536	29557327	3.90.180.10	29520536	29557327
Q95460	+	HGNC4975	1	MR1	2.60.40.10	181003210	181021642	3.30.500.10	181003210	181021642
P42345	-	HGNC3942	1	MTOR	1.20.120.150	11187075	11187853
Q99707	+	HGNC7468	1	MTR	1.10.288.10	237048517	237060941	3.10.196.10	237048517	237060941
Q9UIF7	-	HGNC7527	1	MUTYH	1.10.1670.10	45797423	45799197	1.10.340.30	45797423	45799197	3.90.79.10	45796205	45797443
Q5VVJ2	-	HGNC29401	1	MYSM1	1.10.10.60	59148172	59154759
P19878	-	HGNC7661	1	NCF2	1.25.40.10	183539944	183559463	2.30.30.40	183525285	183529335	3.10.20.90	183532332	183532692
P51955	-	HGNC7745	1	NEK2	1.10.510.10	211842626	211848820	3.30.200.20	211842626	211848820
Q8TDX7	+	HGNC13386	1	NEK7	1.10.510.10	198201711	198288649	3.30.200.20	198201711	198288649
Q13952	+	HGNC7806	1	NFYC	1.10.20.10	41204594	41218891
P01138	-	HGNC7808	1	NGF	2.10.90.10	115828693	115829052
Q96P20	+	HGNC16400	1	NLRP3	1.10.533.10	247582103	247586584
Q9HAN9	+	HGNC17877	1	NMNAT1	3.40.50.620	10032132	10042756
O00482	+	HGNC7984	1	NR5A2	1.10.565.10	200017407	200143335	3.30.50.10	200012934	200017397
P01111	-	HGNC7989	1	NRAS	3.40.50.300	115251209	115258780
P04629	+	HGNC8031	1	NTRK1	1.10.510.10	156845374	156851431	2.60.40.10	156830832	156844406	3.30.200.20	156845374	156851431	3.80.10.10	156830832	156843720
Q9Y266	+	HGNC8045	1	NUDC	2.60.40.790	27269193	27271961
Q5VST9	+	HGNC15719	1	OBSCN	2.30.30.40	228505673	228506586	2.60.40.10	228467581	228468313	2.60.40.10	228469699	228470780	2.60.40.10	228471260	228479633
Q9UM07	+	HGNC18368	1	PADI4	2.60.40.1700	17634718	17690247
Q99497	+	HGNC16369	1	PARK7	3.40.50.880	8022846	8045111
P09874	-	HGNC270	1	PARP1	1.20.142.10	226549172	226562012	3.30.1740.10	226576404	226579994	3.90.228.10	226549172	226562012
P40424	+	HGNC8632	1	PBX1	1.10.10.60	164769122	164781346
Q8NBP7	+	HGNC20001	1	PCSK9	3.40.50.200	55512253	55523881
Q07343	+	HGNC8781	1	PDE4B	1.10.1300.10	66827369	66838250
Q5T2W1	+	HGNC8821	1	PDZK1	2.30.42.10	145761310	145762200
P52209	+	HGNC8891	1	PGD	1.10.1040.10	10459178	10479803	1.20.5.320	10459175	10479803	3.40.50.720	10459178	10479803
Q96LB9	-	HGNC30014	1	PGLYRP3	3.40.80.10	153270434	153276332
Q96LB8	-	HGNC30015	1	PGLYRP4	3.40.80.10	153303245	153313040
O43175	+	HGNC8923	1	PHGDH	3.40.50.720	120254655	120279889
P01833	-	HGNC8968	1	PIGR	2.60.40.10	207112470	207112796
P30613	-	HGNC9020	1	PKLR	2.40.33.10	155260365	155271086	3.20.20.60	155260365	155271086	3.40.1380.20	155260365	155271086
P14555	-	HGNC9031	1	PLA2G2A	1.20.90.10	20302196	20304996
P47712	+	HGNC9035	1	PLA2G4A	2.60.40.150	186823487	186957637	3.40.1090.10	186823487	186957637
Q9Y2H5	-	HGNC17053	1	PLEKHA6	2.30.29.30	204230477	204237406
Q8IWE5	+	HGNC29131	1	PLEKHM2	2.30.29.30	16057129	16058871
O75051	-	HGNC9100	1	PLXNA2	3.10.20.90	208207901	208212997
Q15126	-	HGNC9141	1	PMVK	3.40.50.300	154897607	154909160
P14859	+	HGNC9212	1	POU2F1	1.10.10.60	167358849	167368479	1.10.260.40	167358849	167368479
Q9HAB8	+	HGNC25686	1	PPCS	3.40.50.10300	42922237	42925594
Q9UNP9	+	HGNC9258	1	PPIE	2.40.100.10	40211053	40228254	3.30.70.330	40204573	40208935
O43447	+	HGNC14651	1	PPIH	2.40.100.10	43124118	43133087
P50897	-	HGNC9325	1	PPT1	3.40.50.1820	40539735	40562846
Q13029	+	HGNC9347	1	PRDM2	2.170.270.10	14042104	14075915
Q06830	-	HGNC9352	1	PRDX1	3.40.30.10	45977003	45984714
P30041	+	HGNC16753	1	PRDX6	3.30.1020.10	173446537	173456999	3.40.30.10	173446537	173456999
P54646	+	HGNC9377	1	PRKAA2	1.10.510.10	57111076	57169692	3.30.200.20	57111076	57169692
O43741	-	HGNC9379	1	PRKAB2	2.60.40.10	146638125	146639463
Q96LA8	+	HGNC18241	1	PRMT6	2.70.160.11	107599338	107600462	3.40.50.150	107599338	107600462
O43395	+	HGNC17348	1	PRPF3	1.20.1390.10	150297401	150298300
Q9UKA9	+	HGNC17662	1	PTBP2	3.30.70.330	97235294	97236389
P35236	-	HGNC9659	1	PTPN7	3.90.190.10	202121779	202129742
Q15678	-	HGNC9647	1	PTPN14	3.90.190.10	214531267	214551333
Q9Y2R2	-	HGNC9652	1	PTPN22	3.90.190.10	114381227	114414244
P08575	+	HGNC9666	1	PTPRC	3.90.190.10	198698300	198725082
P10586	+	HGNC9670	1	PTPRF	2.60.40.10	44069566	44069853	3.90.190.10	44079312	44087671
Q14671	-	HGNC14957	1	PUM1	1.25.10.10	31406096	31426669
Q96NY8	-	HGNC19688	1	PVRL4	2.60.40.10	161049380	161049724
P20337	-	HGNC9778	1	RAB3B	3.40.50.300	52385688	52442737
P20338	+	HGNC9781	1	RAB4A	3.40.50.300	229407102	229438634
P57735	+	HGNC18238	1	RAB25	3.40.50.300	156031210	156039976
P47224	-	HGNC9797	1	RABIF	2.170.150.10	202850108	202858225
P62834	+	HGNC9855	1	RAP1A	3.40.50.300	112233983	112251803
Q9HCJ3	+	HGNC25577	1	RAVER2	3.30.70.330	65211066	65243424
Q9Y5S9	+	HGNC9905	1	RBM8A	3.30.70.330	145508227	145509208
Q96R05	+	HGNC30316	1	RBP7	2.40.128.20	10057320	10075887
P18754	+	HGNC1913	1	RCC1	2.130.10.30	28856403	28864423
Q9BYZ8	-	HGNC22977	1	REG4	3.10.100.10	120337243	120345770
P00797	-	HGNC9958	1	REN	2.40.70.10	204124146	204125913	2.40.70.10	204126490	204131190
Q08116	+	HGNC9991	1	RGS1	1.10.167.10	192545464	192548437	1.10.196.10	192545464	192548437
P41220	+	HGNC9998	1	RGS2	1.10.167.10	192779396	192780717	1.10.196.10	192779396	192780699
O15539	-	HGNC10001	1	RGS5	1.10.167.10	163117137	163138072	1.10.196.10	163117137	163138072
P49802	-	HGNC10003	1	RGS7	1.10.167.10	240966218	240975332	1.10.196.10	240966218	240975332
P57771	-	HGNC16810	1	RGS8	1.10.167.10	182615926	182636064
O15492	-	HGNC9997	1	RGS16	1.10.167.10	182569465	182571617	1.10.196.10	182569465	182571617
Q9NS28	+	HGNC14261	1	RGS18	1.10.167.10	192129509	192153645
P08134	-	HGNC669	1	RHOC	3.40.50.300	113244164	113246420
Q7L0Q8	+	HGNC17794	1	RHOU	3.40.50.300	228871583	228879400
Q05823	-	HGNC10050	1	RNASEL	1.25.40.20	182555026	182555880
Q99496	+	HGNC10061	1	RNF2	3.30.40.10	185056728	185062286
Q96LT9	+	HGNC18666	1	RNPC3	3.30.70.330	104087655	104094399
P15927	-	HGNC10290	1	RPA2	1.10.10.10	28218700	28223550	2.40.50.140	28218700	28241170
Q5VT52	+	HGNC29039	1	RPRD2	1.25.40.90	150337245	150414367
Q15418	+	HGNC10430	1	RPS6KA1	1.10.510.10	26872488	26883539	1.10.510.10	26885417	26900662	3.30.200.20	26872488	26883539	3.30.200.20	26885423	26900614
Q9HB90	-	HGNC19902	1	RRAGC	3.40.50.300	39318090	39325140
Q9Y3V2	+	HGNC21393	1	RWDD3	3.10.110.10	95699787	95710044
P48443	-	HGNC10479	1	RXRG	1.10.565.10	165370502	165380289
P23297	+	HGNC10486	1	S100A1	1.10.238.10	153603001	153604314
P33764	-	HGNC10493	1	S100A3	1.10.238.10	153520160	153520960
P26447	-	HGNC10494	1	S100A4	1.10.238.10	153516237	153517269
P06703	-	HGNC10496	1	S100A6	1.10.238.10	153507174	153507814
P31151	-	HGNC10497	1	S100A7	1.10.238.10	153430284	153431485
P05109	-	HGNC10498	1	S100A8	1.10.238.10	153362581	153363010
P06702	+	HGNC10499	1	S100A9	1.10.238.10	153330760	153333311
P60903	-	HGNC10487	1	S100A10	1.10.238.10	151955641	151958702
P80511	-	HGNC10489	1	S100A12	1.10.238.10	153346305	153347064
Q99584	-	HGNC10490	1	S100A13	1.10.238.10	153591373	153598947
Q96GD3	-	HGNC19003	1	SCMH1	2.30.30.160	41578955	41617353
P22307	+	HGNC10606	1	SCP2	3.30.1050.10	53493681	53516373
O75396	+	HGNC10700	1	SEC22B	3.30.450.50	145096547	145115826
P16581	-	HGNC10718	1	SELE	2.10.25.10	169699753	169702112	3.10.100.10	169699738	169702112
P14151	-	HGNC10720	1	SELL	2.10.25.10	169676519	169679585	3.10.100.10	169676519	169679585
P16109	-	HGNC10721	1	SELP	2.10.25.10	169582344	169586622	3.10.100.10	169582347	169586622
P01008	-	HGNC775	1	SERPINC1	2.30.39.10	173873029	173884001	3.30.497.10	173873029	173884001
Q15427	-	HGNC10771	1	SF3B4	3.30.70.330	149898685	149899638
P31947	+	HGNC10773	1	SFN	1.20.190.20	27189704	27190447
P29353	-	HGNC10840	1	SHC1	2.30.29.30	154940178	154942671	3.30.505.10	154936284	154938200
P12755	+	HGNC10896	1	SKI	3.10.260.20	2160476	2160781	3.10.390.10	2160860	2161144
Q9UPR3	-	HGNC24644	1	SMG5	3.40.50.1010	156220380	156222814
Q9UNH6	+	HGNC14971	1	SNX7	3.30.1520.10	99127360	99156729
Q96T58	+	HGNC17575	1	SPEN	2.40.290.10	16264039	16265919
P02549	-	HGNC11272	1	SPTA1	1.20.5.170	158651379	158656306	1.20.58.60	158651373	158656306
P19623	-	HGNC11296	1	SRM	2.30.140.10	11114924	11119999	3.40.50.150	11114924	11119999
P49458	+	HGNC11304	1	SRP9	3.30.720.10	225965646	225977058
Q8IYB3	+	HGNC16638	1	SRRM1	1.20.1390.10	24972532	24975517
Q16514	-	HGNC11545	1	TAF12	1.10.20.10	28931949	28944541
Q15543	-	HGNC11546	1	TAF13	1.10.20.10	109607294	109617623
P37802	-	HGNC11554	1	TAGLN2	1.10.418.10	159888718	159890253
Q13395	-	HGNC11568	1	TARBP1	3.40.1280.10	234527325	234529514
Q13148	+	HGNC11571	1	TARDBP	3.30.70.330	11080519	11082267	3.30.70.330	11076948	11080497
Q17R31	+	HGNC27010	1	TATDN3	3.20.20.140	212965276	212988495
P61812	+	HGNC11768	1	TGFB2	2.10.90.10	218609380	218614617
Q5T1C6	-	HGNC17947	1	THEM4	3.10.129.10	151847366	151867660
Q92956	+	HGNC11912	1	TNFRSF14	2.10.50.10	2490563	2490934
Q9UNG2	-	HGNC11932	1	TNFSF18	1.20.5.170	173010509	173019882	2.60.120.40	173010509	173019888
P45379	-	HGNC11949	1	TNNT2	1.20.5.350	201328340	201332446
Q13625	-	HGNC12000	1	TP53BP2	1.25.40.20	223968581	223981090	2.30.30.40	223968581	223981090
O15350	+	HGNC12003	1	TP73	1.10.150.50	3647604	3649424	2.60.40.720	3624260	3644285
O43617	-	HGNC19942	1	TRAPPC3	3.30.1380.20	36602830	36614978
Q9UPN9	-	HGNC16290	1	TRIM33	1.20.920.10	114940392	114948155	3.30.40.10	114940392	114948155
Q9H8W5	-	HGNC19018	1	TRIM45	2.60.40.10	117656071	117660691
Q9NX07	+	HGNC30813	1	TRNAU1AP	3.30.70.330	28879623	28887890	3.30.70.330	28891216	28897709
O95881	-	HGNC24626	1	TXNDC12	3.40.30.10	52486607	52520701
Q8N2K1	-	HGNC19268	1	UBE2J2	3.10.110.10	1190855	1203371
Q9NPD8	-	HGNC25009	1	UBE2T	3.10.110.10	202301055	202304881
O95155	+	HGNC12500	1	UBE4B	3.30.40.10	10238798	10240011
Q9Y5K5	-	HGNC19678	1	UCHL5	3.40.532.10	192992985	193028389
Q9BZX2	+	HGNC12562	1	UCK2	3.40.50.300	165797071	165877057
P06132	+	HGNC12591	1	UROD	3.20.20.210	45477938	45481167
P22415	-	HGNC12593	1	USF1	4.10.280.10	161010054	161010633
Q9UK80	+	HGNC12620	1	USP21	3.90.70.10	161131016	161135234
Q8TEY7	-	HGNC20059	1	USP33	3.30.40.10	78205003	78207369
Q9UKW4	-	HGNC12659	1	VAV3	1.10.418.10	108319908	108507490
P19320	+	HGNC12663	1	VCAM1	2.60.40.10	101186040	101190196
Q7Z7D3	-	HGNC28873	1	VTCN1	2.60.40.10	117699196	117712737
P47992	+	HGNC10645	1	XCL1	2.40.50.40	168549303	168550455
P54577	-	HGNC12840	1	YARS	1.10.240.10	33246696	33282844	3.40.50.620	33246696	33282844
P67809	+	HGNC8014	1	YBX1	2.40.50.140	43148390	43162345
Q13105	-	HGNC12936	1	ZBTB17	3.30.710.10	16273478	16274986
P10074	+	HGNC4930	1	ZBTB48	3.30.710.10	6640679	6641029
Q9NP64	+	HGNC30246	1	ZCCHC17	2.40.50.140	31782946	31819487
O95405	+	HGNC6775	1	ZFYVE9	4.10.720.10	52732359	52732481
Q9BU19	-	HGNC26049	1	ZNF692	3.30.160.60	249144954	249149634
Q8TDX5	+	HGNC19288	2	ACMSD	3.20.20.140	135596253	135659427
P24666	+	HGNC122	2	ACP1	3.40.50.2300	264968	277301
Q04771	-	HGNC171	2	ACVR1	1.10.510.10	158594075	158634671	3.30.200.20	158594075	158634671
P27037	+	HGNC173	2	ACVR2A	1.10.510.10	148672802	148684765	3.30.200.20	148672802	148684765
P78536	-	HGNC195	2	ADAM17	3.40.390.10	9645362	9666358
P21549	+	HGNC341	2	AGXT	3.40.640.10	241808283	241818235	3.90.1150.10	241808283	241818235
Q9UM73	-	HGNC427	2	ALK	1.10.510.10	29416719	29448326	3.30.200.20	29416719	29448326
P05187	+	HGNC439	2	ALPP	3.40.720.10	233243579	233246415
Q9H6X2	+	HGNC21014	2	ANTXR1	3.40.50.410	69240743	69318008
P09525	+	HGNC542	2	ANXA4	1.10.220.10	70008698	70052638
Q53QZ3	+	HGNC21030	2	ARHGAP15	1.10.555.10	144245022	144525732
Q9NR80	+	HGNC684	2	ARHGEF4	2.30.30.40	131785598	131797669
Q9Y689	-	HGNC696	2	ARL5A	3.40.50.300	152659798	152684650
Q9ULI0	-	HGNC29230	2	ATAD2B	1.20.920.10	23985214	24009015
P15336	-	HGNC784	2	ATF2	1.20.5.170	175945436	175957913
P31939	+	HGNC794	2	ATIC	1.10.287.440	216176866	216214375	3.40.140.20	216176866	216214375	3.40.50.1380	216176866	216214375
Q99728	-	HGNC952	2	BARD1	1.25.40.20	215617182	215645324	3.30.40.10	215646177	215674217	3.40.50.10190	215593402	215610559
Q9UIF8	-	HGNC963	2	BAZ2B	1.20.920.10	160176778	160182212
O00499	-	HGNC1052	2	BIN1	2.30.30.40	127806104	127808412
Q9NR09	+	HGNC13516	2	BIRC6	3.10.110.10	32819118	32842857
Q13873	+	HGNC1078	2	BMPR2	1.10.510.10	203379646	203417576	2.10.60.10	203329552	203332387	3.30.200.20	203379646	203417576
Q9Y376	+	HGNC20292	2	CAB39	1.25.10.10	231624717	231683416
P62158	-	HGNC1445	2	CALM2	1.10.238.10	47387917	47397902
P40121	-	HGNC1474	2	CAPG	3.40.20.10	85622018	85628388
Q6MZZ7	-	HGNC16663	2	CAPN13	1.10.238.10	30953628	30961316
Q14790	+	HGNC1509	2	CASP8	3.30.70.1470	202149685	202149996	3.40.50.1460	202137403	202149996
P78556	+	HGNC10619	2	CCL20	2.40.50.40	228680172	228681793
O60583	+	HGNC1600	2	CCNT2	1.10.472.10	135676443	135710814
P01732	-	HGNC1706	2	CD8A	2.60.40.10	87016871	87017789
Q9UJ71	-	HGNC17935	2	CD207	3.10.100.10	71058183	71060902
P49450	+	HGNC1851	2	CENPA	1.10.20.10	27009065	27016144
O15519	+	HGNC1876	2	CFLAR	3.40.50.1460	202010119	202028693
P15882	-	HGNC1943	2	CHN1	1.10.555.10	175664846	175816906	3.30.505.10	175664846	175816906	3.30.60.20	175664846	175816906
O76071	+	HGNC14280	2	CIAO1	2.130.10.10	96932089	96937086
Q8N3C7	+	HGNC26108	2	CLIP4	2.30.30.190	29383243	29390375
P49759	-	HGNC2068	2	CLK1	1.10.510.10	201718157	201726034	3.30.200.20	201718157	201726034
P12111	-	HGNC2213	2	COL6A3	4.10.410.10	238233455	238242098
P31327	+	HGNC2323	2	CPS1	3.40.50.1380	211532916	211542622
P07316	-	HGNC2409	2	CRYGB	2.60.20.10	209007364	209010840
P07320	-	HGNC2411	2	CRYGD	2.60.20.10	208986399	208989193
Q9GZU7	+	HGNC21614	2	CTDSP1	3.40.50.1000	219266846	219269145
P16410	+	HGNC2505	2	CTLA4	2.60.40.10	204732771	204736126
O60759	-	HGNC9506	2	CYTIP	2.30.42.10	158283919	158291234
P07108	+	HGNC2690	2	DBI	1.20.80.10	120124631	120128323
Q14203	-	HGNC2711	2	DCTN1	2.30.30.190	74604799	74605362
Q9NVP1	+	HGNC2741	2	DDX18	3.40.50.300	118577299	118582239
Q16760	+	HGNC2851	2	DGKD	3.30.60.20	234344523	234346061
Q16854	+	HGNC2858	2	DGUOK	3.40.50.300	74154146	74185860
P25686	+	HGNC5228	2	DNAJB2	1.10.287.110	220144556	220146704
Q9Y6K1	-	HGNC2978	2	DNMT3A	1.10.720.50	25469176	25470937	2.30.30.160	25469176	25470937
Q9ULA0	-	HGNC2981	2	DNPEP	3.40.630.10	220239579	220252515
Q99704	+	HGNC2990	2	DOK1	2.30.29.30	74782795	74783563
P27487	-	HGNC3009	2	DPP4	2.140.10.30	162849795	162929917	3.40.50.1820	162849795	162929917
Q9BPU6	+	HGNC20637	2	DPYSL5	3.20.20.140	27121368	27167532
P23919	-	HGNC3061	2	DTYMK	3.40.50.300	242615544	242626197
Q05923	-	HGNC3068	2	DUSP2	3.90.190.10	96809564	96810501
Q8WTR2	+	HGNC18894	2	DUSP19	3.90.190.10	183943854	183960350
P24534	+	HGNC3208	2	EEF1B2	3.30.70.60	207027221	207027604
Q8NDI1	+	HGNC29144	2	EHBP1	1.10.418.10	63169889	63175520
P19525	-	HGNC9437	2	EIF2AK2	1.10.510.10	37334418	37362651	3.30.160.20	37366779	37374948	3.30.200.20	37334418	37362651
Q9NZJ5	-	HGNC3255	2	EIF2AK3	1.10.510.10	88857325	88882948	3.30.200.20	88857325	88882948
O60573	+	HGNC3293	2	EIF4E2	3.30.760.10	233421238	233433691
Q99814	+	HGNC3374	2	EPAS1	3.30.450.20	46588165	46603693
P54764	-	HGNC3388	2	EPHA4	2.60.120.260	222428664	222436883
Q15303	-	HGNC3432	2	ERBB4	1.10.510.10	212285213	212495197	2.10.220.10	212522501	213403178	3.30.200.20	212285213	212495197	3.80.20.20	212522501	213403178
P07148	-	HGNC3555	2	FABP1	2.40.128.20	88422575	88427535
Q12884	-	HGNC3590	2	FAP	2.140.10.30	163027500	163083107	3.40.50.1820	163027500	163083107
P68106	+	HGNC3712	2	FKBP1B	3.10.50.40	24272723	24286059
P02751	-	HGNC3778	2	FN1	2.10.10.10	216288073	216289939	2.10.70.10	216288073	216289939	2.10.70.10	216292921	216300383	2.10.70.10	216292921	216299418	2.60.40.10	216249685	216262402	2.60.40.10	216240355	216248745	2.60.40.10	216273021	216274423
P23945	-	HGNC3969	2	FSHR	3.80.10.10	49195886	49381507
Q96C23	+	HGNC24063	2	GALM	2.70.98.10	38893304	38960704
P28676	+	HGNC15990	2	GCA	1.10.238.10	163204217	163216750
Q06210	-	HGNC4241	2	GFPT1	3.40.50.10490	69553323	69575317
O94925	+	HGNC4331	2	GLS	3.40.710.10	191765345	191796312
P22749	+	HGNC4414	2	GNLY	1.10.225.10	85923111	85924781
P56524	-	HGNC14063	2	HDAC4	3.40.800.20	239975199	240033242
Q00341	-	HGNC4857	2	HDLBP	3.30.1370.10	242195805	242202151	3.30.1370.10	242189261	242192449
P52789	+	HGNC4923	2	HK2	3.30.420.40	75061756	75118062	3.40.367.20	75061756	75118062
P50135	+	HGNC5028	2	HNMT	3.40.50.150	138722062	138771697
O43464	+	HGNC14348	2	HTRA2	2.30.42.10	74757533	74760109	2.40.10.10	74757533	74760109
O75874	-	HGNC5382	2	IDH1	3.40.718.10	209101805	209116274
Q9BYX4	-	HGNC18873	2	IFIH1	3.40.50.300	163137891	163150118
P24593	-	HGNC5474	2	IGFBP5	4.10.40.20	217559162	217559320
Q14623	-	HGNC5956	2	IHH	3.30.1380.10	219920558	219925107
P01583	-	HGNC5991	2	IL1A	2.80.10.50	113532646	113537201
P01584	-	HGNC5992	2	IL1B	2.80.10.50	113587940	113590355
P14778	+	HGNC5993	2	IL1R1	2.60.40.10	102774236	102791063
Q8WYH8	+	HGNC19421	2	ING5	3.30.40.10	242662421	242664431
Q92835	+	HGNC6079	2	INPP5D	3.30.505.10	233925189	233986954
P35568	-	HGNC6125	2	IRS1	2.30.29.30	227662653	227663444
P06756	+	HGNC6150	2	ITGAV	2.130.10.130	187455156	187541572	2.60.40.1460	187455156	187541572	2.60.40.1510	187455156	187541572	2.60.40.1530	187455156	187541572
Q9NZM3	-	HGNC6184	2	ITSN2	1.20.900.10	24433687	24469186	2.60.40.150	24426512	24443911
Q9Y2W7	+	HGNC15523	2	KCNIP3	1.10.238.10	96047377	96049794
P50053	+	HGNC6315	2	KHK	3.40.1190.20	27310128	27322615
O14782	-	HGNC6321	2	KIF3C	3.40.850.10	26203637	26204767
Q3ZCW2	+	HGNC25012	2	LGALSL	2.60.120.200	64682726	64685559
P48059	+	HGNC6616	2	LIMS1	2.10.110.10	109271531	109276088	2.10.110.10	109289367	109292406
Q14766	+	HGNC6714	2	LTBP1	3.90.290.10	33585681	33586548
Q9Y2U5	-	HGNC6854	2	MAP3K2	3.10.20.90	128087566	128096554
Q9UPY8	+	HGNC6892	2	MAPRE3	1.10.418.10	27245087	27247134
P31153	+	HGNC6904	2	MAT2A	3.30.300.10	85766411	85770892
Q96PE7	-	HGNC16732	2	MCEE	3.10.180.10	71337102	71351580
Q8NI22	-	HGNC18451	2	MCFD2	1.10.238.10	47132604	47136231
Q12866	+	HGNC7027	2	MERTK	1.10.510.10	112760686	112786033	2.60.40.10	112733022	112751980	3.30.200.20	112760686	112786033
Q8WV92	-	HGNC25207	2	MITD1	1.20.58.280	99788107	99797419
Q9H8S9	-	HGNC16015	2	MOB1A	1.20.140.30	74383697	74399796
Q05195	+	HGNC6761	2	MXD1	4.10.280.10	70143348	70164456
O43639	+	HGNC7665	2	NCK2	2.30.30.40	106471520	106471696	2.30.30.40	106497897	106498067	2.30.30.40	106498119	106498352	3.30.505.10	106498404	106509629
P19338	-	HGNC7667	2	NCL	3.30.70.330	232322402	232325188
Q15788	+	HGNC7668	2	NCOA1	4.10.630.10	24930206	24930469
P20929	-	HGNC7720	2	NEB	2.30.30.40	152406191	152409193
Q9Y3R4	+	HGNC7759	2	NEU2	2.120.10.10	233897382	233899764
Q9H9Q4	-	HGNC25737	2	NHEJ1	1.10.287.450	219942817	220023083	2.170.210.10	219942817	220023083
O15259	-	HGNC7905	2	NPHP1	2.30.30.40	110922720	110927465
P43354	-	HGNC7981	2	NR4A2	1.10.565.10	157182258	157184927
O60462	+	HGNC8005	2	NRP2	2.60.120.260	206548081	206610613	2.60.120.290	206548081	206610613
O75147	-	HGNC29092	2	OBSL1	2.60.40.10	220435636	220435953	2.60.40.10	220421440	220422301	2.60.40.10	220424196	220430230
P11926	-	HGNC8109	2	ODC1	2.40.37.10	10580852	10585157	3.20.20.10	10580852	10585157
Q9NTK5	-	HGNC28833	2	OLA1	1.10.150.300	174940156	175111542	3.10.20.30	174940156	175111542	3.40.50.300	174940156	175111542
Q96RG2	-	HGNC17270	2	PASK	1.10.510.10	242046073	242062289	3.30.450.20	242078098	242079973
P23760	-	HGNC8617	2	PAX3	1.10.10.60	223086064	223096933
Q15365	+	HGNC8647	2	PCBP1	3.30.1370.10	70314915	70315133	3.30.1370.10	70315710	70315943
Q15116	-	HGNC8760	2	PDCD1	2.60.40.10	242794461	242795114
O43924	-	HGNC8788	2	PDE6D	2.70.50.40	232597664	232645823
Q15084	-	HGNC30168	2	PDIA6	3.40.30.10	10929874	10932023
Q15118	+	HGNC8809	2	PDK1	1.20.140.20	173420966	173460694	3.30.565.10	173420966	173460694
Q9BY49	-	HGNC18281	2	PECR	3.40.50.720	216904000	216946463
P08567	+	HGNC9070	2	PLEK	1.10.10.10	68608017	68615530	2.30.29.30	68615561	68622945
Q9HB20	+	HGNC14338	2	PLEKHA3	2.30.29.30	179345597	179355525
Q96CS7	+	HGNC19236	2	PLEKHB2	2.30.29.30	131878515	131888330
Q9H2H8	-	HGNC9262	2	PPIL3	2.40.100.10	201736132	201752337
O75688	+	HGNC9276	2	PPM1B	3.60.40.10	44428342	44436393
P63098	-	HGNC9317	2	PPP3R1	1.10.238.10	68408097	68444262
O94806	-	HGNC9408	2	PRKD3	2.30.29.30	37501618	37505055
O75569	-	HGNC9438	2	PRKRA	3.30.160.20	179312239	179315106
P04070	+	HGNC9451	2	PROC	2.10.25.10	128180505	128183716
O75400	-	HGNC16463	2	PRPF40A	1.10.10.440	153528992	153529555	1.10.10.440	153515694	153519211
P29074	+	HGNC9656	2	PTPN4	2.30.42.10	120702796	120712755
Q99952	+	HGNC9649	2	PTPN18	3.90.190.10	131113696	131128510
Q16849	-	HGNC9676	2	PTPRN	3.90.190.10	220154950	220162001
Q8TB72	-	HGNC14958	2	PUM2	1.25.10.10	20451378	20463062
Q16769	+	HGNC9753	2	QPCT	3.40.630.10	37571971	37599967
P62820	-	HGNC9758	2	RAB1A	3.40.50.300	65315671	65357048
P11234	+	HGNC9840	2	RALB	3.40.50.300	121036262	121050770
P49792	+	HGNC9848	2	RANBP2	2.30.29.30	109380506	109380907
Q70E73	-	HGNC14436	2	RAPH1	3.10.20.90	204312754	204326584
Q9H477	-	HGNC30325	2	RBKS	3.40.1190.20	28004484	28113181
P29558	-	HGNC9907	2	RBMS1	3.30.70.330	161143566	161169701
P05451	+	HGNC9951	2	REG1A	3.10.100.10	79348690	79350338
Q06141	-	HGNC8601	2	REG3A	3.10.100.10	79384354	79385892
Q9UBZ9	-	HGNC14060	2	REV1	3.30.1490.100	100022901	100055287	3.40.50.10190	100058882	100079008
P62745	+	HGNC668	2	RHOB	3.40.50.300	20647236	20647787
P17081	+	HGNC17736	2	RHOQ	3.40.50.300	46770186	46808159
O60930	-	HGNC18466	2	RNASEH1	3.30.420.10	3593377	3599736	3.40.970.10	3604394	3605771
P61587	-	HGNC671	2	RND3	3.40.50.300	151326635	151343876
Q96BH1	-	HGNC14662	2	RNF25	3.10.110.10	219530935	219536662
Q96AT9	+	HGNC10293	2	RPE	3.20.20.70	210867386	210884512
P62979	+	HGNC10417	2	RPS27A	3.10.20.90	55459961	55462005
P31350	+	HGNC10452	2	RRM2	1.10.620.20	10262923	10269251
Q9UPW6	-	HGNC21637	2	SATB2	1.10.260.40	200193495	200213548	1.10.260.40	200173542	200188650
Q96I15	+	HGNC18161	2	SCLY	3.40.640.10	238969693	239006969	3.90.1150.10	238969693	239006969
P07093	-	HGNC8951	2	SERPINE2	2.30.39.10	224840586	224866559	3.30.497.10	224840586	224866559
Q9Y3B4	-	HGNC30096	2	SF3B6	3.30.70.330	24290634	24299098
Q9BWU0	+	HGNC13813	2	SLC4A1AP	2.60.200.20	27887064	27887969
O75643	-	HGNC30859	2	SNRNP200	1.10.150.20	96940752	96944350	1.10.3380.10	96940752	96944350	2.60.40.150	96940752	96944350
Q15036	+	HGNC14979	2	SNX17	3.30.1520.10	27593611	27596742
Q07889	-	HGNC11187	2	SOS1	1.10.20.10	39281901	39347562	1.10.840.10	39222462	39281882	1.20.870.10	39222462	39281882	1.20.900.10	39222462	39281882	2.30.29.30	39222462	39281882
P23497	+	HGNC11206	2	SP100	3.10.390.10	231368918	231375851
Q9UBP0	+	HGNC11233	2	SPAST	1.20.58.280	32289234	32323866
Q15772	+	HGNC16901	2	SPEG	2.60.40.10	220326753	220329329
P35270	+	HGNC11257	2	SPR	3.40.50.720	73114574	73118663
Q7Z698	-	HGNC17722	2	SPRED2	2.30.29.30	65561739	65659120
Q01082	+	HGNC11275	2	SPTBN1	1.10.418.10	54843383	54848613
Q16629	-	HGNC10789	2	SRSF7	3.30.70.330	38976762	38977330
P05455	+	HGNC11316	2	SSB	1.10.10.10	170657471	170665019	3.30.70.330	170657471	170665043	3.30.70.330	170666898	170667697
O75886	-	HGNC11358	2	STAM2	1.25.40.90	153001468	153032155
P42224	-	HGNC11362	2	STAT1	1.10.238.10	191840542	191874728	1.10.532.10	191841575	191874728	1.20.1050.20	191840542	191874728	2.60.40.630	191840542	191874728	3.30.505.10	191840542	191874728
Q658P3	+	HGNC24592	2	STEAP3	3.40.50.720	120003073	120005407
O75716	+	HGNC11394	2	STK16	1.10.510.10	220110758	220113278
O94768	-	HGNC11396	2	STK17B	1.10.510.10	197002302	197028034	3.30.200.20	197002302	197028034
O00506	-	HGNC11404	2	STK25	1.10.510.10	242438091	242447449	3.30.200.20	242438091	242447449
O00338	+	HGNC11456	2	SULT1C2	3.40.50.300	108910130	108924917
Q6IMI6	+	HGNC33543	2	SULT1C3	3.40.50.300	108863651	108881804
O75897	+	HGNC11457	2	SULT1C4	3.40.50.300	108994812	109003885
P63165	-	HGNC12502	2	SUMO1	3.10.20.90	203071978	203103173
P25103	-	HGNC11526	2	TACR1	1.20.1070.10	75276690	75426059
P10646	-	HGNC11760	2	TFPI	4.10.410.10	188348932	188353069	4.10.410.10	188331767	188348850
P01135	-	HGNC11765	2	TGFA	2.10.25.10	70683568	70692844
Q8WY91	-	HGNC23187	2	THAP4	2.40.128.20	242524023	242545885
P31483	-	HGNC11802	2	TIA1	3.30.70.330	70444042	70454951
P98066	+	HGNC11898	2	TNFAIP6	2.60.120.290	152222722	152236044	3.10.100.10	152220468	152226538
Q9BVS5	-	HGNC26070	2	TRMT61B	3.40.50.150	29073067	29092713
Q15631	+	HGNC12379	2	TSN	1.20.58.190	122513356	122522940	1.20.58.200	122513356	122522940
Q8WZ42	-	HGNC12403	2	TTN	1.10.510.10	179398942	179399904	2.60.40.10	179665122	179669368	2.60.40.10	179497514	179498038	2.60.40.10	179639924	179640373	2.60.40.10	179436725	179437306	2.60.40.10	179399953	179400990	2.60.40.10	179396233	179396538	2.60.40.10	179393941	179395098	2.60.40.10	179391741	179392175	3.30.200.20	179398942	179399904
Q969M7	+	HGNC12480	2	UBE2F	3.10.110.10	238881810	238949976
O95045	+	HGNC23061	2	UPP2	3.40.50.1580	158851771	158980376
Q8NBZ7	-	HGNC17729	2	UXS1	3.40.50.720	106710499	106774551	3.90.25.10	106710499	106774551
P09327	+	HGNC12690	2	VIL1	3.40.20.10	219295577	219302035
Q86Y07	+	HGNC12719	2	VRK2	1.10.510.10	58276006	58366949	3.30.200.20	58276006	58366949
O14980	-	HGNC12825	2	XPO1	1.25.10.10	61706089	61715809
P13010	+	HGNC12833	2	XRCC5	1.10.1600.10	216974160	217024815	1.25.40.240	217024816	217069065	2.40.290.10	216974160	217024815	3.40.50.410	216974160	217024815
P27348	-	HGNC12854	2	YWHAQ	1.20.190.20	9725450	9770580
P43403	+	HGNC12858	2	ZAP70	1.10.510.10	98340500	98355919	1.10.930.10	98340500	98349653	3.30.200.20	98340500	98355919	3.30.505.10	98340500	98355919
Q96IU4	-	HGNC28235	3	ABHD14B	3.40.50.1820	52003444	52005685
Q709F0	-	HGNC30211	3	ACAD11	1.10.540.10	132277817	132347190	1.20.140.10	132277817	132347190	2.40.110.10	132277817	132347190
P15309	+	HGNC125	3	ACPP	3.40.50.1240	132036397	132086567
Q13705	+	HGNC174	3	ACVR2B	1.10.510.10	38519911	38524745	2.10.60.10	38518780	38519663	3.30.200.20	38519911	38524745
Q03154	+	HGNC177	3	ACY1	3.40.630.10	52018081	52021014
P54922	+	HGNC269	3	ADPRH	1.10.4080.10	119301017	119306722
O75891	-	HGNC3978	3	ALDH1L1	1.10.1200.10	125856706	125869349	3.10.25.10	125869341	125899810	3.40.50.170	125869341	125899810
P48728	-	HGNC473	3	AMT	2.40.30.110	49454975	49459798	3.30.1360.120	49454975	49459798	3.30.70.1400	49454975	49459798	4.10.1250.10	49454975	49459798
Q96CW1	+	HGNC564	3	AP2M1	2.60.40.1170	183898697	183901401
P05090	-	HGNC612	3	APOD	2.40.128.20	195295773	195306265
Q9UKG1	+	HGNC24035	3	APPL1	1.20.1270.60	57261912	57282341
P18085	-	HGNC655	3	ARF4	3.40.50.300	57557941	57582866
Q9H0F7	+	HGNC13210	3	ARL6	3.40.50.300	97486997	97516890
Q9NVJ2	+	HGNC25564	3	ARL8B	3.40.50.300	5164202	5220389
P06276	-	HGNC983	3	BCHE	3.40.50.1820	165491172	165548736
P41182	-	HGNC1001	3	BCL6	3.30.160.60	187443319	187444608	3.30.160.60	187442743	187442829	3.30.710.10	187447805	187451468
Q9BWV1	+	HGNC17173	3	BOC	2.60.40.10	112998778	113002277
P55201	+	HGNC14255	3	BRPF1	1.20.920.10	9783751	9784846	2.30.30.160	9787516	9788991
Q7Z6A9	-	HGNC21087	3	BTLA	2.60.40.10	112190194	112218129
Q9ULU8	-	HGNC1426	3	CADPS	2.30.29.30	62535641	62570872
Q14012	-	HGNC1459	3	CAMK1	1.10.510.10	9799497	9809432	3.30.200.20	9799497	9809432
P49913	+	HGNC1472	3	CAMP	3.10.450.10	48265083	48266791
Q9Y6W3	+	HGNC1484	3	CAPN7	2.60.120.380	15288278	15292764
Q08722	-	HGNC1682	3	CD47	2.60.40.10	107790021	107799179
P33681	-	HGNC1700	3	CD80	2.60.40.10	119248758	119263711
P30304	-	HGNC1725	3	CDC25A	3.40.250.10	48200521	48209355
P05452	+	HGNC11891	3	CLEC3B	3.10.100.10	45072405	45077413
Q9P232	-	HGNC2173	3	CNTN3	2.60.40.10	74313650	74334482
Q9Y678	+	HGNC2236	3	COPG1	2.60.40.1480	128987822	128996264	3.30.310.10	128987822	128996264
P00450	-	HGNC2295	3	CP	2.60.40.420	148891503	148939521
P36551	-	HGNC2321	3	CPOX	3.40.1500.10	98299529	98312017
P22914	-	HGNC2417	3	CRYGS	2.60.20.10	186256487	186256747
P01040	+	HGNC2481	3	CSTA	3.10.450.10	122044140	122060411
O15194	+	HGNC16890	3	CTDSPL	3.40.50.1000	37998611	38022322
P35222	+	HGNC2514	3	CTNNB1	1.25.10.10	41266594	41278182
Q7L2E3	+	HGNC16716	3	DHX30	3.30.160.20	47859607	47882441
Q12959	-	HGNC2900	3	DLG1	2.30.42.10	196857431	196869617	2.30.42.10	196817877	196846296
Q96FX2	-	HGNC27717	3	DPH3	3.10.660.10	16302276	16306382
Q9H8V3	+	HGNC3155	3	ECT2	3.40.50.10190	172480249	172482082
Q13144	+	HGNC3261	3	EIF2B5	1.25.40.180	183860662	183862728
Q14240	+	HGNC3284	3	EIF4A2	3.40.50.300	186502255	186504383
Q04637	+	HGNC3296	3	EIF4G1	1.25.40.180	184045388	184052588
P29320	+	HGNC3387	3	EPHA3	1.10.510.10	89457248	89521764	3.30.200.20	89457248	89521764
P54762	+	HGNC3392	3	EPHB1	1.10.150.50	134968182	134977959	2.60.40.10	134872996	134881021
P54753	+	HGNC3394	3	EPHB3	2.60.120.260	184280138	184290741
P61328	-	HGNC3668	3	FGF12	2.80.10.50	191861911	192125813
P49789	-	HGNC3701	3	FHIT	3.30.428.10	59737954	60522694
O75369	+	HGNC3755	3	FLNB	1.10.418.10	57994292	58067472	2.60.40.10	58111382	58120382	2.60.40.10	58132687	58141775	2.60.40.10	58148970	58155363	2.60.40.10	58155424	58156486
P51114	+	HGNC4023	3	FXR1	3.30.1370.10	180669089	180671615
P49915	+	HGNC4378	3	GMPS	3.40.50.880	155611352	155628611
Q13439	+	HGNC4427	3	GOLGA4	1.10.220.60	37381681	37396654
Q8N335	+	HGNC28956	3	GPD1L	1.10.1040.10	32148204	32207393	3.40.50.720	32148204	32207393
P07203	-	HGNC4553	3	GPX1	3.40.30.10	49394838	49395671
Q9C0E4	-	HGNC23841	3	GRIP2	2.30.42.10	14555178	14555955
P49841	-	HGNC4617	3	GSK3B	1.10.510.10	119545676	119812280	3.30.200.20	119545676	119812280
P29083	+	HGNC4650	3	GTF2E1	3.30.40.10	120469736	120489648
P46976	+	HGNC4699	3	GYG1	3.90.550.10	148709428	148742017
Q92522	-	HGNC4722	3	H1FX	1.10.10.10	129034376	129034615
Q93099	-	HGNC4892	3	HGD	2.60.120.10	120347229	120400957
P29459	+	HGNC5969	3	IL12A	1.20.1250.10	159706910	159713241
P12268	-	HGNC6053	3	IMPDH2	3.20.20.70	49061818	49066782
Q6DN90	-	HGNC29112	3	IQSEC1	2.30.29.30	12949963	12955016
O43187	+	HGNC6113	3	IRAK2	1.10.533.10	10206642	10242111
Q92831	+	HGNC8638	3	KAT2B	1.20.920.10	20189478	20194014	3.40.630.30	20167460	20181826
Q9Y691	+	HGNC6286	3	KCNMB2	4.10.81.20	178525198	178543454
Q9HAQ2	-	HGNC16666	3	KIF9	3.40.850.10	47299011	47318863
P52294	-	HGNC6394	3	KPNA1	1.25.10.10	122145912	122186209
P02788	-	HGNC6720	3	LTF	3.40.190.10	46477688	46501294
Q9BS40	-	HGNC13347	3	LXN	3.10.450.10	158384437	158390266
Q96QZ7	-	HGNC946	3	MAGI1	2.20.70.10	65425653	65433711	2.30.42.10	65415198	65415443	2.30.42.10	65365164	65367737
Q16644	+	HGNC6888	3	MAPKAPK3	1.10.510.10	50655093	50685375	3.30.200.20	50655093	50685375
P48740	-	HGNC6901	3	MASP1	2.10.25.10	186970956	187003791	2.10.70.10	186953561	186970955	2.40.10.10	186953561	186970955	2.60.120.290	186970956	187003791
O95243	-	HGNC6919	3	MBD4	1.10.340.30	129150346	129152904
Q96RQ3	-	HGNC6936	3	MCCC1	2.40.50.100	182733228	182737976
Q99685	-	HGNC17038	3	MGLL	3.40.50.1820	127411043	127540660
P08473	+	HGNC7154	3	MME	1.10.1380.10	154802850	154898245	3.40.390.10	154802850	154898245
P26927	-	HGNC7380	3	MST1	2.40.10.10	49721505	49722788
Q04912	-	HGNC7381	3	MST1R	1.10.510.10	49924871	49932692	3.30.1680.10	49935965	49940918	3.30.200.20	49924871	49932692
Q99836	+	HGNC7562	3	MYD88	1.10.533.10	38180210	38180503	3.40.50.10140	38181423	38182711
Q15746	-	HGNC7590	3	MYLK	2.60.40.10	123440975	123444913
Q9NPC7	+	HGNC14955	3	MYNN	3.30.710.10	169492093	169496640
Q9GZZ1	-	HGNC29533	3	NAA50	3.40.630.30	113440609	113464795
P52298	-	HGNC7659	3	NCBP2	3.30.70.330	196663884	196669373
P16333	+	HGNC7664	3	NCK1	2.30.30.40	136646844	136647026	2.30.30.40	136664517	136664693	3.30.505.10	136665039	136667292
Q9Y2I1	+	HGNC18006	3	NISCH	3.30.1520.10	52489709	52504886
Q96T66	-	HGNC20989	3	NMNAT3	3.40.50.620	139279854	139346565
O75469	+	HGNC7968	3	NR1I2	1.10.565.10	119528981	119535939
P49116	+	HGNC7972	3	NR2C2	1.10.565.10	15071834	15084455
Q96DE0	+	HGNC26442	3	NUDT16	3.90.79.10	131100649	131101336
O15527	+	HGNC8125	3	OGG1	1.10.1670.10	9791971	9798814	1.10.340.30	9791971	9798814	3.30.310.40	9791971	9798814
Q9BXB4	-	HGNC16397	3	OSBPL11	2.30.29.30	125295203	125301811
Q9NWU1	+	HGNC26063	3	OXSM	3.40.47.10	25832623	25835982
O95747	+	HGNC8508	3	OXSR1	1.10.510.10	38207368	38271879	3.10.20.90	38289198	38294379	3.30.200.20	38207368	38271879
Q9Y6F1	+	HGNC273	3	PARP3	1.20.142.10	51978803	51982469	3.90.228.10	51978803	51982469
Q460N5	+	HGNC29232	3	PARP14	3.40.220.10	122432273	122437081	3.40.220.10	122419766	122420338	3.40.220.10	122420396	122427084	3.90.228.10	122439125	122447441
Q460N3	+	HGNC26876	3	PARP15	3.40.220.10	122335894	122345852	3.90.228.10	122350935	122354944
Q86U86	-	HGNC30064	3	PBRM1	1.20.920.10	52678739	52696156	1.20.920.10	52661347	52668756	1.20.920.10	52696214	52713600	1.20.920.10	52649379	52661343	1.20.920.10	52643597	52643962	1.20.920.10	52637573	52643578
Q8WUM4	+	HGNC8766	3	PDCD6IP	1.20.120.560	33840221	33896711	1.20.140.50	33840221	33896711	1.25.40.280	33840221	33896711
P11177	-	HGNC8808	3	PDHB	3.40.50.920	58413763	58419362	3.40.50.970	58413763	58419362
Q9UPQ7	-	HGNC17704	3	PDZRN3	2.30.42.10	73434909	73450113
P35080	-	HGNC8882	3	PFN2	3.30.450.30	149684284	149688639
P42336	+	HGNC8975	3	PIK3CA	1.10.1070.11	178916614	178952149	1.25.40.70	178916614	178952149	2.60.40.150	178916614	178952149	3.10.20.90	178916614	178952149	3.30.1010.10	178916614	178952149
O43157	-	HGNC9103	3	PLXNB1	3.10.20.90	48445895	48455082
Q9Y4D7	-	HGNC9107	3	PLXND1	3.10.20.90	129279271	129281947
P37231	+	HGNC9236	3	PPARG	1.10.565.10	12421424	12475641	3.30.50.10	12421424	12475641
P13861	-	HGNC9391	3	PRKAR2A	1.20.890.10	48884897	48885019
P41743	+	HGNC9404	3	PRKCI	1.10.510.10	169993067	170020912	3.10.20.90	169940530	169981177	3.30.200.20	169993067	170020912
P07225	-	HGNC9456	3	PROS1	2.10.25.10	93615526	93624630
P23470	+	HGNC9671	3	PTPRG	3.10.200.10	61734632	62153764	3.90.190.10	62229563	62278979
P20339	+	HGNC9783	3	RAB5A	3.40.50.300	19992433	20025219
Q9NRW1	-	HGNC14902	3	RAB6B	3.40.50.300	133553458	133614273
P51149	+	HGNC9788	3	RAB7A	3.40.50.300	128514211	128532262
Q86YS6	-	HGNC19983	3	RAB43	3.40.50.300	128810007	128840307
Q9NS91	-	HGNC18278	3	RAD18	3.30.40.10	8983457	9005068
P04049	-	HGNC9829	3	RAF1	1.10.510.10	12626105	12641673	3.10.20.90	12650758	12660069	3.30.200.20	12626105	12641673	3.30.60.20	12650284	12650748
P10826	+	HGNC9865	3	RARB	1.10.565.10	25611305	25638002	3.30.50.10	25502749	25611259
P52756	+	HGNC9902	3	RBM5	3.30.70.330	50142572	50144292
P50120	-	HGNC9920	3	RBP2	2.40.128.20	139171960	139195297
Q9H1K0	-	HGNC20759	3	RBSN	4.10.860.20	15116134	15116271
P61586	-	HGNC667	3	RHOA	3.40.50.300	49397644	49413021
Q8IYW5	-	HGNC26661	3	RNF168	3.30.40.10	196215516	196230043
Q9Y6N7	-	HGNC10249	3	ROBO1	2.60.40.10	78717390	78719433	2.60.40.10	78766543	78988068
Q9HCK4	+	HGNC10250	3	ROBO2	2.60.40.10	77607112	77612325
Q9Y265	-	HGNC10474	3	RUVBL1	3.40.50.300	127800095	127842566
P55735	-	HGNC10697	3	SEC13	2.130.10.10	10342974	10360833
Q99574	+	HGNC8943	3	SERPINI1	2.30.39.10	167506965	167543108	3.30.497.10	167506965	167543108
Q9BYW2	-	HGNC18420	3	SETD2	2.170.270.10	47139453	47161825
Q53H47	+	HGNC10762	3	SETMAR	2.170.270.10	4345097	4355334
P12757	+	HGNC10897	3	SKIL	3.10.260.20	170078528	170078833
P48431	+	HGNC11195	3	SOX2	1.10.30.10	181430263	181430511
Q8NBK3	-	HGNC20376	3	SUMF1	3.90.1580.10	4403830	4508712
P02787	+	HGNC11740	3	TF	3.40.190.10	133467270	133497461
Q14188	-	HGNC11751	3	TFDP2	1.10.10.10	141692907	141697519
P02786	-	HGNC11763	3	TFRC	1.20.930.40	195778815	195800876	3.40.630.10	195778815	195800876	3.50.30.30	195778815	195800876
P37173	+	HGNC11773	3	TGFBR2	2.10.60.10	30664708	30691900
P40225	-	HGNC11795	3	THPO	1.20.1250.10	184090810	184093752
P10828	-	HGNC11799	3	THRB	1.10.565.10	24164377	24185125	3.30.50.10	24185117	24193954
Q495A1	+	HGNC26838	3	TIGIT	2.60.40.10	114012966	114018463
P50591	-	HGNC11925	3	TNFSF10	2.60.120.40	172224284	172229448
Q9UKE5	-	HGNC30765	3	TNIK	1.10.510.10	170879099	171177851	3.30.200.20	170879099	171177851
Q07912	-	HGNC19297	3	TNK2	1.10.510.10	195605937	195615323	3.30.200.20	195605937	195615323	4.10.680.10	195599319	195605324
P63316	-	HGNC11943	3	TNNC1	1.10.238.10	52485293	52488030
Q92547	-	HGNC17008	3	TOPBP1	3.40.50.10190	133372240	133379970	3.40.50.10190	133368398	133371419	3.40.50.10190	133342241	133347420
Q9H3D4	+	HGNC15979	3	TP63	1.10.150.50	189607239	189612114	2.60.40.720	189526232	189586462
P62995	-	HGNC10781	3	TRA2B	3.30.70.330	185639833	185643268
Q96Q11	+	HGNC17341	3	TRNT1	1.10.3090.10	3170812	3189835	3.30.460.10	3170812	3189835
Q6IBS0	-	HGNC9621	3	TWF2	3.40.20.10	52263160	52264953	3.40.20.10	52265214	52273016
Q86VQ6	-	HGNC20667	3	TXNRD3	3.40.30.10	126366079	126373847
Q8TBC4	-	HGNC12470	3	UBA3	1.10.10.520	69104590	69127034	3.10.20.260	69104590	69127034	3.40.50.720	69104590	69127067
P51965	+	HGNC12477	3	UBE2E1	3.10.110.10	23848761	23932094
O94888	-	HGNC29119	3	UBXN7	3.10.20.90	196083564	196089263	3.40.30.10	196094922	196118760
P11172	+	HGNC12563	3	UMPS	3.20.20.70	124456672	124462928	3.40.50.2020	124449337	124456713
Q13107	-	HGNC12627	3	USP4	3.90.70.10	49315821	49321995
Q92995	+	HGNC12611	3	USP13	1.10.8.10	179478905	179483554
O94966	-	HGNC12617	3	USP19	2.60.40.790	49153987	49154583
P40337	+	HGNC12687	3	VHL	1.10.750.10	10183691	10191646	2.60.40.780	10183691	10191646
Q6H8Q1	-	HGNC19195	4	ABLIM2	1.10.950.10	7968821	7994636
P07327	-	HGNC249	4	ADH1A	3.40.50.720	100197783	100212067	3.90.180.10	100197783	100212067
P00325	-	HGNC250	4	ADH1B	3.40.50.720	100228999	100242484	3.90.180.10	100228999	100242484
P00326	-	HGNC251	4	ADH1C	3.40.50.720	100257911	100273828	3.90.180.10	100257911	100273828
P08319	-	HGNC252	4	ADH4	3.40.50.720	100045595	100065372	3.90.180.10	100045595	100065372
P11766	-	HGNC253	4	ADH5	3.40.50.720	99993570	100009847	3.90.180.10	99993570	100009847
P20933	-	HGNC318	4	AGA	3.60.20.30	178352864	178358564
Q12904	+	HGNC10648	4	AIMP1	2.40.50.140	107249376	107268774
P02768	+	HGNC399	4	ALB	1.10.246.10	74270117	74286012
Q9UM13	-	HGNC24077	4	ANAPC10	2.60.120.260	145916599	146018663
P58335	-	HGNC21732	4	ANTXR2	3.40.50.410	80957168	80993602
P12429	+	HGNC541	4	ANXA3	1.10.220.10	79475628	79531266
P08758	-	HGNC543	4	ANXA5	1.10.220.10	122589625	122617743
Q8WZ64	-	HGNC16924	4	ARAP2	2.30.29.30	36179553	36212051
P15514	+	HGNC651	4	AREG	2.10.25.10	75314877	75316136
Q9BUT1	-	HGNC32389	4	BDH2	3.40.50.720	104000861	104017410
P12645	+	HGNC1070	4	BMP3	2.10.90.10	81967662	81974687
O00238	+	HGNC1077	4	BMPR1B	1.10.510.10	96045023	96075731	3.30.200.20	96045023	96075731
Q10588	+	HGNC1118	4	BST1	1.20.82.10	15704864	15733402	3.40.50.720	15704864	15733402
P35070	-	HGNC1121	4	BTC	2.10.25.10	75675877	75681165
Q13557	-	HGNC1462	4	CAMK2D	1.10.510.10	114421646	114682193	3.10.450.50	114378498	114421651	3.30.200.20	114421646	114682193
P42574	-	HGNC1504	4	CASP3	3.30.70.1470	185550428	185552271	3.40.50.1460	185550428	185556546
P55212	-	HGNC1507	4	CASP6	3.40.50.1460	110610488	110624550
P32238	-	HGNC1570	4	CCKAR	4.10.670.10	26491077	26491888
P20248	-	HGNC1578	4	CCNA2	1.10.472.10	122738795	122742192
P28907	+	HGNC1667	4	CD38	1.20.82.10	15780170	15850222	3.40.50.720	15780170	15850222
Q92772	-	HGNC1782	4	CDKL2	1.10.510.10	76523356	76551171	3.30.200.20	76523356	76551171
Q02224	-	HGNC1856	4	CENPE	3.40.850.10	104102550	104119472
Q13363	-	HGNC2494	4	CTBP1	3.40.50.720	1206780	1232083
P09341	+	HGNC4602	4	CXCL1	2.40.50.40	74735388	74736247
P19875	-	HGNC4603	4	CXCL2	2.40.50.40	74963475	74964624
P10145	+	HGNC6025	4	CXCL8	2.40.50.40	74607276	74608178
P02778	-	HGNC10637	4	CXCL10	2.40.50.40	76943085	76943967
O14625	-	HGNC10638	4	CXCL11	2.40.50.40	76955948	76956492
Q9UN19	+	HGNC16500	4	DAPP1	2.30.29.30	100774458	100789318
P27707	+	HGNC2704	4	DCK	3.40.50.300	71859553	71895092
P32321	-	HGNC2710	4	DCTD	3.40.140.10	183812602	183838453
P01133	+	HGNC3229	4	EGF	2.10.25.10	110915942	110920898
P06730	-	HGNC3287	4	EIF4E	3.30.760.10	99802241	99850122
Q9UHY7	+	HGNC24599	4	ENOPH1	3.40.50.1000	83351983	83381270
P54756	-	HGNC3389	4	EPHA5	1.10.510.10	66201684	66231742	3.30.200.20	66201684	66231742
O14944	+	HGNC3443	4	EREG	2.10.25.10	75246763	75248407
P03951	+	HGNC3529	4	F11	2.40.10.10	187205272	187209765
P12104	-	HGNC3556	4	FABP2	2.40.128.20	120240198	120243253
Q969H0	-	HGNC16712	4	FBXW7	2.130.10.10	153244035	153259027
P02671	-	HGNC3661	4	FGA	1.20.5.50	155507932	155508785	1.20.5.50	155510032	155510662	3.90.215.10	155505278	155505880	4.10.530.10	155505278	155505880
P02675	+	HGNC3662	4	FGB	1.20.5.50	155487824	155491799	1.20.5.50	155486978	155487739	3.90.215.10	155487824	155491799	4.10.530.10	155487824	155491799
P09038	+	HGNC3676	4	FGF2	2.80.10.50	123748357	123813548
P22607	+	HGNC3690	4	FGFR3	2.60.40.10	1795758	1806070
P02679	-	HGNC3694	4	FGG	1.20.1050.10	155526048	155526077	1.20.5.50	155526048	155533586	3.40.30.10	155526048	155526077	3.90.215.10	155526048	155533017	4.10.530.10	155526048	155533017
Q9H227	+	HGNC19069	4	GBA3	3.20.20.80	22694639	22820543
P02774	-	HGNC4187	4	GC	1.10.246.10	72618264	72649743
P42262	+	HGNC4572	4	GRIA2	3.40.190.10	158262528	158283980	3.40.50.2300	158142267	158255242
Q12849	-	HGNC4610	4	GRSF1	3.30.70.330	71698102	71701970
Q02108	+	HGNC4685	4	GUCY1A3	3.30.70.1230	156634565	156651380
Q02153	+	HGNC4687	4	GUCY1B3	3.30.70.1230	156723540	156727558
P02724	-	HGNC4702	4	GYPA	1.20.5.70	145035917	145039896
P0C0S5	-	HGNC4741	4	H2AFZ	1.10.20.10	100869621	100871326
Q16836	+	HGNC4799	4	HADH	1.10.1040.10	108911089	108955459	3.40.50.720	108911089	108955459
Q04756	+	HGNC4894	4	HGFAC	2.40.10.10	3447617	3451122
Q14103	-	HGNC5036	4	HNRNPD	3.30.70.330	83278024	83279891	3.30.70.330	83279916	83280790
O60760	-	HGNC17890	4	HPGDS	1.20.1050.10	95220633	95255779	3.40.30.10	95220633	95255779
O14792	-	HGNC5194	4	HS3ST1	3.40.50.300	11400708	11401523
Q8NBQ5	-	HGNC22960	4	HSD17B11	3.40.50.720	88258505	88312140
P83110	+	HGNC30406	4	HTRA3	2.30.42.10	8304198	8307860
P60568	-	HGNC6001	4	IL2	1.20.1250.10	123372909	123377534
P35968	-	HGNC6307	4	KDR	1.10.510.10	55953922	55964877	2.60.40.10	55976897	55984770	2.60.40.10	55964944	55970827	3.30.200.20	55953922	55964877
P10721	+	HGNC6342	4	KIT	1.10.510.10	55593488	55604597	2.60.40.10	55524182	55593400	3.30.200.20	55593488	55604597
O95198	+	HGNC6353	4	KLHL2	2.120.10.80	166220755	166243191
Q9UHA4	-	HGNC15606	4	LAMTOR3	3.30.450.30	100803153	100815116
Q8TBB1	-	HGNC6657	4	LNX1	2.30.42.10	54343029	54344884
P50851	-	HGNC1742	4	LRBA	1.10.1540.10	151246978	151511864	2.30.29.40	151246978	151511864
P30533	-	HGNC6701	4	LRPAP1	1.20.81.10	3521873	3533988
Q13257	-	HGNC6763	4	MAD2L1	3.30.900.10	120981275	120987888
P53779	-	HGNC6872	4	MAPK10	1.10.510.10	86950395	87080571	3.30.200.20	86950395	87080571
P53582	+	HGNC15789	4	METAP1	3.90.230.10	99955455	99982459
Q8IVH4	+	HGNC18871	4	MMAA	1.10.287.130	146560505	146576583	1.20.5.170	146560505	146576583	3.40.50.300	146560505	146576583
Q96HR8	-	HGNC25126	4	NAF1	2.40.10.230	164061424	164069585
P19838	+	HGNC7794	4	NFKB1	1.10.533.10	103533264	103534668	2.60.40.10	103451071	103514610	2.60.40.340	103451071	103514610
P08235	-	HGNC7979	4	NR3C2	1.10.565.10	149002497	149075932
P53370	-	HGNC8053	4	NUDT6	3.90.79.10	123813985	123838676
Q9BW91	+	HGNC8056	4	NUDT9	3.90.79.10	88356200	88379170
O43252	-	HGNC8603	4	PAPSS1	3.10.400.10	108535407	108641334	3.40.50.300	108535407	108641334	3.40.50.620	108535407	108641334
O60245	+	HGNC8659	4	PCDH7	2.60.40.60	30723948	30724283
Q8N4E4	-	HGNC29524	4	PDCL2	3.40.30.10	56422834	56435984
O76074	-	HGNC8784	4	PDE5A	1.10.1300.10	120419758	120460155
P02776	-	HGNC8861	4	PF4	2.40.50.40	74846923	74847257
O00444	+	HGNC11397	4	PLK4	1.10.510.10	128802293	128807350	3.30.200.20	128802293	128807350
P02775	-	HGNC9240	4	PPBP	2.40.50.40	74852991	74853690
Q8N3J5	-	HGNC25415	4	PPM1K	3.60.40.10	89183785	89199485
Q08209	-	HGNC9314	4	PPP3CA	3.60.21.10	101947024	102267952
Q12923	+	HGNC9646	4	PTPN13	2.30.42.10	87685809	87689002	3.90.190.10	87720324	87735662
P51157	-	HGNC9768	4	RAB28	3.40.50.300	13378189	13485743
A0AV96	-	HGNC30358	4	RBM47	3.30.70.330	40440175	40440462
Q06330	+	HGNC5724	4	RBPJ	2.60.40.10	26387982	26432473	2.60.40.1450	26387982	26432473	2.80.10.50	26387982	26432473
Q96PM5	-	HGNC17479	4	RCHY1	2.20.28.10	76407750	76415888	3.30.40.10	76415880	76417121
P35251	-	HGNC9969	4	RFC1	3.40.50.10190	39313064	39318614
O14924	+	HGNC9994	4	RGS12	1.10.167.10	3415891	3418768	2.30.42.10	3317949	3318197
P78317	+	HGNC10067	4	RNF4	3.30.40.10	2514823	2515543
Q9HBX9	+	HGNC19718	4	RXFP1	4.10.400.10	159493867	159514554
P25815	+	HGNC10504	4	S100P	1.10.238.10	6695660	6698766
O95487	+	HGNC10704	4	SEC24B	2.60.40.1670	110415983	110460738	3.40.50.410	110415983	110460738
O94855	-	HGNC10706	4	SEC24D	2.60.40.1670	119644672	119736187	3.40.50.410	119644672	119736187
Q8WTS6	-	HGNC30412	4	SETD7	2.170.270.10	140432819	140468089	2.20.110.10	140432885	140468089
P78314	+	HGNC10825	4	SH3BP2	3.30.505.10	2831798	2834731
O94813	+	HGNC11086	4	SLIT2	3.80.10.10	20493419	20526773	3.80.10.10	20530619	20543241
Q15797	+	HGNC6767	4	SMAD1	2.60.200.10	146463817	146479083
P37840	-	HGNC11138	4	SNCA	1.10.287.700	90647781	90756817	3.40.190.10	90756761	90756817	3.40.190.10	90743465	90756724
P08294	+	HGNC11181	4	SOD3	2.60.40.200	24801198	24801863
Q96PQ0	+	HGNC16698	4	SORCS2	2.60.40.670	7719764	7725606
P20155	-	HGNC11245	4	SPINK2	3.30.60.30	57677912	57687761
Q9ULZ2	+	HGNC24133	4	STAP1	3.30.505.10	68447158	68472042
O43704	-	HGNC17845	4	SULT1B1	3.40.50.300	70592808	70620934
P49888	-	HGNC11377	4	SULT1E1	3.40.50.300	70707714	70723361
Q9P2M4	+	HGNC29246	4	TBC1D14	1.10.10.750	7000880	7032098	1.10.8.270	7000880	7032098
P42680	-	HGNC11719	4	TEC	2.30.29.30	48170635	48230630
Q15399	-	HGNC11847	4	TLR1	3.40.50.10140	38798097	38798579
O60603	+	HGNC11848	4	TLR2	3.40.50.10140	154625965	154626411
Q9BXR5	-	HGNC15634	4	TLR10	3.40.50.10140	38774883	38775347
P42681	-	HGNC12434	4	TXK	3.30.505.10	48091797	48112582
P61077	-	HGNC12476	4	UBE2D3	3.10.110.10	103718574	103747664
P61086	+	HGNC4914	4	UBE2K	1.10.8.10	39699948	39780051	3.10.110.10	39699948	39780051
P09936	+	HGNC12513	4	UCHL1	3.40.532.10	41258994	41270087
O60701	-	HGNC12525	4	UGDH	1.20.5.100	39501849	39523131	3.40.50.720	39501765	39523131
P16662	+	HGNC12554	4	UGT2B7	3.40.50.2000	69964389	69978217
P49767	-	HGNC12682	4	VEGFC	2.10.90.10	177632711	177650713
Q8WYK0	-	HGNC24436	5	ACOT12	3.10.129.10	80640010	80689914
P07550	+	HGNC286	5	ADRB2	1.10.530.40	148207181	148207489	1.20.1070.10	148206395	148207489
P49419	-	HGNC877	5	ALDH7A1	3.40.309.10	125880695	125930802	3.40.605.10	125880695	125930802
Q9H9E1	-	HGNC13208	5	ANKRA2	1.25.40.20	72848624	72856960
P08133	-	HGNC544	5	ANXA6	1.10.220.10	150481011	150527458
O95704	-	HGNC20708	5	APBB3	2.30.29.30	139938400	139940961
P25054	+	HGNC583	5	APC	1.10.287.450	112103041	112136996	1.20.5.10	112090591	112102052
Q8WWN8	-	HGNC24097	5	ARAP3	1.10.150.50	141059813	141060052
P15848	-	HGNC714	5	ARSB	3.30.1120.10	78076222	78280947	3.40.720.10	78076222	78280947
O00244	-	HGNC798	5	ATOX1	3.30.70.100	151125888	151138111
Q93088	+	HGNC1047	5	BHMT	3.20.20.330	78407709	78426936
Q9H8M2	-	HGNC25818	5	BRD9	1.20.920.10	887475	891269
Q9UQM7	-	HGNC1460	5	CAMK2A	1.10.510.10	149627371	149669151	3.30.200.20	149627371	149669151
Q16566	+	HGNC1464	5	CAMK4	1.10.510.10	110560224	110819762	3.30.200.20	110560224	110819762
Q16568	+	HGNC24323	5	CARTPT	4.10.40.30	71015773	71016439
P14635	+	HGNC1579	5	CCNB1	1.10.472.10	68467226	68473455
P51946	-	HGNC1594	5	CCNH	1.10.472.10	86690265	86708610
P08571	-	HGNC1628	5	CD14	3.80.10.10	140011563	140012492
P04233	-	HGNC1697	5	CD74	1.10.870.10	149784243	149785862	4.10.800.10	149782183	149782872
P30307	-	HGNC1727	5	CDC25C	3.40.250.10	137621416	137626383
P50613	+	HGNC1778	5	CDK7	1.10.510.10	68530803	68572959	3.30.200.20	68530803	68572959
Q8IVW4	-	HGNC15483	5	CDKL3	1.10.510.10	133644327	133702213	3.30.200.20	133644327	133702213
Q16878	-	HGNC1795	5	CDO1	2.60.120.10	115141132	115152093
O14646	-	HGNC1915	5	CHD1	2.40.50.40	98233995	98236571
Q14677	-	HGNC23186	5	CLINT1	1.25.40.90	157240089	157285977
Q9Y5P4	-	HGNC2205	5	COL4A3BP	2.30.29.30	74807065	74807599
P07333	-	HGNC2433	5	CSF1R	1.10.510.10	149433784	149447791	3.30.200.20	149433784	149447791
P04141	+	HGNC2434	5	CSF2	1.20.1250.10	131409568	131411542
Q9Y6M4	+	HGNC2456	5	CSNK1G3	1.10.510.10	122881457	122927108	3.30.200.20	122881457	122927108
P35221	+	HGNC2509	5	CTNNA1	1.20.120.230	138221967	138261093
O95715	-	HGNC10640	5	CXCL14	2.40.50.40	134907545	134914226
Q9UJV9	-	HGNC18674	5	DDX41	3.40.50.300	176939121	176940379
P00374	-	HGNC2861	5	DHFR	3.40.430.10	79924908	79950304
Q9UNQ2	-	HGNC30217	5	DIMT1	3.40.50.150	61684839	61699161
Q9NRR4	-	HGNC17904	5	DROSHA	3.30.160.20	31401652	31409241
P52803	-	HGNC3225	5	EFNA5	2.60.40.420	106723005	107006232
Q9NZ08	-	HGNC18173	5	ERAP1	2.60.40.1730	96112108	96139520
Q96RT1	+	HGNC15842	5	ERBB2IP	2.30.42.10	65371014	65374334
P62495	-	HGNC3477	5	ETF1	3.30.1330.30	137843996	137878606	3.30.420.60	137843996	137878606	3.30.960.10	137843996	137878606
P51161	+	HGNC3561	5	FABP6	2.40.128.20	159626117	159659274
Q9UKT5	+	HGNC13583	5	FBXO4	3.40.50.300	41925574	41941380
P16591	+	HGNC3655	5	FER	3.30.505.10	108290457	108373137
P05230	-	HGNC3665	5	FGF1	2.80.10.50	141974857	141993691
O15520	-	HGNC3666	5	FGF10	2.80.10.50	44305099	44388594
P19883	+	HGNC3971	5	FST	3.30.60.30	52778712	52781056
Q8N4E7	+	HGNC17345	5	FTMT	1.20.1260.10	121187839	121188384
O15117	-	HGNC4036	5	FYB	2.30.30.40	39134419	39137790	2.30.30.40	39119093	39126127
Q13283	+	HGNC30292	5	G3BP1	3.10.450.50	151166182	151173785
Q86SR1	+	HGNC19873	5	GALNT10	2.80.10.50	153570544	153796529
P39905	-	HGNC4232	5	GDNF	2.10.90.10	37815806	37816108
P10912	+	HGNC4263	5	GHR	2.60.40.10	42566031	42711458
P35754	-	HGNC4330	5	GLRX	3.40.30.10	95152219	95158365
P17900	+	HGNC4367	5	GM2A	2.70.220.10	150639328	150647009
P46926	-	HGNC4417	5	GNPDA1	3.40.50.1360	141381596	141391599
Q9H4A6	-	HGNC15452	5	GOLPH3	1.10.3630.10	32126320	32173986
P22352	+	HGNC4555	5	GPX3	3.40.30.10	150400288	150407679
Q8TED1	+	HGNC33100	5	GPX8	3.40.30.10	54456132	54460043
P43250	+	HGNC4545	5	GRK6	1.10.510.10	176853847	176868786	3.30.200.20	176853847	176868786
Q13888	-	HGNC4656	5	GTF2H2	3.30.40.10	70331533	70337394
O75367	-	HGNC4740	5	H2AFY	1.10.20.10	134705212	134724782	3.40.220.10	134670668	134696293
Q99075	-	HGNC3059	5	HBEGF	2.10.25.10	139715569	139725498
O15379	-	HGNC4854	5	HDAC3	3.40.800.20	141004863	141016356
P07686	+	HGNC4879	5	HEXB	3.20.20.80	73981209	74016997	3.30.379.10	73981209	74016997
P49773	-	HGNC4912	5	HINT1	3.30.428.10	130495142	130500897
P52790	-	HGNC4925	5	HK3	3.30.420.40	176308079	176314613	3.40.367.20	176308079	176314613
P04035	+	HGNC5006	5	HMGCR	1.10.3270.10	74647335	74656164	3.30.70.420	74647335	74656164	3.90.770.10	74647335	74656164
Q99729	+	HGNC5034	5	HNRNPAB	3.30.70.330	177632013	177633786
P31943	-	HGNC5041	5	HNRNPH1	3.30.70.330	179047956	179050115
P51659	+	HGNC5213	5	HSD17B4	3.10.129.10	118832321	118865666	3.30.1050.10	118865673	118877686	3.40.50.720	118788271	118832281
P38646	-	HGNC5244	5	HSPA9	2.60.34.10	137892492	137895647
P08700	+	HGNC6011	5	IL3	1.20.1250.10	131396499	131398457
P05112	+	HGNC6014	5	IL4	1.20.1250.10	132009815	132018276
P05113	-	HGNC6016	5	IL5	1.20.1250.10	131877505	131879103
P40189	-	HGNC6021	5	IL6ST	2.60.40.10	55253093	55265680
P16871	+	HGNC6024	5	IL7R	2.60.40.10	35857140	35874561
P29460	-	HGNC5970	5	IL12B	2.60.40.10	158743695	158753723
P35225	+	HGNC5973	5	IL13	1.20.1250.10	131993981	131995971
P56199	+	HGNC6134	5	ITGA1	3.40.50.410	52160916	52193293
P17301	+	HGNC6137	5	ITGA2	3.40.50.410	52344304	52353859
Q08881	+	HGNC6171	5	ITK	1.10.510.10	156668730	156679685	2.30.30.40	156644906	156659353	3.30.200.20	156668730	156679685	4.10.1130.10	156641213	156649884
Q9NZI2	+	HGNC15521	5	KCNIP1	1.10.238.10	170145842	170162765
O00139	+	HGNC6318	5	KIF2A	3.40.850.10	61648537	61668277
Q9P2J5	-	HGNC6512	5	LARS	3.90.740.10	145524248	145537351
P20700	+	HGNC6637	5	LMNB1	2.60.40.1260	126156717	126168448
Q16873	+	HGNC6719	5	LTC4S	1.20.120.550	179221082	179223392
P45984	-	HGNC6886	5	MAPK9	1.10.510.10	179665371	179707560	3.30.200.20	179665371	179707560
O96007	-	HGNC7193	5	MOCS2	3.90.1170.40	52394482	52398040
Q9UBF9	+	HGNC12399	5	MYOT	2.60.40.10	137217723	137222924
Q13075	-	HGNC7634	5	NAIP	1.10.1170.10	70299620	70308321
P52848	+	HGNC7680	5	NDST1	3.40.50.300	149919749	149932891
O43678	-	HGNC7685	5	NDUFA2	3.40.30.10	140025174	140027167
Q13423	+	HGNC7863	5	NNT	3.40.50.1220	43675616	43704503
P06748	+	HGNC7910	5	NPM1	2.60.120.340	170814977	170819727
P04150	-	HGNC7978	5	NR3C1	1.10.565.10	142661459	142680301	3.30.50.10	142680281	142693668
P55809	-	HGNC8527	5	OXCT1	3.40.1080.10	41731833	41862812
Q9H074	-	HGNC16945	5	PAIP1	1.25.40.180	43535032	43547981
O75340	+	HGNC8765	5	PDCD6	1.10.238.10	271893	314627
Q08499	-	HGNC8783	5	PDE4D	1.10.1300.10	58287829	58289237	1.10.1300.10	58270661	58287768
Q9BRX2	+	HGNC8829	5	PELO	3.30.1330.30	52097297	52097629
P27986	+	HGNC8979	5	PIK3R1	1.10.555.10	67522816	67588127	2.30.30.40	67522504	67522752	3.30.505.10	67588131	67593426
Q9UBT6	+	HGNC9183	5	POLK	3.30.1490.100	74848363	74892096	3.30.70.270	74848363	74892096
P45877	-	HGNC9256	5	PPIC	2.40.100.10	122359572	122372250
P67775	-	HGNC9299	5	PPP2CA	3.60.21.10	133533465	133561551
Q96BP3	+	HGNC28954	5	PPWD1	2.40.100.10	64878931	64883220
P16471	-	HGNC9446	5	PRLR	2.60.40.10	35068960	35086439
O60671	-	HGNC9806	5	RAD1	3.70.10.10	34908872	34914996
P20936	+	HGNC9871	5	RASA1	1.10.506.10	86672338	86686697	2.30.30.40	86629096	86637112
Q9NW64	-	HGNC25503	5	RBM22	3.30.70.330	150072868	150075134
O43566	+	HGNC9996	5	RGS14	1.10.167.10	176793276	176794552	1.10.196.10	176793276	176794552
Q96T51	+	HGNC19760	5	RUFY1	3.30.40.10	179032899	179036517
O95486	+	HGNC10703	5	SEC24A	2.60.40.1670	134010777	134060781	3.40.50.410	134010777	134060781
P63208	-	HGNC10899	5	SKP1	3.30.710.10	133493426	133509712
Q13309	+	HGNC10901	5	SKP2	1.20.1280.50	36153129	36166651	3.80.10.10	36153129	36182130
Q16637	+	HGNC11117	5	SMN1	2.30.30.140	70237306	70238577
Q16637	+	HGNC11118	5	SMN2	2.30.30.140	69361882	69363153
P09486	-	HGNC11219	5	SPARC	1.10.238.10	151043134	151052689	3.30.60.30	151043134	151052689
P00995	-	HGNC11244	5	SPINK1	3.30.60.30	147204226	147209178
Q9NQ38	+	HGNC15464	5	SPINK5	3.30.60.30	147444921	147451732	3.30.60.30	147478852	147480966	3.30.60.30	147506553	147513366
P58062	+	HGNC24643	5	SPINK7	3.30.60.30	147692104	147695244
Q13501	+	HGNC11280	5	SQSTM1	1.10.8.10	179260776	179263578
P09132	+	HGNC11300	5	SRP19	3.30.56.30	112197074	112203159
O94804	-	HGNC11388	5	STK10	1.10.510.10	171523483	171614994	3.30.200.20	171523483	171614994
P53999	+	HGNC19985	5	SUB1	2.30.31.10	32591783	32601187
P26639	+	HGNC11572	5	TARS	3.10.20.30	33448743	33453424
O75347	-	HGNC11579	5	TBCA	1.20.58.90	76987245	77072077
O14776	+	HGNC15630	5	TCERG1	1.10.10.440	145862243	145878213	1.10.10.440	145883501	145886737
Q15582	+	HGNC11771	5	TGFBI	2.30.180.10	135391462	135396618
Q92973	+	HGNC6401	5	TNPO1	1.25.10.10	72144221	72201234
O75962	+	HGNC12303	5	TRIO	1.20.900.10	14387925	14406022	2.30.29.30	14387925	14406022
P63146	+	HGNC12473	5	UBE2B	3.10.110.10	133707287	133726041
P62837	+	HGNC12475	5	UBE2D2	3.10.110.10	138941377	139006383
Q8WUN7	-	HGNC24463	5	UBTD2	3.10.20.90	171638836	171639153
Q8IX03	+	HGNC29435	5	WWC1	2.60.40.150	167855139	167868761
Q13426	+	HGNC12831	5	XRCC4	1.20.5.370	82400739	82500634	2.170.210.10	82400739	82500634
Q7Z3T8	+	HGNC20756	5	ZFYVE16	3.30.40.10	79734701	79738982
Q9BWD1	+	HGNC94	6	ACAT2	3.40.47.10	160183120	160199858
Q9NPJ3	+	HGNC20999	6	ACOT13	3.10.129.10	24667492	24701840
Q7Z6V5	-	HGNC21172	6	ADAT2	3.40.140.10	143749620	143771737
Q15109	-	HGNC320	6	AGER	2.60.40.10	32149392	32151749
Q8N157	-	HGNC21575	6	AHI1	2.30.30.40	135639734	135679292
Q9Y4K1	+	HGNC356	6	AIM1	2.60.20.10	106973050	106975342
P51649	+	HGNC408	6	ALDH5A1	3.40.309.10	24495369	24533898	3.40.605.10	24495369	24533898
P17707	+	HGNC457	6	AMD1	3.30.360.50	111196309	111210063	3.60.90.10	111196309	111214816
Q92625	+	HGNC20961	6	ANKS1A	1.10.150.50	35021936	35047319
O95445	+	HGNC13916	6	APOM	2.40.128.20	31623807	31625863
P05089	+	HGNC663	6	ARG1	3.40.800.10	131894423	131905021
Q8NFD5	+	HGNC18040	6	ARID1B	1.10.150.60	157495237	157505496
Q9Y294	+	HGNC20995	6	ASF1A	2.60.40.1490	119215578	119228680
Q9NPZ5	-	HGNC922	6	B3GAT2	3.90.550.10	71571368	71665900
Q9BYV9	-	HGNC14078	6	BACH2	3.30.710.10	90661437	90718538
P46379	-	HGNC13919	6	BAG6	3.10.20.90	31617095	31619539
Q16611	-	HGNC949	6	BAK1	1.10.437.10	33541645	33545335
P21953	+	HGNC987	6	BCKDHB	3.40.50.920	80816561	81053518	3.40.50.970	80816561	81053518
P22004	+	HGNC1073	6	BMP6	2.10.90.10	7862671	7880573
Q86WA6	+	HGNC1094	6	BPHL	3.40.50.1820	3123895	3152806
P25440	+	HGNC1103	6	BRD2	1.20.920.10	32944543	32945569	1.20.920.10	32942408	32943936
Q9ULD4	+	HGNC14256	6	BRPF3	2.30.30.160	36190027	36198353
P0C0L4	+	HGNC1323	6	C4A	1.50.10.20	31962896	31964980
P30281	-	HGNC1585	6	CCND3	1.10.472.10	41903680	41909386
Q9Y5K6	+	HGNC14258	6	CD2AP	2.30.30.40	47445981	47501358	2.30.30.40	47512347	47522465
Q9Y232	+	HGNC1811	6	CDYL	1.10.12.10	4935907	4954287	3.90.226.10	4935907	4954287
P00751	+	HGNC1037	6	CFB	2.40.10.10	31910777	31915747	3.40.50.410	31907097	31915747
P01215	-	HGNC1885	6	CGA	2.10.90.10	87795985	87797845
O00299	-	HGNC2062	6	CLIC1	1.20.1050.10	31698621	31704076	3.40.30.10	31698621	31704076
P20849	-	HGNC2217	6	COL9A1	2.60.120.200	70991164	71011721
Q03692	-	HGNC2185	6	COL10A1	2.60.120.40	116441238	116441717
P67870	+	HGNC2460	6	CSNK2B	1.10.1820.10	31633225	31637643	2.20.25.20	31633225	31637643
Q14999	-	HGNC21024	6	CUL7	2.30.30.30	43018810	43019112
O60888	-	HGNC21101	6	CUTA	3.30.70.830	33384486	33385961
Q7L1T6	+	HGNC20147	6	CYB5R4	3.10.120.10	84573969	84618808
Q9UHG0	-	HGNC18141	6	DCDC2	3.10.20.230	24291185	24302226
Q08345	+	HGNC2730	6	DDR1	2.60.120.260	30856591	30860846
Q13838	-	HGNC13917	6	DDX39B	3.40.50.300	31498213	31508209	3.40.50.300	31498213	31508179
P35659	-	HGNC2768	6	DEK	1.10.10.60	18225952	18236804
P15924	+	HGNC3052	6	DSP	3.90.1290.10	7584120	7584863	3.90.1290.10	7585320	7585961
Q9NRW4	+	HGNC16077	6	DUSP22	3.90.190.10	292540	348822
O75521	-	HGNC14601	6	ECI2	1.10.12.10	4116110	4130694	3.90.226.10	4116110	4130694
Q96KQ7	-	HGNC14129	6	EHMT2	2.170.270.10	31847983	31852271
Q15375	-	HGNC3390	6	EPHA7	1.10.150.50	93953170	93955142	1.10.510.10	93956538	93973607	2.60.120.260	94120438	94128965	3.30.200.20	93956538	93973607
P03372	+	HGNC3467	6	ESR1	1.10.565.10	152265436	152420098	3.30.50.10	152163817	152265333
P15311	-	HGNC12691	6	EZR	1.20.80.10	159192343	159239121	2.30.29.30	159192343	159239121	3.10.20.90	159192343	159239121
P00488	-	HGNC3531	6	F13A1	2.60.40.10	6145854	6318893	3.90.260.10	6145854	6318893
O15540	+	HGNC3562	6	FABP7	2.40.128.20	123100943	123104909
Q13451	-	HGNC3721	6	FKBP5	1.25.40.10	35543614	35610600	3.10.50.40	35543614	35610600
P06241	-	HGNC4037	6	FYN	1.10.510.10	111982944	112021387	2.30.30.40	112021430	112041037	3.30.200.20	111982944	112021387	3.30.505.10	112021430	112041010
Q04760	-	HGNC4323	6	GLO1	3.10.180.10	38645073	38670826
O60547	-	HGNC4369	6	GMDS	3.40.50.720	1624406	2245589	3.90.25.10	1624406	2245589
O75496	+	HGNC17493	6	GMNN	1.20.5.1180	24781783	24784770
P36959	+	HGNC4376	6	GMPR	3.20.20.70	16238925	16295414
Q14749	+	HGNC4415	6	GNMT	3.30.46.10	42928509	42931441	3.40.50.150	42928509	42931441
Q9HD26	-	HGNC17643	6	GOPC	2.30.42.10	117888164	117892078
O75715	+	HGNC4557	6	GPX5	3.40.30.10	28493872	28501938
Q13002	+	HGNC4580	6	GRIK2	3.40.190.10	102376421	102503311
P08263	-	HGNC4626	6	GSTA1	1.20.1050.10	52656658	52664064	3.40.30.10	52656658	52664064
P09210	-	HGNC4627	6	GSTA2	1.20.1050.10	52615377	52622744	3.40.30.10	52615377	52622744
Q16772	-	HGNC4628	6	GSTA3	1.20.1050.10	52761606	52770631	3.40.30.10	52761606	52770631
O15217	-	HGNC4629	6	GSTA4	1.20.1050.10	52843270	52859040	3.40.30.10	52843270	52859040
Q6ZYL4	+	HGNC21157	6	GTF2H5	3.30.70.1220	158591536	158613186
Q92769	-	HGNC4853	6	HDAC2	3.40.800.20	114265543	114292047
Q7Z4H3	-	HGNC21078	6	HDDC2	1.10.3210.10	125597294	125623077
Q30201	+	HGNC4886	6	HFE	2.60.40.10	26087735	26093187	3.30.500.10	26087735	26093187
P15822	+	HGNC4920	6	HIVEP1	3.30.160.60	12131049	12136067
P01891	+	HGNC4931	6	HLA-A	3.30.500.10	29910403	29912161
P01889	-	HGNC4932	6	HLA-B	3.30.500.10	2669453	2671317
P04222	-	HGNC4933	6	HLA-C	3.30.500.10	31237851	31239775
P28067	-	HGNC4934	6	HLA-DMA	2.60.40.10	32917141	32920734	3.10.320.10	32917141	32920734
P28068	-	HGNC4935	6	HLA-DMB	3.10.320.10	32903418	32908529
P13765	-	HGNC4937	6	HLA-DOB	2.60.40.10	32781599	32784640	3.10.320.10	32781599	32784640
P20036	-	HGNC4938	6	HLA-DPA1	2.60.40.10	33036573	33041253	3.10.320.10	33036573	33041253
P04440	+	HGNC4940	6	HLA-DPB1	2.60.40.10	33043915	33053563	3.10.320.10	33043915	33053563
P01909	+	HGNC4942	6	HLA-DQA1	3.10.320.10	32609236	32610391
P01920	-	HGNC4944	6	HLA-DQB1	2.60.40.10	32629205	32634287	3.10.320.10	32629205	32634287
P01903	+	HGNC4947	6	HLA-DRA	2.60.40.10	32407803	32411543	3.10.320.10	32407803	32411570
P01911	-	HGNC4948	6	HLA-DRB1	2.60.40.10	3776150	3787357	3.10.320.10	3776150	3787357
P79483	-	HGNC4951	6	HLA-DRB3	2.60.40.10	3935859	3947067	3.10.320.10	3935859	3947067
Q30154	-	HGNC4953	6	HLA-DRB5	2.60.40.10	32486438	32497913	3.10.320.10	32486438	32497913
P13747	+	HGNC4962	6	HLA-E	2.60.40.10	30457372	30459188	3.30.500.10	30457372	30459188
P17693	+	HGNC4964	6	HLA-G	2.60.40.10	29795826	29797469	3.30.500.10	29795694	29797597
Q8IZT8	-	HGNC19419	6	HS3ST5	3.40.50.300	114378423	114379199
Q92506	+	HGNC3554	6	HSD17B8	3.40.50.720	33172461	33174428
P08238	+	HGNC5258	6	HSP90AB1	3.30.565.10	44216367	44218048
P34931	-	HGNC5234	6	HSPA1L	3.30.30.30	31778591	31779748	3.30.420.40	31778591	31779748	3.90.640.10	31778591	31779748
P15260	-	HGNC5439	6	IFNGR1	2.60.40.10	137522140	137540412
P11717	+	HGNC5467	6	IGF2R	2.70.130.10	160493020	160499313
Q96PD4	-	HGNC16404	6	IL17F	2.10.90.10	52101731	52103690
Q15306	+	HGNC6119	6	IRF4	1.10.10.10	393219	394994
Q5VV43	-	HGNC21580	6	KIAA0319	2.60.40.670	24580173	24588829
Q9BW19	+	HGNC6389	6	KIFC1	3.40.850.10	33372791	33377434
Q96JM7	+	HGNC23035	6	L3MBTL3	2.30.30.160	130378565	130415462
Q6ZN17	+	HGNC32207	6	LIN28B	2.40.50.140	105406033	105474307
P01374	+	HGNC6709	6	LTA	2.60.120.40	31540789	31541467
O95711	+	HGNC16837	6	LY86	2.60.40.770	6589028	6654857
Q99683	-	HGNC6857	6	MAP3K5	1.10.510.10	136922943	136958503	3.30.200.20	136922943	136958503
O43318	-	HGNC6859	6	MAP3K7	1.10.510.10	91260226	91296511	3.30.200.20	91260226	91296511
O15264	+	HGNC6875	6	MAPK13	1.10.510.10	36098363	36107108	3.30.200.20	36098363	36107108
Q16539	+	HGNC6876	6	MAPK14	1.10.510.10	35995935	36076221	3.30.200.20	35995935	36076221
Q14676	-	HGNC21163	6	MDC1	2.60.200.20	30681682	30682897	3.40.50.10190	30668244	30671229
P48163	-	HGNC6983	6	ME1	3.40.50.10380	83921669	84140636	3.40.50.720	83921669	84140636
Q29983	+	HGNC7090	6	MICA	2.60.40.10	31371479	31380001	3.30.500.10	31371479	31380001
Q8TDZ2	-	HGNC20619	6	MICAL1	1.10.418.10	109769424	109770070
Q29980	+	HGNC7091	6	MICB	2.60.40.10	31466040	31475076	3.30.500.10	31466040	31475307
P55196	+	HGNC7137	6	MLLT4	2.30.42.10	168325694	168344690
P22033	-	HGNC7526	6	MUT	3.20.20.240	49399443	49427145	3.40.50.280	49399443	49427145
Q8WY64	+	HGNC21155	6	MYLIP	3.30.40.10	16145405	16146979
Q86YV6	-	HGNC27972	6	MYLK4	1.10.510.10	2671537	2749410	3.30.200.20	2671537	2749410
O95944	+	HGNC6732	6	NCR2	2.60.40.10	41303827	41304162
O14931	-	HGNC19077	6	NCR3	2.60.40.10	31557393	31557891
P18615	-	HGNC13974	6	NELFE	3.30.70.330	31921521	31922343
P16083	+	HGNC7856	6	NQO2	3.40.50.360	3006790	3019886
O95989	-	HGNC8050	6	NUDT3	3.90.79.10	34256532	34360138
Q9Y530	-	HGNC21257	6	OARD1	3.40.220.10	41035076	41039366
O60260	-	HGNC8607	6	PARK2	3.10.20.90	162683740	163148699
P22061	+	HGNC8728	6	PCMT1	3.40.50.150	150070867	150123338
Q9Y233	-	HGNC8772	6	PDE10A	1.10.1300.10	165746546	165809932	3.30.450.40	165809945	165844917
P20142	-	HGNC8890	6	PGC	2.40.70.10	41704592	41712427
O43189	+	HGNC8919	6	PHF1	2.30.30.140	33380122	33380488
Q8WWQ0	-	HGNC15673	6	PHIP	1.20.920.10	79656495	79664679
P11309	+	HGNC8986	6	PIM1	1.10.510.10	37138195	37140946	3.30.200.20	37138198	37140946
P00747	+	HGNC9071	6	PLG	2.40.10.10	161155120	161174090	2.40.20.10	161132114	161139830	2.40.20.10	161143463	161152209
P26678	+	HGNC9080	6	PLN	1.20.5.290	118880085	118880240
Q03181	+	HGNC9235	6	PPARD	1.10.565.10	35391791	35393853
Q9Y3C6	-	HGNC9260	6	PPIL1	2.40.100.10	36823591	36842547
Q9UMR5	+	HGNC9326	6	PPT2	3.40.50.1820	32121404	32130706
P48147	-	HGNC9358	6	PREP	2.130.10.120	105726021	105850762	3.40.50.1820	105726021	105850762
P01236	-	HGNC9445	6	PRL	1.20.1250.10	22287633	22294756
Q6ISU1	+	HGNC21290	6	PTCRA	2.60.40.10	42883856	42891992
Q93096	+	HGNC9634	6	PTP4A1	3.90.190.10	64286786	64290076
Q15262	-	HGNC9674	6	PTPRK	3.90.190.10	128304068	128319950
Q13546	+	HGNC10019	6	RIPK1	1.10.510.10	3077058	3089858	3.30.200.20	3077058	3089858
O00584	-	HGNC21686	6	RNASET2	3.90.730.10	167343078	167369597
O76064	+	HGNC10071	6	RNF8	2.60.200.20	37321962	37336457
O60942	-	HGNC10073	6	RNGTT	3.90.190.10	89614460	89673127
Q9NQL2	-	HGNC19903	6	RRAGD	3.40.50.300	90088984	90097279
Q9H446	+	HGNC20993	6	RWDD1	3.10.110.10	116892746	116910097
Q9UIY3	+	HGNC21385	6	RWDD2A	3.10.110.10	83904171	83905535
P28702	-	HGNC10478	6	RXRB	1.10.565.10	33162473	33164311
Q9UPN6	+	HGNC20959	6	SCAF8	1.25.40.90	155054557	155109048
P30740	-	HGNC3311	6	SERPINB1	2.30.39.10	2833844	2840819	3.30.497.10	2833844	2840819
O00141	-	HGNC10810	6	SGK1	1.10.510.10	134492190	134583177	3.30.200.20	134492190	134583177
Q9NXA8	+	HGNC14933	6	SIRT5	3.40.50.1220	13584442	13612070
P04179	-	HGNC11180	6	SOD2	1.10.287.990	160103527	160113845
O95238	-	HGNC17257	6	SPDEF	1.10.10.10	34506053	34507116
P11831	+	HGNC11291	6	SRF	3.40.1810.10	43139788	43141776
Q96SB4	-	HGNC11305	6	SRPK1	1.10.510.10	35803083	35858740	3.30.200.20	35803083	35858740
Q15544	-	HGNC11544	6	TAF11	1.10.20.10	34846399	34848136
Q03518	-	HGNC43	6	TAP1	3.40.50.300	32813358	32816529
P20226	+	HGNC11588	6	TBP	3.30.310.10	170871290	170881350
P01375	+	HGNC11892	6	TNF	2.60.120.40	31544353	31545311
P22105	-	HGNC11976	6	TNXB	2.60.40.10	32010814	32011330
Q9NP99	-	HGNC17760	6	TREM1	2.60.40.10	41248880	41254344
Q86YW5	-	HGNC20434	6	TREML1	2.60.40.10	41121496	41121813
P33981	+	HGNC12401	6	TTK	1.10.510.10	80741190	80751916	1.25.40.10	80717549	80721167	3.30.200.20	80741190	80751916
O00294	-	HGNC12423	6	TULP1	3.20.90.10	35466106	35473910
Q8NBS9	-	HGNC21073	6	TXNDC5	3.40.30.10	7883379	7886272
Q9BZM4	-	HGNC14895	6	ULBP3	3.30.500.10	150386540	150390114
P46939	+	HGNC12635	6	UTRN	1.10.418.10	144724270	144750805
P15692	+	HGNC12680	6	VEGFA	2.10.160.10	43738981	43745243	2.10.90.10	43738522	43738863
P22303	-	HGNC108	7	ACHE	3.40.50.1820	100488590	100491759
Q9P0K1	+	HGNC201	7	ADAM22	3.40.390.10	87757935	87797468	4.10.70.10	87757935	87797468
Q96P47	+	HGNC16923	7	AGAP3	3.40.50.300	150784096	150815355
Q8TD06	-	HGNC24167	7	AGR3	3.40.30.10	16899208	16918172
Q96HN2	+	HGNC22204	7	AHCYL2	3.40.50.1480	129028944	129066396	3.40.50.720	129028944	129066396
P15121	-	HGNC381	7	AKR1B1	3.20.20.100	134127482	134143810
O60218	+	HGNC382	7	AKR1B10	3.20.20.100	134212664	134225838
P51857	+	HGNC388	7	AKR1D1	3.20.20.100	137761265	137801405
P49418	-	HGNC471	7	AMPH	1.20.1270.60	38505107	38574580
Q9NQW6	+	HGNC14082	7	ANLN	2.30.29.30	36478867	36492173
P19801	+	HGNC80	7	AOC1	2.70.98.20	150553619	150558294	3.10.450.40	150553619	150558294
P29972	+	HGNC633	7	AQP1	1.20.1080.10	30893010	30951800
P84085	+	HGNC658	7	ARF5	3.40.50.300	127228574	127231350
P04424	+	HGNC746	7	ASL	1.10.275.10	65541069	65557896	1.10.40.30	65541069	65557896	1.20.200.10	65541069	65557896
P25311	-	HGNC910	7	AZGP1	2.60.40.10	99564628	99573582	3.30.500.10	99564628	99573582
Q9UHR4	-	HGNC21649	7	BAIAP2L1	2.30.30.40	97935785	97937148
Q9UIG0	-	HGNC961	7	BAZ1B	3.30.40.10	72863894	72865203
P53004	+	HGNC1062	7	BLVRA	3.30.360.10	43827509	43846831	3.40.50.720	43827509	43846831
P07738	+	HGNC1093	7	BPGM	3.40.50.1240	134346260	134363780
P15056	-	HGNC1097	7	BRAF	1.10.510.10	140434516	140482840	3.10.20.90	140507759	140534467	3.30.200.20	140434516	140482840
Q13554	-	HGNC1461	7	CAMK2B	1.10.510.10	44280342	44364989	3.30.200.20	44280342	44364989
P42575	+	HGNC1503	7	CASP2	3.30.70.1470	143000951	143002161	3.40.50.1460	142991346	143000908
Q13185	+	HGNC1553	7	CBX3	2.40.50.40	26248173	26251795	2.40.50.40	26246048	26248103
O00175	-	HGNC10623	7	CCL24	2.40.50.40	75441176	75442735
Q00535	-	HGNC1774	7	CDK5	1.10.510.10	150751098	150754934	3.30.200.20	150751098	150754934
Q00534	-	HGNC1777	7	CDK6	1.10.510.10	92244456	92462636	3.30.200.20	92244456	92462636
P13569	+	HGNC1884	7	CFTR	2.40.50.100	117307019	117307117	2.40.50.100	117307133	117307150	2.40.50.140	117307019	117307117	2.40.50.140	117307133	117307150	3.40.50.300	117307019	117307117	3.40.50.300	117307133	117307150	3.40.50.300	117182076	117232255
P52757	+	HGNC1944	7	CHN2	1.10.555.10	29186218	29548966	3.30.505.10	29186218	29548966	3.30.60.20	29186218	29548966
O95628	-	HGNC7880	7	CNOT4	3.30.40.10	135107042	135123078
P15085	+	HGNC2296	7	CPA1	3.40.630.10	130021657	130027846
P48052	+	HGNC2297	7	CPA2	3.30.70.340	129906776	129909643	3.40.630.10	129917702	129929584
Q13616	+	HGNC2551	7	CUL1	1.10.10.10	148427263	148497671	1.20.1310.10	148427257	148497671	4.10.1030.10	148427263	148497671
P99999	-	HGNC19986	7	CYCS	1.10.760.10	25163322	25163734
P08684	-	HGNC2637	7	CYP3A4	1.10.630.10	99355758	99381637
Q16850	-	HGNC2649	7	CYP51A1	1.10.630.10	91743002	91763518
Q9UJU6	+	HGNC2696	7	DBNL	3.40.20.10	44084337	44096427
P20711	-	HGNC2719	7	DDC	1.20.1340.10	50530931	50611782	3.40.640.10	50530931	50611782	3.90.1150.10	50530931	50611782
P09622	+	HGNC2898	7	DLD	3.30.390.30	107533711	107559701	3.50.50.60	107533711	107559701
Q96LL9	-	HGNC16410	7	DNAJC30	1.10.287.110	73097381	73097638
P42658	+	HGNC3010	7	DPP6	2.140.10.30	154172044	154684139	3.40.50.1820	154172044	154684139
P00533	+	HGNC3236	7	EGFR	1.10.510.10	55240761	55269000	2.10.220.10	55087043	55240682	3.30.200.20	55240761	55269000	3.80.20.20	55087043	55240682	4.10.1140.10	55240761	55241715
P55884	+	HGNC3280	7	EIF3B	3.30.70.330	2400353	2402714
Q92556	-	HGNC16286	7	ELMO1	2.30.29.30	36895158	36934465
P21709	-	HGNC3385	7	EPHA1	1.10.150.50	143088558	143088833
P54760	-	HGNC3395	7	EPHB4	1.10.150.50	100401115	100402935	1.10.510.10	100402924	100410794	2.60.120.260	100420112	100424603	2.60.40.10	100414814	100416263	3.30.200.20	100402924	100410794
P01588	+	HGNC3415	7	EPO	1.20.1250.10	100319249	100320753
P50549	-	HGNC3490	7	ETV1	1.10.10.10	13935637	13946188
Q6PIW4	-	HGNC13286	7	FIGNL1	1.10.8.60	50512963	50513964	3.40.50.300	50512963	50513964
Q9Y3D6	-	HGNC21689	7	FIS1	1.25.40.10	100883176	100888284
O75344	+	HGNC3722	7	FKBP6	3.10.50.40	72742465	72744319
Q9NWM8	-	HGNC18625	7	FKBP14	3.10.50.40	30058674	30066069
Q14315	+	HGNC3756	7	FLNC	2.60.40.10	128490483	128491329	2.60.40.10	128494643	128495362	2.60.40.10	128496897	128498078	2.60.40.10	128498178	128498574
Q16658	+	HGNC11148	7	FSCN1	2.80.10.50	5632568	5645102
P41250	+	HGNC4162	7	GARS	3.30.930.10	30634700	30673473	3.40.50.800	30634700	30673473
P35557	-	HGNC4195	7	GCK	3.30.420.40	44184740	44198685	3.40.367.20	44184740	44198718
O75223	-	HGNC21705	7	GGCT	3.10.490.10	30536710	30544324
P63096	+	HGNC4384	7	GNAI1	1.10.400.10	79764552	79846806	3.40.50.300	79764477	79846806
Q13322	-	HGNC4564	7	GRB10	3.10.20.90	50674060	50737432	3.30.505.10	50660660	50671779
Q9Y2Q3	+	HGNC16906	7	GSTK1	3.40.30.10	142960607	142964799
Q9UHL9	+	HGNC4661	7	GTF2IRD1	3.90.1460.10	73960100	73969537
P08236	-	HGNC4696	7	GUSB	2.60.120.260	65425940	65447109	2.60.40.320	65425940	65447109	3.20.20.80	65425940	65447109
O60381	+	HGNC23200	7	HBP1	1.10.30.10	106836451	106840698
Q9BSE4	-	HGNC21915	7	HERPUD2	3.10.20.90	35709908	35733915
P14210	-	HGNC4893	7	HGF	2.40.10.10	81331899	81339520	2.40.20.10	81359093	81399205	3.50.4.10	81359093	81399205
P31937	-	HGNC4907	7	HIBADH	1.10.1040.10	27565835	27689222	3.40.50.720	27565835	27689222
P22626	-	HGNC5033	7	HNRNPA2B1	3.30.70.330	26236628	26240196
P31271	-	HGNC5102	7	HOXA13	1.10.10.60	27237819	27238019
P08833	+	HGNC5469	7	IGFBP1	4.10.800.10	45930293	45932687
P20839	-	HGNC6052	7	IMPDH1	3.20.20.70	128034950	128049954
P08476	-	HGNC6066	7	INHBA	2.10.90.10	41729250	41729597
O95050	+	HGNC6069	7	INMT	3.40.50.150	30791767	30795464
Q8NA54	-	HGNC21995	7	IQUB	3.10.20.90	123143268	123152027
Q13568	+	HGNC6120	7	IRF5	2.60.200.10	128587496	128588758
Q12809	-	HGNC6251	7	KCNH2	3.30.450.20	150656726	150675000
Q6ZMT4	-	HGNC22224	7	KDM7A	3.30.40.10	139801924	139876736
P41159	+	HGNC6553	7	LEP	1.20.1250.10	127892135	127894813
Q9HBW1	-	HGNC15586	7	LRRC4	2.60.40.10	127669367	127669636
Q86UL8	-	HGNC18957	7	MAGI2	2.30.42.10	77708279	77756515
P40926	+	HGNC6971	7	MDH2	3.40.50.720	75677536	75695725	3.90.110.10	75677536	75695725
P08581	+	HGNC7029	7	MET	1.10.510.10	116415018	116436085	2.130.10.10	116339211	116398630	2.60.40.10	116339211	116398630	3.30.1680.10	116339211	116398630	3.30.200.20	116415018	116436085
P58546	-	HGNC15667	7	MTPN	1.25.40.20	135614676	135661847
P14598	+	HGNC7660	7	NCF1	2.30.30.40	74195181	74203017	3.30.1520.10	74188379	74195153
P29474	+	HGNC7876	7	NOS3	3.90.1230.10	150692328	150698679	3.90.340.10	150692328	150698679	3.90.440.10	150692328	150698679
Q96P11	-	HGNC16385	7	NSUN5	3.30.70.1170	72717525	72721591	3.40.50.150	72717525	72721591
P0CE72	+	HGNC8105	7	OCM	1.10.238.10	5920521	5925717
Q9H0J9	-	HGNC21919	7	PARP12	3.90.228.10	139724413	139728444
Q6ZW49	-	HGNC8624	7	PAXIP1	3.40.50.10190	154735861	154747312
Q15113	+	HGNC8738	7	PCOLCE	2.40.50.120	100204250	100205702
P13667	-	HGNC30167	7	PDIA4	3.40.30.10	148709064	148718170
Q16654	-	HGNC8812	7	PDK4	1.20.140.20	95214955	95225547	3.30.565.10	95214955	95225547
P48736	+	HGNC8978	7	PIK3CG	1.10.1070.11	106508436	106545829	1.25.40.70	106508436	106545829	2.60.40.150	106508436	106545829	3.10.20.90	106508436	106545829	3.30.1010.10	106508436	106545829
P12273	+	HGNC8993	7	PIP	2.60.40.10	142829294	142836732
P54278	-	HGNC9122	7	PMS2	3.30.230.10	6029479	6048649	3.30.565.10	6029479	6048649
Q9NP87	-	HGNC9185	7	POLM	3.40.50.10190	44120331	44121976
P16435	+	HGNC9208	7	POR	3.40.50.360	75583491	75610916
Q9NUX5	-	HGNC17284	7	POT1	2.40.50.140	124491977	124532427	2.40.50.210	124491977	124532427
P62937	+	HGNC9253	7	PPIA	2.40.100.10	44836324	44841018
P78330	-	HGNC9577	7	PSPH	1.10.150.210	56079457	56088904	3.40.50.1000	56079457	56088904
Q92932	-	HGNC9677	7	PTPRN2	3.90.190.10	157333425	157449101
P23471	+	HGNC9685	7	PTPRZ1	3.10.200.10	121568251	121624149
P63000	+	HGNC9801	7	RAC1	3.40.50.300	6414367	6442017
P11233	+	HGNC9839	7	RALA	3.40.50.300	39726291	39745772
Q15382	-	HGNC10011	7	RHEB	3.40.50.300	151164216	151216596
P35244	-	HGNC10291	7	RPA3	2.40.50.140	7676633	7680048
Q9Y3A5	-	HGNC19440	7	SBDS	3.30.1250.10	66453360	66460403
Q9Y6U3	+	HGNC21695	7	SCIN	3.40.20.10	12666260	12692337
P05121	+	HGNC8583	7	SERPINE1	2.30.39.10	100771744	100780720	3.30.497.10	100771744	100780720
Q15465	-	HGNC10848	7	SHH	3.30.1380.10	155596391	155604749
Q9HCE7	-	HGNC16807	7	SMURF1	2.60.40.150	98652471	98741366
Q7KZF4	+	HGNC30646	7	SND1	2.30.30.140	127714722	127732107	2.40.50.90	127714722	127732107
P30626	-	HGNC11292	7	SRI	1.10.238.10	87835795	87849340
P78362	-	HGNC11306	7	SRPK2	1.10.510.10	104758320	104844152	3.30.200.20	104758320	104844152
Q04837	+	HGNC11317	7	SSBP1	2.40.50.140	141441993	141450151
Q8NBJ7	+	HGNC20415	7	SUMF2	3.90.1580.10	56132026	56147390
Q9UGI8	+	HGNC14620	7	TES	2.10.110.10	115891997	115897533
O15164	+	HGNC11812	7	TRIM24	1.20.920.10	138264162	138269579	3.30.40.10	138264162	138269561
P62256	-	HGNC12484	7	UBE2H	3.10.110.10	129474848	129592394
Q16831	+	HGNC12576	7	UPP1	3.40.50.1580	48134381	48147951
P61981	-	HGNC12852	7	YWHAG	1.20.190.20	75958896	75988124
Q7Z2W4	-	HGNC23721	7	ZC3HAV1	3.90.228.10	138732360	138739967
Q9Y2L8	+	HGNC12867	7	ZKSCAN5	3.30.160.60	99123684	99123782
O15123	-	HGNC485	8	ANGPT2	3.90.215.10	6360624	6377473	4.10.530.10	6360624	6377473
P16157	-	HGNC492	8	ANK1	1.10.533.10	41543691	41547791	1.25.40.20	41559575	41577180
Q9Y6D6	-	HGNC15772	8	ARFGEF1	1.10.1000.11	68165716	68178292	1.10.220.20	68165716	68178292
Q9ULH1	-	HGNC2720	8	ASAP1	2.30.30.40	131066979	131070309
Q6PL18	-	HGNC30123	8	ATAD2	1.20.920.10	124346449	124349974
O95429	+	HGNC940	8	BAG4	1.20.58.120	38067709	38068008
P00915	-	HGNC1368	8	CA1	3.10.200.10	86240791	86253860
P00918	+	HGNC1373	8	CA2	3.10.200.10	86376311	86393015
P07451	+	HGNC1374	8	CA3	3.10.200.10	86351139	86360379
P35219	-	HGNC1382	8	CA8	3.10.200.10	61121346	61193705
Q9UIV1	-	HGNC14101	8	CNOT7	3.30.420.10	17088300	17102630
P06850	-	HGNC2355	8	CRH	1.20.5.480	67089130	67089252
P07858	-	HGNC2527	8	CTSB	1.20.5.170	11706622	11708463	3.90.70.10	11702654	11706615
P19099	-	HGNC2592	8	CYP11B2	1.10.630.10	143993398	143999156
O00399	+	HGNC16964	8	DCTN6	2.160.10.10	30013900	30040686
Q16698	+	HGNC2753	8	DECR1	3.40.50.720	91029385	91064122
O15263	+	HGNC2767	8	DEFB4A	3.10.360.10	7754007	7754129
O15263	-	HGNC30193	8	DEFB4B	3.10.360.10	7272485	7272607
P81534	-	HGNC15967	8	DEFB103A	3.10.360.10	7286508	7286642
P81534	+	HGNC31702	8	DEFB103B	3.10.360.10	7739953	7740087
Q96QB1	-	HGNC2897	8	DLC1	1.10.555.10	12948832	12952701
Q08495	+	HGNC3382	8	DMTN	1.10.950.10	21938624	21938971
O60496	-	HGNC2991	8	DOK2	2.30.29.30	21769742	21771111
Q14117	-	HGNC3013	8	DPYS	3.20.20.140	105393428	105479147
Q16555	+	HGNC3014	8	DPYSL2	2.30.40.10	26371878	26505190	3.20.20.140	26371878	26505190
Q13115	-	HGNC3070	8	DUSP4	3.90.190.10	29194719	29196017
Q9BV47	-	HGNC28161	8	DUSP26	3.90.190.10	33449533	33454852
P34913	+	HGNC3402	8	EPHX2	1.10.150.240	27348726	27402036	3.40.50.1000	27348726	27402036	3.40.50.1820	27348726	27402036
Q8IV48	+	HGNC23994	8	ERI1	3.30.420.10	8860574	8887541
Q9NPD3	+	HGNC18189	8	EXOSC4	3.30.230.70	145133635	145135501
Q01469	+	HGNC3560	8	FABP5	2.40.128.20	82192831	82196799
P37268	+	HGNC3629	8	FDFT1	1.10.600.10	11660432	11695974
Q9NP95	-	HGNC3677	8	FGF20	2.80.10.50	16850583	16859540
P11362	-	HGNC3688	8	FGFR1	1.10.510.10	38271498	38277061	2.60.40.10	38279393	38287235	3.30.200.20	38271498	38277061
P49354	+	HGNC3782	8	FNTA	1.25.40.120	42911490	42940422
P55040	-	HGNC4234	8	GEM	3.40.50.300	95262645	95272547
Q92820	-	HGNC4248	8	GGH	3.40.50.880	63927893	63951254
P00390	-	HGNC4623	8	GSR	3.30.390.30	30537039	30585219	3.50.50.60	30537039	30585219
P29084	-	HGNC4651	8	GTF2E2	1.10.10.10	30469926	30492610
Q14541	+	HGNC5026	8	HNF4G	1.10.565.10	76459871	76471163
P52758	-	HGNC16897	8	HRSP12	3.30.1330.40	99115072	99129320
Q00613	+	HGNC5224	8	HSF1	1.10.10.10	145515467	145533463
P29218	-	HGNC6050	8	IMPA1	3.30.540.10	82572814	82598149	3.40.190.80	82572814	82598149
Q92794	-	HGNC13013	8	KAT6A	3.30.60.60	41800394	41812922	3.40.630.30	41800394	41812922
Q9NQT8	-	HGNC14405	8	KIF13B	2.60.200.20	29006271	29018335	3.40.850.10	29024991	29120541
Q13118	-	HGNC11810	8	KLF10	3.30.160.60	103662533	103663484
P07948	+	HGNC6735	8	LYN	1.10.510.10	56866450	56922666	2.30.30.40	56860179	56863102	3.30.200.20	56866450	56922666
Q8NEM0	+	HGNC6954	8	MCPH1	3.40.50.10190	6264189	6289101	3.40.50.10190	6312753	6500567
P51512	-	HGNC7162	8	MMP16	3.40.390.10	89128942	89198738
P01106	+	HGNC7553	8	MYC	4.10.280.10	128752896	128753141
Q86SE8	+	HGNC7930	8	NPM2	2.60.120.340	21882799	21891621
Q02297	+	HGNC7997	8	NRG1	2.10.25.10	32585487	32611897
Q6ZVK8	-	HGNC26194	8	NUDT18	3.90.79.10	21965245	21966737
P11940	-	HGNC8554	8	PABPC1	1.10.1900.10	101716528	101718988	3.30.70.330	101727735	101733810
Q53GL7	-	HGNC25895	8	PARP10	3.30.70.330	145060024	145060375	3.90.228.10	145051678	145057230
Q13946	-	HGNC8791	8	PDE7A	1.10.1300.10	66631527	66659933
A8MW92	+	HGNC24280	8	PHF20L1	2.30.30.140	133790075	133806794
P00750	-	HGNC9051	8	PLAT	2.10.25.10	42045076	42048898	2.10.70.10	42045532	42048898
Q15149	-	HGNC9069	8	PLEC	1.10.418.10	145009205	145024351
P06746	+	HGNC9174	8	POLB	1.10.150.110	42196143	42229172	1.10.150.20	42196143	42229172	3.30.210.10	42196143	42229172	3.30.460.10	42196143	42229172
Q05397	-	HGNC9611	8	PTK2	1.10.510.10	141745378	141799584	1.20.120.330	141669633	141684500	1.20.5.540	141669633	141684500	3.30.200.20	141745378	141799584
Q14289	+	HGNC9612	8	PTK2B	1.10.510.10	27293307	27300428	1.20.120.330	27310663	27316023	3.30.200.20	27293307	27300428
O75365	+	HGNC9636	8	PTP4A3	3.90.190.10	142432341	142441141
Q9UHX1	-	HGNC17042	8	PUF60	3.30.70.330	144899821	144900700	3.30.70.330	144898692	144899132	3.40.30.10	144898872	144899081
P61019	+	HGNC9763	8	RAB2A	3.40.50.300	61429770	61531174
P62888	-	HGNC10333	8	RPL30	3.30.1330.30	99054031	99057594
Q7LG56	-	HGNC17296	8	RRM2B	1.10.620.20	103225069	103251049
Q14160	-	HGNC30377	8	SCRIB	2.30.42.10	144887506	144889747
O00560	+	HGNC10662	8	SDCBP	2.30.42.10	59488555	59493144
O60504	+	HGNC30907	8	SORBS3	2.30.30.40	22426694	22428560
Q9H6I2	+	HGNC18122	8	SOX17	1.10.30.10	55370900	55371718
P49675	-	HGNC11359	8	STAR	3.30.530.20	38001796	38005827
P23193	-	HGNC11612	8	TCEA1	2.20.25.10	54880666	54891655
Q15369	-	HGNC11617	8	TCEB1	3.30.710.10	74858867	74868244
P54274	+	HGNC11728	8	TERF1	1.10.10.60	73951422	73958369	1.25.40.210	73921293	73939204
Q96RS0	+	HGNC17843	8	TGS1	3.40.50.150	56715018	56737259
O14763	-	HGNC11905	8	TNFRSF10B	2.10.50.10	22886039	22900740
O95271	+	HGNC11941	8	TNKS	3.90.228.10	9619143	9634243
P49638	-	HGNC12404	8	TTPA	1.10.8.20	63973813	63998579	1.20.5.1200	63973813	63998579	3.40.525.10	63973813	63998579
Q15819	+	HGNC12495	8	UBE2V2	3.10.110.10	48921015	48973385
O95071	-	HGNC16806	8	UBR5	1.10.1900.10	103281207	103282319
Q96HA8	+	HGNC25490	8	WDYHV1	3.10.620.10	124429093	124453652
Q14191	+	HGNC12791	8	WRN	1.10.10.10	30989900	31000145	1.10.150.80	31004603	31012178	3.30.420.10	30916684	30925827
Q9H0M0	+	HGNC17004	8	WWP1	3.30.2160.10	87447715	87479104	3.30.2410.10	87447715	87479104	3.90.1750.10	87447715	87479104
P63104	-	HGNC12855	8	YWHAZ	1.20.190.20	101932923	101961116
Q9UKY1	-	HGNC12871	8	ZHX1	1.10.10.60	124265993	124266223
Q9Y6X8	+	HGNC18513	8	ZHX2	1.10.10.60	123965080	123965253	1.10.10.60	123965320	123965547
P00519	+	HGNC76	9	ABL1	1.10.510.10	133589785	133755519	1.20.120.330	133760639	133761010	2.30.30.40	133589785	133755510	3.30.200.20	133589785	133755519	3.30.505.10	133589785	133755510
P16442	-	HGNC79	9	ABO	3.90.550.10	136131054	136135235
P13716	-	HGNC395	9	ALAD	3.20.20.70	116150582	116155838
P05062	-	HGNC417	9	ALDOB	3.20.20.70	104184093	104193165
P02760	-	HGNC453	9	AMBP	2.40.128.20	116825035	116840431	4.10.410.10	116822521	116825025
Q92688	+	HGNC16677	9	ANP32B	3.80.10.10	100745838	100767401
P04083	+	HGNC533	9	ANXA1	1.10.220.10	75773665	75775247
Q02410	-	HGNC578	9	APBA1	2.30.29.30	72067136	72082863	2.30.42.10	72046245	72067042
Q7Z2E3	-	HGNC15984	9	APTX	2.60.200.20	32987718	32989888
P00966	+	HGNC758	9	ASS1	1.20.5.470	133327616	133376405	3.40.50.620	133327616	133376405	3.90.1260.10	133327616	133376405
Q13825	-	HGNC890	9	AUH	1.10.12.10	93976632	94123969	3.90.226.10	93976632	94123969
P15291	-	HGNC924	9	B4GALT1	3.90.550.10	33113454	33166791
Q99933	-	HGNC937	9	BAG1	1.20.58.120	33255252	33259030	3.10.20.90	33259028	33264242
Q15059	-	HGNC1104	9	BRD3	1.20.920.10	136916717	136918529	1.20.920.10	136907040	136913374
P01031	-	HGNC1331	9	C5	1.20.91.20	123776154	123777500	2.40.50.120	123715019	123723759
P07360	+	HGNC1354	9	C8G	2.40.128.20	139839833	139841230
Q16773	-	HGNC1564	9	CCBL1	3.40.640.10	131595865	131607683	3.90.1150.10	131595865	131607683
O00585	-	HGNC10620	9	CCL21	2.40.50.40	34709393	34709891
Q9Y4X3	-	HGNC10626	9	CCL27	2.40.50.40	34661943	34662410
Q9NZQ7	+	HGNC17635	9	CD274	2.60.40.10	5456165	5465533
O60729	-	HGNC1719	9	CDC14B	3.90.190.10	99285629	99381545
P50750	+	HGNC1780	9	CDK9	1.10.510.10	130548428	130551819	3.30.200.20	130548428	130551738
P42771	-	HGNC1787	9	CDKN2A	1.25.40.20	21968230	21974825
P19835	+	HGNC1848	9	CEL	3.40.50.1820	135937441	135946539
P33552	+	HGNC2000	9	CKS2	3.30.170.10	91926208	91931337
O95833	-	HGNC2064	9	CLIC3	1.20.1050.10	139889153	139890994	3.40.30.10	139889153	139890994
P26992	-	HGNC2170	9	CNTFR	2.60.40.10	34552705	34557523
P07711	+	HGNC2537	9	CTSL	2.40.50.170	90345385	90346019	3.90.70.10	90343255	90346019
O60911	-	HGNC2538	9	CTSV	3.90.70.10	99795233	99799589
P53355	+	HGNC2674	9	DAPK1	1.10.510.10	90113993	90258374	3.30.200.20	90113993	90258374
Q96HU8	-	HGNC19323	9	DIRAS2	3.40.50.300	93375581	93376096
P31689	+	HGNC5229	9	DNAJA1	1.10.287.110	33026483	33026888
Q05193	+	HGNC2972	9	DNM1	2.30.29.30	131002038	131010208	3.40.50.300	131012493	131012567
Q9H9B1	+	HGNC24650	9	EHMT1	2.170.270.10	140707534	140729306
Q9BS26	-	HGNC18311	9	ERP44	3.40.30.10	102744896	102822423
P09467	-	HGNC3606	9	FBP1	3.30.540.10	97365665	97401588	3.40.190.80	97365665	97401588
O00757	-	HGNC3607	9	FBP2	3.30.540.10	97321222	97356004	3.40.190.80	97321222	97356004
O00602	-	HGNC3623	9	FCN1	3.90.215.10	137801646	137805441	4.10.530.10	137801646	137805441
Q15485	+	HGNC3624	9	FCN2	3.90.215.10	137776600	137779258	4.10.530.10	137776600	137779258
Q5JSP0	+	HGNC16027	9	FGD3	2.30.29.30	95796850	95797802
Q16595	+	HGNC3951	9	FXN	3.30.920.10	71661379	71687675
O95257	+	HGNC4097	9	GADD45G	3.30.1330.30	92220037	92220991
Q9Y2T3	+	HGNC4212	9	GDA	3.20.20.140	74764476	74865666
Q9H4G4	+	HGNC18007	9	GLIPR2	3.40.33.10	36136776	36162516
Q9Y223	-	HGNC23657	9	GNE	3.30.420.40	36217463	36227402
Q9UBQ7	+	HGNC4570	9	GRHPR	3.40.50.720	37422748	37436776
P06396	+	HGNC4620	9	GSN	3.40.20.10	124081129	124094878	3.40.20.10	124064250	124081092
P61978	-	HGNC5044	9	HNRNPK	3.30.1370.10	86584327	86585707
Q6YN16	+	HGNC18572	9	HSDL2	3.40.50.720	115142444	115216306
P11021	-	HGNC5238	9	HSPA5	3.30.30.30	128000872	128003329	3.30.420.40	128000872	128003329	3.90.640.10	128000872	128003329
P01563	-	HGNC5423	9	IFNA2	1.20.1250.10	21384764	21385258
P01574	-	HGNC5434	9	IFNB1	1.20.1250.10	21077307	21077804
Q9NRR6	-	HGNC21474	9	INPP5E	3.60.10.10	139324192	139329304
O60674	+	HGNC6192	9	JAK2	1.10.510.10	5081787	5126788	3.30.200.20	5081787	5126788
P31025	+	HGNC6525	9	LCN1	2.40.128.20	138413410	138417004
P80188	+	HGNC6526	9	LCN2	2.40.128.20	130911865	130915395
Q6UWW0	-	HGNC33777	9	LCN15	2.40.128.20	139656294	139658885
Q9UKM7	+	HGNC6823	9	MAN1B1	1.50.10.10	139990737	140003040
O75970	-	HGNC7208	9	MPDZ	2.30.42.10	13147558	13158026	2.30.42.10	13222297	13224416	2.30.42.10	13121820	13123231	2.30.42.10	13115294	13121804	2.30.42.10	13110039	13113035	2.30.42.10	13106966	13109053	2.30.42.10	13205999	13217262
Q13126	+	HGNC7413	9	MTAP	3.40.50.1580	21802748	21862010
Q09161	+	HGNC7658	9	NCBP1	1.25.40.180	100396164	100433478
P62166	+	HGNC3953	9	NCS1	1.10.238.10	132934943	132988763
Q9NWW6	-	HGNC26057	9	NMRK1	3.40.50.300	77676466	77698030
P46531	-	HGNC7881	9	NOTCH1	1.25.40.20	139391812	139396223	2.10.25.10	139410523	139412612
Q13285	-	HGNC7983	9	NR5A1	1.10.565.10	127245039	127262577
Q16620	+	HGNC8032	9	NTRK2	1.10.510.10	87482292	87636301	2.60.40.10	87339265	87342870	3.30.200.20	87482292	87636301
P50583	+	HGNC8049	9	NUDT2	3.90.79.10	34339038	34343435
P02763	+	HGNC8498	9	ORM1	2.40.128.20	117085468	117088634
P19652	+	HGNC8499	9	ORM2	2.40.128.20	117092239	117095411
Q92882	+	HGNC8510	9	OSTF1	1.25.40.20	77703609	77761654	2.30.30.40	77703609	77761654
Q02548	-	HGNC8619	9	PAX5	1.10.10.10	37006497	37034027
Q5T6S3	-	HGNC24566	9	PHF19	2.30.30.140	123632799	123636907
Q9H4Q4	+	HGNC13997	9	PRDM12	2.170.270.10	133540218	133556639
P41222	+	HGNC9592	9	PTGDS	2.40.128.20	139872097	139875304
O14684	-	HGNC9599	9	PTGES	1.20.120.550	132501892	132515290
Q14914	-	HGNC18429	9	PTGR1	3.40.50.720	114325403	114359692	3.90.180.10	114325403	114359692
P26045	-	HGNC9655	9	PTPN3	3.90.190.10	112141838	112166798
P23468	-	HGNC9668	9	PTPRD	2.60.40.10	8504261	8517874
P61106	-	HGNC16524	9	RAB14	3.40.50.300	123943790	123955689
P54727	+	HGNC9813	9	RAD23B	1.10.10.540	110086176	110087195	3.10.20.90	110045911	110068677
Q12967	-	HGNC9842	9	RALGDS	3.10.20.90	135973976	135977037
Q5JS13	+	HGNC16851	9	RALGPS1	1.10.840.10	129728132	129937018
Q8IZ41	-	HGNC26464	9	RASEF	1.10.238.10	85677557	85677775	3.40.50.300	85597678	85615209
Q969G6	-	HGNC30324	9	RFK	2.40.30.30	79002338	79009086
P49796	+	HGNC9999	9	RGS3	1.10.167.10	116357206	116359206	2.30.42.10	116267722	116269633	2.60.40.150	116224466	116259671
Q01974	-	HGNC10257	9	ROR2	1.10.510.10	94486516	94488854	3.30.200.20	94486516	94488854
P19793	+	HGNC10477	9	RXRA	1.10.565.10	137293480	137328457	3.30.50.10	137293480	137328457
Q92854	-	HGNC10732	9	SEMA4D	2.130.10.10	91994176	92020307	2.60.40.10	91994176	92020307	3.30.1680.10	91994176	92020307
Q99962	+	HGNC10831	9	SH3GL2	1.20.1270.60	40796811	40801775
Q13813	+	HGNC11273	9	SPTAN1	1.20.58.60	131329020	131337031
P43405	+	HGNC11491	9	SYK	1.10.510.10	93636977	93657879	1.10.930.10	93606205	93626939	3.30.200.20	93636977	93657879	3.30.505.10	93606205	93626948
Q9BYX2	-	HGNC18026	9	TBC1D2	2.30.29.30	101014124	101017687
Q02763	+	HGNC11724	9	TEK	1.10.510.10	27206619	27229227	2.170.300.10	27157843	27190534	2.60.40.10	27157843	27190534	3.30.200.20	27206619	27229227
P36897	+	HGNC11772	9	TGFBR1	1.10.510.10	101894931	101911584	2.10.60.10	101867578	101894792	3.30.200.20	101894931	101911584
Q9UDY2	+	HGNC11828	9	TJP2	2.30.42.10	71836283	71840943
Q04724	-	HGNC11837	9	TLE1	2.130.10.10	84199115	84225138
P24821	-	HGNC5318	9	TNC	2.60.40.10	117838849	117844050
O95150	-	HGNC11931	9	TNFSF15	2.60.120.40	117552734	117555844
Q12933	+	HGNC12032	9	TRAF2	2.60.210.10	139814935	139820350	3.30.40.10	139793193	139802554
P10599	-	HGNC12435	9	TXN	3.40.30.10	113006439	113018714
Q9UMX0	-	HGNC12508	9	UBQLN1	1.10.8.10	86276713	86276850	3.10.20.90	86297977	86322494
Q9HA47	-	HGNC14859	9	UCK1	3.40.50.300	134400546	134406497
Q96PU4	+	HGNC12557	9	UHRF2	2.30.280.10	6481737	6499870	3.30.40.10	6500560	6506176
P52735	-	HGNC12658	9	VAV2	3.30.505.10	136635545	136641180
P55072	-	HGNC12666	9	VCP	1.10.8.60	35060836	35072349	2.40.40.20	35060836	35072349	3.10.330.10	35060836	35072349	3.40.50.300	35060836	35072349
P61964	+	HGNC12757	9	WDR5	2.130.10.10	137005000	137023112
P23025	-	HGNC12814	9	XPA	3.90.530.10	100447220	100451912
Q5JVG2	-	HGNC23385	9	ZNF484	3.30.160.60	95609835	95609933	3.30.160.60	95609331	95609429
Q9NQ94	-	HGNC24086	10	A1CF	3.30.70.330	52575982	52587992
P45954	+	HGNC91	10	ACADSB	1.10.540.10	124793983	124813278	1.20.140.10	124793983	124813278	2.40.110.10	124793983	124813278
Q5T8D3	-	HGNC23338	10	ACBD5	1.20.80.10	27512342	27529301
P78325	-	HGNC215	10	ADAM8	3.40.390.10	135085106	135086510
P55263	+	HGNC257	10	ADK	3.30.1110.10	75911100	76468200	3.40.1190.20	75911100	76468200
Q04828	+	HGNC384	10	AKR1C1	3.20.20.100	5005637	5019931
P52895	-	HGNC385	10	AKR1C2	3.20.20.100	5032190	5046026
P42330	+	HGNC386	10	AKR1C3	3.20.20.100	5136637	5149692
P17516	+	HGNC387	10	AKR1C4	3.20.20.100	5238831	5260720
P54886	-	HGNC9722	10	ALDH18A1	3.40.309.10	97366521	97386527	3.40.605.10	97366521	97386527
P13928	+	HGNC546	10	ANXA8	1.10.220.10	48255429	48270512
Q5T5U3	-	HGNC23725	10	ARHGAP21	2.30.29.30	24886421	24890968
Q14865	+	HGNC17362	10	ARID5B	1.10.150.60	63816981	63845533
Q96KC2	+	HGNC23052	10	ARL5B	3.40.50.300	18948567	18964142
P35226	+	HGNC1066	10	BMI1	3.30.40.10	22615391	22616708
P36894	+	HGNC1076	10	BMPR1A	2.10.60.10	88649821	88659809
Q9Y297	+	HGNC1144	10	BTRC	1.20.1280.50	103281594	103310614	2.130.10.10	103281594	103310614
P27482	+	HGNC1452	10	CALML3	1.10.238.10	5567052	5567495
Q8IU85	+	HGNC19341	10	CAMK1D	1.10.510.10	12391818	12867649	3.30.200.20	12391818	12867649
Q13555	-	HGNC1463	10	CAMK2G	1.10.510.10	75601927	75634206	3.30.200.20	75601927	75634206
P55210	+	HGNC1508	10	CASP7	3.40.50.1460	115439517	115486165
Q86VU5	-	HGNC26309	10	COMTD1	3.40.50.150	76993833	76995489
Q8NE35	-	HGNC21746	10	CPEB3	3.30.70.330	93851653	93904746
P15169	-	HGNC2312	10	CPN1	2.60.40.1120	101802186	101841315	3.40.630.10	101802186	101841315
P56545	-	HGNC2495	10	CTBP2	3.40.50.720	126715236	126716237
Q9NTM9	+	HGNC24271	10	CUTC	3.20.20.380	101492106	101515493
P48061	-	HGNC10672	10	CXCL12	2.40.50.40	44873352	44876325
P10632	-	HGNC2622	10	CYP2C8	1.10.630.10	96796887	96829104
P11712	+	HGNC2623	10	CYP2C9	1.10.630.10	96698491	96748782
P33261	+	HGNC2621	10	CYP2C19	1.10.630.10	96522529	96612665
P05181	+	HGNC2631	10	CYP2E1	1.10.630.10	135340993	135352465
P05093	-	HGNC2593	10	CYP17A1	1.10.630.10	104590461	104597048
O94907	+	HGNC2891	10	DKK1	2.10.80.10	54076180	54076564
Q9UKB3	-	HGNC28908	10	DNAJC12	1.10.287.110	69571281	69597768
P04053	+	HGNC2983	10	DNTT	3.40.50.10190	98064309	98078280
Q68J44	-	HGNC23481	10	DUPD1	3.90.190.10	76797596	76818268
Q16690	+	HGNC3071	10	DUSP5	3.90.190.10	112266696	112270181
Q96DC8	+	HGNC23489	10	ECHDC3	1.10.12.10	11784684	11805531	3.90.226.10	11784684	11805531
P30084	-	HGNC3151	10	ECHS1	1.10.12.10	135176374	135186755	3.90.226.10	135176374	135186755
P25445	+	HGNC11920	10	FAS	1.10.533.10	90773100	90774204
P55075	-	HGNC3686	10	FGF8	2.80.10.50	103530208	103534888
P21802	-	HGNC3689	10	FGFR2	1.10.510.10	123239505	123274683	2.60.40.10	123274816	123324051	3.30.200.20	123239505	123274683
Q9UK05	-	HGNC4217	10	GDF2	2.10.90.10	48413580	48413909
O76003	+	HGNC15987	10	GLRX3	3.40.30.10	131934685	131959158	3.40.30.10	131959171	131977650
P00367	-	HGNC4335	10	GLUD1	1.10.287.140	88811510	88854366	3.40.50.10860	88811510	88854366	3.40.50.720	88811510	88854366
P17174	-	HGNC4432	10	GOT1	3.40.640.10	101157309	101190282	3.90.1150.10	101157309	101190282
P78417	+	HGNC13312	10	GSTO1	1.20.1050.10	106014687	106027160	3.40.30.10	106014687	106027160
Q9H4Y5	+	HGNC23064	10	GSTO2	1.20.1050.10	106034674	106059027	3.40.30.10	106034674	106059027
Q9P0M6	+	HGNC14453	10	H2AFY2	3.40.220.10	71853542	71871427
Q9NWT6	+	HGNC17113	10	HIF1AN	1.10.287.1010	102295716	102307891
P19367	+	HGNC4922	10	HK1	3.30.420.40	71078704	71160888	3.40.367.20	71078704	71160888
P52597	-	HGNC5039	10	HNRNPF	3.30.70.330	43883026	43883331	3.30.70.330	43882189	43882503
Q86XE5	+	HGNC25155	10	HOGA1	3.20.20.70	99344536	99371413
Q92743	+	HGNC9476	10	HTRA1	2.30.42.10	124269629	124273872	2.40.10.10	124221640	124273872
P01589	-	HGNC6008	10	IL2RA	2.10.70.10	6061403	6104050
P33176	-	HGNC6324	10	KIF5B	3.40.850.10	32323753	32344900
P52732	+	HGNC6388	10	KIF11	3.40.850.10	94353133	94376568
O75112	+	HGNC15710	10	LDB3	2.30.42.10	88428449	88439848
Q9H008	+	HGNC30042	10	LHPP	3.40.50.1000	126150432	126301926
P07098	+	HGNC6622	10	LIPF	3.40.50.1820	90427106	90438405
P45983	+	HGNC6881	10	MAPK8	1.10.510.10	49609704	49639312	3.30.200.20	49609704	49639267
Q00266	-	HGNC6903	10	MAT1A	3.30.300.10	82033539	82049133
P11226	-	HGNC6922	10	MBL2	3.10.100.10	54527899	54529057
P16455	+	HGNC7059	10	MGMT	1.10.10.10	131265480	131565165	3.30.160.70	131265480	131565165
P46013	-	HGNC7107	10	MKI67	2.60.200.20	129914794	129923930
Q5T2T1	-	HGNC26542	10	MPP7	2.30.42.10	28409537	28420532
P22897	+	HGNC7228	10	MRC1	3.10.100.10	18155637	18162729
O76041	-	HGNC16932	10	NEBL	2.30.30.40	21074678	21076135
Q7Z628	+	HGNC14592	10	NET1	1.20.900.10	5494438	5497003
Q00653	+	HGNC7795	10	NFKB2	1.10.533.10	104161504	104161915	2.60.40.10	104156211	104158276	2.60.40.340	104156211	104158276
O14786	-	HGNC8004	10	NRP1	2.60.120.260	33496500	33559611	2.60.120.290	33496500	33559611
Q9UKK9	-	HGNC8052	10	NUDT5	3.90.79.10	12209730	12228289
P04181	-	HGNC8091	10	OAT	3.40.640.10	126086513	126100739	3.90.1150.10	126086513	126100739
P13674	-	HGNC8546	10	P4HA1	1.25.40.10	74810921	74813330
O95340	+	HGNC8604	10	PAPSS2	3.40.50.300	89468986	89474756
Q8TEW0	-	HGNC16051	10	PARD3	2.30.42.10	34663822	34671515
Q53EL6	+	HGNC8763	10	PDCD4	1.25.40.180	112645038	112657843
Q14690	+	HGNC13408	10	PDCD11	2.40.50.140	105164893	105166511
O00151	-	HGNC2067	10	PDLIM1	2.10.110.10	96997726	96998379
P18669	+	HGNC8888	10	PGAM1	3.40.50.1240	99186065	99192278
P48426	-	HGNC8997	10	PIP4K2A	3.30.800.10	22826135	23003152
P00749	+	HGNC9052	10	PLAU	2.10.25.10	75671978	75673135	2.40.20.10	75671978	75673135
Q9P212	+	HGNC17175	10	PLCE1	3.10.20.90	96073023	96076513	3.10.20.90	96081706	96084666
Q9HB21	+	HGNC14335	10	PLEKHA1	2.30.29.30	124175450	124189148
P16233	+	HGNC9155	10	PNLIP	3.40.50.1820	118306808	118327307
P54315	+	HGNC9156	10	PNLIPRP1	2.60.60.20	118351285	118368625	3.40.50.1820	118351285	118368625
P54317	+	HGNC9157	10	PNLIPRP2	2.60.60.20	118380866	118404603	3.40.50.1820	118380866	118404603
Q9UGP5	-	HGNC9184	10	POLL	1.10.150.110	103339212	103344525	1.10.150.20	103339212	103344525	3.30.210.10	103339212	103344525	3.30.460.10	103339212	103344525	3.40.50.10190	103345623	103347017
P30405	+	HGNC9259	10	PPIF	2.40.100.10	81107431	81113595
Q04759	-	HGNC9410	10	PRKCQ	1.10.510.10	6470171	6525499	3.30.200.20	6470171	6525499	3.30.60.20	6539017	6540469	3.30.60.20	6528044	6533755
Q13976	+	HGNC9414	10	PRKG1	2.60.120.10	52834618	53564388
Q9NRG1	-	HGNC23333	10	PRTFDC1	3.40.50.2020	25138775	25241503
P07602	-	HGNC9498	10	PSAP	1.10.225.10	73579492	73580076	1.10.225.10	73578466	73579364	1.10.225.10	73588789	73591673
P60484	+	HGNC9588	10	PTEN	2.60.40.1110	89624248	89725076	3.90.190.10	89624248	89725076
P23469	+	HGNC9669	10	PTPRE	3.90.190.10	129847829	129881158
Q9NP72	+	HGNC14244	10	RAB18	3.40.50.300	27793299	27826905
Q96I25	+	HGNC16944	10	RBM17	3.30.70.330	6155515	6157516
P02753	-	HGNC9922	10	RBP4	2.40.128.20	95351834	95360730
P07949	+	HGNC9967	10	RET	1.10.510.10	43610161	43620430	2.60.40.60	43595918	43600584	3.30.200.20	43610161	43620430
O43665	-	HGNC9992	10	RGS10	1.10.167.10	121259714	121302125
Q9NR31	-	HGNC10534	10	SAR1A	3.40.50.300	71912234	71921643
P53992	+	HGNC10705	10	SEC24C	2.60.40.1670	75520605	75530850	3.40.50.410	75520605	75530850
P49903	-	HGNC19685	10	SEPHS1	3.30.1330.10	13361144	13386949
P35247	-	HGNC10803	10	SFTPD	1.20.5.360	81697964	81701162	3.10.100.10	81697610	81701225
Q9H2G2	+	HGNC11088	10	SLK	1.10.510.10	105727558	105761297	3.30.200.20	105727558	105761297
O75940	-	HGNC16900	10	SMNDC1	2.30.30.140	112057365	112058475
Q9BX66	-	HGNC14565	10	SORBS1	2.30.30.40	97074821	97081735	2.30.30.40	97098964	97101103
Q92783	+	HGNC11357	10	STAM	1.25.40.90	17686348	17730157	2.30.30.40	17737131	17738846
Q9H5I1	+	HGNC17287	10	SUV39H2	2.170.270.10	14939001	14944508
O95425	-	HGNC11480	10	SVIL	1.10.950.10	29747178	29747475
Q9NQB0	+	HGNC11641	10	TCF7L2	4.10.900.10	114710531	114710677
Q00059	+	HGNC11741	10	TFAM	1.10.30.10	60150540	60154747
Q9H2K2	+	HGNC15677	10	TNKS2	1.25.40.20	93596678	93602054	3.90.228.10	93614806	93622753
O14717	-	HGNC2977	10	TRDMT1	3.40.50.150	17191041	17243629	3.90.120.10	17191041	17243629
Q9HAU5	-	HGNC17854	10	UPF2	1.25.40.180	11990496	12001237
P10746	-	HGNC12592	10	UROS	3.40.50.10090	127477439	127505067
P18206	+	HGNC12665	10	VCL	1.20.120.230	75757966	75834652	1.20.120.230	75868735	75877924
P08670	+	HGNC12692	10	VIM	1.20.5.170	17276791	17277851
Q5T4F4	+	HGNC26559	10	ZFYVE27	3.30.40.10	99512918	99519054
Q9H7C9	+	HGNC30205	11	AAMDC	3.40.1230.10	77553546	77583358
Q9NRN7	+	HGNC14235	11	AASDHPPT	3.90.470.20	105948477	105967631
Q9UKU7	+	HGNC87	11	ACAD8	1.10.540.10	134123564	134134851	1.20.140.10	134123564	134134851	2.40.110.10	134123564	134134851
P24752	+	HGNC93	11	ACAT1	3.40.47.10	108002661	108018114
Q08043	+	HGNC165	11	ACTN3	1.10.418.10	66314057	66322810
P25098	+	HGNC289	11	ADRBK1	1.10.167.10	67034171	67052918	1.10.510.10	67034171	67052918	2.30.29.30	67034171	67052918	3.30.200.20	67034171	67052918
O00170	+	HGNC358	11	AIP	1.25.40.10	67257536	67258461
Q96BT7	-	HGNC25189	11	ALKBH8	3.30.70.330	107427492	107431555
O00213	-	HGNC581	11	APBB1	2.30.29.30	6422647	6424382
P02647	-	HGNC600	11	APOA1	1.20.5.1230	116706526	116707125	1.20.5.20	116706694	116706831
P53365	-	HGNC17160	11	ARFIP2	1.20.1270.60	6498444	6500431
Q07960	-	HGNC673	11	ARHGAP1	1.10.555.10	46700589	46702603
Q9P2F6	-	HGNC18357	11	ARHGAP20	1.10.555.10	110453111	110462792
A7KAX9	-	HGNC17399	11	ARHGAP32	1.10.555.10	128851317	128868267
Q9NZN5	+	HGNC14193	11	ARHGEF12	1.20.900.10	120328859	120347976	2.30.29.30	120328859	120347976	2.30.42.10	120280159	120298824
Q9P2W7	-	HGNC921	11	B3GAT1	3.90.550.10	134251834	134253947
O94766	-	HGNC923	11	B3GAT3	3.90.550.10	62383175	62387999
P56817	-	HGNC933	11	BACE1	2.40.70.10	117160425	117186390
O75531	+	HGNC17397	11	BANF1	1.10.150.40	65770722	65771240
P23560	-	HGNC1033	11	BDNF	2.10.90.10	27679616	27679972
Q13490	+	HGNC590	11	BIRC2	1.10.1170.10	102221336	102234413	1.10.1170.10	102220703	102220942
Q13489	+	HGNC591	11	BIRC3	1.10.1170.10	102195970	102198840	1.10.1170.10	102195316	102195537	3.30.40.10	102207517	102207830
Q9BXJ0	-	HGNC14344	11	C1QTNF5	2.60.120.40	119215626	119216602
Q9H3H3	-	HGNC28801	11	C11orf68	3.30.760.10	65685058	65686501
P07384	+	HGNC1476	11	CAPN1	3.90.70.10	64950257	64956132
P57730	-	HGNC28861	11	CARD18	1.10.533.10	105009542	105010449
P29466	-	HGNC1499	11	CASP1	3.30.70.1470	104896987	104899907	3.40.50.1460	104896987	104903817
P22681	+	HGNC1541	11	CBL	1.10.238.10	119077200	119149294	1.20.930.20	119077200	119149294	3.30.40.10	119077266	119149294	3.30.505.10	119077200	119149294
P24385	+	HGNC1582	11	CCND1	1.10.472.10	69456082	69465975
O14618	+	HGNC1613	11	CCS	2.60.40.200	66366724	66373212	3.30.70.100	66360733	66366934
P04234	-	HGNC1673	11	CD3D	2.60.40.10	118210595	118211296
P07766	+	HGNC1674	11	CD3E	2.60.40.10	118178014	118184447
P06127	+	HGNC1685	11	CD5	3.10.250.10	60889085	60890386
P13987	-	HGNC1689	11	CD59	2.10.60.10	33731749	33739008
P60033	+	HGNC1701	11	CD81	1.10.1450.10	2416259	2417899
Q4KMG0	-	HGNC17104	11	CDON	2.60.40.10	125859532	125864833
Q92879	-	HGNC2549	11	CELF1	3.30.70.330	47505046	47521074	3.30.70.330	47493868	47497007
P23528	-	HGNC1874	11	CFL1	3.40.20.10	65622809	65625569
O14757	+	HGNC1925	11	CHEK1	1.10.510.10	125496664	125513712	3.30.200.20	125496664	125513739
P35790	-	HGNC1937	11	CHKA	3.10.450.110	67821457	67888496	3.90.1200.10	67821457	67888496
Q8N684	-	HGNC30098	11	CPSF7	3.30.70.330	61187526	61196688
O95727	+	HGNC24313	11	CRTAM	2.60.40.10	122720781	122724655
P50461	-	HGNC2472	11	CSRP3	2.10.110.10	19204273	19207821	2.10.110.10	19209765	19213976
P53634	-	HGNC2528	11	CTSC	2.40.128.80	88027176	88070767	2.40.50.170	88027176	88027382	3.90.70.10	88027176	88070767
P07339	-	HGNC2529	11	CTSD	2.40.70.10	1774741	1778749	2.40.70.10	1778774	1782573
Q93034	+	HGNC2556	11	CUL5	1.20.1310.10	107959276	107975108
Q6VVX0	-	HGNC20580	11	CYP2R1	1.10.630.10	14899670	14913657
Q96C86	+	HGNC29812	11	DCPS	3.30.2240.10	126174087	126215505	3.30.428.10	126173976	126215505
Q8WTU0	+	HGNC18961	11	DDI1	2.40.70.10	103908265	103908651
P26196	-	HGNC2747	11	DDX6	3.40.50.300	118625423	118650429
Q13206	+	HGNC2735	11	DDX10	3.40.50.300	108536019	108550279
Q9UHL0	+	HGNC18698	11	DDX25	3.40.50.300	125787027	125792761
P10515	+	HGNC2896	11	DLAT	2.40.50.100	111899643	111908166
Q15700	-	HGNC2901	11	DLG2	2.30.42.10	83770427	83962285	2.30.42.10	83585488	83674015
Q14919	+	HGNC3019	11	DRAP1	1.10.20.10	65686973	65687835
O75530	+	HGNC3188	11	EED	2.130.10.10	85961341	85989564
P26641	-	HGNC3213	11	EEF1G	3.30.70.1010	62327153	62334308
Q9UKW6	-	HGNC3320	11	ELF5	1.10.10.10	34501767	34502505
Q9H6S3	+	HGNC21296	11	EPS8L2	1.10.150.50	726384	726924
P11474	+	HGNC3471	11	ESRRA	1.10.565.10	64082215	64083435
P14921	-	HGNC3488	11	ETS1	1.10.10.10	128332390	128354741
P00734	+	HGNC3535	11	F2	2.40.10.10	46748116	46760955	2.40.20.10	46747444	46748115
Q13158	+	HGNC3573	11	FADD	1.10.533.10	70049566	70052576
P35544	-	HGNC3597	11	FAU	3.10.20.90	64888506	64889284
P10109	+	HGNC3638	11	FDX1	3.10.20.30	110301025	110333189
P08620	-	HGNC3682	11	FGF4	2.80.10.50	69588079	69589617
O95750	-	HGNC3675	11	FGF19	2.80.10.50	69514032	69518577
Q01543	+	HGNC3749	11	FLI1	1.10.10.10	128679096	128680643	1.10.150.50	128638080	128675265
Q04609	-	HGNC3788	11	FOLH1	1.20.930.40	49168310	49227712	3.40.630.10	49168310	49227712	3.50.30.30	49168310	49227712
P01225	+	HGNC3964	11	FSHB	2.10.90.10	30253504	30255344
P02794	-	HGNC3976	11	FTH1	1.20.1260.10	61732201	61734893
P09211	+	HGNC4638	11	GSTP1	1.20.1050.10	67351607	67354045	3.40.30.10	67351607	67354045
P32780	+	HGNC4655	11	GTF2H1	2.30.29.30	18354622	18357470
P68871	-	HGNC4827	11	HBB	1.10.490.10	5246830	5248247
P02042	-	HGNC4829	11	HBD	1.10.490.10	5254196	5255659
P02100	-	HGNC4830	11	HBE1	1.10.490.10	5289701	5291116
P69891	-	HGNC4831	11	HBG1	1.10.490.10	5269591	5271030
P69892	-	HGNC4832	11	HBG2	1.10.490.10	5274509	5275954
P08397	+	HGNC4982	11	HMBS	3.40.190.10	118955744	118963990
P01112	-	HGNC5173	11	HRAS	3.40.50.300	532692	534321
P11142	-	HGNC5241	11	HSPA8	3.30.420.40	122929946	122932022
Q9BUP3	+	HGNC16637	11	HTATIP2	3.40.50.720	20385358	20404646
P01344	-	HGNC5466	11	IGF2	1.10.100.10	2156648	2161453
P38935	+	HGNC5542	11	IGHMBP2	3.30.1370.50	68704079	68704306
Q13651	+	HGNC5964	11	IL10RA	2.60.40.10	117857246	117866320
Q14116	-	HGNC5986	11	IL18	2.80.10.50	112014321	112020911
Q13418	+	HGNC6040	11	ILK	1.25.40.20	6625502	6630176
O15357	+	HGNC6080	11	INPPL1	1.10.150.50	71949113	71949394	3.60.10.10	71941897	71944772
P01308	-	HGNC6081	11	INS	1.10.100.10	2181084	2181146
Q92993	+	HGNC5275	11	KAT5	3.30.60.60	65481308	65486529	3.40.630.30	65481308	65486529
Q8NI77	-	HGNC29441	11	KIF18A	3.40.850.10	28106187	28119493
Q8IZU9	-	HGNC23204	11	KIRREL3	2.60.40.10	126305187	126314888
Q03164	+	HGNC7132	11	KMT2A	2.170.270.10	118390703	118392875	3.30.40.10	118360958	118362523
P00338	+	HGNC6535	11	LDHA	3.40.50.720	18418098	18428738	3.90.110.10	18418098	18428738
P25791	-	HGNC6642	11	LMO2	2.10.110.10	33881117	33891063
Q9HCJ2	-	HGNC29317	11	LRRC4C	2.60.40.10	40136510	40137712
Q7KZI7	+	HGNC3332	11	MARK2	1.10.510.10	63662721	63668529	1.10.8.10	63662721	63668529	3.30.200.20	63662721	63668529
P21741	+	HGNC6972	11	MDK	2.20.60.10	46403674	46404010	2.30.90.10	46404142	46404270
O94851	+	HGNC24693	11	MICAL2	1.10.418.10	12246225	12247916
P03956	-	HGNC7155	11	MMP1	2.110.10.10	102661145	102668765	3.40.390.10	102661145	102668765
P08254	-	HGNC7173	11	MMP3	3.40.390.10	102710954	102714225
P22894	-	HGNC7175	11	MMP8	3.40.390.10	102587145	102593211
P09238	-	HGNC7156	11	MMP10	3.40.390.10	102647153	102650286
P39900	-	HGNC7158	11	MMP12	2.110.10.10	102733832	102743628	3.40.390.10	102738106	102743646
P45452	-	HGNC7159	11	MMP13	3.40.390.10	102820933	102826032
O60882	-	HGNC7167	11	MMP20	3.40.390.10	102477402	102487579
Q9NRX2	-	HGNC14053	11	MRPL17	3.90.1030.10	6703468	6704445
Q13614	-	HGNC7450	11	MTMR2	2.30.29.30	95569323	95598809
Q14896	-	HGNC7551	11	MYBPC3	2.60.40.10	47369448	47371618	2.60.40.10	47372793	47374194	2.60.40.10	47359343	47362559
Q9Y3Q0	+	HGNC14526	11	NAALAD2	1.20.930.40	89868750	89924912	3.40.630.10	89868750	89924912	3.50.30.30	89868750	89924912
Q8IVL1	+	HGNC15997	11	NAV2	1.10.418.10	19854030	19901494
P13591	+	HGNC7656	11	NCAM1	2.60.40.10	113102517	113131020
Q13133	+	HGNC7966	11	NR1H3	1.10.565.10	47282836	47290244
P52948	-	HGNC8068	11	NUP98	3.30.1610.10	3733874	3744449
Q9UBU9	-	HGNC8071	11	NXF1	1.10.8.10	62559950	62561838	3.10.450.50	62559950	62564800	3.30.70.330	62564795	62570973	3.80.10.10	62564795	62570973
Q13153	-	HGNC8590	11	PAK1	1.10.510.10	77034321	77066742	3.30.200.20	77034321	77066742	3.90.810.10	77085402	77091021
Q9NVD7	+	HGNC14652	11	PARVA	1.10.418.10	12525923	12540018
P26367	-	HGNC8620	11	PAX6	1.10.10.10	31822395	31827949
P11498	-	HGNC8636	11	PC	1.10.10.60	66616372	66620778	3.10.600.10	66616372	66620778	3.20.20.70	66616372	66620778
O00408	-	HGNC8777	11	PDE2A	1.10.1300.10	72288496	72293606
Q13370	+	HGNC8779	11	PDE3B	1.10.1300.10	14853189	14891086
O00330	+	HGNC21350	11	PDHX	2.40.50.100	34952959	34979011	4.10.320.10	34938362	34991691
Q86UT5	+	HGNC19891	11	PDZD3	2.30.42.10	119058769	119059248
P0DJD7	+	HGNC8886	11	PGA4	2.40.70.10	60990545	60999000
P06401	-	HGNC8910	11	PGR	1.10.565.10	100909849	100933372	3.30.50.10	100933469	100996839
Q96BD5	-	HGNC24156	11	PHF21A	3.30.40.10	45958096	45959856
Q9HB75	-	HGNC16491	11	PIDD1	1.10.533.10	799390	799956
O00443	-	HGNC8971	11	PIK3C2A	3.30.1520.10	17113552	17118716
P62487	+	HGNC9194	11	POLR2G	2.40.50.140	62529121	62533976	3.30.1490.120	62529121	62533976
P62136	-	HGNC9281	11	PPP1CA	3.60.21.10	67166008	67169234
Q9NQV6	-	HGNC13995	11	PRDM10	2.170.270.10	129807514	129814865
P30044	+	HGNC9355	11	PRDX5	3.40.30.10	64085847	64089160
P13727	-	HGNC9362	11	PRG2	3.10.100.10	57154950	57156532
O60678	+	HGNC30163	11	PRMT3	2.70.160.11	20419193	20529956	3.40.50.150	20419193	20529956
P54829	-	HGNC9657	11	PTPN5	3.90.190.10	18750489	18762226
Q12913	+	HGNC9673	11	PTPRJ	3.90.190.10	48171652	48188833
Q03393	+	HGNC9689	11	PTS	3.30.479.10	112097185	112104275
Q9H0U4	+	HGNC18370	11	RAB1B	3.40.50.300	66036157	66043625
P20340	-	HGNC9786	11	RAB6A	3.40.50.300	73388945	73471679
Q15771	-	HGNC9770	11	RAB30	3.40.50.300	82693266	82708354
Q99638	+	HGNC9827	11	RAD9A	3.70.10.10	67159516	67163809
Q9BWF3	+	HGNC9901	11	RBM4	3.30.70.330	66407183	66407413
Q9BQ04	-	HGNC28842	11	RBM4B	3.30.70.330	66436715	66444327
Q04206	-	HGNC9955	11	RELA	2.60.40.10	65423231	65429535	2.60.40.340	65423231	65429535
O00212	+	HGNC670	11	RHOD	3.40.50.300	66824392	66839031
P13489	-	HGNC10074	11	RNH1	3.80.10.10	494693	502158
P62070	-	HGNC17271	11	RRAS2	3.40.50.300	14300954	14380382
Q15637	-	HGNC12950	11	SF1	3.30.1370.10	64537509	64545467
Q9NTG7	-	HGNC14931	11	SIRT3	3.40.50.1220	216700	233469
P08195	+	HGNC11026	11	SLC3A2	3.20.20.80	62648826	62656162
Q92673	+	HGNC11185	11	SORL1	2.60.40.10	121477556	121478881
O15020	-	HGNC11276	11	SPTBN2	1.10.418.10	66478399	66481829
P31948	+	HGNC11387	11	STIP1	1.25.40.10	63953734	63961795	1.25.40.10	63963280	63967444
P37837	+	HGNC11559	11	TALDO1	3.20.20.70	747482	764842
P07101	-	HGNC11782	11	TH	1.10.800.10	2185465	2189723
Q9P016	-	HGNC29560	11	THYN1	3.10.590.10	134118346	134121082
P62072	-	HGNC11814	11	TIMM10	1.10.287.810	57296192	57297661
P58753	+	HGNC17192	11	TIRAP	3.40.50.10140	126162536	126162967
Q9Y320	+	HGNC30739	11	TMX2	3.40.30.10	57505870	57507606
P17752	-	HGNC12008	11	TPH1	1.10.800.10	18042666	18054918
O14773	-	HGNC2073	11	TPP1	3.40.50.200	6635779	6640457
Q9Y4K3	-	HGNC12036	11	TRAF6	2.60.210.10	36511444	36511917	3.30.40.10	36516570	36522917
Q99816	-	HGNC15971	11	TSG101	3.10.110.10	18531134	18548362
P50607	+	HGNC12406	11	TUB	3.20.90.10	8117182	8122510
Q9H6E5	-	HGNC26184	11	TUT1	3.30.70.330	62349137	62358908
Q8TF42	+	HGNC29884	11	UBASH3B	2.30.30.40	122653901	122665413
O14933	-	HGNC12490	11	UBE2L6	3.10.110.10	57319833	57335080
Q14139	+	HGNC12499	11	UBE4A	3.30.40.10	118261511	118267116
Q9H347	-	HGNC12510	11	UBQLN3	3.10.20.90	5530476	5530754
Q8IX04	-	HGNC30866	11	UEVLD	3.40.50.720	18553869	18586539	3.90.110.10	18553869	18586539
Q9Y6N9	-	HGNC12597	11	USH1C	2.30.42.10	17548302	17565853	2.30.42.10	17544452	17547945
O75604	-	HGNC12618	11	USP2	3.90.70.10	119227547	119243439
P49765	+	HGNC12681	11	VEGFB	2.10.90.10	64002960	64004671
P30291	+	HGNC12761	11	WEE1	1.10.510.10	9598058	9608341	3.30.200.20	9598058	9608341
P46937	+	HGNC16262	11	YAP1	2.20.70.10	101985046	102033244
Q05516	+	HGNC12930	11	ZBTB16	3.30.710.10	113934038	113934400
P01023	-	HGNC7	12	A2M	2.60.40.690	9220421	9225048
O00763	+	HGNC85	12	ACACB	2.40.460.10	109680296	109704140	2.40.50.100	109637232	109639506	3.30.1490.20	109577859	109629681	3.30.470.20	109577859	109629681	3.90.1770.10	109577859	109629681	3.90.226.10	109680296	109704140
P16219	+	HGNC90	12	ACADS	1.10.540.10	121164870	121177248	1.20.140.10	121164870	121177248	2.40.110.10	121164870	121177248
P37023	+	HGNC175	12	ACVRL1	1.10.510.10	52307815	52314656	2.10.60.10	52306885	52307383	3.30.200.20	52307815	52314656
Q99490	-	HGNC16921	12	AGAP2	3.40.50.300	58126248	58129174
P05091	+	HGNC404	12	ALDH2	3.40.309.10	112204838	112247376	3.40.605.10	112204838	112247376
Q6NS38	-	HGNC32487	12	ALKBH2	2.60.120.590	109526013	109530425
Q9UJX3	-	HGNC17380	12	ANAPC7	1.25.40.10	110826395	110841431
Q7Z6G8	-	HGNC24600	12	ANKS1B	1.10.150.50	99225854	99548170	2.30.29.30	99145222	99194845
O14727	+	HGNC576	12	APAF1	1.10.10.10	99042138	99065477	1.10.533.10	99042138	99042556	3.40.50.300	99042138	99065477
P55064	+	HGNC638	12	AQP5	1.20.1080.10	50355804	50358957
Q9BRR9	-	HGNC14130	12	ARHGAP9	2.30.29.30	57869606	57870655
P52566	-	HGNC679	12	ARHGDIB	2.70.50.30	15095464	15103579
Q86VW2	+	HGNC30275	12	ARHGEF25	1.20.900.10	58007062	58009769	2.30.29.30	58007062	58009769
P40616	-	HGNC692	12	ARL1	3.40.50.300	101789420	101799723
Q8WYA1	+	HGNC18984	12	ARNTL2	3.30.450.20	27553625	27555564
P54687	-	HGNC976	12	BCAT1	3.20.10.10	24970980	25055921	3.30.470.10	24970980	25055921
P00736	-	HGNC1246	12	C1R	2.10.25.10	7242236	7242716	2.10.70.10	7187665	7241490	2.40.10.10	7187665	7241490
P09871	+	HGNC1247	12	C1S	2.10.25.10	7169819	7172408	2.10.70.10	7174421	7177952	2.40.10.10	7174421	7177952	2.60.120.290	7169819	7172408
Q96RR4	-	HGNC1470	12	CAMKK2	1.10.510.10	121686516	121708747	3.30.200.20	121686516	121708747
Q86VP6	+	HGNC30688	12	CAND1	1.25.10.10	67663498	67706607
P45973	-	HGNC1555	12	CBX5	2.40.50.40	54635595	54639995	2.40.50.40	54645923	54651382
O60563	-	HGNC1599	12	CCNT1	1.10.472.10	49088198	49110457
P01730	+	HGNC1678	12	CD4	1.20.5.900	6927619	6928492	2.60.40.10	6909499	6927594
Q07108	-	HGNC1694	12	CD69	3.10.100.10	9906079	9907836
P24941	+	HGNC1771	12	CDK2	1.10.510.10	56360793	56365406	3.30.200.20	56360793	56365406
P11802	-	HGNC1773	12	CDK4	1.10.510.10	58142310	58145499	3.30.200.20	58142310	58145499
P46527	+	HGNC1785	12	CDKN1B	4.10.365.10	12870840	12871091
Q14839	-	HGNC1919	12	CHD4	3.30.40.10	6709160	6709531	3.30.40.10	6707570	6709084
Q96EP1	-	HGNC20455	12	CHFR	2.60.200.20	133447328	133463874
Q9P126	-	HGNC24356	12	CLEC1B	3.10.100.10	10145768	10149584
Q6UXN8	+	HGNC26705	12	CLEC9A	3.10.100.10	10215662	10218228
P30622	-	HGNC10461	12	CLIP1	2.30.30.190	122839847	122862051	2.30.30.190	122862169	122862426
Q12860	+	HGNC2171	12	CNTN1	2.60.40.10	41316227	41330584	2.60.40.10	41410691	41419137
P02458	-	HGNC2200	12	COL2A1	2.10.70.10	48393702	48398019
P61923	+	HGNC2243	12	COPZ1	3.30.450.60	54718948	54741835
P14384	-	HGNC2311	12	CPM	2.60.40.1120	69250219	69326565	3.40.630.10	69250219	69326565
Q16630	+	HGNC13871	12	CPSF6	3.30.70.330	69633463	69652380
P78560	+	HGNC2340	12	CRADD	1.10.533.10	94072551	94244044
O14595	-	HGNC17077	12	CTDSP2	3.40.50.1000	58217387	58220873
O14529	+	HGNC19347	12	CUX2	1.10.260.40	111772400	111776268	1.10.260.40	111748216	111748479	1.10.260.40	111758472	111760380
P14920	+	HGNC2671	12	DAO	3.30.9.10	109278783	109294308	3.40.50.720	109278783	109294308
Q9H0S4	+	HGNC18682	12	DDX47	3.40.50.300	12966314	12976193
O43323	-	HGNC2865	12	DHH	3.30.1380.10	49484250	49488225
Q9NR28	-	HGNC21528	12	DIABLO	1.20.58.70	122692930	122709075
Q16828	-	HGNC3072	12	DUSP6	3.40.250.10	89744740	89745815	3.90.190.10	89743135	89744589
Q9BY84	-	HGNC17909	12	DUSP16	3.40.250.10	12653533	12674019
P63167	+	HGNC15476	12	DYNLL1	3.30.740.10	120934225	120936010
Q15075	-	HGNC3185	12	EEA1	1.20.5.390	93169789	93171356	3.30.40.10	93169789	93171356
Q14232	-	HGNC3257	12	EIF2B1	3.40.50.10470	124106305	124118103
P23588	+	HGNC3285	12	EIF4B	3.30.70.330	53412692	53416278
P09104	+	HGNC3353	12	ENO2	3.20.20.120	7025000	7031960	3.30.390.10	7025000	7031960
Q12929	-	HGNC3420	12	EPS8	1.10.150.50	15776094	15777290
P21860	+	HGNC3431	12	ERBB3	1.10.510.10	56489585	56493744	2.10.220.10	56474142	56489455	3.30.200.20	56489585	56493744	3.80.20.20	56474142	56489455
Q96DN0	-	HGNC26495	12	ERP27	3.40.30.10	15073892	15091366
P30040	+	HGNC13799	12	ERP29	1.20.1150.12	112451369	112460453	3.40.30.10	112451369	112460453
P41212	+	HGNC3495	12	ETV6	1.10.10.10	12037381	12043947	1.10.150.50	11905489	12006401
Q9GZV9	-	HGNC3680	12	FGF23	2.80.10.50	4479727	4488675
Q02790	+	HGNC3720	12	FKBP4	1.25.40.10	2907911	2912421	3.10.50.40	2904309	2912421
Q08050	-	HGNC3818	12	FOXM1	1.10.10.10	2973858	2977910
Q8WU20	+	HGNC16971	12	FRS2	2.30.29.30	69962841	69965210
Q9H0R8	+	HGNC4068	12	GABARAPL1	3.10.20.90	10365735	10374430
P04406	+	HGNC4141	12	GAPDH	3.30.360.10	6643999	6647333	3.40.50.720	6643999	6647333
P08151	+	HGNC4317	12	GLI1	3.30.160.60	57859646	57861863
Q9NZD2	-	HGNC24867	12	GLTP	1.10.3520.10	110290362	110318178
P21695	+	HGNC4455	12	GPD1	1.10.1040.10	50497834	50503299	3.40.50.720	50497834	50503299
Q7Z6J2	+	HGNC18707	12	GRASP	2.30.42.10	52403016	52407676
Q9Y3R0	-	HGNC18708	12	GRIP1	2.30.42.10	66909405	66923667
Q8WUI4	-	HGNC14067	12	HDAC7	3.40.800.20	48179251	48188556
O75146	+	HGNC18415	12	HIP1R	1.20.1410.10	123343988	123345700
P20823	+	HGNC11621	12	HNF1A	1.10.10.60	121416824	121432087	1.10.260.40	121416824	121432087
P09651	+	HGNC5031	12	HNRNPA1	3.30.70.330	54674592	54676361
P32754	-	HGNC5147	12	HPD	3.10.180.10	122277636	122296600
P10997	+	HGNC5329	12	IAPP	3.40.190.10	21531190	21531255
P01579	-	HGNC5438	12	IFNG	1.20.1250.10	68549150	68553325
P05019	-	HGNC5464	12	IGF1	1.10.100.10	102813334	102869495
P24592	+	HGNC5475	12	IGFBP6	4.10.800.10	53494825	53495948
Q9GZX6	-	HGNC14900	12	IL22	1.20.1250.10	68642581	68647143
Q9UNL4	-	HGNC19423	12	ING4	3.30.40.10	6760363	6761522
Q9NWZ3	+	HGNC17967	12	IRAK4	1.10.510.10	44166135	44180515	3.30.200.20	44166135	44180515
P08648	-	HGNC6141	12	ITGA5	2.130.10.130	54796104	54812858	2.60.40.1460	54796104	54812858
P21583	-	HGNC6343	12	KITLG	1.20.1250.10	88910132	88939581
P26715	-	HGNC6374	12	KLRC1	3.10.100.10	10599155	10602512
Q13241	+	HGNC6378	12	KLRD1	3.10.100.10	10462278	10467389
Q96E93	+	HGNC6380	12	KLRG1	3.10.100.10	9147750	9162121
P26718	-	HGNC18788	12	KLRK1	3.10.100.10	10525715	10532301
P13647	-	HGNC6442	12	KRT5	1.20.5.170	52910428	52911417
Q6VAB6	-	HGNC18610	12	KSR2	1.10.510.10	117905006	117962975	3.30.200.20	117905006	117962975
P00709	-	HGNC6480	12	LALBA	1.10.530.10	48961742	48963745
Q71RC2	+	HGNC24320	12	LARP4	1.10.10.10	50824292	50831582
P07195	-	HGNC6541	12	LDHB	3.40.50.720	21788478	21807601	3.90.110.10	21788478	21807601
Q9UHB6	-	HGNC24636	12	LIMA1	2.10.110.10	50571758	50586236
Q07954	+	HGNC6692	12	LRP1	4.10.400.10	57562958	57563089	4.10.400.10	57566962	57567087	4.10.400.10	57588884	57589454	4.10.400.10	57559608	57559874
Q5S007	+	HGNC18618	12	LRRK2	3.30.70.1390	40702306	40707785	3.40.50.300	40702306	40707785
P09960	-	HGNC6710	12	LTA4H	1.10.390.10	96394769	96429293	2.60.40.1730	96394769	96429287
P61626	+	HGNC6740	12	LYZ	1.10.530.10	69742243	69746996
Q00987	+	HGNC6973	12	MDM2	1.10.245.10	69202989	69218159	3.30.40.10	69233417	69233608
P50579	+	HGNC16672	12	METAP2	1.10.10.10	95867956	95907677	3.90.230.10	95867956	95907677
Q9UBP6	-	HGNC7030	12	METTL1	3.40.50.150	58162814	58165772
Q96EY8	-	HGNC19331	12	MMAB	1.20.1200.10	109994835	110009483
Q03426	+	HGNC7530	12	MVK	3.30.230.10	110012628	110034379	3.30.70.890	110012628	110034379
Q00872	+	HGNC7549	12	MYBPC1	2.60.40.10	102036360	102040664	2.60.40.10	102023280	102028360	2.60.40.10	102067376	102071893
P14649	+	HGNC29823	12	MYL6B	1.10.238.10	56548597	56551507
Q9Y618	-	HGNC7673	12	NCOR2	1.10.10.60	124904544	124911261
Q16621	-	HGNC7780	12	NFE2	1.10.880.10	54686400	54686639
P25208	-	HGNC7805	12	NFYB	1.10.20.10	104517003	104519971
Q96RI1	+	HGNC7967	12	NR1H4	1.10.565.10	100928784	100957264
P22736	+	HGNC7980	12	NR4A1	1.10.565.10	52450310	52452725
P20783	+	HGNC8023	12	NTF3	2.10.90.10	5603756	5604112
P00973	+	HGNC8086	12	OAS1	1.10.1410.20	113344845	113357294	3.30.460.10	113344845	113357294
Q15646	-	HGNC8090	12	OASL	3.10.20.90	121458387	121458608
P78380	-	HGNC8133	12	OLR1	3.10.100.10	10312481	10319337
P00439	-	HGNC8582	12	PAH	1.10.800.10	103232955	103288557
Q15366	+	HGNC8648	12	PCBP2	3.30.1370.10	53848615	53856267	3.30.1370.10	53862575	53873202
Q01064	+	HGNC8775	12	PDE1B	1.10.1300.10	54963355	54971019
P30086	+	HGNC8630	12	PEBP1	3.90.280.10	118574015	118582605
P50542	+	HGNC9719	12	PEX5	1.25.40.10	7355223	7362771
Q96HS1	+	HGNC28763	12	PGAM5	3.40.50.1240	133291520	133297411
O75747	+	HGNC8973	12	PIK3C2G	3.30.1520.10	18715779	18747460
Q8TBX8	+	HGNC23786	12	PIP4K2C	3.30.800.10	57985166	57995386
Q96J94	+	HGNC9007	12	PIWIL1	2.170.260.10	130833878	130839458
Q9HAU0	+	HGNC30036	12	PLEKHA5	2.30.29.30	19410403	19422805
Q14863	-	HGNC9224	12	POU6F1	1.10.260.40	51584059	51585514
P36873	-	HGNC9283	12	PPP1CC	3.60.21.10	111157983	111180511
Q9UKN5	-	HGNC9348	12	PRDM4	2.170.270.10	108135026	108140159
P54619	-	HGNC9385	12	PRKAG1	3.10.580.10	49396702	49397698
Q15185	-	HGNC16049	12	PTGES3	2.60.40.790	57064058	57081782
P29350	+	HGNC9658	12	PTPN6	3.30.505.10	7055889	7069515	3.90.190.10	7055889	7069542
Q06124	+	HGNC9644	12	PTPN11	3.30.505.10	112856916	112888302
P23467	-	HGNC9665	12	PTPRB	3.90.190.10	70931961	70949658
Q16827	+	HGNC9678	12	PTPRO	3.90.190.10	15718555	15747948
Q15256	-	HGNC9680	12	PTPRR	3.90.190.10	71032972	71094987
P61020	+	HGNC9784	12	RAB5B	3.40.50.300	56380787	56385921
Q9UL25	+	HGNC18263	12	RAB21	3.40.50.300	72148955	72179324
Q15286	-	HGNC9774	12	RAB35	3.40.50.300	120535114	120554453
Q9H0H5	-	HGNC9804	12	RACGAP1	1.10.555.10	50385856	50390824	3.30.60.20	50390849	50392952
P62826	+	HGNC9846	12	RAN	3.40.50.300	131357139	131360468
P61224	+	HGNC9857	12	RAP1B	3.40.50.300	69042505	69050913
P13631	-	HGNC9866	12	RARG	1.10.565.10	53605555	53608333
Q96A58	-	HGNC15980	12	RERG	3.40.50.300	15262121	15370422
Q8TAI7	-	HGNC21166	12	RHEBL1	3.40.50.300	49458888	49463567
O15034	-	HGNC30339	12	RIMBP2	2.30.30.40	130927119	130934796	2.30.30.40	130897212	130898800	2.60.40.10	130921662	130926416
Q92730	-	HGNC18314	12	RND1	3.40.50.300	49251877	49259537
Q15020	-	HGNC16860	12	SART3	3.30.70.330	108918175	108919385
P20132	-	HGNC10691	12	SDS	3.40.50.1100	113830748	113837512
Q96GA7	+	HGNC30404	12	SDSL	3.40.50.1100	113865818	113875878
Q9NQR1	+	HGNC29489	12	SETD8	2.170.270.10	123888171	123892328
P34897	+	HGNC10852	12	SHMT2	3.40.640.10	57624601	57628141	3.90.1150.10	57624601	57628141
Q96MF2	-	HGNC28423	12	STAC3	3.30.60.20	57642500	57642919
P51687	+	HGNC11460	12	SUOX	3.10.120.10	56397408	56397653
P21579	+	HGNC11509	12	SYT1	2.60.40.150	79685857	79842901
Q15633	+	HGNC11569	12	TARBP2	3.30.160.20	53898206	53898998	3.30.160.20	53895809	53896902
Q9UHD2	+	HGNC11584	12	TBK1	3.10.20.90	64875713	64878239
Q99593	-	HGNC11604	12	TBX5	2.60.40.820	114823282	114839721
Q13569	+	HGNC11700	12	TDG	3.40.470.10	104373773	104379433
P42166	+	HGNC11875	12	TMPO	1.10.720.40	98909646	98925555
P19438	-	HGNC11916	12	TNFRSF1A	1.10.533.10	6438480	6438967	2.10.50.10	6440040	6443328
Q63HR2	+	HGNC19737	12	TNS2	2.30.29.30	53456415	53457633	3.30.505.10	53455178	53456209
P60174	+	HGNC12009	12	TPI1	3.20.20.70	6976734	6979544
Q16881	+	HGNC12437	12	TXNRD1	3.30.390.30	104705104	104742196	3.50.50.60	104705104	104742196
P0CG48	-	HGNC12468	12	UBC	3.10.20.90	125396265	125396705	3.10.450.30	125396265	125396474
P61088	-	HGNC12492	12	UBE2N	3.10.110.10	93803817	93835659
P13051	+	HGNC12572	12	UNG	3.40.470.10	109536375	109547771
P45974	+	HGNC12628	12	USP5	1.10.8.10	6973002	6973260
Q9Y4E8	+	HGNC12613	12	USP15	3.30.2230.10	62654196	62719700
P11473	-	HGNC12679	12	VDR	1.10.565.10	48238681	48258904	3.30.50.10	48258881	48298367
Q9UBQ0	-	HGNC14340	12	VPS29	3.60.21.10	110929812	110939855
P04275	-	HGNC12726	12	VWF	3.40.50.410	6128170	6128808	3.40.50.410	6127561	6128151	3.40.50.410	6121294	6127536
Q9Y2Z4	-	HGNC24249	12	YARS2	1.10.240.10	32903019	32908714	3.40.50.620	32903019	32908714
Q8TBF4	-	HGNC29620	12	ZCRB1	3.30.70.330	42711213	42717903
Q8IUH5	+	HGNC18412	12	ZDHHC17	1.25.40.20	77191271	77216278
Q14587	+	HGNC13061	12	ZNF268	3.30.160.60	133779173	133779349	3.30.160.60	133780517	133780603	3.30.160.60	133780931	133781029
P20292	+	HGNC436	13	ALOX5AP	1.20.120.550	31287863	31330151
Q14155	+	HGNC15607	13	ARHGEF7	1.20.900.10	111885596	111927944	2.30.30.40	111870029	111870223
P35670	-	HGNC870	13	ATP7B	3.30.70.100	52544853	52548643	3.30.70.100	52536019	52544714
Q9H9S4	-	HGNC20290	13	CAB39L	1.25.10.10	49884952	49957033
P49336	+	HGNC1779	13	CDK8	1.10.510.10	26828779	26975701	3.30.200.20	26828779	26975701
P02462	-	HGNC2202	13	COL4A1	2.170.240.10	110802712	110814717
Q96IY4	-	HGNC2300	13	CPB2	3.30.70.340	46627751	46679074	3.40.630.10	46627751	46679074
Q9UI36	-	HGNC2663	13	DACH1	3.10.260.20	72440055	72440351
O15075	-	HGNC2700	13	DCLK1	3.10.20.230	36686266	36700129
P52799	-	HGNC3227	13	EFNB2	2.60.40.420	107148099	107187230
P10768	-	HGNC3465	13	ESD	3.40.50.1820	47345553	47365547
P08709	+	HGNC3544	13	F7	2.10.25.10	113765054	113771144	2.40.10.10	113771145	113773319
P00742	+	HGNC3528	13	F10	2.10.25.10	113783816	113798364	2.40.10.10	113803805	113803828	4.10.740.10	113783816	113798196
P31371	+	HGNC3687	13	FGF9	2.80.10.50	22246154	22275571
P17948	-	HGNC3763	13	FLT1	1.10.510.10	28886147	28913391	2.60.40.10	29008081	29041042	3.30.200.20	28886147	28913391
P36888	-	HGNC3765	13	FLT3	1.10.510.10	28589325	28608451	3.30.200.20	28589325	28608451
Q9Y2H6	+	HGNC20296	13	FNDC3A	2.60.40.10	49712888	49742848	2.60.40.10	49760142	49765186
Q12778	-	HGNC3819	13	FOXO1	1.10.10.10	41134829	41239898
Q9BVM4	-	HGNC25100	13	GGACT	3.10.490.10	101184386	101184844
P29033	-	HGNC4284	13	GJB2	1.20.1440.80	20763042	20763719
P13984	+	HGNC4653	13	GTF2F2	1.10.10.10	45841404	45857675
Q9UK53	+	HGNC6062	13	ING1	3.30.40.10	111372043	111372222
Q6UW63	-	HGNC19350	13	KDELC1	2.60.40.10	103446154	103450962
P13796	-	HGNC6528	13	LCP1	1.10.418.10	46701728	46708338
P49917	-	HGNC6601	13	LIG4	3.30.470.30	108862398	108862814	3.40.50.10190	108860883	108861656
Q8WWI1	+	HGNC6646	13	LMO7	2.30.42.10	76397755	76407201
Q8N448	-	HGNC20421	13	LNX2	2.30.42.10	28134074	28136767
Q99549	+	HGNC29810	13	MPHOSPH8	2.40.50.40	20208051	20216389
Q9Y217	-	HGNC7453	13	MTMR6	2.30.29.30	25825876	25861384
Q8NFP9	+	HGNC7648	13	NBEA	1.10.1540.10	36026372	36220467	2.30.29.40	36026372	36220467
P05165	+	HGNC8653	13	PCCA	3.30.1490.20	100861643	100915076
Q9HC56	-	HGNC8661	13	PCDH9	2.60.40.60	67801516	67801836
P22891	+	HGNC9460	13	PROZ	2.10.25.10	113814441	113826350	2.40.10.10	113814441	113826350
P10114	+	HGNC9861	13	RAP2A	3.40.50.300	98086725	98116645
P06400	+	HGNC9884	13	RB1	1.10.472.10	48942727	49039376
Q9BXT8	+	HGNC10060	13	RNF17	2.30.30.140	25418803	25419194
Q8IZP6	-	HGNC17267	13	RNF113B	3.30.40.10	98828551	98828754
Q9NZJ4	-	HGNC10519	13	SACS	1.10.287.110	23904874	23905098	1.20.120.330	23904277	23904696
Q8N0X7	-	HGNC18514	13	SPG20	1.20.58.280	36909634	36909942
Q9Y3M8	-	HGNC19164	13	STARD13	3.30.530.20	33679732	33684944
Q9Y6E0	-	HGNC11403	13	STK24	1.10.510.10	99114147	99171726	3.30.200.20	99114147	99171726
Q9Y2Z0	+	HGNC16987	13	SUGT1	2.60.40.790	53238173	53254122
Q9H7E2	+	HGNC20612	13	TDRD3	2.30.30.140	61102977	61103204
O14788	+	HGNC11926	13	TNFSF11	2.60.120.40	43175069	43181051
Q9Y275	+	HGNC11929	13	TNFSF13B	2.60.120.40	108922487	108959283
P13693	-	HGNC12022	13	TPT1	2.170.150.10	45912794	45915203
O95164	-	HGNC12504	13	UBL3	3.10.20.90	30341394	30423671
P15374	+	HGNC12515	13	UCHL3	3.40.532.10	76123957	76179945
Q9H1J1	+	HGNC20332	13	UPF3A	3.30.70.330	115047496	115051820
Q86VN1	-	HGNC20312	13	VPS36	1.10.10.10	52989967	53007879
P49753	+	HGNC18431	14	ACOT2	3.40.50.1820	74036080	74042214
Q8N9L9	+	HGNC19748	14	ACOT4	3.40.50.1820	74058664	74062355
P12814	-	HGNC163	14	ACTN1	1.10.418.10	69369196	69445685
P07311	-	HGNC179	14	ACYP1	3.30.70.100	75520149	75530255
O95433	+	HGNC1189	14	AHSA1	3.30.530.20	77931930	77935580
P31749	-	HGNC391	14	AKT1	1.10.510.10	105236680	105241993	2.30.29.30	105242054	105258979	3.30.200.20	105236680	105241993
P03950	+	HGNC483	14	ANG	3.10.130.10	21161796	21162164
O75843	-	HGNC556	14	AP1G2	2.60.40.1230	24028960	24030513
P27695	+	HGNC587	14	APEX1	3.60.10.10	20923808	20925664
P62330	+	HGNC659	14	ARF6	3.40.50.300	50360455	50360979
P78540	+	HGNC664	14	ARG2	3.40.800.10	68086764	68117559
P54252	-	HGNC7106	14	ATXN3	1.10.287.10	92549522	92572895
Q9UL15	-	HGNC941	14	BAG5	1.20.58.120	104026283	104026603
Q96KE9	+	HGNC19897	14	BTBD6	3.30.710.10	105715504	105716100
P62158	+	HGNC1442	14	CALM1	1.10.238.10	90866409	90871058
Q9Y5S2	-	HGNC1738	14	CDC42BPB	1.10.510.10	103442355	103523506	3.30.200.20	103442355	103523509
Q00532	-	HGNC1781	14	CDKL1	1.10.510.10	50857008	50883178	3.30.200.20	50857008	50883178
Q16667	+	HGNC1791	14	CDKN3	3.90.190.10	54863787	54886793
P12277	-	HGNC1991	14	CKB	1.10.135.10	103986203	103988829	3.30.590.10	103986203	103988829
P23946	-	HGNC2097	14	CMA1	2.40.10.10	24974724	24977383
Q9Y6A2	+	HGNC2641	14	CYP46A1	1.10.630.10	100157449	100193061
Q96LJ7	-	HGNC16445	14	DHRS1	3.40.50.720	24760363	24768305
Q9BTZ2	+	HGNC16985	14	DHRS4	3.40.50.720	24423052	24438077
Q9UPY3	-	HGNC17098	14	DICER1	1.10.1520.10	95557417	95562278
P05198	+	HGNC3265	14	EIF2S1	1.10.150.190	67831488	67850118	2.40.50.140	67831488	67850118	3.30.70.1130	67831497	67850118
P84090	-	HGNC3447	14	ERH	3.30.2260.10	69847257	69864949
Q92731	-	HGNC3468	14	ESR2	1.10.565.10	64699857	64727355
O95718	+	HGNC3473	14	ESRRB	3.30.50.10	76905985	76948420
Q00688	-	HGNC3719	14	FKBP3	3.10.50.40	45585403	45590816
P49356	+	HGNC3785	14	FNTB	1.50.10.20	65453672	65528027
P01100	+	HGNC3796	14	FOS	1.20.5.170	75747281	75747584
P30793	-	HGNC4193	14	GCH1	1.10.286.10	55310737	55369218	3.30.1130.10	55310737	55369218
Q86SX6	+	HGNC20134	14	GLRX5	3.40.30.10	96001529	96010438
Q9P2T1	+	HGNC4377	14	GMPR2	3.20.20.70	24702460	24707981
Q96EK6	-	HGNC19980	14	GNPNAT1	3.40.630.30	53245031	53251367
Q9NQX3	+	HGNC15465	14	GPHN	3.40.980.10	66975246	67389469
P18283	-	HGNC4554	14	GPX2	3.40.30.10	65406214	65409434
Q9P0R6	+	HGNC20343	14	GSKIP	3.30.2280.10	96848585	96852018
O43708	+	HGNC4643	14	GSTZ1	1.20.1050.10	77787512	77797535	3.40.30.10	77787512	77797535
P52655	-	HGNC4646	14	GTF2A1	1.10.287.100	81670406	81686858	2.30.18.10	81646569	81658888
P20718	-	HGNC4710	14	GZMH	2.40.10.10	25075811	25077612
Q16665	+	HGNC4910	14	HIF1A	3.30.450.20	62194240	62200947
P07900	-	HGNC5253	14	HSP90AA1	3.30.565.10	102552281	102605740
P54652	+	HGNC5235	14	HSPA2	3.30.30.30	65007571	65008728	3.30.420.40	65007571	65008728	3.90.640.10	65007571	65008728
P17931	+	HGNC6563	14	LGALS3	2.60.120.200	55605057	55611986
P80192	-	HGNC6861	14	MAP3K9	1.10.510.10	71215653	71275482	3.30.200.20	71215653	71275482
P27448	+	HGNC6897	14	MARK3	1.10.510.10	103871482	103933528	1.10.8.10	103871482	103933528	3.30.200.20	103871482	103933528
P61244	-	HGNC6913	14	MAX	4.10.280.10	65543355	65568268
P50281	+	HGNC7160	14	MMP14	2.110.10.10	23313014	23315032	3.40.390.10	23311204	23312929
P51948	+	HGNC7181	14	MNAT1	3.30.40.10	61201581	61263040
Q8N3R9	+	HGNC18669	14	MPP5	1.10.287.650	67746239	67759391
P11586	+	HGNC7432	14	MTHFD1	3.40.50.10860	64855146	64892510	3.40.50.720	64855146	64892510
[truncated: 993 more rows]

## Sheet: B2
UniProt ID	strand	HGNC ID	Chromosome	Approved Symbol	Pfam domains	coding region start	coding region start	Pfam domains	coding region start	coding region start	Pfam domains	coding region start	coding region start	Pfam domains	coding region start	coding region start	Pfam domains	coding region start	coding region start	Pfam domains	coding region start	coding region start	Pfam domains	coding region start	coding region start	Pfam domains	coding region start	coding region start	Pfam domains	coding region start	coding region start	Pfam domains	coding region start	coding region start	Pfam domains	coding region start	coding region start	Pfam domains	coding region start	coding region start	Pfam domains	coding region start	coding region start	Pfam domains	coding region start	coding region start	Pfam domains	coding region start	coding region start
Q5VUY0	+	HGNC32037	1	AADACL3	Abhydrolase_3	12779480	12785375	Abhydrolase_3	12785424	12785711
Q5VUY2	+	HGNC32038	1	AADACL4	Abhydrolase_3	12711316	12726377	Abhydrolase_3	12726393	12726665
P78363	-	HGNC34	1	ABCA4	ABC2_membrane_3	94520685	94528250	ABC_tran	94508374	94512556	ABC2_membrane_3	94476384	94487260	ABC_tran	94466646	94473825
Q9NRK6	-	HGNC41	1	ABCB10	ABC_membrane	229675215	229693888	ABC_tran	229654156	229666062
P28288	+	HGNC67	1	ABCD3	ABC_membrane_2	94930352	94953296	ABC_tran	94956783	94972150
P42684	-	HGNC77	1	ABL2	SH3_1	179095721	179100499	SH2	179090945	179095681	Pkinase_Tyr	179081477	179090827	F_actin_bind	179076855	179077157
P11310	+	HGNC89	1	ACADM	Acyl-CoA_dh_N	76198334	76200544	Acyl-CoA_dh_M	76205665	76215160	Acyl-CoA_dh_1	76215194	76228430
Q96P50	-	HGNC16754	1	ACAP3	BAR_3	1235240	1243188	PH	1233240	1234004	ArfGap	1231257	1231934	Ank_2	1229264	1229909
Q9H3P7	-	HGNC15453	1	ACBD3	ACBP	226352548	226374126	GOLD_2	226334316	226340221
Q9BR61	-	HGNC23339	1	ACBD6	ACBP	180461418	180471274	Ank_2	180257581	180382586
O00154	-	HGNC24157	1	ACOT7	4HBT	6393623	6409897	4HBT	6341254	6378569
Q8WXI4	+	HGNC18156	1	ACOT11	4HBT	55050478	55059646	4HBT	55063024	55066984	START	55069608	55096547
Q9NPH0	-	HGNC29609	1	ACP6	His_Phos_2	147120053	147142025
P68133	-	HGNC129	1	ACTA1	Actin	229567248	229568852
Q9H568	+	HGNC24018	1	ACTL8	Actin	18149507	18153011
P35609	+	HGNC164	1	ACTN2	CH	236850085	236883454	CH	236889235	236897791	Spectrin	236900479	236906261	Spectrin	236906289	236912426	Spectrin	236912454	236917288	Spectrin	236917316	236920851	EFhand_Ca_insen	236924417	236925904
Q8TDY3	+	HGNC24026	1	ACTRT2	Actin	2938266	2939381
Q13444	+	HGNC193	1	ADAM15	Pep_M12B_propep	155025155	155026853	Reprolysin	155028290	155029757	Disintegrin	155029803	155030425	ADAM_CR	155030432	155030881
Q9UKF2	-	HGNC208	1	ADAM30	Pep_M12B_propep	120438479	120438871	Reprolysin	120437780	120438352	Disintegrin	120437513	120437737	ADAM_CR	120437147	120437506
O75173	-	HGNC220	1	ADAMTS4	Pep_M12B_propep	161167874	161168269	Reprolysin	161163988	161166651	TSP_1	161163442	161163594	ADAM_spacer1	161161032	161161885
Q6UY14	+	HGNC19706	1	ADAMTSL4	TSP_1	150525437	150525538	ADAM_spacer1	150528719	150529465	TSP_1	150530425	150530592	TSP_1	150530602	150531089	TSP_1	150531621	150531909	TSP_1	150531922	150532368	PLAC	150532544	150532636
P55265	-	HGNC225	1	ADAR	z-alpha	154574514	154574714	z-alpha	154574040	154574234	dsrm	154570955	154573607	dsrm	154569637	154570394	dsrm	154562779	154569371	A_deamin	154557317	154562244
Q8NI60	+	HGNC16812	1	ADCK3	ABC1	227170607	227171840
Q96PN6	-	HGNC21285	1	ADCY10	Guanylate_cyc	167865914	167874269	Guanylate_cyc	167847700	167852841
O60241	-	HGNC944	1	ADGRB2	TSP_1	32209797	32209943	TSP_1	32208442	32208588	TSP_1	32207657	32207800	TSP_1	32207404	32207550	GAIN	32204489	32206111	GPS	32203821	32204218	7tm_2	32198602	32203343
O95490	+	HGNC18582	1	ADGRL2	Gal_Lectin	82372773	82402511	OLF	82408673	82409431	HRM	82416070	82416781	GAIN	82417641	82432236	GPS	82433728	82433862	7tm_2	82434880	82447630	Latrophilin	82450294	82456826
Q9HBW9	-	HGNC20822	1	ADGRL4	EGF_CA	79411962	79470754	GAIN	79392627	79403963	GPS	79387318	79387452	7tm_2	79357238	79386058
Q96A54	-	HGNC24040	1	ADIPOR1	HlyIII	202910772	202915611
P30542	+	HGNC262	1	ADORA1	7tm_1	203098045	203134911
Q9NX46	+	HGNC21304	1	ADPRHL2	ADP_ribosyl_GH	36554578	36558909
P30520	-	HGNC292	1	ADSS	Adenylsucc_synt	244572899	244615028
Q5VU57	-	HGNC25892	1	AGBL4	Peptidase_M14	49005360	49511329
P35573	+	HGNC321	1	AGL	hGDE_N	100327067	100327867	hDGE_amylase	100327877	100345517	hGDE_central	100346935	100356885	GDE_C	100358028	100387189
Q9BSE5	-	HGNC18407	1	AGMAT	Arginase	15900169	15911251
Q9UL18	+	HGNC3262	1	AGO1	ArgoN	36354078	36358859	ArgoL1	36359282	36359660	PAZ	36359673	36367143	ArgoL2	36367171	36367662	ArgoMid	36367820	36372665	Piwi	36372681	36384838
Q9H9G7	+	HGNC18421	1	AGO3	ArgoN	36411331	36437813	ArgoL1	36438983	36469964	PAZ	36469977	36475144	ArgoL2	36475172	36479344	ArgoMid	36479531	36492844	Piwi	36492860	36520729
Q9HCK5	+	HGNC18424	1	AGO4	ArgoN	36282515	36291075	ArgoL1	36291287	36291549	PAZ	36291562	36297481	ArgoL2	36297509	36297777	ArgoMid	36298053	36299720	Piwi	36299736	36316637
O00468	+	HGNC329	1	AGRN	NtA	955643	957817	Kazal_2	976137	976259	Kazal_2	976651	976776	Kazal_1	976908	977072	Kazal_2	977419	977541	Kazal_2	978714	978836	Kazal_2	978989	979111	Kazal_2	979262	979396	Kazal_2	979614	979815	Laminin_EGF	980744	980899	Laminin_EGF	981115	981366	Kazal_2	981445	981641	SEA	982712	983238	EGF	983637	983735	Laminin_G_1	984339	985024
P01019	-	HGNC333	1	AGT	Serpin	230838901	230846274
Q6RW13	+	HGNC13539	1	AGTRAP	AGTRAP	11796290	11810231
Q8WYP5	-	HGNC24618	1	AHCTF1	ELYS-bb	247062806	247094628	ELYS	247040350	247053274
O43865	+	HGNC344	1	AHCYL1	AdoHcyase	110553913	110558091	AdoHcyase	110558083	110564296	AdoHcyase_NAD	110559048	110561705
Q5TGY3	-	HGNC25230	1	AHDC1	DUF4683	27876700	27876930
Q96BJ3	-	HGNC25761	1	AIDA	Aida_N	222860953	222885634	Aida_C2	222843252	222849554
Q8N1P7	-	HGNC17295	1	AIM1L	Crystall	26672818	26673063	Crystall	26672518	26672778	Crystall	26672251	26672496	Crystall	26671975	26672214	Crystall	26671711	26671953	Ricin_B_lectin	26671315	26671698
O14862	-	HGNC357	1	AIM2	PYRIN	159043043	159043267	HIN	159033329	159036067
Q9UKB5	+	HGNC30801	1	AJAP1	AJAP1_PANP_C	4772471	4834487
P54819	-	HGNC362	1	AK2	ADK	33478883	33502371	ADK_lid	33478970	33486968
P27144	+	HGNC363	1	AK4	ADK	65614118	65691758	ADK_lid	65684547	65690479
Q9Y6K8	+	HGNC365	1	AK5	ADK	77759639	77806244	ADK	77952031	78001714
Q5T1N1	-	HGNC28398	1	AKNAD1	AKNA	109385871	109394307
P14550	+	HGNC380	1	AKR1A1	Aldo_ket_red	46027512	46034871
O43488	-	HGNC389	1	AKR7A2	Aldo_ket_red	19630754	19638497
O95154	-	HGNC390	1	AKR7A3	Aldo_ket_red	19609260	19615169
Q8NHP1	-	HGNC24056	1	AKR7L	Aldo_ket_red	19593829	19600534
Q9Y243	-	HGNC393	1	AKT3	PH	243809302	244006456	Pkinase	243708847	243801031	Pkinase_C	243668562	243675703
P30038	-	HGNC406	1	ALDH4A1	Aldedh	19199389	19215884
P49189	-	HGNC412	1	ALDH9A1	Aldedh	165634267	165667734
Q9Y672	+	HGNC23157	1	ALG6	Alg6_Alg8	63836688	63902631
Q96F25	-	HGNC28287	1	ALG14	Alg14	95448637	95538339
P05186	+	HGNC438	1	ALPL	Alk_phosphatase	21887208	21904036
O95076	-	HGNC449	1	ALX3	Homeobox	110604149	110607342
Q86WK6	-	HGNC20824	1	AMIGO1	LRR_8	110051168	110051350	LRR_8	110051024	110051206	I-set	110050460	110050720
P23109	-	HGNC468	1	AMPD1	A_deaminase	115215869	115222210
Q01433	+	HGNC469	1	AMPD2	A_deaminase	110170514	110173588
P04745	+	HGNC474	1	AMY1A	Alpha-amylase	104199103	104203238	Alpha-amylase_C	104205548	104207130
P04745	+	HGNC475	1	AMY1B	Alpha-amylase	104199103	104203238	Alpha-amylase_C	104205548	104207130
P04745	-	HGNC476	1	AMY1C	Alpha-amylase	104233975	104238110	Alpha-amylase_C	104230082	104231664
P04746	+	HGNC477	1	AMY2A	Alpha-amylase	104160198	104164455	Alpha-amylase_C	104166758	104168356
P19961	+	HGNC478	1	AMY2B	Alpha-amylase	104114375	104118102	Alpha-amylase_C	104120382	104122110
Q5VTE6	-	HGNC30534	1	ANGEL2	Exo_endo_phos	213168418	213181685
O95841	-	HGNC489	1	ANGPTL1	Fibrinogen_C	178820269	178822919
Q9Y5C1	+	HGNC491	1	ANGPTL3	Fibrinogen_C	63067442	63070467
O43827	+	HGNC24078	1	ANGPTL7	Fibrinogen_C	11252329	11255065
Q8N6S4	-	HGNC25374	1	ANKRD13C	Ank_2	70781205	70819817	GPCR_chapero_1	70728429	70771907
Q69YU3	+	HGNC27639	1	ANKRD34A	Ank_2	145473488	145473757
Q8N283	+	HGNC26323	1	ANKRD35	Ank_2	145555722	145558234	Ank_2	145556602	145558509	Ank_2	145558253	145560162
Q5TZF3	-	HGNC24786	1	ANKRD45	Ank_4	173616042	173628280
E5RJM6	-	HGNC42950	1	ANKRD65	Ank_2	1355770	1356252	Ank_5	1355839	1356207	Ank_2	1355482	1355787	Ank_2	1354683	1355463	Ank_2	1354584	1354862
Q9BTT0	-	HGNC16673	1	ANP32E	LRR_9	150201411	150208103
O76027	+	HGNC547	1	ANXA9	Annexin	150955871	150956819	Annexin	150956838	150958885	Annexin	150959126	150960661	Annexin	150960785	150967777
Q9Y6B7	-	HGNC572	1	AP4B1	Adaptin_N	114438595	114447323	B2-adapt-app_C	114437713	114438045
P02743	+	HGNC584	1	APCS	Pentaxin	159557902	159558483
Q96BI3	-	HGNC29509	1	APH1A	Aph-1	150238948	150241206
Q8N2Z9	+	HGNC23163	1	APITD1	CENP-S	10490623	10500470
Q8NCW5	+	HGNC18453	1	APOA1BP	YjeF_N	156561948	156563750
P02652	-	HGNC601	1	APOA2	ApoA-II	161192203	161192822
Q8WW27	-	HGNC32152	1	APOBEC4	APOBEC_N	183617235	183617777
Q96PS8	+	HGNC16029	1	AQP10	MIP	154293674	154296830
P84077	+	HGNC652	1	ARF1	Arf	228284822	228285699
Q52LW3	-	HGNC30207	1	ARHGAP29	C1_1	94650556	94650980	RhoGAP	94643626	94650483
Q7Z6I6	-	HGNC27414	1	ARHGAP30	RhoGAP	161023153	161029503
Q92974	-	HGNC682	1	ARHGEF2	RhoGEF	155931626	155934787	PH_13	155927631	155931517
Q9HCE6	+	HGNC25540	1	ARHGEF10L	RhoGEF	17948374	17953920
O15085	-	HGNC14580	1	ARHGEF11	PDZ	156948145	156954214	RGS-like	156928577	156937822	RhoGEF	156915882	156917689	PH_13	156913859	156914920
Q5VV41	+	HGNC15515	1	ARHGEF16	RhoGEF	3385997	3392554	PH	3394469	3396126	SH3_9	3396396	3397076
Q8IW93	-	HGNC26604	1	ARHGEF19	RhoGEF	16531650	16532834	SH3_9	16525174	16525725
O14497	+	HGNC11110	1	ARID1A	ARID	27094347	27097723	DUF3518	27106315	27107082
Q4LE39	-	HGNC15550	1	ARID4B	RBB1NT	235392653	235403710	ARID	235383841	235388065	Tudor-knot	235359393	235377216
Q96BM9	-	HGNC25192	1	ARL8A	Arf	202103612	202113678
P27540	-	HGNC700	1	ARNT	HLH	150811973	150814903	PAS	150804868	150808968	PAS_11	150790493	150801657
O15511	-	HGNC708	1	ARPC5	P16-Arc	183596678	183604766
Q5T4W7	+	HGNC727	1	ARTN	TGF_beta	44402111	44402404
Q9H2C2	+	HGNC29561	1	ARV1	Arv1	231114948	231131726
Q8TDY4	-	HGNC14987	1	ASAP3	BAR_3	23767921	23810535	PH	23763782	23767631	ArfGap	23762460	23763688	Ank_2	23759992	23761092
Q8WXJ9	-	HGNC19769	1	ASB17	SOCS_box	76384642	76384767
Q7RTU5	-	HGNC33169	1	ASCL5	HLH	201084092	201084244
Q9NR48	-	HGNC19088	1	ASH1L	SET	155330118	155340655	Bromodomain	155317650	155322529	BAH	155311807	155313988
Q8IZT6	-	HGNC19048	1	ASPM	ASH	197113125	197115458	CH	197091146	197093301	IQ	197086975	197087037	IQ	197074276	197086941	IQ	197074138	197074200	IQ	197073925	197073987	IQ	197073856	197073918	IQ	197073640	197073702	IQ	197073571	197073633	IQ	197073424	197073483	IQ	197073352	197073414	IQ	197073133	197073195	IQ	197073064	197073126	IQ	197072914	197072976	IQ	197072845	197072904
O14525	-	HGNC773	1	ASTN1	FXa_inhibition	176915213	176918420
Q9NVI7	+	HGNC25567	1	ATAD3A	DUF3523	1447727	1452576	DUF3523	1452655	1458231	AAA	1459297	1463162
Q5T9A4	+	HGNC24007	1	ATAD3B	DUF3523	1407343	1420503	AAA	1421568	1425724
Q5T2N8	+	HGNC32151	1	ATAD3C	DUF3523	1387432	1389832	AAA	1391249	1396217
P18847	+	HGNC785	1	ATF3	bZIP_1	212791478	212792786
P18850	+	HGNC791	1	ATF6	bZIP_1	161789426	161790865
Q96DT6	+	HGNC16040	1	ATG4C	Peptidase_C54	63282311	63307209
P05023	+	HGNC799	1	ATP1A1	Cation_ATPase_N	116927408	116930059	E1-E2_ATPase	116930765	116932906	Cation_ATPase	116933457	116936248	Cation_ATPase_C	116941653	116946578
P50993	+	HGNC800	1	ATP1A2	Cation_ATPase_N	160090985	160093152	E1-E2_ATPase	160093745	160098513	Cation_ATPase	160098823	160099984	Cation_ATPase_C	160105730	160109755
Q13733	+	HGNC14073	1	ATP1A4	Cation_ATPase_N	160122958	160124984	E1-E2_ATPase	160125847	160136389	Cation_ATPase	160136811	160141133	Cation_ATPase_C	160145983	160156138
P05026	+	HGNC804	1	ATP1B1	Na_K-ATPase	169076074	169100772
P23634	+	HGNC817	1	ATP2B4	Cation_ATPase_N	203652469	203667439	E1-E2_ATPase	203668653	203671182	E1-E2_ATPase	203672845	203677037	HAD	203677059	203683381	Cation_ATPase_C	203690325	203696537	ATP_Ca_trans_C	203696655	203708739	ATP_Ca_trans_C	203708740	203708895
P24539	+	HGNC840	1	ATP5F1	Mt_ATP-synt_B	111998731	112003577
Q96LB4	-	HGNC18265	1	ATP6V1G3	V-ATPase_G	198492556	198509773
Q99437	+	HGNC861	1	ATP6V0B	ATP-synt_C	44441793	44442319	ATP-synt_C	44442703	44443655
P98198	+	HGNC13534	1	ATP8B2	PhoLip_ATPase_N	154300618	154303401	E1-E2_ATPase	154303402	154309997	HAD	154313418	154317587	PhoLip_ATPase_C	154317803	154320960
Q9NQ11	-	HGNC30213	1	ATP13A2	P5-ATPase	17330855	17332192	E1-E2_ATPase	17322506	17326953	HAD	17314917	17322484
Q5TC12	-	HGNC18803	1	ATPAF1	ATP11	47101576	47133861
Q9UII2	+	HGNC871	1	ATPIF1	IATP	28562704	28564480
Q5T6C5	+	HGNC28713	1	ATXN7L2	SCA7	110030396	110031558
Q9H7T9	-	HGNC28363	1	AUNIP	AIB	26158644	26185772
Q9NWT8	-	HGNC24114	1	AURKAIP1	DUF1713	1309400	1309498
P47901	+	HGNC896	1	AVPR1B	7tm_1	206224591	206230881	DUF1856	206230951	206231106
Q5T1B0	+	HGNC26564	1	AXDND1	Ax_dynein_light	179351848	179380356
Q96A70	+	HGNC29957	1	AZIN2	Orn_Arg_deC_N	33549582	33562403	Orn_DAP_Arg_deC	33562413	33583697
Q8NCR0	-	HGNC28596	1	B3GALNT2	Galactosyl_T	235613649	235622031
O43825	-	HGNC917	1	B3GALT2	Galactosyl_T	193149615	193150199
Q96L58	+	HGNC17978	1	B3GALT6	Galactosyl_T	1167869	1168438
O60909	+	HGNC925	1	B4GALT2	Glyco_transf_7N	44447034	44450593	Glyco_transf_7C	44450603	44451061
O60512	-	HGNC926	1	B4GALT3	Glyco_transf_7N	161143698	161145621	Glyco_transf_7C	161142048	161143685
Q9NY43	-	HGNC954	1	BARHL2	Homeobox	91178165	91180241
Q9NR55	-	HGNC28915	1	BATF3	bZIP_1	212860210	212870400
Q96GW7	+	HGNC23059	1	BCAN	V-set	156616622	156616966	Xlink	156617302	156617886	Xlink	156618362	156618649	EGF	156626079	156626171	Lectin_C	156626792	156628056	Sushi	156628340	156628510
O75815	-	HGNC973	1	BCAR3	SH2	94054760	94057847	RasGEF	94032905	94047892
O75934	-	HGNC975	1	BCAS2	BCAS2	115110780	115124181
O00512	+	HGNC1008	1	BCL9	BCL9	147091009	147091125
O95999	-	HGNC989	1	BCL10	CARD	85736340	85741983
A8MW95	-	HGNC38606	1	BECN2	APG6	242121080	242122018
Q7L4P6	-	HGNC25668	1	BEND5	BEN	49193620	49202051
Q8NFU0	-	HGNC17106	1	BEST4	Bestrophin	45250576	45253355
P02818	+	HGNC1043	1	BGLAP	Gla	156212618	156212941
Q9H2G9	+	HGNC1065	1	BLZF1	DASH_Hsk3	169347640	169349728
Q7Z5Y6	+	HGNC21650	1	BMP8A	TGFb_propeptide	39957748	39987127	TGF_beta	39988101	39991464
P34820	-	HGNC1075	1	BMP8B	TGFb_propeptide	40230409	40254072	TGF_beta	40226096	40229436
Q7Z465	+	HGNC16976	1	BNIPL	BNIP2	151011316	151015824	CRAL_TRIO_2	151015825	151019139
Q9Y3E2	+	HGNC24263	1	BOLA1	BolA	149871730	149871951
O95861	-	HGNC1096	1	BPNT1	Inositol_P	220232203	220253166
Q58F21	+	HGNC1105	1	BRDT	Bromodomain	92428417	92433735	Bromodomain	92442795	92443835	BET	92446498	92446692	BRD4_CDT	92470779	92479816
Q9C0B6	+	HGNC13746	1	BRINP2	MACPF	177199202	177226451
Q76B58	-	HGNC22393	1	BRINP3	MACPF	190203604	190423866
Q5VW32	+	HGNC26512	1	BROX	BRO1	222889114	222904831
Q9NW68	-	HGNC25501	1	BSDC1	BSD	32843854	32846841
Q8WZ55	+	HGNC16512	1	BSND	Barttin	55464938	55474091
Q5XKL5	+	HGNC21019	1	BTBD8	BTB	92546270	92568129	BTB	92573482	92606750
C9JJ37	+	HGNC27145	1	BTBD19	BTB	45274547	45277740	BACK	45277753	45279141
Q96K17	+	HGNC30547	1	BTF3L4	NAC	52530548	52549119
P78543	+	HGNC1131	1	BTG2	BTG	203274759	203276455
Q9H246	+	HGNC15494	1	C1orf21	DUF4612	184446647	184588678
Q5SWX8	+	HGNC24299	1	C1orf27	ODR4-like	186348999	186375381
Q9BU76	-	HGNC19032	1	C1orf35	MMtag	228290385	228290906
Q9BWL3	-	HGNC29876	1	C1orf43	NICE-3	154184797	154192867
Q9BV19	+	HGNC28795	1	C1orf50	DUF2452	43233061	43241011
Q8N6N3	-	HGNC24871	1	C1orf52	DUF4660	85724300	85725252
Q8WWF1	+	HGNC26258	1	C1orf54	DUF4634	150245221	150252140
Q9BUN1	+	HGNC26045	1	C1orf56	PMSI1	151020390	151022916
Q8NEQ6	+	HGNC28339	1	C1orf64	DUF4654	16332428	16332838
Q96LT6	-	HGNC26319	1	C1orf74	DUF4504	209956172	209956918
Q6NZ36	-	HGNC26428	1	C1orf86	FANCA_interact	2116869	2125308	UBZ_FAAP20	2116752	2116856
Q6P1W5	+	HGNC28250	1	C1orf94	DUF4688	34663100	34684359
Q69YW2	+	HGNC30491	1	C1orf95	Spec3	226736735	226784681
Q5SY80	+	HGNC28491	1	C1orf101	CATSPERD	244724168	244803332
O95561	+	HGNC29591	1	C1orf105	DUF4548	172414240	172437728
Q3KP66	+	HGNC25599	1	C1orf106	DUF3338	200867490	200870118
Q9NX04	-	HGNC26039	1	C1orf109	CK2S	38152066	38156033
Q86UF4	-	HGNC28736	1	C1orf110	DUF4697	162824632	162829414
Q9NSG2	+	HGNC25565	1	C1orf112	DUF4487	169775192	169819426
Q9H7X2	+	HGNC25873	1	C1orf115	DUF4710	220863931	220870049
Q9BW04	-	HGNC28667	1	C1orf116	SARG	207195305	207200846
Q6ZSJ8	+	HGNC24789	1	C1orf122	DUF4726	38274104	38274742
Q9NWV4	-	HGNC26059	1	C1orf123	DUF866	53680339	53686012
Q8N9H9	-	HGNC26730	1	C1orf127	DUF4556	11017771	11042090
Q8NDD1	-	HGNC25332	1	C1orf131	DUF4602	231360138	231374712
Q5JVX7	-	HGNC32044	1	C1orf141	DUF4545	67562002	67592922	DUF4545	67558717	67581052
Q5VVC0	+	HGNC24032	1	C1orf146	DUF4580	92697002	92711198
Q96HA4	-	HGNC26062	1	C1orf159	DUF4501	1019712	1026260	DUF4501	1018275	1019318
Q5SNV9	+	HGNC25262	1	C1orf167	DUF4684	11840067	11849392
Q5VWT5	-	HGNC27295	1	C1orf168	hSH3	57185355	57189277
Q8IYL3	-	HGNC27915	1	C1orf174	UPF0688	3806544	3809559
Q5T7R7	+	HGNC28096	1	C1orf185	DUF4718	51567921	51613410
Q6ZWK4	-	HGNC25341	1	C1orf186	DUF4692	206239381	206243242
Q5VU69	-	HGNC32305	1	C1orf189	DUF4558	154171908	154178104
Q5T5A4	-	HGNC32331	1	C1orf194	DUF3695	109649214	109650655
Q9H425	-	HGNC25900	1	C1orf198	DUF4706	230979624	231004167
Q5VU13	-	HGNC27647	1	C1orf204	V-set	159827880	159828672	V-set	159826314	159827726
Q8IVY1	-	HGNC28755	1	C1orf210	LRR19-TM	43748494	43748748
Q8TAB5	-	HGNC26800	1	C1orf216	DUF4653	36181238	36181921
A1L170	+	HGNC34351	1	C1orf226	DUF4628	162348704	162353341
P02745	+	HGNC1241	1	C1QA	Collagen	22965337	22965498	C1q	22965508	22965885
P02746	+	HGNC1242	1	C1QB	Collagen	22986037	22987375	Collagen	22986127	22987477	C1q	22987484	22987858
P02747	+	HGNC1245	1	C1QC	Collagen	22970697	22973889	C1q	22973899	22974264
B7Z1M9	-	HGNC37210	1	C2CD4D	C2	151810451	151810771
P04003	+	HGNC1325	1	C4BPA	Sushi	207287450	207287626	Sushi	207288769	207297348	Sushi	207297528	207297707	Sushi	207300066	207300233	Sushi	207304896	207307756	Sushi	207307757	207307930	Sushi	207314453	207314617	Sushi	207317168	207317332
P20851	+	HGNC1328	1	C4BPB	Sushi	207263661	207263822	Sushi	207264997	207265158	Sushi	207269872	207271564
P07357	+	HGNC1352	1	C8A	Ldl_recept_a	57340730	57341808	MACPF	57349298	57378165	TSP_1	57383252	57383386
P07358	-	HGNC1353	1	C8B	TSP_1	57422484	57425739	Ldl_recept_a	57420426	57422486	MACPF	57399071	57415274	TSP_1	57395079	57395216
P23280	+	HGNC1380	1	CA6	Carb_anhydrase	9006015	9031021
Q9ULX7	+	HGNC1372	1	CA14	Carb_anhydrase	150232557	150235802
Q5VU97	+	HGNC29314	1	CACHD1	VWA_N	65047842	65095132	VWA	65098319	65113563	Cache_1	65113684	65119487	Cache_1	65131777	65138901
Q15878	+	HGNC1392	1	CACNA1E	Ion_trans	181453142	181680120	Ion_trans	181686336	181693673	Ion_trans	181706692	181726232	Ion_trans	181727182	181745299	GPHH	181745303	181752865	Ca_chan_IQ	181752866	181754524
Q13698	-	HGNC1397	1	CACNA1S	Ion_trans	201054678	201081319	Ion_trans	201043680	201052391	Ion_trans	201030421	201038697	Ion_trans	201019581	201029850	GPHH	201017761	201019577	Ca_chan_IQ	201016296	201017760
Q9HB71	+	HGNC30423	1	CACYBP	Siah-Interact_N	174969320	174973959	CS	174973960	174977780	SGS	174977793	174979191
Q8N126	+	HGNC17601	1	CADM3	I-set	159159563	159162414	C2-set_2	159162433	159163697	Ig_2	159163737	159166747
Q8TD86	+	HGNC24193	1	CALML6	EF-hand_8	1847946	1848234	EF-hand_7	1848268	1848602
Q96NX5	+	HGNC14585	1	CAMK1G	Pkinase	209768395	209784813
Q7Z7J9	-	HGNC24190	1	CAMK2N1	CaM-KIIN	20810144	20811871
Q08AD1	+	HGNC29188	1	CAMSAP2	CAMSAP_CH	200801346	200801961	CAMSAP_CC1	200818109	200818276	CAMSAP_CKK	200826436	200827121
Q9Y6Y1	+	HGNC18806	1	CAMTA1	CG-1	6885241	7700495	TIG	7725221	7737735	IQ	7811349	7811396
Q01518	+	HGNC20040	1	CAP1	CAP_N	40525031	40535441	CAP_C	40535505	40537196
P17655	+	HGNC1479	1	CAPN2	Peptidase_C2	223900478	223940549	Calpain_III	223940589	223947175	EF-hand_8	223949951	223957596
A6NHC0	-	HGNC1485	1	CAPN8	Peptidase_C2	223807100	223853212	Calpain_III	223722864	223807060
O14815	+	HGNC1486	1	CAPN9	Peptidase_C2	230883369	230914770	Calpain_III	230914810	230916446
P52907	+	HGNC1488	1	CAPZA1	F-actin_cap_A	113189832	113212739
P47756	-	HGNC1491	1	CAPZB	F_actin_cap_B	19671701	19810757
P55211	-	HGNC1511	1	CASP9	CARD	15844746	15850679	Peptidase_C14	15819449	15833542
P31415	+	HGNC1512	1	CASQ1	Calsequestrin	160160572	160171163
O14958	-	HGNC1513	1	CASQ2	Calsequestrin	116243915	116311158
Q7RTX7	+	HGNC23220	1	CATSPER4	Ion_trans	26517835	26526516
Q5T0F9	-	HGNC29386	1	CC2D1B	C2	52819316	52821493
Q6YP21	-	HGNC33238	1	CCBL2	Aminotran_1_2	89401892	89434468
Q8N300	-	HGNC29204	1	CCDC23	CCDC23	43273087	43282205
Q8N4L8	+	HGNC28688	1	CCDC24	CCDC24	44457611	44461338
Q9BUN5	+	HGNC28163	1	CCDC28B	DUF4061	32669571	32670225
Q5VVM6	+	HGNC26103	1	CCDC30	DUF4686	43031970	43110418
Q8N715	+	HGNC26654	1	CCDC185	DUF4659	223567568	223568677
Q96S94	-	HGNC20570	1	CCNL2	Cyclin_N	1330791	1334523	Cyclin_C	1325688	1330784
Q6IQ19	-	HGNC29578	1	CCSAP	CCSAP	229460987	229478193
P49368	-	HGNC1616	1	CCT3	Cpn60_TCP1	156279046	156304705
P06126	+	HGNC1634	1	CD1A	MHC_I_3	158224460	158226059	C1-set	158226605	158226841
P29016	-	HGNC1635	1	CD1B	MHC_I_3	158299654	158301212	C1-set	158299172	158299408
P29017	+	HGNC1636	1	CD1C	MHC_I_3	158259855	158262142	C1-set	158262406	158262651
P15813	+	HGNC1637	1	CD1D	MHC_I_3	158150892	158152087	C1-set	158152697	158152933
P15812	+	HGNC1638	1	CD1E	MHC_I_3	158323836	158325346	C1-set	158325652	158325879
P06729	+	HGNC1639	1	CD2	V-set	117297273	117297572	C2-set	117303044	117307107
O43866	-	HGNC1690	1	CD5L	SRCR	157805625	157805921	SRCR	157804197	157804493	SRCR	157802982	157803281
P28906	-	HGNC1662	1	CD34	CD34_antigen	208061085	208070866
P15529	+	HGNC6953	1	CD46	Sushi	207930364	207930543	Sushi	207930893	207933065	Sushi	207934602	207934787	Sushi	207940366	207940533
P09326	-	HGNC1683	1	CD48	V-set	160654677	160654973
P31358	+	HGNC1804	1	CD52	CD52	26646668	26646790
P19397	+	HGNC1686	1	CD53	Tetraspannin	111434052	111441787
P08174	+	HGNC2665	1	CD55	Sushi	207495732	207495908	Sushi	207497909	207498091	Sushi	207498975	207500178	Sushi	207504461	207504637
Q9UIB8	-	HGNC1704	1	CD84	Ig_3	160523733	160523924
Q93033	+	HGNC5949	1	CD101	V-set	117552504	117554176	V-set	117554198	117554566	I-set	117559720	117560079	V-set	117564218	117564568	V-set	117568160	117568516
O95971	-	HGNC17013	1	CD160	Ig_3	145704068	145704337
Q6UWJ8	-	HGNC32043	1	CD164L2	MGC-24	27705998	27709088
Q9BZW8	-	HGNC18171	1	CD244	Receptor_2B4	160811288	160811688
P20963	-	HGNC1677	1	CD247	TCR_zetazeta	167408625	167409980	ITAM	167407842	167408594	ITAM	167403265	167404649	ITAM	167400938	167402274
P32320	+	HGNC1712	1	CDA	dCMP_cyt_deam_1	20915656	20944974
O00311	+	HGNC1745	1	CDC7	Pkinase	91973467	91978705	Pkinase	91980526	91989713	Pkinase	91989756	91989974
Q9UNH5	+	HGNC1718	1	CDC14A	DSPn	100818547	100908492	DSPc	100928218	100949854
Q12834	+	HGNC1723	1	CDC20	WD40	43826450	43826566	WD40	43826588	43826871	WD40	43827962	43828713
P60953	+	HGNC1736	1	CDC42	Ras	22404984	22417968
Q5VT25	-	HGNC1737	1	CDC42BPA	Pkinase	227333303	227441805	Pkinase_C	227330647	227333248	KELK	227300437	227307566	DMPK_coil	227259912	227261658	C1_1	227223249	227227927	CNH	227211024	227219013
Q6P1J9	+	HGNC16783	1	CDC73	CDC73_N	193091331	193119496	CDC73_C	193181230	193219809
Q53HL2	+	HGNC14629	1	CDCA8	Nbl1_Borealin_N	38158420	38161586	Borealin	38167489	38174020
Q5VXM1	-	HGNC27297	1	CDCP2	CUB	54610145	54610477	CUB	54606777	54607100	CUB	54605432	54605773
Q9UQ88	-	HGNC1730	1	CDK11A	Pkinase	1634644	1637149
P21127	-	HGNC1729	1	CDK11B	Pkinase	1571207	1573177
Q07002	+	HGNC8751	1	CDK18	Pkinase	205494291	205499434
P42773	+	HGNC1789	1	CDKN2C	Ank_5	51439700	51439867
P08217	+	HGNC24609	1	CELA2A	Trypsin	15783625	15794027
P08218	+	HGNC29995	1	CELA2B	Trypsin	15802996	15813926
P09093	+	HGNC15944	1	CELA3A	Trypsin	22329537	22336344
P08861	+	HGNC15945	1	CELA3B	Trypsin	22304903	22313170
Q5SZQ8	-	HGNC11967	1	CELF3	RRM_1	151682261	151688471	RRM_1	151680402	151681812	RRM_1	151677558	151678423
Q9HCU4	+	HGNC3231	1	CELSR2	Cadherin	109793257	109793541	Cadherin	109793581	109793871	Cadherin	109793911	109794189	Cadherin	109794229	109794504	Cadherin	109794544	109794810	Cadherin	109794850	109795119	Cadherin	109795159	109795437	Cadherin	109795477	109795743	Laminin_G_2	109804136	109805545	EGF	109805787	109805879	Laminin_G_2	109806328	109807096	Laminin_EGF	109808399	109808539	GAIN	109810500	109812100	GPS	109812182	109812421	7tm_2	109812564	109814233
P49454	+	HGNC1857	1	CENPF	CENP-F_N	214787098	214795477	CENP-F_leu_zip	214818878	214819306	CENP-F_leu_zip	214819592	214820011	CENP-F_leu_zip	214820138	214820557	CENP-F_C_Rb_bdg	214836979	214837119
Q8N0S6	-	HGNC17879	1	CENPL	CENP-L	173772229	173775605
Q5SW79	-	HGNC28920	1	CEP170	FHA	243375191	243388515	CEP170_C	243289987	243328836
Q5VT06	+	HGNC24238	1	CEP350	CAP_GLY	180062735	180062929
Q9Y6K0	+	HGNC24289	1	CEPT1	CDP-OH_P_transf	111690583	111702136
Q96G23	-	HGNC14076	1	CERS2	Homeobox	150940587	150940953	TRAM_LAG1_CLN8	150938978	150940574
Q9UL16	-	HGNC17229	1	CFAP45	TPH	159842334	159857659
Q96MR6	+	HGNC26485	1	CFAP57	WD40	43663245	43663352	WD40	43665136	43672468
P08603	+	HGNC4883	1	CFH	Sushi	196642113	196642289	Sushi	196642995	196645191	Sushi	196646614	196646793	Sushi	196648761	196648919	Sushi	196654202	196654363	Sushi	196658558	196659200	Sushi	196659198	196659359	Sushi	196682870	196683043	Sushi	196684728	196684895	Sushi	196694259	196694423	Sushi	196695614	196695778	Sushi	196695905	196696066	Sushi	196705971	196706132	Sushi	196706616	196706786	Sushi	196709757	196709918
Q03591	+	HGNC4888	1	CFHR1	Sushi	196794615	196794797	Sushi	196795964	196796125	Sushi	196797208	196797372	Sushi	196799644	196799808	Sushi	196800932	196801117
P36980	+	HGNC4890	1	CFHR2	Sushi	196918593	196918775	Sushi	196919987	196920148	Sushi	196927035	196927199	Sushi	196928016	196928198
Q02985	+	HGNC16980	1	CFHR3	Sushi	196748300	196748934	Sushi	196748932	196749093	Sushi	196757351	196757524	Sushi	196759189	196759353
Q92496	+	HGNC16979	1	CFHR4	Sushi	196871559	196874245	Sushi	196874243	196874416	Sushi	196875996	196876163	Sushi	196876460	196876624	Sushi	196879422	196881877	Sushi	196881875	196882048	Sushi	196883630	196883797	Sushi	196884100	196884264
Q9BXR6	+	HGNC24668	1	CFHR5	Sushi	196952023	196952205	Sushi	196953096	196953257	Sushi	196963218	196963382	Sushi	196964861	196965025	Sushi	196965166	196965327	Sushi	196971629	196971790	Sushi	196973805	196973969
Q9P2M7	+	HGNC17429	1	CGN	Myosin_tail_1	151503007	151509346
Q86WJ1	+	HGNC1916	1	CHD1L	SNF2_N	146724295	146739173	Helicase_C	146740494	146747123
Q8TDI0	-	HGNC16816	1	CHD5	CHDNT	6214864	6215725	PHD	6209126	6209433	PHD	6206925	6209044	Chromo	6204088	6206299	SNF2_N	6194792	6202601	Helicase_C	6189102	6194264	DUF1087	6186635	6188116	DUF1086	6184119	6185834	CHDCT2	6166708	6171889
P36222	-	HGNC1932	1	CHI3L1	Glyco_hydro_18	203148653	203154504
Q15782	+	HGNC1933	1	CHI3L2	Glyco_hydro_18	111773372	111784908
Q9BZP6	+	HGNC17432	1	CHIA	Glyco_hydro_18	111854820	111862008	CBM_14	111862945	111863085
Q13231	-	HGNC1936	1	CHIT1	Glyco_hydro_18	203186933	203194989	CBM_14	203186019	203186159
P26374	-	HGNC1941	1	CHML	GDI	241798825	241799055	GDI	241797427	241798443
P20309	+	HGNC1952	1	CHRM3	7tm_1	240071004	240072383
P17787	+	HGNC1962	1	CHRNB2	Neur_chan_LBD	154541958	154544001	Neur_chan_memb	154544020	154548333
Q9Y3Y2	+	HGNC24511	1	CHTOP	FoP_duplication	153615807	153617730
Q8N365	+	HGNC25200	1	CIART	DUF4664	150255951	150259315
Q96RK1	-	HGNC18696	1	CITED4	CITED	41327247	41327552
P61024	+	HGNC19083	1	CKS1B	CKS	154947237	154951232
A8K7I4	+	HGNC2015	1	CLCA1	CLCA	86934727	86965713	VWA_2	86951209	86957006
Q9UQC9	+	HGNC2016	1	CLCA2	CLCA	86890027	86921150	VWA_2	86900387	86907187
Q14CN2	+	HGNC2018	1	CLCA4	CLCA	87012872	87045995	VWA_2	87031668	87038355
Q96S66	-	HGNC29675	1	CLCC1	MCLC	109477294	109493052
P51797	+	HGNC2024	1	CLCN6	Voltage_CLC	11882817	11894564	CBS	11896031	11896168	CBS	11898494	11900244
P51800	+	HGNC2026	1	CLCNKA	Voltage_CLC	16351332	16357089	CBS	16358221	16358756
P51801	+	HGNC2027	1	CLCNKB	Voltage_CLC	16373104	16378826	CBS	16380150	16381988
Q8N6F1	-	HGNC2040	1	CLDN19	PMP22_Claudin	43201628	43205724
Q9Y696	+	HGNC13518	1	CLIC4	GST_N_3	25124251	25153501	GST_C_2	25153592	25167335
P49760	-	HGNC2069	1	CLK2	Pkinase	155233071	155238498
O94985	-	HGNC17447	1	CLSTN1	Cadherin	9809846	9811674	Laminin_G_3	9797592	9804593
P30085	+	HGNC18170	1	CMPK1	ADK	47799639	47840622
Q8TBE1	+	HGNC26802	1	CNIH3	Cornichon	224804895	224922406
Q9P003	+	HGNC25013	1	CNIH4	Cornichon	224544633	224559123
Q969H4	+	HGNC19700	1	CNKSR1	SAM_1	26504051	26507095	CRIC_ras_sig	26507227	26508860	PH	26511558	26514755
Q15417	-	HGNC2157	1	CNN3	CH	95367685	95369061	Calponin	95365010	95367235	Calponin	95363603	95364964	Calponin	95363486	95363560
P34972	-	HGNC2160	1	CNR2	7tm_1	24201210	24201959
Q6PJW8	+	HGNC26486	1	CNST	Consortin_C	246811337	246829198
Q02246	+	HGNC2172	1	CNTN2	ig	205027126	205027471	Ig_3	205027728	205028357	I-set	205028731	205030544	I-set	205030998	205031693	I-set	205033470	205033874	ig	205034232	205035027	fn3	205035577	205036344	fn3	205038627	205039158	fn3	205039562	205041230
Q5JTJ3	+	HGNC18025	1	COA6	COX6B	234509351	234510099
Q96BR5	-	HGNC25716	1	COA7	Sel1	53153778	53158443	Sel1	53153649	53153765	Sel1	53153538	53153648
Q14746	+	HGNC6546	1	COG2	COG2	230778395	230800289	DUF3510	230824231	230827292
P25067	-	HGNC2216	1	COL8A2	Collagen	36564765	36564923	C1q	36563181	36563555
Q14055	-	HGNC2218	1	COL9A2	Collagen	40779882	40782796	Collagen	40778142	40780031	Collagen	40777177	40778150	Collagen	40775965	40776951	Collagen	40770468	40773388	Collagen	40769306	40770062	Collagen	40768833	40769501	Collagen	40767520	40768436	Collagen	40766922	40767528
P12107	-	HGNC2186	1	COL11A1	Laminin_G_2	103496767	103544397	Collagen	103481268	103487303	Collagen	103471823	103480095	Collagen	103470169	103471843	Collagen	103468341	103471431	Collagen	103468016	103470198	Collagen	103355016	103363733	Collagen	103354141	103355063	COLFI	103343619	103352533
Q07092	-	HGNC2193	1	COL16A1	Collagen	32157222	32158369	Collagen	32151350	32154517	Collagen	32149814	32151259	Collagen	32148543	32149330	Collagen	32134426	32138099	Collagen	32119233	32119593
Q17RW2	-	HGNC20821	1	COL24A1	Collagen	86557961	86590559	Collagen	86523655	86557978	Collagen	86499579	86524841	Collagen	86437043	86488225	Collagen	86435918	86482886	Collagen	86377107	86453288	Collagen	86375680	86437030	Collagen	86372897	86426972	Collagen	86308061	86334254	Collagen	86306934	86313400	Collagen	86289227	86306942	Collagen	86282482	86289384	Collagen	86211180	86249204	COLFI	86200638	86210483	COLFI	86196234	86203083
Q8IYK4	-	HGNC16790	1	COLGALT2	Glyco_tranf_2_4	183942830	184006307	Glyco_transf_25	183909740	183923903
P53621	-	HGNC2230	1	COPA	WD40	160305103	160310003	WD40	160303415	160305093	WD40	160302244	160303405	WD40	160293227	160295352	WD40	160283790	160283903	Coatomer_WDAD	160265928	160281721	COPI_C	160259976	160265585
O00230	+	HGNC2257	1	CORT	Somatostatin	10511596	10511646
Q5RI15	+	HGNC26970	1	COX20	DUF3767	244999032	245006430
Q5TA45	-	HGNC26052	1	CPSF3L	Lactamase_B_6	1250281	1256440	Beta-Casp	1248456	1249714	RMMBL	1248206	1248419
P23786	+	HGNC2330	1	CPT2	Carn_acyltransf	53662760	53679234
Q5TA50	+	HGNC28116	1	CPTP	GLTP	1262369	1263029
P17927	+	HGNC2334	1	CR1	Sushi	207679254	207679424	Sushi	207680067	207684995	Sushi	207696964	207697164	Sushi	207697180	207697347	Sushi	207700100	207700270	Sushi	207700386	207702142	Sushi	207705533	207705733	Sushi	207706759	207706929	Sushi	207707550	207713407	Sushi	207715535	207715735	Sushi	207715751	207715918	Sushi	207718655	207718825	Sushi	207718941	207720697	Sushi	207724088	207724288	Sushi	207725314	207725484
Q2VPA4	+	HGNC2335	1	CR1L	Sushi	207850739	207850909	Sushi	207851551	207857298	Sushi	207867706	207867906	Sushi	207867922	207868089	Sushi	207870850	207871020	Sushi	207871124	207872615	Sushi	207874872	207881604	Sushi	207890817	207891017
P20023	+	HGNC2336	1	CR2	Sushi	207639879	207640058	Sushi	207640083	207640250	Sushi	207641886	207642056	Sushi	207642153	207642573	Sushi	207643048	207643248	Sushi	207643273	207643440	Sushi	207644087	207644257	Sushi	207646125	207646325	Sushi	207646350	207646517	Sushi	207647066	207648182	Sushi	207648207	207648374	Sushi	207648396	207649583	Sushi	207649596	207651231
P29373	-	HGNC2339	1	CRABP2	Lipocalin	156669820	156675225
P82279	+	HGNC2343	1	CRB1	EGF	197297701	197297796	EGF	197297935	197298027	EGF	197298049	197313418	EGF	197313440	197313532	EGF	197313554	197316512	EGF	197316534	197325977	EGF	197325999	197390137	EGF	197390159	197390260	EGF	197390291	197390395	Laminin_G_2	197390498	197390911	EGF	197390984	197391076	Laminin_G_2	197396682	197397035	EGF	197397126	197398662	Laminin_G_2	197403931	197404308	EGF	197404420	197404512
Q9UGL9	+	HGNC29875	1	CRCT1	NICE-1	152487884	152488153
Q8TEY5	+	HGNC18854	1	CREB3L4	bZIP_1	153945454	153945916
O75629	-	HGNC2351	1	CREG1	Pyrid_oxidase_2	167515348	167522830
Q9UBG3	-	HGNC1230	1	CRNN	S_100	152384574	152384699
Q5TZA2	+	HGNC21299	1	CROCC	Rootletin	17256455	17263177
P02741	-	HGNC2367	1	CRP	Pentaxin	159683329	159683916
Q53ET0	-	HGNC27301	1	CRTC2	TORC_N	153927579	153930921	TORC_M	153924524	153926014	TORC_C	153920590	153920951
Q08257	-	HGNC2419	1	CRYZ	ADH_N	75184942	75190402	ADH_zinc_N_2	75171988	75175837
O75534	-	HGNC29905	1	CSDE1	CSD	115282379	115284209	CSD	115276714	115279460	CSD	115273218	115275367	CSD	115268863	115269650	CSD	115262339	115263329	SUZ-C	115261356	115262284
P09603	+	HGNC2432	1	CSF1	CSF-1	110453646	110466005	CSF-1	110466057	110467808
Q99062	-	HGNC2439	1	CSF3R	Lep_receptor_Ig	36941008	36941268	fn3	36933450	36933816
Q7Z408	-	HGNC19290	1	CSMD2	CUB	34498198	34554785	Sushi	34401364	34401537	CUB	34312488	34383890	Sushi	34285317	34286121	CUB	34254204	34276456	Sushi	34238173	34238334	CUB	34208884	34209201	Sushi	34204744	34204917	CUB	34190953	34192280	Sushi	34190120	34190281	CUB	34181889	34189907	Sushi	34180190	34180357	CUB	34166120	34174852	Sushi	34164356	34164526	CUB	34128493	34158650
P21291	-	HGNC2469	1	CSRP1	LIM	201459386	201465403	LIM	201453897	201458038
Q01459	-	HGNC2496	1	CTBS	Glyco_hydro_18	85020759	85036381
P32929	+	HGNC2501	1	CTH	Cys_Met_Meta_PP	70877153	70904503
Q9NSA3	-	HGNC16913	1	CTNNBIP1	ICAT	9910784	9932121
P17812	+	HGNC2519	1	CTPS1	CTP_synth_N	41448966	41461699	GATase	41463118	41475208
Q99895	+	HGNC2523	1	CTRC	Trypsin	15766843	15772238
P14091	+	HGNC2530	1	CTSE	A1_Propeptide	206317637	206318389	Asp	206319104	206331176
P43235	-	HGNC2536	1	CTSK	Inhibitor_I29	150778477	150779205	Peptidase_C1	150769280	150778392
P25774	-	HGNC2545	1	CTSS	Inhibitor_I29	150727611	150737157	Peptidase_C1	150705527	150727532
Q9P2B4	+	HGNC25330	1	CTTNBP2NL	CortBP2	112958791	112998678
Q9UHQ9	-	HGNC13397	1	CYB5R1	FAD_binding_6	202934508	202935899	NAD_binding_1	202931705	202933757
Q6IPT4	-	HGNC32220	1	CYB5RL	Oxidored-like	54661118	54661255	FAD_binding_6	54649845	54656532	NAD_binding_1	54640339	54645009
Q8N8Q1	+	HGNC26804	1	CYB561D1	Cytochrom_B561	110037776	110038764
P51589	-	HGNC2634	1	CYP2J2	p450	60359337	60392288
Q02928	-	HGNC2642	1	CYP4A11	p450	47395831	47406954
Q5TCH4	+	HGNC20575	1	CYP4A22	p450	47603308	47614424
P13584	+	HGNC2644	1	CYP4B1	p450	47264889	47284450
Q8N118	+	HGNC20244	1	CYP4X1	p450	47489625	47515822
Q86W10	+	HGNC20583	1	CYP4Z1	p450	47533301	47583588
O00622	+	HGNC2654	1	CYR61	IGFBP	86047060	86047218	VWC	86047631	86047822	Cys_knot	86048426	86048704
O75553	-	HGNC2661	1	DAB1	PID	57537248	57611045
P51398	+	HGNC2673	1	DAP3	DAP3	155695197	155708018
Q6PI48	+	HGNC25538	1	DARS2	tRNA_anti-codon	173795893	173800723	tRNA-synt_2	173802517	173826729	GAD	173810049	173822498
P11182	-	HGNC2698	1	DBT	Biotin_lipoyl	100696307	100701049	E3_binding	100681692	100684225	2-oxoacid_dh	100661822	100681568
Q5TAQ9	-	HGNC24891	1	DCAF8	WD40	160209546	160209662	WD40	160192491	160194276	WD40	160188683	160192481
A2VCK2	+	HGNC32576	1	DCDC2B	DCX	32674773	32674949	DCX	32677714	32678178
Q9H816	+	HGNC17641	1	DCLRE1B	Lactamase_B_2	114448245	114450806	DRMBL	114453857	114454117
Q5T197	+	HGNC26539	1	DCST1	DC_STAMP	155018409	155020562
Q5T1A1	-	HGNC26562	1	DCST2	DC_STAMP	154997057	155002676
O94760	-	HGNC2715	1	DDAH1	Amidinotransf	85787152	85930694
Q5TDH0	+	HGNC24578	1	DDI2	ubiquitin	15944193	15953262	Asp_protease	15964803	15978212
P39656	-	HGNC2728	1	DDOST	DDOST_48kD	20978874	20987755
Q16832	+	HGNC2731	1	DDR2	F5_F8_type_C	162722935	162725074	Pkinase_Tyr	162741996	162750015
Q9UHI6	+	HGNC2743	1	DDX20	DEAD	112298802	112303406	Helicase_C	112303665	112305529
Q5T1V6	-	HGNC25360	1	DDX59	zf-HIT	200635469	200635558	DEAD	200619684	200635189	Helicase_C	200613621	200619587
O75618	-	HGNC2755	1	DEDD	DED	161093934	161094176
O15121	+	HGNC13709	1	DEGS1	Lipid_DES	224371054	224377322	FA_desaturase	224377389	224380087
Q6P3S1	-	HGNC28404	1	DENND1B	uDENN	197641198	197684201	DENN	197576250	197641188	dDENN	197522176	197552367
Q68D51	-	HGNC24748	1	DENND2C	uDENN	115144748	115151335	DENN	115138467	115144187	dDENN	115130077	115130465
Q9H6A0	-	HGNC26192	1	DENND2D	uDENN	111740544	111742270	DENN	111731848	111739856	dDENN	111730286	111730881
O75064	-	HGNC29044	1	DENND4B	uDENN	153914565	153915034	DENN	153912917	153914462	dDENN	153911384	153912076
Q5TB30	-	HGNC22949	1	DEPDC1	DEP	68955287	68960347
Q9BSY9	+	HGNC24264	1	DESI2	Peptidase_C97	244816628	244868953
O00273	-	HGNC2772	1	DFFA	CIDE-N	10529246	10532463	DFF-C	10521750	10529233
O76075	+	HGNC2773	1	DFFB	CIDE-N	3774180	3775404	DFF40	3782360	3800185
Q15392	-	HGNC2859	1	DHCR24	FAD_binding_4	55340768	55352581
Q86SQ9	+	HGNC20603	1	DHDDS	Prenyltransf	26764689	26786635
O75911	-	HGNC17693	1	DHRS3	adh_short	12632880	12677238
Q08211	+	HGNC2750	1	DHX9	dsrm	182811711	182812524	dsrm	182823228	182827315	DEAD	182829158	182841567	Helicase_C	182845263	182847264	HA2	182848527	182850528	OB_NTP_bind	182850740	182852732
Q68CQ4	+	HGNC28440	1	DIEXF	UTP25	210010320	210024774
P49895	+	HGNC2883	1	DIO1	T4_deiodinase	54359905	54375666
O95661	-	HGNC687	1	DIRAS3	Ras	68512377	68512865
Q96F81	+	HGNC19711	1	DISP1	Patched	223164982	223177058	Patched	223177512	223178126
O95886	-	HGNC30368	1	DLGAP3	GKAP	35331686	35351110
Q9NPF5	+	HGNC18291	1	DMAP1	SANT_DAMP1_like	44680547	44684316	DMAP1	44684734	44685849
Q8NFW5	+	HGNC19026	1	DMBX1	Homeobox	46976192	46976642	OAR	46978083	46978136
Q96SC8	-	HGNC13908	1	DMRTA2	DM	50886872	50887012	DMA	50884915	50885025
Q96MA1	+	HGNC13913	1	DMRTB1	DM	53925145	53925285
Q0VDD8	+	HGNC2945	1	DNAH14	AAA_6	225273294	225284825	AAA_6	225284877	225305600	AAA_8	225393762	225440007	MT	225440041	225454441	AAA_9	225454430	225459694	AAA_9	225459683	225477652	Dynein_heavy	225492694	225511929	Dynein_heavy	225510511	225533770
Q9UDY4	+	HGNC14886	1	DNAJB4	DnaJ	78470804	78470989	DnaJ_C	78479001	78481874
O75061	+	HGNC15469	1	DNAJC6	PTEN_C2	65849885	65852594
O75937	-	HGNC15470	1	DNAJC8	DnaJ	28536518	28555443
Q9NVH1	-	HGNC25570	1	DNAJC11	DnaJ	6738492	6761820	DUF3395	6696183	6699986
Q9Y2G8	+	HGNC29157	1	DNAJC16	DnaJ	15855685	15863005	Thioredoxin	15863165	15871054
O14645	+	HGNC14353	1	DNALI1	Ax_dynein_light	38023252	38027795
Q8WZ79	+	HGNC28875	1	DNASE2B	DNase_II	84864338	84880545
Q9UQ16	+	HGNC29125	1	DNM3	Dynamin_N	171810896	172001573	Dynamin_M	172001598	172061976	PH	172100315	172277958	GED	172348206	172356431
Q5QJE6	-	HGNC24013	1	DNTTIP2	Fcf2	94335484	94337785
Q96N67	-	HGNC19190	1	DOCK7	DUF3398	63114127	63119775	DOCK-C2	63024882	63084389	DHR-2	62923234	62962164
Q9BQC3	+	HGNC3004	1	DPH2	Diphthamide_syn	44436280	44437699
Q9H2P9	-	HGNC24270	1	DPH5	TP_methylase	101456098	101490998
Q9P2X0	-	HGNC3007	1	DPM3	DPM3	155112533	155112805
Q07507	-	HGNC3011	1	DPT	DERM	168665804	168698294
Q12882	-	HGNC3012	1	DPYD	Fer4_20	98165082	98293739	Pyr_redox_2	98015142	98165024	DHO_dh	97658732	97981427	Fer4_21	97544597	97547956
Q01658	+	HGNC3017	1	DR1	CBFD_NFYB_HMF	93812233	93819469
Q6UX65	-	HGNC28769	1	DRAM2	Frag1	111660883	111674157
Q8NBI3	+	HGNC25054	1	DRAXIN	Draxin	11766424	11779750
Q6XUX3	-	HGNC29043	1	DSTYK	Pkinase_Tyr	205116757	205129389
Q9NZJ0	+	HGNC30288	1	DTL	WD40	212218085	212220677	WD40	212220687	212236272	WD40	212238363	212241584	WD40	212242036	212245555	WD40	212251527	212253998
Q9Y6W6	-	HGNC3065	1	DUSP10	Rhodanese	221879782	221912623	DSPc	221875819	221879634
Q9UNI6	+	HGNC3067	1	DUSP12	DSPc	161719691	161721701
Q9BVJ7	+	HGNC21480	1	DUSP23	DSPc	159750966	159752119
Q5VZP5	+	HGNC25034	1	DUSP27	DSPc	167086780	167095199
O14640	-	HGNC3084	1	DVL1	DIX	1277855	1284441	Dishevelled	1275654	1277836	PDZ	1275007	1275644	DEP	1273664	1273958	Dsh_C	1271554	1273648
O43781	+	HGNC3094	1	DYRK3	Pkinase	206821168	206822109
Q14209	-	HGNC3114	1	E2F2	E2F_TDP	23847559	23848518	E2F_CC-MB	23842959	23847513
Q99848	-	HGNC15531	1	EBNA1BP2	Ebp2	43630454	43638040
P42892	-	HGNC3146	1	ECE1	Peptidase_M13_N	21562387	21599320	Peptidase_M13	21546453	21554508
Q86YB7	-	HGNC23408	1	ECHDC2	ECH_1	53362194	53387236
Q16610	+	HGNC3153	1	ECM1	ECM1	150480686	150485940
Q8WWZ3	+	HGNC14341	1	EDARADD	Death	236645659	236645898
Q9BZQ6	-	HGNC16787	1	EDEM3	Glyco_hydro_47	184681608	184718709	PA	184672002	184677303
P20800	-	HGNC3177	1	EDN2	Endothelin	41949719	41949805
Q96C19	+	HGNC28670	1	EFHD2	EF-hand_7	15736738	15753660
P20827	+	HGNC3221	1	EFNA1	Ephrin	155100505	155106031
P52797	+	HGNC3223	1	EFNA3	Ephrin	155051505	155058408
P52798	+	HGNC3224	1	EFNA4	Ephrin	155036372	155039915
Q9GZT9	-	HGNC1232	1	EGLN1	zf-MYND	231557460	231557573	2OG-FeII_Oxy_3	231503357	231509844
Q9NR50	-	HGNC3259	1	EIF2B3	NTP_transferase	45407214	45446830
P41214	-	HGNC6583	1	EIF2D	SUI1	206765160	206769113
Q13347	+	HGNC3272	1	EIF3I	WD40	32689662	32690066	WD40	32696547	32696755
O43432	-	HGNC3298	1	EIF4G3	MIF4G	21188732	21212704	MA3	21155674	21175981	W2	21133832	21137308
P26378	+	HGNC3315	1	ELAVL4	RRM_1	50610653	50610865	RRM_1	50642802	50659580	RRM_1	50666536	50666748
P78545	+	HGNC3318	1	ELF3	SAM_PNT	201980406	201981482	Ets	201982971	201984400
P28324	-	HGNC3326	1	ELK4	Ets	205589918	205592994
Q9BW60	-	HGNC14418	1	ELOVL1	ELO	43829640	43831026
Q8N766	-	HGNC28957	1	EMC1	PQQ_2	19566817	19577942	DUF1620	19545802	19549906
Q8N8S7	-	HGNC18271	1	ENAH	WH1	225742632	225840391	VASP_tetra	225685488	225688719
P06733	-	HGNC3350	1	ENO1	Enolase_N	8927217	8934960	Enolase_C	8921427	8927195
O43768	-	HGNC3360	1	ENSA	Endosulfine	150598125	150601915
P11171	+	HGNC3377	1	EPB41	FERM_N	29320013	29342205	FERM_M	29342248	29356990	FERM_C	29359605	29365784	FA	29365797	29365928	SAB	29386988	29391631	4_1_CTD	29424391	29442294
P29317	-	HGNC3386	1	EPHA2	Ephrin_lbd	16475092	16482342	fn3	16464387	16464671	fn3	16461555	16464350	EphA2_TM	16460009	16461035	Pkinase_Tyr	16456776	16460002	SAM_1	16451742	16456049
P29322	+	HGNC3391	1	EPHA8	Ephrin_lbd	22890222	22903162	fn3	22915372	22915656	fn3	22915696	22920148	EphA2_TM	22921746	22923935	Pkinase_Tyr	22923942	22927528	SAM_1	22927857	22928192
Q5JZY3	-	HGNC19987	1	EPHA10	Ephrin_lbd	38227293	38230632	fn3	38218596	38218889	fn3	38197134	38201047	EphA2_TM	38188746	38192849	Pkinase_Tyr	38185141	38188739	SAM_1	38184085	38184450
P29323	+	HGNC3393	1	EPHB2	Ephrin_lbd	23037536	23111349	GCC2_GCC3	23111539	23189630	fn3	23191378	23191665	fn3	23191705	23219508	EphA2_TM	23222003	23232568	Pkinase_Tyr	23232575	23237012	SAM_1	23238971	23240027
P07099	+	HGNC3401	1	EPHX1	Abhydrolase_1	226026414	226032895
Q8IUS5	+	HGNC23758	1	EPHX4	Abhydrolase_1	92498110	92515938
P07814	-	HGNC3418	1	EPRS	GST_C_3	220205788	220208275	tRNA-synt_1c	220184386	220203761	tRNA-synt_1c_C	220178609	220184382	WHEP-TRS	220170450	220170608	WHEP-TRS	220162072	220170389	WHEP-TRS	220160653	220161996	tRNA-synt_2b	220152807	220156164	HGTP_anticodon	220146611	220152761	ProRS-C_1	220142150	220145445
Q8TE67	-	HGNC21297	1	EPS8L3	PTB	110301281	110304130	SH3_1	110294338	110294687
O43414	-	HGNC17276	1	ERI3	RNase_T	44687283	44804766
Q5RHP9	-	HGNC25346	1	ERICH3	DUF4590	75072537	75086522
Q96PL5	+	HGNC15743	1	ERMAP	V-set	43296465	43296785	PRY	43308193	43308339	SPRY	43308349	43308678
Q86YB8	-	HGNC14355	1	ERO1LB	ERO1	236381851	236433230
Q9UJM3	-	HGNC18185	1	ERRFI1	GTPase_binding	8074454	8075669	Inhibitor_Mig-6	8073545	8073715
B1AK53	+	HGNC13281	1	ESPN	Ank_2	6485133	6488396	Ank_2	6488367	6500434	Ank_2	6488415	6500721	Ank_4	6500411	6500790	Ank_2	6500689	6501041	WH2	6511689	6511772
P62508	-	HGNC3474	1	ESRRG	zf-C4	216824318	216850513	Hormone_recep	216680340	216737665
Q9NVF9	-	HGNC25575	1	ETNK2	Choline_kinase	204106324	204119035
P41162	-	HGNC3492	1	ETV3	Ets	157103955	157105440
Q6ZN32	-	HGNC33834	1	ETV3L	Ets	157068623	157069110
Q9NVM1	-	HGNC25558	1	EVA1B	FAM176	36787934	36788619
O60447	-	HGNC3501	1	EVI5	RabGAP-TBC	93159882	93169151
Q9UQ84	+	HGNC3511	1	EXO1	XPG_N	242013728	242016675	XPG_I	242020653	242021939
Q9H790	+	HGNC26115	1	EXO5	Exo5	40980427	40980804	Exo5	40980775	40981281
Q8IYI6	-	HGNC24659	1	EXOC8	Vps51	231473179	231473442	Exo84_C	231471871	231472488
Q01780	-	HGNC9138	1	EXOSC10	PMC2NT	11151627	11158194	DNA_pol_A_exo1	11141207	11147939	HRDC	11139797	11140890
Q92935	+	HGNC3515	1	EXTL1	Exostosin	26349405	26356990	Glyco_transf_64	26357971	26361784
Q9UBQ6	-	HGNC3516	1	EXTL2	Glyco_transf_64	101339527	101343268
Q99504	-	HGNC3521	1	EYA3	Hydrolase	28301051	28337459
P13726	-	HGNC3541	1	F3	Tissue_fac	95001578	95007143	Interfer-bind	94997892	95001520
P12259	-	HGNC3542	1	F5	Cu-oxidase_3	169528529	169551725	Cu-oxidase_3	169499005	169505793	F5_F8_type_C	169489776	169494098	F5_F8_type_C	169483571	169487753
Q9Y624	-	HGNC14685	1	F11R	ig	160970436	160971110	Ig_3	160969711	160970126
P05160	-	HGNC3534	1	F13B	Sushi	197031990	197032178	Sushi	197030926	197031093	Sushi	197030032	197030199	Sushi	197029499	197029663	Sushi	197026419	197026580	Sushi	197026146	197026307	Sushi	197024848	197025012	Sushi	197019830	197019994
O00519	+	HGNC3553	1	FAAH	Amidase	46867850	46879193
P05413	-	HGNC3557	1	FABP3	Lipocalin	31838738	31845845
Q9UNN5	-	HGNC3578	1	FAF1	UBA_4	51267334	51425461	UBX	50907120	50941302
O60667	-	HGNC14315	1	FAIM3	V-set	207087107	207087415
Q7Z5A8	+	HGNC21590	1	FAM19A3	TAFA	113265649	113266694
O75063	+	HGNC23017	1	FAM20B	Fam20C	179023761	179041246
Q6ZT52	+	HGNC31791	1	FAM43B	PID_2	20879677	20880264
Q96A09	-	HGNC28273	1	FAM46B	NTP_transf_7	27332596	27339007
Q5VWP2	+	HGNC24712	1	FAM46C	NTP_transf_7	118165539	118166498
Q8N5J2	-	HGNC25648	1	FAM63A	DUF544	150973013	150974810
Q5T7M9	-	HGNC32213	1	FAM69A	PIP49_N	93309698	93341986	PIP49_C	93309038	93309646
Q8IYT1	+	HGNC26541	1	FAM71A	DUF3699	212798553	212798774
Q5TYM5	+	HGNC24044	1	FAM72A	FAM72	206139317	206154048
Q86X60	+	HGNC24805	1	FAM72B	FAM72	120839846	120854583
H0Y354	-	HGNC30602	1	FAM72C	FAM72	143897549	143912282
Q6L9T8	-	HGNC33593	1	FAM72D	FAM72	143897549	143912282
Q8NAN2	+	HGNC24741	1	FAM73A	DUF2217	78249016	78340656
Q8TAV0	+	HGNC28530	1	FAM76A	FAM76	28052601	28086090
Q5T8I3	+	HGNC27637	1	FAM102B	NT-C2	109103057	109159045
Q8TAY7	+	HGNC25860	1	FAM110D	FAM110_N	26487795	26488085	FAM110_C	26488203	26488568
Q96AQ9	-	HGNC26717	1	FAM131C	FAM131	16385078	16388677
Q8WW52	-	HGNC25032	1	FAM151A	DUF2181	55077300	55085602	DUF2181	55074973	55076156
Q96GL9	+	HGNC28274	1	FAM163A	FAM163	179782233	179783321
Q9BTA0	+	HGNC28133	1	FAM167B	DUF3259	32713978	32714199
A6PVY3	+	HGNC34395	1	FAM177B	FAM177	222919903	222923289
A6NL82	+	HGNC34347	1	FAM183A	FAM183	43613674	43621942
P81408	-	HGNC1233	1	FAM189B	CD20	155223448	155224562
Q9NTI7	-	HGNC28045	1	FAM212B	FAM212	112269958	112270137
Q8TBF2	+	HGNC28390	1	FAM213B	AhpC-TSA_2	2518533	2520012
H3BQW9	-	HGNC44652	1	FAM229A	UPF0731	32827036	32827445
A6NEA5	+	HGNC49427	1	FAM231A	DUF4741	55099865	55101117
A6NCW3	+	HGNC49506	1	FAM231B	DUF4741	55108398	55111485
A6NEA5	-	HGNC49508	1	FAM231C	DUF4741	13671938	13682075
Q6ZW35	+	HGNC49509	1	FAM231D	DUF4741	149676070	149676576
P48023	+	HGNC11936	1	FASLG	TNF	172634788	172635153
Q8WUP2	+	HGNC24686	1	FBLIM1	LIM	16096909	16101121	LIM	16101128	16103671	LIM	16103681	16111138
Q9UK22	-	HGNC13581	1	FBXO2	F-box	11710634	11710777	FBA	11708759	11710573
Q9NRD1	+	HGNC13585	1	FBXO6	F-box-like	11728752	11728895	FBA	11728950	11733797
Q9NVF7	+	HGNC29046	1	FBXO28	F-box	224302018	224318188
Q6P3S6	-	HGNC29249	1	FBXO42	F-box-like	16632391	16641774	Kelch_3	16583210	16621391	Kelch_2	16580162	16582281
Q9H4M3	+	HGNC24847	1	FBXO44	F-box-like	11715908	11716051	FBA	11716106	11721312
Q8WWV6	-	HGNC24692	1	FCAMR	V-set	207135696	207139179
P12319	+	HGNC3609	1	FCER1A	Ig_2	159273726	159273965	Ig_2	159275780	159276028
P30273	+	HGNC3611	1	FCER1G	TCR_zetazeta	161187787	161188042	ITAM	161188499	161188715
P12314	+	HGNC3613	1	FCGR1A	Ig_2	149755567	149755806	Ig_2	149759924	149760169	ig	149761633	149761875
Q92637	-	HGNC3614	1	FCGR1B	Ig_2	120934387	120934626	Ig_2	120930039	120930290
P12318	+	HGNC3616	1	FCGR2A	Ig_2	161476135	161476374	Ig_2	161479612	161479860
P31994	+	HGNC3618	1	FCGR2B	Ig_2	161641193	161641432	Ig_2	161642767	161643015
P31995	+	HGNC15626	1	FCGR2C	Ig_2	161559363	161559602	Ig_2	161560936	161561184
P08637	-	HGNC3619	1	FCGR3A	Ig_2	161518325	161519555	Ig_2	161514605	161518315
O75015	-	HGNC3620	1	FCGR3B	Ig_2	161599682	161600913	Ig_2	161596049	161599672
O75636	-	HGNC3625	1	FCN3	Fibrinogen_C	27695729	27699978
Q96LA6	-	HGNC18509	1	FCRL1	Ig_2	157773635	157776891	Ig_2	157772170	157772433	Ig_3	157771750	157771971
Q96LA5	-	HGNC14875	1	FCRL2	Ig_2	157740202	157740453	Ig_3	157739707	157739928	Ig_2	157738207	157738470	Ig_2	157737024	157737287
Q96P31	-	HGNC18506	1	FCRL3	Ig_2	157667452	157667706	Ig_2	157666933	157667202	Ig_2	157665833	157666096	Ig_2	157660321	157665385	Ig_3	157660090	157660311
Q96PJ5	-	HGNC18507	1	FCRL4	Ig_3	157559036	157559236	Ig_2	157557658	157557906	Ig_3	157557117	157557338	ig	157555976	157556212
Q96RD9	-	HGNC18508	1	FCRL5	Ig_2	157516742	157516975	Ig_2	157514624	157514869	Ig_3	157514103	157514324	Ig_2	157512652	157512915	Ig_2	157508879	157509142	Ig_2	157504407	157504670	Ig_3	157497452	157497673	Ig_3	157494114	157494335	Ig_2	157490810	157491070
Q6DN72	+	HGNC31910	1	FCRL6	Ig_2	159777970	159778230	Ig_2	159778762	159779031	Ig_3	159779203	159779427
Q7L513	+	HGNC18504	1	FCRLA	Ig_2	161680636	161681191	Ig_3	161681207	161681887
Q6BAA4	+	HGNC26431	1	FCRLB	Ig_2	161695613	161695873
P14324	+	HGNC3631	1	FDPS	polyprenyl_synt	155279994	155290277
Q96C11	+	HGNC25610	1	FGGY	FGGY_N	59787252	60019797	FGGY_C	60019861	60139784
P09769	-	HGNC3697	1	FGR	SH3_1	27948107	27949634	SH2	27943371	27943805	Pkinase_Tyr	27939478	27942250
P07954	-	HGNC3700	1	FH	Lyase_1	241665811	241680576	FumaraseC_C	241661136	241663763
B1AJZ9	+	HGNC29408	1	FHAD1	FHA	15578332	15598980
Q13643	-	HGNC3704	1	FHL3	LIM	38464685	38464966	LIM	38463661	38464675	LIM	38463392	38463651	LIM	38463082	38463382
Q8NFF5	+	HGNC24671	1	FLAD1	MoCF_biosynth	154956510	154961036	PAPS_reduct	154962110	154962890	PAPS_reduct	154962837	154965414
P20930	-	HGNC3748	1	FLG	S_100	152287794	152287922	Filaggrin	152286443	152286586	Filaggrin	152286077	152286238	Filaggrin	152285471	152285623	Filaggrin	152285102	152285266	Filaggrin	152284496	152284648	Filaggrin	152284130	152284291	Filaggrin	152283524	152283676	Filaggrin	152283158	152283319	Filaggrin	152282552	152282704	Filaggrin	152282186	152282347	Filaggrin	152281580	152281732	Filaggrin	152281211	152281375	Filaggrin	152280605	152280757	Filaggrin	152280239	152280400
Q5D862	-	HGNC33276	1	FLG2	S_100	152331222	152331350
Q9Y5Y0	+	HGNC24682	1	FLVCR1	MFS_1	213032116	213062508
Q9NZ56	+	HGNC14074	1	FMN2	Drf_FH1	240370897	240371187	Drf_FH1	240371143	240371424	Drf_FH1	240371392	240371664	FH2	240371959	240601469
Q01740	+	HGNC3769	1	FMO1	FMO-like	171227218	171254668
Q99518	+	HGNC3770	1	FMO2	FMO-like	171154856	171178089
P31513	+	HGNC3771	1	FMO3	FMO-like	171061803	171086579
P31512	+	HGNC3772	1	FMO4	FMO-like	171288968	171310897
P49326	-	HGNC3773	1	FMO5	FMO-like	146658481	146696614
Q06828	-	HGNC3774	1	FMOD	LRRNT	203317086	203317175	LRR_8	203316894	203317085	LRR_8	203316693	203316872	LRR_8	203316483	203316668
Q5T0N5	+	HGNC20851	1	FNBP1L	FCH	93965028	93988970	SH3_1	94014962	94016625
Q8NAU1	-	HGNC20240	1	FNDC5	fn3	33333848	33334589	DUF4808	33330276	33333407
O60548	+	HGNC3803	1	FOXD2	Forkhead	47904186	47904455
Q9UJU5	+	HGNC3804	1	FOXD3	Forkhead	63789150	63789419
Q13461	+	HGNC3808	1	FOXE3	Forkhead	47882198	47882467
Q9UPW0	-	HGNC29178	1	FOXJ3	Forkhead	42693586	42744155
A8MYZ6	+	HGNC24814	1	FOXO6	Forkhead	41827867	41847407	FOXO-TAD	41848161	41848286
O14772	+	HGNC3825	1	FPGT	Fucokinase	74667052	74671291
Q6ZNA5	-	HGNC27622	1	FRRS1	Reeler	100206459	100214230	DOMON	100194061	100203760	Cytochrom_B561	100176473	100185095
Q96AE4	-	HGNC4004	1	FUBP1	KH_1	78430896	78432771	KH_1	78430414	78430829	KH_1	78429770	78430338	KH_1	78428469	78429309	DUF1897	78414968	78421005	DUF1897	78414887	78414961
P04066	-	HGNC4006	1	FUCA1	Alpha_L_fucos	24175197	24194706	Fucosidase_C	24172216	24175166
Q8TAK5	+	HGNC28441	1	GABPB2	Ank_2	151060693	151065694	Ank_2	151062897	151065793
O14764	+	HGNC4084	1	GABRD	Neur_chan_LBD	1956439	1960599	Neur_chan_memb	1960618	1961586
P24522	+	HGNC4095	1	GADD45A	Ribosomal_L7Ae	68151724	68152255
Q14376	-	HGNC4116	1	GALE	GDP_Man_Dehyd	24122486	24125481
Q10471	+	HGNC4124	1	GALNT2	Glycos_transf_2	230371800	230386263	Ricin_B_lectin	230401009	230415177
Q8WXI9	-	HGNC30778	1	GATAD2B	P66_CC	153790644	153791394	GATA	153785782	153785886
P04062	-	HGNC4177	1	GBA	Glyco_hydro_30	155204797	155209865
P32455	-	HGNC4182	1	GBP1	GBP	89523702	89528865	GBP_C	89519076	89523698
P32456	-	HGNC4183	1	GBP2	GBP	89582702	89587597	GBP_C	89573899	89582698
Q9H0R5	-	HGNC4184	1	GBP3	GBP	89478895	89486352	GBP_C	89473460	89478891
Q96PP9	-	HGNC20480	1	GBP4	GBP	89656971	89662930	GBP_C	89651077	89656967
Q96PP8	-	HGNC19895	1	GBP5	GBP	89732056	89735186	GBP_C	89726425	89732052
Q6ZN66	+	HGNC25395	1	GBP6	GBP	89834162	89846162	GBP_C	89846166	89850863
Q8N8V2	-	HGNC29606	1	GBP7	GBP	89616040	89637566	GBP_C	89598011	89616036
P48507	-	HGNC4312	1	GCLM	Aldo_ket_red	94354653	94367209
Q5JQS6	+	HGNC29583	1	GCSAML	HGAL	247729235	247737678
Q9NXN4	-	HGNC18010	1	GDAP2	Macro	118454619	118461320	CRAL_TRIO_2	118420630	118429260
Q99684	-	HGNC4237	1	GFI1	zf-met	92945913	92945978	zf-C2H2	92944232	92944300	zf-C2H2	92941684	92941752	zf-C2H2_6	92941594	92941671
O95749	+	HGNC4249	1	GGPS1	polyprenyl_synt	235498619	235505952
Q8TF65	+	HGNC18177	1	GIPC2	PDZ	78546467	78560794
P35212	+	HGNC4278	1	GJA4	Connexin	35259821	35260513
P36382	-	HGNC4279	1	GJA5	Connexin	147230653	147231339	Connexin40_C	147230272	147230577
P48165	+	HGNC4281	1	GJA8	Connexin	147380089	147380769	Connexin50	147380860	147381060
P57773	-	HGNC19155	1	GJA9	Connexin	39341065	39341763
O75712	+	HGNC4285	1	GJB3	Connexin	35250367	35250996
Q9NTQ9	+	HGNC4286	1	GJB4	Connexin	35226859	35227485
O95377	+	HGNC4287	1	GJB5	Connexin	35222935	35223561
Q5T442	+	HGNC17494	1	GJC2	Connexin	228345472	228346332
Q92990	-	HGNC14373	1	GLMN	Kinetochor_Ybp2	92712188	92763555
Q8WWB7	-	HGNC29436	1	GLMP	NCU-G1	156262858	156264764
Q9NS18	-	HGNC16065	1	GLRX2	Glutaredoxin	193065856	193066868
P15104	-	HGNC4341	1	GLUL	Gln-synt_N	182356281	182357802	Gln-synt_C	182353800	182356265
Q9Y692	+	HGNC4370	1	GMEB1	SAND	29018120	29023463
P08754	+	HGNC4387	1	GNAI3	G-alpha	110091352	110134819
P19087	-	HGNC4394	1	GNAT2	G-alpha	110146011	110155485
P62873	-	HGNC4396	1	GNB1	WD40	1737931	1747264	WD40	1735912	1737924	WD40	1721896	1722012	WD40	1720645	1721886	WD40	1720513	1720635	WD40	1718772	1720500
P50150	-	HGNC4407	1	GNG4	G-gamma	235715411	235747113
P63218	-	HGNC4408	1	GNG5	G-gamma	84967530	84971764
Q9UBI6	-	HGNC19663	1	GNG12	G-gamma	68171136	68173350
Q13823	-	HGNC29925	1	GNL2	NGP1NT	38052958	38059384	MMR_HSR1	38040286	38042132
O15228	+	HGNC4416	1	GNPAT	Acyltransferase	231396403	231401836
Q9H4A5	-	HGNC24882	1	GOLPH3L	GPP34	150620829	150667172
Q6ZVE7	-	HGNC24766	1	GOLT1A	Got1	204168343	204172091
Q3T8J9	-	HGNC25973	1	GON4L	PAH	155730264	155730404
Q5T7V8	+	HGNC25676	1	GORAB	Transcrip_act	170508677	170521321
Q99795	-	HGNC4445	1	GPA33	V-set	167038159	167042746	Ig_2	167024973	167038170
Q9NW75	-	HGNC25499	1	GPATCH2	G-patch	217604540	217604674
Q96I76	-	HGNC25720	1	GPATCH3	G-patch	27217710	27219165
Q5T3I0	-	HGNC25982	1	GPATCH4	G-patch	156568099	156568807
Q9HC44	-	HGNC28843	1	GPBP1L1	Vasculin	46093939	46096190
Q9H9Y4	-	HGNC25513	1	GPN2	ATP_bind_1	27210727	27216547
P46089	+	HGNC4484	1	GPR3	7tm_1	27720471	27721193
O00155	+	HGNC4480	1	GPR25	7tm_1	200842331	200843086
O60883	+	HGNC14923	1	GPR37L1	7tm_1	202092530	202097486
Q9Y2T5	+	HGNC4508	1	GPR52	7tm_1	174417418	174418200
Q9BZJ8	+	HGNC13300	1	GPR61	7tm_1	110085819	110086667
Q9GZN0	+	HGNC4539	1	GPR88	7tm_1	101004664	101005530
B7ZAQ6	-	HGNC31984	1	GPR89A	GPHR_N	145791166	145804362	ABA_GPCR	145765048	145787854
P0CG08	+	HGNC13840	1	GPR89B	GPHR_N	147425579	147438789	ABA_GPCR	147442108	147465119
Q6NV75	-	HGNC23618	1	GPR153	7tm_1	6311488	6314895
Q5UAW9	-	HGNC23687	1	GPR157	7tm_2	9164663	9189049
Q8N6U8	-	HGNC23694	1	GPR161	7tm_1	168065923	168074009
P81274	+	HGNC29501	1	GPSM2	TPR_12	109439598	109440237	TPR_12	109440127	109440640	TPR_12	109441310	109444436	TPR_12	109441528	109444556	TPR_12	109444443	109445856	GoLoco	109465066	109465128	GoLoco	109466654	109466719	GoLoco	109466804	109472355	GoLoco	109472392	109472457
Q96SL4	+	HGNC4559	1	GPX7	GSHPx	53068154	53072616
Q9H772	-	HGNC17655	1	GREM2	DAN	240656295	240656627
Q8TE85	+	HGNC25839	1	GRHL3	CP2	24663586	24669240
Q13003	-	HGNC4581	1	GRIK3	ANF_receptor	37319233	37356649	Lig_chan-Glu_bd	37291313	37315937	Lig_chan	37270656	37291273
P27469	+	HGNC30229	1	G0S2	G0-G1_switch_2	209849030	209849338
P09488	+	HGNC4632	1	GSTM1	GST_N	110230502	110231738	GST_C	110231897	110235836
P28161	+	HGNC4634	1	GSTM2	GST_N	110210744	110211980	GST_C	110212143	110251111
P21266	-	HGNC4635	1	GSTM3	GST_N	110280919	110282890	GST_C	110279782	110280762
Q03013	+	HGNC4636	1	GSTM4	GST_N	110199018	110200280	GST_C	110200444	110203795
P46439	+	HGNC4637	1	GSTM5	GST_N	110254941	110256174	GST_C	110256333	110259967
Q00403	-	HGNC4648	1	GTF2B	TF_Zn_Ribbon	89329756	89353030	TFIIB	89323132	89325866	TFIIB	89318991	89323062
Q02747	-	HGNC4682	1	GUCA2A	Guanylin	42628579	42630322
Q16661	+	HGNC4683	1	GUCA2B	Guanylin	42619197	42621261
Q16774	+	HGNC4693	1	GUK1	Guanylate_kin	228328010	228336391
P84243	+	HGNC4764	1	H3F3A	Histone	226252053	226259165
O95479	+	HGNC4795	1	H6PD	G6PD_N	9305045	9305599	G6PD_C	9305603	9324070	Glucosamine_iso	9324191	9324865
Q9NYQ3	+	HGNC4810	1	HAO2	FMN_dh	119923745	119936451
Q9GZV7	+	HGNC17410	1	HAPLN2	V-set	156593637	156593948	Xlink	156594145	156594559	Xlink	156594898	156595164
Q9P1Z3	+	HGNC19183	1	HCN3	Ion_trans_N	155247526	155247657	Ion_trans	155247658	155254533	cNMP_binding	155255614	155257073
O43613	+	HGNC4848	1	HCRTR1	7tm_1	32084980	32090706
Q13547	+	HGNC4852	1	HDAC1	Hist_deacetyl	32768224	32796490
P51858	-	HGNC4856	1	HDGF	PWWP	156714826	156721193
Q9H583	-	HGNC25517	1	HEATR1	U3snoRNP10	236758867	236760167	BP28CT	236717945	236719178
Q5T447	-	HGNC26117	1	HECTD3	ANAPC10	45474266	45475722	HECT	45469193	45472431
Q5T8I9	-	HGNC26400	1	HENMT1	Methyltransf_23	109192967	109200137
Q9Y543	-	HGNC16005	1	HES2	HLH	6479328	6479840	Hairy_orange	6479082	6479201
Q5TGS1	+	HGNC26226	1	HES3	HLH	6304426	6304676
Q9HCC6	-	HGNC24149	1	HES4	HLH	935077	935250	Hairy_orange	934738	934950
Q5TA89	-	HGNC19764	1	HES5	HLH	2461285	2461554	Hairy_orange	2461042	2461149
Q9NQ87	-	HGNC4882	1	HEYL	HLH	40095914	40098337	Hairy_orange	40092691	40092819
Q6ZVN8	+	HGNC4887	1	HFE2	RGM_N	145415290	145416333	RGM_C	145416343	145416837
A2PYH4	-	HGNC20193	1	HFM1	DEAD	91841278	91846497	Helicase_C	91818062	91841139	Sec63	91779023	91808992
Q5VTY9	+	HGNC18270	1	HHAT	MBOAT	210573911	210796950
Q6UWX4	-	HGNC25842	1	HHIPL2	Folate_rec	222717234	222721256	GSDH	222705374	222717206
Q96MC6	+	HGNC23363	1	HIAT1	MFS_1	100515498	100546113
Q86Z02	+	HGNC19006	1	HIPK1	Pkinase	114483573	114499395
Q6FI13	-	HGNC4736	1	HIST2H2AA3	Histone	149813992	149814261	Histone_H2A_C	149813887	149813991
Q6FI13	+	HGNC29668	1	HIST2H2AA4	Histone	149822684	149822953	Histone_H2A_C	149822954	149823058
Q8IUE6	-	HGNC20508	1	HIST2H2AB	Histone	149859193	149859462	Histone_H2A_C	149859088	149859192
Q16777	+	HGNC4738	1	HIST2H2AC	Histone	149858528	149858797	Histone_H2A_C	149858798	149858902
Q16778	-	HGNC4760	1	HIST2H2BE	Histone	149857884	149858186
Q5QNW6	-	HGNC24700	1	HIST2H2BF	Histone	149783572	149783871
Q71DI3	+	HGNC20505	1	HIST2H3A	Histone	149824217	149824612
Q71DI3	-	HGNC20503	1	HIST2H3C	Histone	149812333	149812728
Q71DI3	-	HGNC25311	1	HIST2H3D	Histone	149784840	149785235
P62805	+	HGNC4794	1	HIST2H4A	CENP-T_C	149804300	149804545
P62805	-	HGNC29607	1	HIST2H4B	CENP-T_C	149832400	149832645
Q7L7L0	-	HGNC20507	1	HIST3H2A	Histone	228645245	228645514	Histone_H2A_C	228645140	228645244
Q8N257	+	HGNC20514	1	HIST3H2BB	Histone	228645837	228646136
Q16695	-	HGNC4778	1	HIST3H3	Histone	228612630	228613025
Q14774	+	HGNC4978	1	HLX	Homeobox	221055562	221057578
Q96RW7	+	HGNC19194	1	HMCN1	VWA_2	185704032	185878486	I-set	185902686	185902952	I-set	185931655	185933020	I-set	185934939	185939621	I-set	185946924	185950195	I-set	185951399	185953441	I-set	185956569	185958775	I-set	185959442	185962437	I-set	185963952	185964215	I-set	185966596	185969367	I-set	185970438	185970869	I-set	185972867	185976410	I-set	185984311	185984565	I-set	185985113	185985367	I-set	185986121	185987480
Q8WW32	+	HGNC24954	1	HMGB4	HMG_box_2	34329808	34330029	HMG_box	34330069	34330275
P35914	-	HGNC5005	1	HMGCL	HMGL-like	24129012	24147049
P54868	-	HGNC5008	1	HMGCS2	HMG_CoA_synt_N	120302502	120307205	HMG_CoA_synt_C	120293433	120302501
P05204	+	HGNC4986	1	HMGN2	HMG14_17	26799107	26801633
O60812	-	HGNC29295	1	HNRNPCL1	RRM_1	12907899	12908090
B2RXH8	-	HGNC48813	1	HNRNPCL2	RRM_1	13183632	13183820
B7ZW38	-	HGNC51235	1	HNRNPCL3	RRM_1	12907899	12908090
O43390	-	HGNC5047	1	HNRNPR	RRM_1	23648126	23650224	RRM_1	23645056	23648089	RRM_1	23637776	23640194
Q00839	-	HGNC5048	1	HNRNPU	SAP	245027483	245027587	SPRY	245021420	245023653	AAA_33	245019443	245021018
Q9UJC3	+	HGNC19884	1	HOOK1	HOOK	60280829	60338610
Q86X24	-	HGNC25245	1	HORMAD1	HORMA	150679172	150689724
Q5SSJ5	-	HGNC24973	1	HP1BP3	Linker_histone	21094121	21099981	Linker_histone	21076369	21091987	Linker_histone	21074053	21076335
P84074	+	HGNC5144	1	HPCA	EF-hand_1	33354689	33354775	EF-hand_7	33354800	33359400	EF-hand_8	33354833	33359406
Q9UM19	-	HGNC18212	1	HPCAL4	EF-hand_7	40149611	40149793	EF-hand_7	40148258	40149685
Q86YZ3	-	HGNC20846	1	HRNR	S_100	152195591	152195719
Q7LGA3	+	HGNC5193	1	HS2ST1	Sulfotransfer_2	87538688	87570289
P14060	+	HGNC5217	1	HSD3B1	3Beta_HSD	120050118	120057010
P26439	+	HGNC5218	1	HSD3B2	3Beta_HSD	119958058	119964985
P28845	+	HGNC5208	1	HSD11B1	adh_short	209879170	209907680
P56937	+	HGNC5215	1	HSD17B7	adh_short	162760597	162773283
P17066	+	HGNC5239	1	HSPA6	HSP70	161494470	161496290
Q9UBY9	-	HGNC5249	1	HSPB7	HSP20	16342080	16343681
Q9Y547	-	HGNC25019	1	HSPB11	F5_F8_type_C	54387362	54405712
P98160	-	HGNC5273	1	HSPG2	Ldl_recept_a	22214431	22214544	Ldl_recept_a	22213913	22214023	Ldl_recept_a	22213708	22213818	Ldl_recept_a	22211813	22211926	I-set	22211299	22211644	Laminin_B	22206863	22207866	Laminin_EGF	22205524	22206652	Laminin_EGF	22204935	22205517	Laminin_EGF	22203067	22204943	Laminin_B	22201425	22202756	Laminin_EGF	22201168	22201451	Laminin_EGF	22200936	22201161	Laminin_EGF	22199868	22200929	Laminin_EGF	22199175	22199554	Laminin_B	22191377	22198713
P28221	-	HGNC5289	1	HTR1D	7tm_1	23519644	23520549
P50406	+	HGNC5301	1	HTR6	7tm_1	19992373	20005498
Q5T013	-	HGNC26948	1	HYI	AP_endonuc_2	43917147	43919394
Q9NSE4	+	HGNC29685	1	IARS2	tRNA-synt_1	220267817	220311346	Anticodon_1	220312440	220318871	zf-FPG_IleRS	220320888	220320962
Q5T440	+	HGNC27302	1	IBA57	GCV_T_C	228362915	228363193
O60725	-	HGNC5350	1	ICMT	ICMT	6285223	6292146
Q02535	-	HGNC5362	1	ID3	HLH	23885674	23885799
Q5VY09	+	HGNC5393	1	IER5	IER	181058039	181058725	IER	181058720	181059019
Q5TF58	-	HGNC27006	1	IFFO2	Filament	19235159	19238494
P09912	-	HGNC4054	1	IFI6	Ifi-6-16	27992951	27995019
Q16666	+	HGNC5395	1	IFI16	PYRIN	158984492	158984719	HIN	158988070	158990265	HIN	159021523	159023457
Q8TCB0	+	HGNC16938	1	IFI44	TLD	79115956	79116336
Q8IU57	-	HGNC18584	1	IFNLR1	Tissue_fac	24495940	24513716
Q86VF2	+	HGNC24607	1	IGFN1	I-set	201163359	201166438	I-set	201175387	201175644	I-set	201175663	201175941	fn3	201175954	201176211	fn3	201176254	201176511	fn3	201176557	201176814	I-set	201176866	201177132	fn3	201177145	201177399	I-set	201177490	201177759
O75054	-	HGNC5950	1	IGSF3	V-set	117156795	117159049	V-set	117156423	117156770	Ig_3	117150648	117150941	Ig_3	117142704	117146290	V-set	117131406	117142601	V-set	117127336	117131354
Q969P0	-	HGNC17813	1	IGSF8	V-set	160063956	160065003
Q9P2J2	-	HGNC18132	1	IGSF9	I-set	159906192	159906692	Ig_3	159904260	159904609	Ig_3	159902349	159904113	I-set	159901246	159901711	fn3	159900506	159901039	fn3	159899705	159900169
Q96ID5	+	HGNC28246	1	IGSF21	V-set	18554412	18661482
Q14164	+	HGNC14552	1	IKBKE	Pkinase	206646595	206651590
P08887	+	HGNC6019	1	IL6R	ig	154401674	154401889	IL6Ra-bind	154402961	154407175
P22301	-	HGNC5962	1	IL10	IL10	206941995	206945767
Q99665	+	HGNC5972	1	IL12RB2	Lep_receptor_Ig	67787290	67787538	IL6Ra-bind	67792429	67795271	fn3	67833513	67838192
Q9UHD0	+	HGNC5990	1	IL19	IL10	206972246	207014390
Q9NYY1	+	HGNC6002	1	IL20	IL10	207039255	207041903
Q8N6P7	-	HGNC13700	1	IL22RA1	Tissue_fac	24463654	24469568	Interfer-bind	24454658	24463620
Q71H61	-	HGNC18131	1	ILDR2	LSR	166905831	166908750
Q12905	-	HGNC6037	1	ILF2	DZF	153635030	153640114
Q8NI35	+	HGNC28881	1	INADL	L27_2	62228586	62231956	PDZ	62234970	62237232	PDZ	62240899	62253551	PDZ	62257044	62263048	PDZ	62299401	62321899	PDZ	62366955	62374133	PDZ	62455884	62483617	PDZ	62550246	62579814	PDZ	62579863	62582836	PDZ	62588713	62613961
P32019	-	HGNC6077	1	INPP5B	INPP5B_PH	38397666	38411979	Exo_endo_phos	38343889	38354005	RhoGAP	38328052	38334225
Q9Y5Q6	-	HGNC6088	1	INSL5	Insulin	67263698	67266828
P14616	-	HGNC6093	1	INSRR	Recep_L_domain	156823703	156824041	Furin-like	156821534	156823663	Recep_L_domain	156819101	156821485	Pkinase_Tyr	156810820	156812986
Q68E01	+	HGNC26153	1	INTS3	DUF2356	153724836	153734121
Q96P70	+	HGNC19425	1	IPO9	IBN_N	201798464	201817565
O94829	+	HGNC16853	1	IPO13	IBN_N	44415137	44415337	Xpo1	44415350	44415793
Q9Y573	-	HGNC6108	1	IPP	BTB	46206894	46212004	BACK	46206573	46206881	Kelch_1	46193360	46195306	Kelch_1	46184929	46193356	Kelch_1	46182603	46184925	Kelch_1	46180031	46182599	Kelch_1	46165832	46180027	Kelch_1	46165673	46165828
Q86VI3	-	HGNC20669	1	IQGAP3	CH	156534408	156539192	IQ	156517915	156517971	IQ	156514225	156517887	IQ	156513970	156514197	IQ	156513779	156513841	RasGAP	156504369	156509196	RasGAP_C	156498311	156500003
Q7Z5L9	-	HGNC21729	1	IRF2BP2	IRF-2BP1_2	234745051	234745206
O14896	-	HGNC6121	1	IRF6	IRF	209969729	209974733	IRF-3	209961947	209965613
P05161	+	HGNC4053	1	ISG15	ubiquitin	949382	949591	ubiquitin	949619	949825
Q9H9L3	-	HGNC25745	1	ISG20L2	RNase_T	156693197	156696906
O75578	+	HGNC6135	1	ITGA10	VWA	145530284	145532594	FG-GAP	145533810	145533929	FG-GAP	145534140	145534247	Integrin_alpha2	145535736	145539745
Q13352	-	HGNC6157	1	ITGB3BP	CENP-R	63920108	63975784
P27987	-	HGNC6179	1	ITPKB	IPK	226822401	226834937
P07476	+	HGNC6187	1	IVL	Involucrin_N	152882274	152882480	Involucrin	152882583	152882609	Involucrin	152882739	152882768	Involucrin	152882769	152882798	Involucrin	152882799	152882828	Involucrin	152882829	152882858	Involucrin	152882859	152882888	Involucrin	152882889	152882918	Involucrin	152882919	152882948	Involucrin	152882949	152882978	Involucrin	152882979	152883008	Involucrin	152883012	152883038	Involucrin	152883042	152883068	Involucrin	152883069	152883098	Involucrin	152883099	152883128
Q9Y6Y0	-	HGNC16951	1	IVNS1ABP	BTB	185276767	185278561	BACK	185274748	185276751	Kelch_1	185269604	185270154	Kelch_1	185269367	185269600	Kelch_1	185269134	185269363	Kelch_1	185268878	185269130	Kelch_1	185267316	185268874	Kelch_1	185267181	185267312
P23458	-	HGNC6190	1	JAK1	Pkinase_Tyr	65307152	65316494	Pkinase_Tyr	65300262	65306953
Q9H9V9	-	HGNC25724	1	JMJD4	JmjC	227920698	227921635
O76095	-	HGNC6201	1	JTB	JTB	153947166	153949463
P05412	-	HGNC6204	1	JUN	Jun	59248019	59248729	bZIP_1	59247803	59247994
Q5T7N3	-	HGNC27263	1	KANK4	KN_motif	62740589	62740705	Ank_2	62713248	62728901	Ank_2	62703966	62713328
Q674X7	+	HGNC29173	1	KAZN	SAM_1	15420783	15421409	SAM_1	15428061	15428246	SAM_2	15429900	15430650
P16389	-	HGNC6220	1	KCNA2	BTB_2	111147026	111147301	Ion_trans	111146141	111146920
P22001	-	HGNC6221	1	KCNA3	BTB_2	111216840	111217115	Ion_trans	111215958	111216734
Q16322	-	HGNC6219	1	KCNA10	BTB_2	111060872	111061147	Ion_trans	111060005	111060766
Q13303	+	HGNC6229	1	KCNAB2	Aldo_ket_red	6111747	6156815
Q03721	+	HGNC6236	1	KCNC4	Potassium_chann	110754122	110754208	BTB_2	110754233	110754550	Ion_trans	110754794	110766356
Q9UK17	-	HGNC6239	1	KCND3	Shal-type	112525255	112525341	BTB_2	112524955	112525224	Ion_trans	112329592	112524804	DUF3399	112319724	112323358
O95259	-	HGNC6250	1	KCNH1	PAS_9	211263937	211280710	Ion_trans	210977440	211192507	cNMP_binding	210948749	210970969
Q92806	+	HGNC6270	1	KCNJ9	IRK	160053893	160057475
P78508	-	HGNC6256	1	KCNJ10	IRK	160011233	160012231
O00180	+	HGNC6272	1	KCNK1	Ion_trans_2	233750161	233802459	Ion_trans_2	233802553	233807078
O95069	+	HGNC6277	1	KCNK2	Ion_trans_2	215260013	215342657	Ion_trans_2	215345379	215368411
Q9UGI6	-	HGNC6292	1	KCNN3	SK_channel	154744737	154841620	Ion_trans_2	154698436	154744502	CaMBD	154680727	154698396
P56696	+	HGNC6298	1	KCNQ4	Ion_trans	41250057	41285881	KCNQ_channel	41296853	41304069
Q6UVM3	-	HGNC18866	1	KCNT2	Ion_trans_2	196397372	196434465	BK_channel_a	196309675	196367716
Q9Y597	+	HGNC21305	1	KCTD3	BTB_2	215741086	215751354
Q8NAX2	-	HGNC26624	1	KDF1	DUF4656	27276562	27278771
O60341	+	HGNC29079	1	KDM1A	SWIRM	23370928	23381563	Amino_oxidase	23381633	23409704
O75164	+	HGNC22978	1	KDM4A	JmjN	44118889	44121270	JmjC	44128658	44132720	PHD_2	44156672	44157225	zf-HC5HC2H_2	44157241	44160547
Q9UGL1	-	HGNC18039	1	KDM5B	JmjN	202777235	202777336	ARID	202742272	202743850	PHD	202729542	202729688	JmjC	202719801	202724480	zf-C5HC2	202715076	202715393	PLU-1	202705340	202715039	PHD	202702765	202702905	PHD	202698184	202698875
Q07666	+	HGNC18116	1	KHDRBS1	Qua1	32479900	32495981	KH_3	32497131	32498803	Sam68-YY	32503626	32508138
Q9UPP5	+	HGNC29192	1	KIAA1107	DUF4596	92649753	92649884
Q5VZ46	+	HGNC29327	1	KIAA1614	DUF4685	180887049	180904479
Q8IYS2	-	HGNC28513	1	KIAA2013	DUF2152	11982692	11986278
O60333	+	HGNC16636	1	KIF1B	Kinesin	10292417	10338068	Kinesin_assoc	10338078	10355218	FHA	10355219	10356974	KIF1B	10384116	10386169	DUF3694	10406010	10421818	PH	10434919	10435420
Q99661	+	HGNC6393	1	KIF2C	Kinesin	45221631	45228030
Q15058	-	HGNC19181	1	KIF14	Kinesin	200571072	200586761	Kinesin_assoc	200567441	200569550	FHA	200561347	200567440
Q9P2E2	-	HGNC19167	1	KIF17	Kinesin	21031057	21044168
O75037	-	HGNC29442	1	KIF21B	Kinesin	200972815	200992471	WD40	200948820	200950174	WD40	200944788	200946019	WD40	200943297	200943926
Q2KJY2	+	HGNC25484	1	KIF26B	Kinesin	245765939	245847679
Q92845	-	HGNC17060	1	KIFAP3	KAP	169930199	170024572
Q96J84	+	HGNC15734	1	KIRREL	I-set	158045911	158054213	C2-set_2	158047930	158056502	Ig_2	158058122	158059414	Ig_3	158059510	158061303
Q15726	-	HGNC6341	1	KISS1	Kisspeptin	204159662	204159892
Q5VTJ3	+	HGNC26791	1	KLHDC7A	Kelch_1	18809063	18809203	Kelch_1	18809207	18809332
Q8IYD2	-	HGNC25573	1	KLHDC8A	Kelch_1	205312534	205312674	Kelch_1	205312399	205312530	Kelch_6	205308442	205308822	Kelch_1	205306640	205307682
Q8NEP7	+	HGNC28489	1	KLHDC9	Kelch_3	161068434	161068583	Kelch_3	161068599	161068745
Q53G59	-	HGNC19360	1	KLHL12	BTB	202887475	202894223	BACK	202880187	202887462	Kelch_1	202864839	202866085	Kelch_1	202864686	202864832	Kelch_1	202863773	202864682	Kelch_1	202863324	202863769	Kelch_1	202862425	202863320	Kelch_1	202861705	202862421
Q6TDP4	+	HGNC24023	1	KLHL17	BTB	896809	897283	BACK	897296	898143	Kelch_1	898255	898574	Kelch_1	898578	898798	Kelch_1	898802	899354	Kelch_1	899358	899761	Kelch_1	899765	899902	Kelch_1	899906	900472
Q9Y2M5	+	HGNC25056	1	KLHL20	BTB	173703000	173703323	BACK	173703336	173722411	Kelch_1	173725153	173726203	Kelch_1	173726207	173735315	Kelch_1	173735337	173743489	Kelch_1	173743493	173744825	Kelch_1	173744829	173744966	Kelch_1	173744970	173754319
Q9UJP4	-	HGNC29041	1	KLHL21	BTB	6662478	6662804	BACK	6662160	6662465	Kelch_1	6661914	6662036	Kelch_1	6659426	6661904	Kelch_6	6653568	6653717
O15229	+	HGNC6381	1	KMO	FAD_binding_3	241695766	241750013
A6PVL3	-	HGNC26488	1	KNCN	Kinocilin	47013039	47013407
O60684	+	HGNC6399	1	KPNA6	IBB	32620209	32623021	Arm	32625040	32626245	Arm	32626249	32627617	Arm	32627621	32628057	Arm	32628061	32628893	Arm	32628897	32631810	Arm	32631814	32632874	Arm	32632881	32635588	Arm_3	32635628	32636426
Q8N6L1	-	HGNC28942	1	KRTCAP2	Keratin_assoc	155142005	155145771
Q96EK9	-	HGNC25160	1	KTI12	KTI12	52498383	52499432
Q5T7N2	+	HGNC25595	1	L1TD1	Transposase_22	62672940	62673308	Transposase_22	62675998	62677038
A8MY62	-	HGNC35445	1	LACTBL1	Beta-lactamase	23280185	23291850
Q13751	-	HGNC6490	1	LAMB3	Laminin_N	209806005	209823415	Laminin_EGF	209803963	209806001	Laminin_EGF	209803085	209803267	Laminin_EGF	209801383	209801532	Laminin_EGF	209800778	209800921	Laminin_EGF	209800215	209800771	Laminin_EGF	209799204	209799368
P11047	+	HGNC6492	1	LAMC1	Laminin_N	182992999	183077539	Laminin_EGF	183079624	183079785	Laminin_EGF	183083668	183083829	Laminin_EGF	183083836	183084770	Laminin_EGF	183085716	183085950	Laminin_B	183086562	183090931	Laminin_EGF	183091037	183091298	Laminin_EGF	183091299	183093833	Laminin_EGF	183093846	183094007	Laminin_EGF	183094534	183094680	Laminin_EGF	183095256	183095393	Laminin_EGF	183096363	183096518
Q13753	+	HGNC6493	1	LAMC2	Laminin_EGF	183177018	183177179	Laminin_EGF	183177186	183184709	Laminin_EGF	183187535	183190008	Laminin_B	183191331	183195906	Laminin_EGF	183195892	183196005	Laminin_EGF	183196748	183197582	Laminin_EGF	183197589	183197750	Laminin_EGF	183200098	183200232
Q9Y2Q5	+	HGNC29796	1	LAMTOR2	Robl_LC7	156024693	156027822
O43504	-	HGNC17955	1	LAMTOR5	LAMTOR5	110950224	110950487
Q13571	-	HGNC29612	1	LAPTM5	Mtp	31206680	31230510
Q8IWV1	+	HGNC26005	1	LAX1	LAX	203734775	203743806
Q14739	-	HGNC6518	1	LBR	LBR_tudor	225611612	225611776	ERG4_ERG24	225591007	225607057
Q5T7P2	+	HGNC29459	1	LCE1A	LCE	152800012	152800278
Q5T7P3	+	HGNC16611	1	LCE1B	LCE	152784983	152785105	LCE	152785097	152785276
Q5T751	-	HGNC29464	1	LCE1C	LCE	152777774	152777890	LCE	152777600	152777779
Q5T752	+	HGNC29465	1	LCE1D	LCE	152770277	152770438	LCE	152770430	152770612
Q5T753	+	HGNC29466	1	LCE1E	LCE	152759839	152759955	LCE	152759950	152760129
Q5T754	+	HGNC29467	1	LCE1F	LCE	152748914	152749036	LCE	152749019	152749201
Q5TA79	+	HGNC29469	1	LCE2A	LCE	152671435	152671695
O14633	+	HGNC16610	1	LCE2B	LCE	152659389	152659649
Q5TA81	+	HGNC29460	1	LCE2C	LCE	152648561	152648662	LCE	152648648	152648821
Q5TA82	+	HGNC16518	1	LCE2D	LCE	152636651	152636752	LCE	152636738	152636911
Q5TA76	-	HGNC29461	1	LCE3A	LCE	152595312	152595563
Q5TA77	+	HGNC29462	1	LCE3B	LCE	152586320	152586571
Q5T5A8	+	HGNC16612	1	LCE3C	LCE	152573241	152573489
Q9BYE3	-	HGNC16615	1	LCE3D	LCE	152552136	152552378
Q5T5B0	-	HGNC29463	1	LCE3E	LCE	152538408	152538650
Q5TA78	+	HGNC16613	1	LCE4A	LCE	152681558	152681848
Q5TCM9	+	HGNC16614	1	LCE5A	LCE	152484092	152484334
A0A183	+	HGNC31824	1	LCE6A	LCE6A	152815997	152816227
P06239	+	HGNC6524	1	LCK	SH3_1	32740605	32740982	SH2	32741171	32741660	Pkinase_Tyr	32742039	32751269
Q5T700	-	HGNC32069	1	LDLRAD1	Ldl_recept_a	54477816	54477929
Q5SZI1	+	HGNC32071	1	LDLRAD2	Ldl_recept_a	22141316	22142563
Q5SW96	+	HGNC18640	1	LDLRAP1	PID	25880466	25889197
O75610	-	HGNC6552	1	LEFTY1	TGFb_propeptide	226075133	226076699	TGF_beta	226074468	226074746
O00292	-	HGNC3122	1	LEFTY2	TGFb_propeptide	226127095	226128614	TGF_beta	226125182	226125460
Q5T871	+	HGNC32046	1	LELP1	LELP1	153177184	153177477
Q68G75	-	HGNC18725	1	LEMD1	LEM	205388436	205389657
Q9Y5L5	+	HGNC14429	1	LENEP	LEP503	154966084	154966266
P48357	+	HGNC6554	1	LEPR	Lep_receptor_Ig	66064481	66067340
O15243	+	HGNC29477	1	LEPROT	Vps55	65890988	65897578
O00214	+	HGNC6569	1	LGALS8	Gal-bind_lectin	236700803	236703971	Gal-bind_lectin	236706221	236711329
Q9HBX8	+	HGNC19719	1	LGR6	LRR_8	202194609	202245455	LRR_8	202205105	202245599	LRR_8	202245567	202266657	LRR_8	202266688	202272422	LRR_8	202272459	202276017	LRR_8	202274861	202278200
Q969G2	+	HGNC21734	1	LHX4	LIM	180217431	180235533	LIM	180235543	180235722	Homeobox	180240535	180241005
Q68G74	+	HGNC28838	1	LHX8	LIM	75602902	75608809	LIM	75608819	75608992	Homeobox	75609595	75622613
Q9NQ69	+	HGNC14222	1	LHX9	LIM	197889138	197890440	LIM	197890453	197890626	Homeobox	197896789	197898167
Q5TKA1	-	HGNC30830	1	LIN9	DIRP	226465512	226475431
Q9H9Z2	+	HGNC15986	1	LIN28A	CSD	26737963	26751901	zf-CCHC	26751974	26752781
Q6UY18	-	HGNC31814	1	LINGO4	LRR_8	151774820	151774996	LRR_8	151774676	151774846	LRR_8	151774532	151774714	LRR_8	151774244	151774426	LRR_8	151774100	151774261	I-set	151773677	151773934
Q8IVB5	+	HGNC28715	1	LIX1L	LIX1	145477396	145498748
P02545	+	HGNC6636	1	LMNA	Filament	156084797	156106005	LTD	156106144	156107468
P61968	+	HGNC6644	1	LMO4	LIM	87797765	87805225	LIM	87805241	87805825
P29536	-	HGNC6647	1	LMOD1	Tropomodulin	201869777	201915455	WH2	201867502	201868429
Q8TE12	-	HGNC6653	1	LMX1A	LIM	165218870	165322472	LIM	165218684	165218860	Homeobox	165177360	165182960
P23490	+	HGNC6663	1	LOR	Loricrin	153233426	153234361
Q9UBY5	-	HGNC14298	1	LPAR3	7tm_1	85279711	85331664
Q92604	-	HGNC28985	1	LPGAT1	Acyltransferase	211956613	212002400	Acyltransf_C	211923318	211952302
Q5T3J3	-	HGNC30299	1	LRIF1	LRIF1	111490586	111495435
O94898	+	HGNC20889	1	LRIG2	LRR_8	113636101	113637030	LRR_8	113637292	113638589	LRR_8	113638557	113638937	LRR_8	113638623	113641348	LRR_8	113638899	113642854	LRRCT	113650304	113652865	Ig_3	113652875	113653138	I-set	113655106	113655378	I-set	113657054	113657317
Q14114	-	HGNC6700	1	LRP8	Ldl_recept_a	53792545	53792655	Ldl_recept_a	53755239	53755355	Ldl_recept_a	53746265	53746381	Ldl_recept_a	53742643	53746261	Ldl_recept_a	53742511	53742636	Ldl_recept_a	53742364	53742477	Ldl_recept_a	53741309	53741419	FXa_inhibition	53736902	53737006	Ldl_recept_b	53729977	53732187	Ldl_recept_b	53729848	53729970	Ldl_recept_b	53727874	53729841	Ldl_recept_b	53727739	53727867	Ldl_recept_b	53726154	53726276
Q96NW7	+	HGNC18531	1	LRRC7	LRR_8	70226023	70291435	LRR_8	70300488	70397244	LRR_8	70446083	70452056	LRR_8	70478669	70482217	PDZ	70555413	70587552
Q6P9F7	+	HGNC30692	1	LRRC8B	Pannexin_like	90048210	90049211	LRR_8	90050175	90058332
Q8TDW0	+	HGNC25075	1	LRRC8C	Pannexin_like	90152033	90179143	LRR_8	90179894	90180076	LRR_8	90180038	90180214
Q7L1W4	+	HGNC16992	1	LRRC8D	Pannexin_like	90398628	90399779	LRR_8	90400530	90400712	LRR_8	90400674	90400850
Q5VT99	-	HGNC27005	1	LRRC38	LRR_1	13839710	13839775	LRR_8	13839527	13839706
Q96DD0	-	HGNC28228	1	LRRC39	LRR_8	100620716	100621860
Q9H9A6	-	HGNC26004	1	LRRC40	LRR_8	70650584	70654863	LRR_8	70646871	70650586	LRR_8	70646802	70650553	LRR_8	70644572	70646834	LRR_8	70641497	70644544	LRR_1	70614186	70614245
Q8N1G4	-	HGNC29207	1	LRRC47	LRR_8	3712545	3712739	LRR_8	3712467	3712655	LRR_8	3703778	3712505	B3_4	3698078	3703495
Q8N7C0	+	HGNC32156	1	LRRC52	LRR_8	165513762	165513941	LRR_8	165513906	165514088
A6NM62	-	HGNC25255	1	LRRC53	LRR_8	74946461	74946640	LRR_8	74946311	74946457	LRR_8	74946161	74946349
O75325	-	HGNC16914	1	LRRN2	LRR_8	204588733	204588915	LRR_8	204588661	204588795	LRR_8	204588517	204588687	LRR_8	204588445	204588627	LRR_8	204588301	204588483	LRR_8	204588226	204588411	LRR_8	204588157	204588339	LRR_8	204588007	204588192	I-set	204587578	204587841
Q969L4	-	HGNC17562	1	LSM10	LSM	36859478	36859675
Q96LR2	+	HGNC32327	1	LURAP1	LURAP	46669213	46685649
Q9HBG7	+	HGNC6730	1	LY9	Ig_3	160783437	160783649	Ig_3	160786395	160786604
O95372	+	HGNC6738	1	LYPLA2	Abhydrolase_2	24119203	24121210
Q5VWZ2	+	HGNC20440	1	LYPLAL1	Abhydrolase_2	219347257	219385043
Q96S90	-	HGNC32070	1	LYSMD1	LysM	151134501	151137610
Q99698	-	HGNC1968	1	LYST	PH_BEACH	235884175	235892943	Beach	235866154	235884123
Q8WZA0	-	HGNC17497	1	LZIC	ICAT	9990465	9992955
Q8N8X9	+	HGNC26787	1	MAB21L3	Mab-21	116663676	116675953
Q9UPN3	+	HGNC13664	1	MACF1	CH	39696865	39723685	CH	39747916	39749136	Plectin	39796977	39797102	Plectin	39797208	39797333	Plectin	39797550	39797675	Plectin	39797667	39797789	Plectin	39799116	39799241	Plectin	39799344	39799469	Plectin	39799458	39799562	Plectin	39799746	39799871	Plectin	39800304	39800429	Spectrin	39823251	39824392	Spectrin	39824405	39826532	Spectrin	39844976	39847683	Spectrin	39852891	39853214
Q9UI95	-	HGNC6764	1	MAD2L2	HORMA	11735714	11740621
Q96JY0	+	HGNC25929	1	MAEL	HMG_box_2	166958593	166959060	Maelstrom	166961979	166987142
Q5TCQ9	+	HGNC29647	1	MAGI3	Guanylate_kin	114092184	114128043	WW	114133225	114137136	GVQW	114162368	114162442	PDZ	114165559	114184717	PDZ	114193636	114196507	PDZ	114196637	114214420	PDZ	114216034	114225565
P61326	-	HGNC6815	1	MAGOH	Mago_nashi	53692719	53704107
O60476	+	HGNC6822	1	MAN1A2	Glyco_hydro_47	117948171	118065531
Q9NR34	+	HGNC19080	1	MAN1C1	Glyco_hydro_47	26012931	26110238
Q5VSG8	+	HGNC26452	1	MANEAL	Glyco_hydro_99	38260152	38265851
Q9BXW4	-	HGNC13353	1	MAP1LC3C	Atg8	242159530	242162130
O95382	-	HGNC6858	1	MAP3K6	DUF4071	27688252	27691358	Pkinase	27684967	27687304
Q3KQU3	+	HGNC25514	1	MAP7D1	MAP7	36644052	36645118
Q9P2G4	+	HGNC29265	1	MAP10	DUF4497	232941025	232941339	HPHLAWLY	232941586	232943481
P49137	+	HGNC6887	1	MAPKAPK2	Pkinase	206858764	206905067
Q5VT66	+	HGNC26189	1	MARC1	MOSC_N	156273787	156274456	MOSC	156276256	156281424
Q969Z3	+	HGNC26064	1	MARC2	MOSC_N	232940929	232941294	MOSC	232941364	232941765
P49006	-	HGNC7142	1	MARCKSL1	MARCKS	32800623	32801630	MARCKS	32800200	32800658
Q9P0L2	+	HGNC6896	1	MARK1	Pkinase	220752822	220804400	UBA	220804458	220805634	KA1	220835371	220835505
O00187	-	HGNC6902	1	MASP2	CUB	11106622	11107111	EGF_CA	11105468	11106612	CUB	11102941	11103586	Sushi	11094888	11097859	Sushi	11090239	11090930	Trypsin	11086965	11087669
Q6P0Q8	+	HGNC19035	1	MAST2	DUF1908	46463404	46488583	Pkinase	46488953	46495537	PDZ	46497975	46499500
P21941	-	HGNC6907	1	MATN1	VWA	31191600	31194571	FXa_inhibition	31189640	31189747	VWA	31188025	31189139	Matrilin_ccoil	31186434	31188012
Q07820	-	HGNC6943	1	MCL1	Bcl-2	150550719	150551369
Q8IZK6	-	HGNC13357	1	MCOLN2	PKD_channel	85397047	85403764
Q8TDD5	-	HGNC13358	1	MCOLN3	PKD_channel	85486755	85491629
O15151	+	HGNC6974	1	MDM4	SWIB	204494719	204499943	zf-RanBP	204516000	204518324	zf-C3HC4_3	204518637	204518789
Q9HAF1	-	HGNC25674	1	MEAF6	NuA4	37975061	37980298
Q9BV79	-	HGNC19691	1	MECR	ADH_N	29533400	29543165	ADH_zinc_N	29520659	29529712
Q96G25	-	HGNC19971	1	MED8	Med8	43850724	43855434
Q9BUE0	+	HGNC25944	1	MED18	Med18	28657228	28661097	Med18	28661035	28661475
Q14814	-	HGNC6997	1	MEF2D	SRF-TF	156452315	156453056	HJURP_C	156449522	156450753
O75095	-	HGNC3232	1	MEGF6	FXa_inhibition	3440691	3440798	FXa_inhibition	3431969	3432079	EGF_CA	3428573	3431113	FXa_inhibition	3428117	3428224	EGF_CA	3427350	3428113	FXa_inhibition	3426437	3426544	Laminin_EGF	3422750	3424445	Laminin_EGF	3416438	3417289	Laminin_EGF	3413642	3413883	Laminin_EGF	3413297	3413641	Laminin_EGF	3410644	3411033
Q5VVY1	+	HGNC31932	1	METTL11B	Methyltransf_PK	170129694	170136880
Q8N6R0	+	HGNC24248	1	METTL13	Methyltransf_11	171752883	171753200	Spermine_synth	171759687	171765677
O95568	-	HGNC28793	1	METTL18	Methyltransf_23	169761810	169762331
A1L020	-	HGNC33482	1	MEX3A	KH_1	156047348	156051392	KH_1	156047075	156047254	zf-C3HC4_3	156046382	156046531
P55001	-	HGNC7033	1	MFAP2	MAGP	17301513	17304767	ShK	17301417	17301512
O95140	+	HGNC16877	1	MFN2	Dynamin_N	12052731	12059113	Fzo_mitofusin	12066658	12071610
Q8NA29	+	HGNC25897	1	MFSD2A	MFS_2	40422798	40434376
Q8N468	+	HGNC25433	1	MFSD4	MFS_1	205538258	205566924
O14880	+	HGNC7064	1	MGST3	MAPEG	165619115	165624681
Q5JRA6	+	HGNC24008	1	MIA3	SH3_2	222794512	222798157
Q96AX9	+	HGNC30577	1	MIB2	MIB_HERC2	1551921	1558895	ZZ	1558914	1559045	MIB_HERC2	1559213	1560259	Ank_2	1562268	1562714	Ank_4	1562361	1562684	Ank_3	1562718	1562807	Ank_2	1563060	1563542	Ank_5	1563405	1563656	zf-C3HC4_3	1564621	1564831	zf-C3HC4_3	1564931	1565721
Q8N108	+	HGNC29657	1	MIER1	ELM2	67424576	67425426	Myb_DNA-binding	67436574	67437406
Q5JXC2	+	HGNC25715	1	MIIP	MIIP	12082152	12091832
Q5TGZ0	+	HGNC32068	1	MINOS1	DUF543	19923540	19950044
Q9H2W2	+	HGNC13363	1	MIXL1	Homeobox	226411641	226413219
Q9BUB5	-	HGNC7110	1	MKNK1	Pkinase	47037188	47046287	Pkinase	47027155	47037097
Q13015	+	HGNC16997	1	MLLT11	AF1Q	151039701	151039895
Q9Y4U1	+	HGNC24525	1	MMACHC	MMACHC	45966062	45974740
Q495T6	-	HGNC14668	1	MMEL1	Peptidase_M13_N	2526765	2541228	Peptidase_M13	2522434	2525856
O75900	+	HGNC7171	1	MMP23B	Peptidase_M10	1568264	1569369	ShK	1569291	1569474
P41218	+	HGNC7183	1	MNDA	PYRIN	158811965	158812192	HIN	158815428	158817652
Q70IA8	-	HGNC29800	1	MOB3C	Mob1_phocein	47075829	47080651
Q5T089	-	HGNC25852	1	MORN1	MORN	2321406	2322905	MORN	2319741	2321396	MORN	2318966	2319740	MORN	2318891	2318959	MORN	2317301	2318890	MORN	2316491	2317300	MORN	2316422	2316490	MORN	2305933	2316421
Q9HCE1	+	HGNC7200	1	MOV10	AAA_11	113237390	113238778	AAA_11	113238776	113239343	AAA_12	113239362	113242575
O95563	-	HGNC24515	1	MPC2	MPC	167887563	167905000
P40238	+	HGNC7217	1	MPL	EpoR_lig-bind	43803592	43804384	fn3	43812468	43814630
P25189	-	HGNC7225	1	MPZ	V-set	161276504	161277184	Myelin-PO_C	161275668	161276152
O95297	+	HGNC7226	1	MPZL1	V-set	167734849	167741718
Q95460	+	HGNC4975	1	MR1	MHC_I	181003210	181019412	C1-set	181021394	181021636
Q9BYD2	-	HGNC14277	1	MRPL9	Ribosomal_L9_N	151734866	151735495
Q9BYC9	-	HGNC14478	1	MRPL20	Ribosomal_L20	1337564	1342566
Q96A35	-	HGNC14037	1	MRPL24	KOW	156708149	156708324
Q9BZE1	+	HGNC14034	1	MRPL37	PDCD9	54671020	54683910
Q7Z7F7	-	HGNC16686	1	MRPL55	Mitoc_L55	228294580	228295783
O60783	-	HGNC14049	1	MRPS14	Ribosomal_S14	174983810	174983971
P82914	-	HGNC14504	1	MRPS15	Ribosomal_S15	36921859	36926358
P82921	+	HGNC14046	1	MRPS21	Ribosomal_S21	150266817	150280590
Q9UKD2	+	HGNC18477	1	MRTO4	Ribosomal_L10	19581299	19584348
O15457	+	HGNC7327	1	MSH4	MutS_II	76272701	76282136	MutS_III	76282185	76347030	MutS_IV	76343940	76345818	MutS_V	76347052	76365385
Q9BUK6	+	HGNC29678	1	MSTO1	Misat_Tub_SegII	155580055	155581076	Tubulin_3	155581515	155582706
P0DM35	-	HGNC31864	1	MT1HL1	Metallothio	237167489	237167671
Q9Y483	+	HGNC29535	1	MTF2	PHD	93580268	93580633	Mtf2_C	93602432	93602575
Q9H019	+	HGNC28836	1	MTFR1L	Mito_fiss_reg	26150138	26156313
P42898	-	HGNC7436	1	MTHFR	MTHFR	11855174	11863031
A4FU01	-	HGNC24307	1	MTMR11	Myotub-related	149905323	149906391	Myotub-related	149902698	149905358	3-PAP	149901116	149902261
P42345	-	HGNC3942	1	MTOR	DUF3385	11276249	11291445	FAT	11188998	11210215	Rapamycin_bind	11187078	11187853	PI3_PI4_kinase	11174381	11184675	FATC	11167544	11168319
Q99707	+	HGNC7468	1	MTR	S-methyl_trans	236966784	236992507	Pterin_bind	236995313	237016274	B12-binding_2	237023190	237025583	B12-binding	237026766	237044082	Met_synt_B12	237052522	237060884
Q13505	+	HGNC7504	1	MTX1	Tom37	155179061	155180412	Tom37_C	155181969	155182358	Tom37_C	155182314	155183118
Q969V5	-	HGNC25762	1	MUL1	GIDE	20827473	20828607	zf-C3HC4_3	20827203	20827349
Q9UIF7	-	HGNC7527	1	MUTYH	HhH-GPD	45797966	45798836
Q9BRK3	-	HGNC7542	1	MXRA8	V-set	1290630	1291096	V-set	1290134	1290505
Q13203	-	HGNC7552	1	MYBPH	fn3	203143594	203144580	I-set	203140514	203141153	fn3	203139458	203140319	I-set	203138037	203138466
A2RUH7	-	HGNC30434	1	MYBPHL	I-set	109840047	109840855	fn3	109839441	109839802	I-set	109837736	109838941
P12524	-	HGNC7555	1	MYCL	Myc_N	40366758	40367559	Myc_N	40363535	40366760	HLH	40363226	40363384
Q99972	-	HGNC7610	1	MYOC	OLF	171605076	171605837
P15173	-	HGNC7612	1	MYOG	Basic	203054846	203055088	HLH	203054690	203054845
Q5VTT5	-	HGNC26679	1	MYOM3	I-set	24424416	24432509	I-set	24419440	24421459	fn3	24417341	24418775	fn3	24413170	24416137	fn3	24409119	24411120	fn3	24407868	24408669	fn3	24402685	24407819	ig	24390583	24393554	I-set	24383895	24385460
Q5VVJ2	-	HGNC29401	1	MYSM1	Myb_DNA-binding	59150833	59154756	SWIRM	59142604	59147595	JAB	59131288	59134657
O95544	-	HGNC29831	1	NADK	NAD_kinase	1686030	1691288
P49321	+	HGNC7644	1	NASP	SHNi-TPR	46079996	46080755	TPR_1	46080768	46080869
P41271	+	HGNC7650	1	NBL1	DAN	19969872	19981910
Q3BBV0	-	HGNC26088	1	NBPF1	DUF1220	16920025	16921503	DUF1220	16914252	16915488	DUF1220	16907950	16909183	DUF1220	16905884	16907411	DUF1220	16903886	16905853	DUF1220	16902826	16903855	DUF1220	16901100	16902795	DUF1220	16895617	16901009
Q9H094	+	HGNC25076	1	NBPF3	DUF1220	21799383	21800029	DUF1220	21801419	21804796	DUF1220	21805868	21806712	DUF1220	21807449	21808258	DUF1220	21809003	21809804
Q96M43	-	HGNC26550	1	NBPF4	DUF1220	108781421	108782474	DUF1220	108778943	108781369	DUF1220	108776867	108777882	DUF1220	108774881	108775806
Q5VWK0	+	HGNC31988	1	NBPF6	DUF1220	108997114	108998167	DUF1220	108998219	109000558	DUF1220	109000637	109002633	DUF1220	109002664	109004619
Q3BBV2	+	HGNC31990	1	NBPF8	DUF1220	144149849	144151538	DUF1220	144159763	144160545	DUF1220	144161330	144162167	DUF1220	144162912	144163736	DUF1220	144163767	144165280	DUF1220	144165311	144166870	DUF1220	144167672	144168427
Q3BBW0	+	HGNC31991	1	NBPF9	DUF1220	148259158	148260052	DUF1220	148271032	148330124	DUF1220	148330200	148335580	DUF1220	148335611	148336269	DUF1220	148337340	148338368	DUF1220	148338456	148340418
Q6P3W6	+	HGNC31992	1	NBPF10	DUF1220	145297666	145298314	DUF1220	145303957	145304603	DUF1220	145305971	145310059	DUF1220	145311129	145311954	DUF1220	145312704	145313502	DUF1220	145314242	145315072
Q86T75	-	HGNC31993	1	NBPF11	DUF1220	146052603	146053250	DUF1220	146046338	146046984	DUF1220	146040893	146044973	DUF1220	146038993	146039820	DUF1220	146037453	146038243	DUF1220	146035864	146036713
Q5TAG4	+	HGNC24297	1	NBPF12	DUF1220	146395375	146397411	DUF1220	146397442	146398467	DUF1220	146399602	146400259
Q5TI25	-	HGNC25232	1	NBPF14	DUF1220	148342519	148343752	DUF1220	148341795	148341980	DUF1220	148338455	148340417	DUF1220	148337396	148338424	DUF1220	148335667	148337365	DUF1220	148330190	148335579	DUF1220	148328286	148330159	DUF1220	148326742	148328255	DUF1220	148325148	148326711	DUF1220	148323524	148324346
Q8N660	+	HGNC28791	1	NBPF15	DUF1220	148581843	148582489	DUF1220	148583852	148587947	DUF1220	148589020	148589829	DUF1220	148590579	148591369	DUF1220	148592109	148592959	DUF1220	148593758	148594565
Q3BBV1	+	HGNC32000	1	NBPF20	DUF1220	144181146	144182045	DUF1220	144185991	144187523	DUF1220	144187599	144189111	DUF1220	144189142	144190681	DUF1220	144190712	144192248	DUF1220	144192279	144193802	DUF1220	144193890	144195443
Q9UBB6	+	HGNC17597	1	NCDN	Neurochondrin	36024762	36030985
P19878	-	HGNC7661	1	NCF2	TPR_1	183556076	183559355	TPR_1	183546796	183556075	SH3_1	183536105	183536457	PB1	183532332	183532695	SH3_1	183525309	183529311
Q92542	+	HGNC17091	1	NCSTN	Nicastrin	160321572	160325694
Q9BTX1	-	HGNC25525	1	NDC1	Ndc1_Nup	54233666	54303879
O75306	+	HGNC7708	1	NDUFS2	Complex1_49kDa	161179335	161183980
O43920	+	HGNC7712	1	NDUFS5	Ndufs5	39494397	39500135
Q9NVZ3	+	HGNC25528	1	NECAP2	DUF1681	16767272	16775696
Q7Z3B1	-	HGNC17302	1	NEGR1	I-set	72400765	72748050	I-set	72163694	72241974	I-set	72058500	72076823
P51955	-	HGNC7745	1	NEK2	Pkinase	211842626	211848799
Q8TDX7	+	HGNC13386	1	NEK7	Pkinase	198222212	198288619
Q9UMX5	+	HGNC30384	1	NENF	Cyt-b5	212606421	212619261
P48681	-	HGNC7756	1	NES	Filament	156646576	156647037	Filament	156643291	156646524
Q0ZGT2	+	HGNC29557	1	NEXN	I-set	78408230	78408499
O94856	+	HGNC29866	1	NFASC	I-set	204921150	204923508	ig	204923980	204926914	I-set	204937418	204938106	I-set	204939749	204942543	I-set	204943327	204943947	I-set	204944404	204945919	fn3	204948104	204948653	fn3	204949506	204951117	fn3	204953163	204955211	fn3	204956551	204957900	fn3	204970309	204971851	Bravo_FIGEY	204978789	204985592
Q12857	+	HGNC7784	1	NFIA	NfI_DNAbd_pre-N	61547631	61548466	MH1	61553860	61554174	CTF_NFI	61554298	61872368
Q13952	+	HGNC7806	1	NFYC	CBFD_NFYB_HMF	41213221	41218846
P01138	-	HGNC7808	1	NGF	NGF	115828702	115829034
Q02575	+	HGNC7817	1	NHLH1	HLH	160340747	160340905
Q02577	-	HGNC7818	1	NHLH2	HLH	116380603	116380761
P14543	-	HGNC7821	1	NID1	NIDO	236205543	236208982	G2F	236189313	236201403	EGF_CA	236180451	236187369	cEGF	236175332	236176764	EGF_3	236175230	236175331	Thyroglobulin_1	236154356	236157154	Ldl_recept_b	236145047	236148765	Ldl_recept_b	236144921	236145040	Ldl_recept_b	236143826	236144911	FXa_inhibition	236141184	236141276
Q6P499	+	HGNC25233	1	NIPAL3	Mg_trans_NIPA	24746128	24790567
Q86X76	+	HGNC7828	1	NIT1	CN_hydrolase	161088967	161090489
Q4KMZ8	-	HGNC25743	1	NKAIN1	NKAIN	31654555	31712393
Q96P20	+	HGNC16400	1	NLRP3	PYRIN	247582118	247582360	FISNA	247587163	247587375	NACHT	247587403	247587912
Q9Y5B8	-	HGNC20461	1	NME7	NDK	169256616	169292358	NDK	169102028	169256582
Q9HAN9	+	HGNC17877	1	NMNAT1	CTP_transf_like	10032165	10042606
Q9BZQ4	-	HGNC16789	1	NMNAT2	CTP_transf_like	183221871	183387368
Q9Y3T9	-	HGNC24517	1	NOC2L	Noc2	881603	888577
Q5SY16	-	HGNC26265	1	NOL9	CLP1_P	6592638	6604946
O75052	+	HGNC16859	1	NOS1AP	PID	162040061	162313696
Q04721	-	HGNC7882	1	NOTCH2	EGF	120548066	120548164	EGF	120539947	120548041	EGF	120539836	120539928	EGF_CA	120539707	120539826	EGF	120512359	120529666	EGF_CA	120512227	120512349	EGF	120510730	120510828	EGF_CA	120510146	120510720	EGF	120509095	120510130	EGF	120508172	120509073	EGF	120506413	120508150	EGF	120506305	120506391	EGF	120502117	120506280	EGF	120497847	120502095	EGF	120497718	120497825
Q7Z3S9	+	HGNC31862	1	NOTCH2NL	EGF	145273231	145273329	EGF	145273351	145281376	EGF	145281395	145281487	EGF_CA	145281497	145281628
Q9NP85	-	HGNC13394	1	NPHS2	Band_7	179520562	179533826
Q9BXD5	+	HGNC16781	1	NPL	DHDPS	182763525	182797989
P01160	-	HGNC7939	1	NPPA	ANP	11907181	11907273
P16860	-	HGNC7940	1	NPPB	ANP	11918274	11918366
P16066	+	HGNC7943	1	NPR1	ANF_receptor	153651744	153655047	Pkinase_Tyr	153658300	153660683	Guanylate_cyc	153661698	153665863
Q14994	-	HGNC7969	1	NR1I3	zf-C4	161205640	161206330	Hormone_recep	161199631	161202675
O00482	+	HGNC7984	1	NR5A2	zf-C4	200012949	200014708	Hormone_recep	200017824	200143269
P01111	-	HGNC7989	1	NRAS	Ras	115251230	115258768
Q15466	-	HGNC7961	1	NR0B2	Hormone_recep	27238395	27240304
O43847	-	HGNC7995	1	NRD1	Peptidase_M16	52299750	52305935	Peptidase_M16_C	52281985	52293530	Peptidase_M16_M	52269503	52280477	Peptidase_M16_C	52257737	52269493
Q96IY1	-	HGNC24548	1	NSL1	Mis14	212912004	212960969
Q96CB9	+	HGNC31802	1	NSUN4	Nol1_Nop2_Fmu	46812651	46827419
Q9BXI3	-	HGNC17819	1	NT5C1A	5-nucleotidase	40124840	40131802
Q9Y2I2	+	HGNC23319	1	NTNG1	Laminin_N	107691363	107867542	Laminin_EGF	107937777	107937917	Laminin_EGF	107973374	107973535	Laminin_EGF	107979289	108023243
Q9BSD7	+	HGNC28204	1	NTPCR	NTPase_1	233086466	233113950
P04629	+	HGNC8031	1	NTRK1	TPKR_C2	156837918	156838298	Pkinase_Tyr	156845898	156851386
Q9H093	-	HGNC29558	1	NUAK2	Pkinase	205274372	205290731
Q9Y266	+	HGNC8045	1	NUDC	Nudc_N	27248364	27267968	NuDC	27268074	27269189	CS	27269229	27269556
P0C025	-	HGNC26618	1	NUDT17	NUDIX	145587368	145588973
Q9BZD4	+	HGNC14621	1	NUF2	Nuf2	163295848	163307812
Q8WUM0	-	HGNC18016	1	NUP133	Nucleoporin_C	229588310	229611455
Q5VU65	-	HGNC29915	1	NUP210L	Big_2	154026715	154027307
O15381	-	HGNC8070	1	NVL	Nucleolin_bd	224505463	224517825	AAA	224481991	224491483	AAA	224437958	224473774
Q9UMX2	+	HGNC8097	1	OAZ3	ODC_AZ	151739697	151742696
Q5VST9	+	HGNC15719	1	OBSCN	I-set	228399512	228399781	I-set	228399812	228400087	I-set	228400205	228400468	I-set	228401150	228401398	fn3	228402511	228402771	I-set	228404160	228404378	I-set	228404743	228404985	I-set	228407045	228407278	I-set	228412183	228412416	I-set	228430904	228431143	I-set	228432017	228432265	I-set	228433134	228433367	I-set	228434249	228434485	I-set	228437683	228437928	I-set	228444372	228444608
Q96PB7	-	HGNC17990	1	OLFM3	Noelin-1	102290798	102302574	OLF	102269826	102271726
Q68BL8	-	HGNC24558	1	OLFML2B	OLF	161953473	161954752
Q9NRN5	+	HGNC24956	1	OLFML3	OLF	114523585	114524367
Q96E52	-	HGNC29661	1	OMA1	Peptidase_M48	58971737	58999942
Q9H1Y3	-	HGNC14007	1	OPN3	7tm_1	241761065	241803384
P41143	+	HGNC8153	1	OPRD1	7tm_1	29139091	29189630
Q9UBM4	+	HGNC8158	1	OPTC	LRR_8	203467895	203468886
Q15619	-	HGNC8182	1	OR1C1	7tm_4	247920784	247921617
Q8NG84	+	HGNC19569	1	OR2AK2	7tm_4	248128769	248129599
Q5JQS5	-	HGNC31249	1	OR2B11	7tm_4	247614348	247615181
Q8N628	-	HGNC15005	1	OR2C3	7tm_4	247694886	247695719
Q8NGZ5	+	HGNC15007	1	OR2G2	7tm_4	247751761	247752594
Q8NGZ4	+	HGNC15008	1	OR2G3	7tm_4	247768975	247769811
Q5TZ20	+	HGNC27019	1	OR2G6	7tm_4	248685038	248685868
Q8NH16	+	HGNC8266	1	OR2L2	7tm_4	248201654	248202502
Q8NG85	+	HGNC15009	1	OR2L3	7tm_4	248224071	248224901
Q8NG80	+	HGNC15011	1	OR2L5	7tm_4	248185337	248186170
Q8NGY9	+	HGNC15014	1	OR2L8	7tm_4	248112247	248113077
Q8N349	+	HGNC19578	1	OR2L13	7tm_4	248262756	248263595
Q96R28	+	HGNC8268	1	OR2M2	7tm_4	248343378	248344211
Q8NG83	+	HGNC8269	1	OR2M3	7tm_4	248366460	248367293
Q96R27	+	HGNC8270	1	OR2M4	7tm_4	248402318	248403154
A3KFT3	+	HGNC19576	1	OR2M5	7tm_4	248308540	248309373
Q8NG81	-	HGNC19594	1	OR2M7	7tm_4	248486946	248487779
O43869	+	HGNC8277	1	OR2T1	7tm_4	248569536	248570366
Q6IF00	+	HGNC14725	1	OR2T2	7tm_4	248616192	248617022
Q8NH03	+	HGNC14727	1	OR2T3	7tm_4	248636757	248637590
Q8NH00	+	HGNC15016	1	OR2T4	7tm_4	248525066	248525902
Q6IEZ7	+	HGNC15017	1	OR2T5	7tm_4	248651986	248652825
Q8NHC8	+	HGNC15018	1	OR2T6	7tm_4	248551000	248551830
A6NH00	+	HGNC15020	1	OR2T8	7tm_4	248084398	248085234
Q8NGZ9	-	HGNC19573	1	OR2T10	7tm_4	248756145	248756978
Q8NH01	-	HGNC19574	1	OR2T11	7tm_4	248789514	248790356
Q8NG77	-	HGNC19592	1	OR2T12	7tm_4	248457965	248458798
Q8NH04	-	HGNC31252	1	OR2T27	7tm_4	248813264	248814100
Q8NH02	-	HGNC31253	1	OR2T29	7tm_4	248721856	248722695
Q8NG76	-	HGNC31255	1	OR2T33	7tm_4	248436201	248437037
Q8NGX1	-	HGNC31256	1	OR2T34	7tm_4	248737119	248737952
Q8NGX2	-	HGNC31257	1	OR2T35	7tm_4	248801638	248802465
Q7Z3T1	+	HGNC15021	1	OR2W3	7tm_4	248058979	248059812
A6NFC9	+	HGNC15424	1	OR2W5	7tm_1	247654550	247655014
Q8NH21	+	HGNC14825	1	OR4F5	7tm_4	69160	69978
Q6IEY1	+	HGNC15079	1	OR4F16	7tm_4	367746	368573
Q6IEY1	+	HGNC31275	1	OR4F29	7tm_4	367746	368573
Q8NGZ6	-	HGNC15027	1	OR6F1	7tm_4	247875133	247875966
Q8NGY2	-	HGNC15029	1	OR6K2	7tm_4	158669515	158670351
Q8NGY3	-	HGNC15030	1	OR6K3	7tm_4	158686984	158687814
Q8NGW6	+	HGNC15033	1	OR6K6	7tm_4	158724780	158725610
Q8NGY5	-	HGNC15034	1	OR6N1	7tm_4	158735551	158736381
Q8NGY6	-	HGNC15035	1	OR6N2	7tm_4	158746501	158747334
Q8NGX9	-	HGNC15036	1	OR6P1	7tm_4	158532470	158533303
Q8NGX8	-	HGNC14823	1	OR6Y1	7tm_4	158516956	158517789
P30954	+	HGNC8175	1	OR10J1	7tm_1	159409702	159410448
Q5JRS4	-	HGNC14992	1	OR10J3	7tm_4	159283651	159284355
P0C629	+	HGNC15408	1	OR10J4	7tm_4	159402087	159402917
Q8NHC4	-	HGNC14993	1	OR10J5	7tm_4	159504876	159505706
Q8NGX5	+	HGNC14693	1	OR10K1	7tm_4	158435442	158436275
Q6IF99	-	HGNC14826	1	OR10K2	7tm_4	158389732	158390565
Q8NGX6	+	HGNC14820	1	OR10R2	7tm_4	158449818	158450651
Q8NGX3	-	HGNC14816	1	OR10T2	7tm_4	158368332	158369162
Q8NGY0	-	HGNC14995	1	OR10X1	7tm_4	158548726	158549550
Q8NGY1	+	HGNC14996	1	OR10Z1	7tm_4	158576319	158577152
Q8NGX0	-	HGNC14998	1	OR11L1	7tm_4	248004274	248005107
Q8NGZ3	-	HGNC14999	1	OR13G1	7tm_4	247835431	247836261
Q8NHC5	-	HGNC15022	1	OR14A16	7tm_4	247978116	247978946
Q8NHC7	+	HGNC15026	1	OR14C36	7tm_4	248512161	248512994
A6ND48	-	HGNC19575	1	OR14I1	7tm_4	248844687	248845520
Q13415	-	HGNC8487	1	ORC1	BAH	52861931	52867123	AAA	52847421	52850388	Cdc6_C	52838867	52840540
Q96SU4	+	HGNC16386	1	OSBPL9	PH	52082789	52179730	Oxysterol_BP	52238324	52253407
Q8WVF1	-	HGNC29971	1	OSCP1	Oscp1	36889016	36915921
Q5T2D3	+	HGNC29038	1	OTUD3	OTU	20209217	20224104
Q6GQQ9	-	HGNC16683	1	OTUD7B	UBA_4	149943141	149949429	OTU	149921577	149937740	zf-A20	149915815	149915889
Q12889	-	HGNC8524	1	OVGP1	Glyco_hydro_18	111959020	111969254
Q9BYC2	-	HGNC18606	1	OXCT2	CoA_trans	40236111	40236800	CoA_trans	40235433	40236032
Q32P28	-	HGNC19316	1	P3H1	2OG-FeII_Oxy_3	43212966	43215856
Q13310	-	HGNC8557	1	PABPC4	RRM_1	40038202	40041586	RRM_1	40035673	40038150	RRM_1	40034566	40035600	RRM_1	40030930	40033508	PABP	40027768	40029287
Q9ULC6	+	HGNC18367	1	PADI1	PAD_N	17531713	17550181	PAD_M	17550185	17555286	PAD	17555458	17570726
Q9Y2J8	-	HGNC18341	1	PADI2	PAD_N	17429488	17445865	PAD_M	17413027	17429484	PAD	17395550	17411181
Q9ULW8	+	HGNC18337	1	PADI3	PAD_N	17575633	17588693	PAD_M	17588697	17596894	PAD	17597389	17609562
Q9UM07	+	HGNC18368	1	PADI4	PAD_N	17634718	17660497	PAD_M	17660501	17668604	PAD	17668809	17690238
Q6TGC4	+	HGNC20449	1	PADI6	PAD_N	17698765	17701987	PAD_M	17701991	17715039	PAD	17715287	17727922
Q99487	-	HGNC8579	1	PAFAH2	PAF-AH_p_II	26288515	26317306
Q9NP74	+	HGNC15846	1	PALMD	Paralemmin	100133264	100155349
Q9NVE7	-	HGNC19366	1	PANK4	Fumble	2449994	2457944	DUF89	2440342	2447047
Q9BXP8	+	HGNC14615	1	PAPPA2	Laminin_G_3	176526266	176564051	Notch	176564487	176564579	Peptidase_M43	176640119	176661323	Sushi	176738809	176740164	Sushi	176740174	176758999
Q6TCH4	-	HGNC30132	1	PAQR6	HlyIII	156213891	156215392
Q86WK9	-	HGNC23146	1	PAQR7	HlyIII	26189460	26190134
Q99497	+	HGNC16369	1	PARK7	DJ-1_PfpI	8022855	8045057
P09874	-	HGNC270	1	PARP1	zf-PARP	226589933	226595596	zf-PARP	226578130	226579955	PADR1	226573222	226573377	BRCT	226567779	226570742	WGR	226564850	226566930	PARP_reg	226555204	226562009	PARP	226549184	226555197
Q7L3T8	-	HGNC30563	1	PARS2	tRNA-synt_2b	55223769	55224410	HGTP_anticodon	55223427	55223723
P23759	+	HGNC8621	1	PAX7	PAX	18960811	18962762	Homeobox	19018313	19027182	Pax7	19029668	19029790
P40424	+	HGNC8632	1	PBX1	PBC	164529177	164769121	Homeobox	164769125	164781268
A6NKB5	-	HGNC8736	1	PCNXL2	Pecanex_C	233134921	233150507
Q8NBP7	+	HGNC20001	1	PCSK9	Inhibitor_I9	55509537	55512252	Peptidase_S8	55517956	55523833
P20941	-	HGNC8759	1	PDC	Phosducin	186413113	186418590
Q07343	+	HGNC8781	1	PDE4B	PDEase_I	66829183	66838088
Q5VU43	-	HGNC15580	1	PDE4DIP	Cnn_1N	144952679	144994718	DUF1220	144874732	144876010
Q8N165	+	HGNC18981	1	PDIK1L	Pkinase	26440821	26449020
Q86YL7	+	HGNC29602	1	PDPN	Podoplanin	13910301	13936935
Q5T2W1	+	HGNC8821	1	PDZK1	PDZ	145747068	145748388	PDZ	145748536	145753993	PDZ	145754081	145756583	PDZ	145761319	145762188
Q13113	-	HGNC16887	1	PDZK1IP1	MAP17	47649645	47655603
Q15121	+	HGNC8822	1	PEA15	DED	160181344	160182979
Q5VY43	+	HGNC33631	1	PEAR1	hEGF	156876115	156876153	hEGF	156877809	156877923	Laminin_EGF	156877972	156878103	hEGF	156878595	156878719	hEGF	156879873	156880036	Laminin_EGF	156880448	156882088	hEGF	156882122	156882160
Q9UBV8	-	HGNC30009	1	PEF1	EF-hand_7	32098180	32098909	EF-hand_6	32096414	32098167
P56645	+	HGNC8847	1	PER3	PAS_3	7861229	7863894	Period_C	7890101	7902767
O60683	-	HGNC8851	1	PEX10	Pex2_Pex12	2338265	2343889	zf-C3HC4_3	2337949	2338189
O96011	+	HGNC8853	1	PEX11B	PEX11	145516401	145522892
O75381	+	HGNC8856	1	PEX14	Pex14_N	10555367	10683096
P40855	-	HGNC9713	1	PEX19	Pex19	160249343	160252859
Q9UHV9	-	HGNC8867	1	PFDN2	Prefoldin_2	161070550	161087746
O60825	+	HGNC8873	1	PFKFB2	6PF2K	207228138	207240958	His_Phos_1	207240965	207244882
Q6P3X8	+	HGNC19399	1	PGBD2	DDE_Tnp_1_7	249211201	249212280
Q8N414	-	HGNC19405	1	PGBD5	DDE_Tnp_1_7	230468608	230561520
P52209	+	HGNC8891	1	PGD	NAD_binding_2	10459181	10471483	6PGD	10471493	10479761
Q96LB9	-	HGNC30014	1	PGLYRP3	Amidase_2	153275069	153279674	Amidase_2	153270476	153275023
Q96LB8	-	HGNC30015	1	PGLYRP4	Amidase_2	153313041	153317783	Amidase_2	153303287	153312992
P36871	+	HGNC8905	1	PGM1	PGM_PMM_I	64059199	64095677	PGM_PMM_II	64097348	64101934	PGM_PMM_III	64101947	64114303	PGM_PMM_IV	64117362	64125286
Q8IZ21	+	HGNC25793	1	PHACTR4	RPEL	28785769	28786793	RPEL	28807106	28817467	RPEL	28817510	28818218
Q8IXK0	-	HGNC3183	1	PHC2	PHC2_SAM_assoc	33794525	33795808	SAM_1	33790474	33794518
Q86YI8	+	HGNC22983	1	PHF13	PHD	6681494	6681634
O43175	+	HGNC8923	1	PHGDH	2-Hacid_dh	120254670	120283014	2-Hacid_dh_C	120266039	120279799
Q9UMS5	-	HGNC8939	1	PHTF1	Phtf-FEM1B_bdg	114269074	114301312
Q9UBF8	-	HGNC8984	1	PI4KB	PI3_PI4_kinase	151271447	151274429	PI3_PI4_kinase	151266509	151271476
Q9Y6X2	+	HGNC16861	1	PIAS3	PINIT	145578413	145580534	zf-MIZ	145581238	145581535
Q92535	-	HGNC8960	1	PIGC	GPI2	172410910	172411722
Q92643	-	HGNC8965	1	PIGK	Peptidase_C13	77620201	77676134
Q9H3S5	-	HGNC18858	1	PIGM	Mannosyl_trans	160000305	160001111
P01833	-	HGNC8968	1	PIGR	V-set	207112467	207112784	V-set	207110770	207111078	V-set	207110461	207110763	V-set	207108837	207109148	V-set	207107783	207108076
Q9NUD9	+	HGNC26031	1	PIGV	Mannosyl_trans2	27117328	27124332
O00750	-	HGNC8972	1	PIK3C2B	PI3K_rbd	204429701	204433676	PI3K_C2	204416688	204424984	PI3Ka	204412619	204416627	PI3_PI4_kinase	204402520	204410618	PX	204397315	204401389	C2	204394006	204396813
O00329	+	HGNC8977	1	PIK3CD	PI3K_p85B	9770607	9775778	PI3K_rbd	9776059	9777079	PI3K_C2	9777673	9780222	PI3Ka	9780693	9781915	PI3_PI4_kinase	9782384	9784970
Q92569	-	HGNC8981	1	PIK3R3	SH2	46532657	46546335	PI3K_P85_iSH2	46512245	46532590	SH2	46509434	46511704
Q9BXM7	+	HGNC14581	1	PINK1	Pkinase	20970996	20976965
Q99755	+	HGNC8994	1	PIP5K1A	PIP5K	151205030	151212496
Q9GZP4	+	HGNC25022	1	PITHD1	PITH	24105096	24112904
P30613	-	HGNC9020	1	PKLR	PK	155263089	155269918	PK_C	155260374	155263046
Q16513	+	HGNC9406	1	PKN2	HR1	89206767	89206955	HR1	89225964	89236142	HR1	89237133	89237432	Pkinase	89273246	89298837	Pkinase_C	89298985	89299122
Q13835	+	HGNC9023	1	PKP1	Arm	201285805	201286801
P14555	-	HGNC9031	1	PLA2G2A	Phospholip_A2_1	20302238	20304993
Q5R387	-	HGNC9032	1	PLA2G2C	Phospholip_A2_1	20490534	20501629
Q9UNK4	-	HGNC9033	1	PLA2G2D	Phospholip_A2_1	20440651	20442946
Q9NZK7	-	HGNC13414	1	PLA2G2E	Phospholip_A2_1	20246844	20249227
Q9BZM2	+	HGNC30040	1	PLA2G2F	Phospholip_A2_1	20465984	20471151
P47712	+	HGNC9035	1	PLA2G4A	C2	186839585	186863334	PLA2_B	186901904	186948511
P39877	+	HGNC9038	1	PLA2G5	Phospholip_A2_1	20412599	20417158
O75038	+	HGNC29037	1	PLCH2	PH_12	2408148	2411366	EF-hand_7	2411626	2415946	EF-hand_like	2415968	2418676	PI-PLC-X	2418683	2421207	PI-PLC-Y	2428086	2429041	C2	2430009	2431099
Q8N7P1	-	HGNC26879	1	PLD5	PLDc_3	242264060	242383291
Q9Y2H5	-	HGNC17053	1	PLEKHA6	PH	204230483	204237364
O94827	-	HGNC29105	1	PLEKHG5	RhoGEF	6530824	6533080
Q8IWE5	+	HGNC29131	1	PLEKHM2	RUN	16042801	16046234	PH	16057132	16058537
Q53GL0	+	HGNC24310	1	PLEKHO1	PH	150123135	150129182
Q9H4B4	+	HGNC2154	1	PLK3	Pkinase	45266319	45268819	POLO_box	45270079	45270412	POLO_box	45271004	45271317
Q02809	+	HGNC9081	1	PLOD1	2OG-FeII_Oxy	12032935	12034862
O75051	-	HGNC9100	1	PLXNA2	Sema	208315712	208391113	PSI	208272241	208276570	TIG	208227768	208252618	TIG	208224650	208225804	TIG	208219300	208224640	TIG	208218042	208219290	Plexin_cytopl	208200680	208216491
Q6GTS8	-	HGNC26518	1	PM20D1	Peptidase_M20	205797792	205814580	M20_dimer	205801846	205812906
Q6P1K2	+	HGNC9112	1	PMF1	Nnf1	156195397	156206220
Q15126	-	HGNC9141	1	PMVK	P-mevalo_kinase	154898899	154909121
Q9NPJ4	+	HGNC23158	1	PNRC2	PNRC	24288218	24288358
Q7Z5L7	+	HGNC23174	1	PODN	LRR_5	53535765	53542886	LRR_8	53542905	53543431	LRR_8	53544233	53544421	LRR_8	53544446	53544634	LRR_8	53544659	53547653
Q9P215	+	HGNC18800	1	POGK	KRAB	166815858	166816732	BrkDBD	166818399	166818557	HTH_Tnp_Tc5	166818591	166818785	DDE_1	166818999	166819517
Q7Z3K3	-	HGNC18801	1	POGZ	HTH_Tnp_Tc5	151378258	151378440	DDE_1	151377604	151378050
Q9BUI4	-	HGNC30076	1	POLR3C	HTH_9	145608641	145610565	RNA_pol_Rpc82	145598256	145608409
Q9BT43	-	HGNC28466	1	POLR3GL	RNA_pol_3_Rpc31	145456642	145460221
Q8WZA1	-	HGNC19139	1	POMGNT1	ILEI	46660315	46661718	GNT-I	46655188	46659947
P14859	+	HGNC9212	1	POU2F1	Pou	167358858	167365597	Homeobox	167367239	167368461
Q03052	-	HGNC9214	1	POU3F1	Pou	38511452	38511667	Homeobox	38511227	38511397
O14495	-	HGNC9229	1	PPAP2B	PAP2	56962321	56990138
Q9HAB8	+	HGNC25686	1	PPCS	DFP	42922330	42922524	DFP	42922639	42925498
O75335	+	HGNC9248	1	PPFIA4	SAM_1	203025281	203025972	SAM_1	203028347	203029404	SAM_2	203029471	203033003
Q9Y536	+	HGNC24369	1	PPIAL4A	Pro_isomerase	149553096	149553566
Q9Y536	+	HGNC33995	1	PPIAL4C	Pro_isomerase	149553096	149553566
F5H284	-	HGNC33998	1	PPIAL4D	Pro_isomerase	148201972	148202442
A2BFH1	-	HGNC33996	1	PPIAL4G	Pro_isomerase	143767359	143767829
Q9UNP9	+	HGNC9258	1	PPIE	RRM_1	40204594	40208920	Pro_isomerase	40211089	40228248
O43447	+	HGNC14651	1	PPIH	Pro_isomerase	43124157	43133084
Q5JR12	-	HGNC20785	1	PPM1J	PP2C	113253988	113255469	PP2C	113252892	113253670
P50336	+	HGNC9280	1	PPOX	Amino_oxidase	161136671	161140945
Q12972	+	HGNC9296	1	PPP1R8	FHA	28165237	28167607
O60237	+	HGNC7619	1	PPP1R12B	Ank_4	202318157	202385923	Ank	202385990	202391790	Ank	202394798	202396210	PRKG1_interact	202532039	202549685
Q5SWA1	-	HGNC14951	1	PPP1R15B	CReP_N	204379309	204380538	PP1c_bdg	204375264	204379302
Q15172	+	HGNC9309	1	PPP2R5A	B56	212459618	212534037
P50897	-	HGNC9325	1	PPT1	Palm_thioest	40539735	40562828
Q6ZP29	+	HGNC26001	1	PQLC2	PQ-loop	19644280	19651256	PQ-loop	19653046	19653831
Q92733	+	HGNC9343	1	PRCC	PRCC	156756706	156770249
Q13029	+	HGNC9347	1	PRDM2	SET	14057606	14075894	zf-C2H2_6	14105734	14105814	zf-C2H2_6	14108650	14108715
Q9HAZ2	+	HGNC14000	1	PRDM16	zf-C2H2_6	3319363	3319431	zf-C2H2	3321427	3322106	zf-C2H2	3334551	3335288	zf-C2H2	3335304	3342211
Q06830	-	HGNC9352	1	PRDX1	AhpC-TSA	45980266	45984693	1-cysPrx_C	45977009	45980208
P30041	+	HGNC16753	1	PRDX6	AhpC-TSA	173446555	173455432	1-cysPrx_C	173455490	173456942
P51888	+	HGNC9357	1	PRELP	LRR_8	203452616	203452798	LRR_8	203452823	203453011	LRR_8	203453036	203453221	LRR_1	203453246	203455883
Q92954	+	HGNC9364	1	PRG4	Somatomedin_B	186269228	186270725	Somatomedin_B	186270726	186273241	Hemopexin	186280249	186280655
P54646	+	HGNC9377	1	PRKAA2	Pkinase	57111106	57169659	AdenylateSensor	57170056	57173212
O43741	-	HGNC9379	1	PRKAB2	AMPK1_CBM	146638131	146639439	AMPKBI	146631149	146634089
P22694	+	HGNC9381	1	PRKACB	Pkinase	84610174	84668476
Q05513	+	HGNC9412	1	PRKCZ	PB1	1982112	1990990	C1_1	2066757	2075777	Pkinase	2082295	2106731
Q96LA8	+	HGNC18241	1	PRMT6	PrmA	107599539	107599889
P58294	+	HGNC18454	1	PROK1	Prokineticin	110993839	110998946
Q92786	+	HGNC9459	1	PROX1	HPD	214178517	214209159
O43395	+	HGNC17348	1	PRPF3	PWI	150297425	150298297	PRP3	150307599	150316946	DUF1115	150317013	150325422
Q8NAV1	+	HGNC25930	1	PRPF38A	PRP38	52870449	52878212	PRP38_assoc	52878222	52880470
Q5VTL8	+	HGNC25512	1	PRPF38B	PRP38	109235352	109241360
Q9Y520	+	HGNC24903	1	PRRC2C	BAT2_N	171481228	171484958
P54821	+	HGNC9142	1	PRRX1	Homeobox	170688908	170695396	OAR	170705244	170705297
A1L453	+	HGNC29625	1	PRSS38	Trypsin	228003820	228033792
Q86TP1	+	HGNC13420	1	PRUNE	DHH	150990303	150998013	DHHA2	150998116	151006422
P49810	+	HGNC9509	1	PSEN2	Presenilin	227071508	227079472	Presenilin	227079056	227083247
P28066	-	HGNC9534	1	PSMA5	Proteasome_A_N	109964487	109968930	Proteasome	109944700	109964486
P49721	-	HGNC9539	1	PSMB2	Proteasome	36068924	36107026
P28070	+	HGNC9541	1	PSMB4	Proteasome	151372464	151374035
P55036	+	HGNC9561	1	PSMD4	VWA_2	151227271	151237980	UIM	151238062	151238506	UIM	151238864	151238914
Q6PGN9	-	HGNC24472	1	PSRC1	GTSE1_N	109824393	109825194
P25105	-	HGNC9582	1	PTAFR	7tm_1	28476653	28477438
Q9UKA9	+	HGNC17662	1	PTBP2	RRM_5	97235366	97236368	RRM_5	97243297	97250671	RRM_5	97271978	97278311	RRM_6	97278450	97278907
Q9Y6C5	-	HGNC9586	1	PTCH2	Sterol-sensing	45293862	45294947	Patched	45288749	45292428
Q9P2K9	+	HGNC29251	1	PTCHD2	Patched	11562857	11580892	MMPL	11594570	11596641
P43115	-	HGNC9595	1	PTGER3	7tm_1	71478026	71513067
P43088	+	HGNC9600	1	PTGFR	7tm_1	78958555	79002204
Q9P2B2	+	HGNC9601	1	PTGFRN	V-set	117484363	117487305	V-set	117491825	117492151
P35354	-	HGNC9605	1	PTGS2	EGF	186648463	186648561	An_peroxidase	186643619	186646818
Q12974	-	HGNC9635	1	PTP4A2	Y_phosphatase	32374512	32384638
P35236	-	HGNC9659	1	PTPN7	Y_phosphatase	202121812	202128490
Q15678	-	HGNC9647	1	PTPN14	FERM_N	214625227	214638073	FERM_M	214575036	214625181	FERM_C	214567039	214571343	Y_phosphatase	214531291	214549671
Q9Y2R2	-	HGNC9652	1	PTPN22	Y_phosphatase	114391212	114402009
P08575	+	HGNC9666	1	PTPRC	PTP_N	198608411	198661492	CD45	198675880	198676056	fn3	198678953	198685914	fn3	198685969	198691574	Y_phosphatase	198701477	198713212	Y_phosphatase	198717286	198725064
P10586	+	HGNC9670	1	PTPRF	I-set	44019168	44019605	I-set	44035284	44044587	I-set	44054416	44054667	fn3	44056651	44056896	fn3	44056936	44057193	fn3	44057488	44058241	fn3	44063424	44063693	fn3	44064399	44069173	fn3	44069290	44069532	fn3	44069572	44069823	Y_phosphatase	44083167	44085130	Y_phosphatase	44085408	44087641
Q92729	+	HGNC9683	1	PTPRU	MAM	29581792	29585965	fn3	29587130	29587384	fn3	29605538	29606141	Y_phosphatase	29631325	29642549	Y_phosphatase	29644323	29652146
Q14671	-	HGNC14957	1	PUM1	PUF	31425155	31426609	PUF	31423081	31425151	PUF	31418324	31423071	PUF	31418216	31418320	PUF	31414886	31418212	PUF	31414053	31414882	PUF	31409642	31414049	PUF	31409501	31409596
Q8N0Z8	+	HGNC26914	1	PUSL1	PseudoU_synth_1	1244069	1244882	PseudoU_synth_1	1245089	1246444
Q96NY8	-	HGNC19688	1	PVRL4	V-set	161049380	161049715	C2-set_2	161047270	161047521	Ig_3	161044443	161046223
Q96C36	-	HGNC30262	1	PYCR2	F420_oxidored	226109927	226111806	P5CR_dimer	226108316	226109610
Q9BRQ0	-	HGNC30257	1	PYGO2	PHD	154931320	154931490
Q6K0P9	+	HGNC28894	1	PYHIN1	PYRIN	158906722	158906949	HIN	158911818	158913714
O00391	+	HGNC9756	1	QSOX1	Thioredoxin	180124166	180145091	Evr1_Alr	180159640	180165440
P20337	-	HGNC9778	1	RAB3B	Ras	52385703	52442719
Q9H2M9	-	HGNC17168	1	RAB3GAP2	RAB3GAP2_N	220363855	220387281	RAB3GAP2_C	220324664	220355606
P20338	+	HGNC9781	1	RAB4A	Ras	229422244	229434806
Q96AH8	-	HGNC30513	1	RAB7B	Ras	113795772	113804723
P51153	-	HGNC9762	1	RAB13	Ras	153954887	153958684
P57735	+	HGNC18238	1	RAB25	Ras	156031231	156039961
O14966	-	HGNC9789	1	RAB29	Ras	205739556	205744059
Q8N4Z0	+	HGNC28702	1	RAB42	Ras	28919024	28919221
P53611	+	HGNC9796	1	RABGGTB	Prenyltrans	76254928	76255654	Prenyltrans	76255667	76257148	Prenyltrans	76257161	76257901	Prenyltrans	76257914	76259822	Prenyltrans	76259835	76260245
P47224	-	HGNC9797	1	RABIF	Mss4	202850111	202858147
Q92698	+	HGNC9826	1	RAD54L	SNF2_N	46726272	46739040	Helicase_C	46739137	46740353
Q86X27	+	HGNC30279	1	RALGPS2	RasGEF	178753649	178848107	PH	178863100	178875987
P62834	+	HGNC9855	1	RAP1A	Ras	112233995	112251803
P47736	-	HGNC9858	1	RAP1GAP	GoLoco	21976282	21978314	Rap_GAP	21936630	21940158
Q9UJF2	+	HGNC9874	1	RASAL2	C2	178359282	178408689	RasGAP	178411924	178412151	RasGAP	178412122	178414727	DUF3498	178421603	178433490
Q8WWW0	+	HGNC17609	1	RASSF5	C1_1	206681302	206711562	RA	206757848	206758615	Nore1-SARAH	206760164	206760283
Q9HCJ3	+	HGNC25577	1	RAVER2	RRM_1	65211066	65243391	RRM_1	65243419	65243628	RRM_1	65243686	65247185
Q09028	+	HGNC9887	1	RBBP4	CAF1C_H4-bd	33117553	33123127	WD40	33134348	33134590	WD40	33134857	33135104	WD40	33135120	33138122
Q15291	-	HGNC9888	1	RBBP5	WD40	205074232	205083962
Q9Y5S9	+	HGNC9905	1	RBM8A	RRM_1	145508492	145509008
Q96T37	+	HGNC14959	1	RBM15	RRM_1	110882562	110882765	RRM_1	110883153	110883362	RRM_6	110883396	110883566	SPOC	110884389	110884799
P42696	-	HGNC28965	1	RBM34	RRM_1	235301488	235318233	RRM_1	235295246	235299372
Q96E39	-	HGNC25073	1	RBMXL1	RRM_1	89449269	89449481	RBM1CTR	89448858	89448992
Q96R05	+	HGNC30316	1	RBP7	Lipocalin	10057332	10075887
Q5TC82	-	HGNC29434	1	RC3H1	zf-CCCH	173939656	173939736
Q9UKA8	+	HGNC3042	1	RCAN3	Calcipressin	24841028	24861719
P18754	+	HGNC1913	1	RCC1	RCC1	28857061	28858394	RCC1	28858401	28858730	RCC1	28861595	28862393	RCC1	28862400	28862790	RCC1	28862797	28863308	RCC1	28863315	28864402
Q9P258	-	HGNC30297	1	RCC2	RCC1	17749204	17752057	RCC1	17747261	17748784	RCC1	17740204	17747254	RCC1	17740042	17740194
Q9P2K3	+	HGNC25594	1	RCOR3	ELM2	211432903	211433058	Myb_DNA-binding	211444606	211449637	Myb_DNA-binding	211462658	211469074
Q6JBY9	+	HGNC28310	1	RCSD1	CAP-ZIP_m	167659313	167666494	RCSD	167666546	167666848
Q7Z3Z2	-	HGNC19689	1	RD3	RD3	211652566	211654744
Q9BYZ8	-	HGNC22977	1	REG4	Lectin_C	120337249	120345716
P00797	-	HGNC9958	1	REN	A1_Propeptide	204131221	204135324	Asp	204124149	204130539
O15258	+	HGNC30309	1	RER1	Rer1	2327287	2334527
Q9P2R6	-	HGNC9965	1	RERE	BAH	8568715	8716049	ELM2	8555218	8568708	GATA	8424229	8424826	Atrophin-1	8415152	8424153
Q8NHY2	-	HGNC17440	1	RFWD2	zf-C3HC4	176145091	176175708	WD40	175996810	176012868	WD40	175957517	175958579	WD40	175956210	175957507
P48382	-	HGNC9986	1	RFX5	RFX_DNA_binding	151316723	151317291	RFX5_DNA_bdg	151314670	151315326
Q9NZL6	+	HGNC30281	1	RGL1	RasGEF_N	183775578	183835199	RasGEF	183849922	183869295	RA	183885668	183891451
Q08116	+	HGNC9991	1	RGS1	RGS	192545938	192548419
P41220	+	HGNC9998	1	RGS2	RGS	192779534	192780684
P49798	+	HGNC10000	1	RGS4	RGS	163039167	163043274
O15539	-	HGNC10001	1	RGS5	RGS	163117140	163131731
P49802	-	HGNC10003	1	RGS7	DEP	241099902	241262022	G-gamma	240976925	240979645	RGS	240966221	240975302
P57771	-	HGNC16810	1	RGS8	RGS	182615953	182636022
O14921	+	HGNC9995	1	RGS13	RGS	192617090	192628620
O15492	-	HGNC9997	1	RGS16	RGS	182569495	182571581
Q9NS28	+	HGNC14261	1	RGS18	RGS	192129542	192153579
Q2M5E4	+	HGNC26839	1	RGS21	RGS	192316492	192335203
A5PLK6	+	HGNC18636	1	RGSL1	RGS	182496715	182499946
Q9NX52	-	HGNC16083	1	RHBDL2	Rhomboid	39352280	39381288
Q9H310	+	HGNC14572	1	RHBG	Ammonium_transp	156339113	156354343
P18577	-	HGNC10008	1	RHCE	Ammonium_transp	25696969	25747234
Q02161	+	HGNC10009	1	RHD	Ammonium_transp	25599081	25648444
P08134	-	HGNC669	1	RHOC	Ras	113244203	113246402
Q7L0Q8	+	HGNC17794	1	RHOU	Ras	228871640	228879379
A6NNX1	+	HGNC26686	1	RIIAD1	RIIa	151694607	151701261
Q8IXN7	+	HGNC28725	1	RIMKLA	RimK	42865233	42880366
Q9UJD0	-	HGNC21292	1	RIMS3	C2	41092287	41095011
Q92963	-	HGNC10023	1	RIT1	Ras	155870337	155880536
Q05823	-	HGNC10050	1	RNASEL	Ank	182555674	182555769	Ank	182555341	182555442	Pkinase	182551390	182554836	Ribonuc_2-5A	182544601	182550490
Q99496	+	HGNC10061	1	RNF2	zf-C3HC4	185060774	185062214	RAWUL	185067439	185069412
Q9Y3C5	+	HGNC10056	1	RNF11	zf-RING_2	51735793	51736949
Q6ZMZ0	-	HGNC26886	1	RNF19B	IBR	33415257	33429730	IBR	33412152	33415193
Q9Y4L5	+	HGNC18154	1	RNF115	zf-RING_2	145686984	145688112
Q5TA31	+	HGNC27146	1	RNF187	zf-C3HC4	228675223	228675345
Q6ZRF8	+	HGNC32947	1	RNF207	zf-C3HC4	6266668	6266784	zf-B_box	6267524	6269051
Q5VTB9	+	HGNC25552	1	RNF220	RNF220	45079860	45101722	RNF220	45101243	45110914	zf-C3HC4_2	45115427	45116402
E7ERA6	-	HGNC40020	1	RNF223	zf-RING_2	1007640	1007801
Q96LT9	+	HGNC18666	1	RNPC3	RRM_1	104068777	104076408	RRM_1	104088926	104093692
Q9H4A4	+	HGNC10078	1	RNPEP	Peptidase_M1	201951885	201970550	Leuk-A4-hydro_C	201972439	201974826
Q01973	+	HGNC10256	1	ROR1	I-set	64515371	64515643	Fz	64603077	64606051	Kringle	64608096	64608332	Pkinase_Tyr	64643141	64643962
P51449	-	HGNC10260	1	RORC	zf-C4	151789143	151789741	Hormone_recep	151780043	151787057
P15927	-	HGNC10290	1	RPA2	RPA_C	28218724	28223568
Q8IXW5	+	HGNC25791	1	RPAP2	RPAP2_Rtr1	92769537	92772801
Q16518	-	HGNC10294	1	RPE65	RPE65	68895464	68914357
Q9H9Y2	+	HGNC30350	1	RPF1	Brix	84955388	84961999
P46777	+	HGNC10360	1	RPL5	Ribosomal_L18p	93299104	93301941	Ribosomal_L18_c	93303059	93307377
P62913	+	HGNC10301	1	RPL11	Ribosomal_L5	24019120	24020328	Ribosomal_L5_C	24020338	24022386
P35268	-	HGNC10315	1	RPL22	Ribosomal_L22e	6246746	6257782
Q5VT52	+	HGNC29039	1	RPRD2	CTD_bind	150390086	150413462	CREPT	150416736	150429892
Q15418	+	HGNC10430	1	RPS6KA1	Pkinase	26873406	26883164	Pkinase_C	26883504	26885338	Pkinase	26887226	26899765
Q96S38	+	HGNC10439	1	RPS6KC1	PX	213224774	213290661	MIT	213303115	213341280	Pkinase	213415439	213445944
P62241	+	HGNC10441	1	RPS8	Ribosomal_S8e	45241269	45244300
P42677	+	HGNC10416	1	RPS27	Ribosomal_S27e	153963666	153964560
Q6XPR3	-	HGNC26809	1	RPTN	S_100	152130227	152130355
Q9HB90	-	HGNC19902	1	RRAGC	Gtr1_RagA	39317318	39325131
Q96FB5	+	HGNC24273	1	RRNAD1	Methyltransf_32	156702233	156704043
Q9Y3B9	+	HGNC24255	1	RRP15	Rrp15p	218475770	218480914
Q9BU20	-	HGNC28127	1	RSG1	Ras	16558698	16560202
Q2MKA7	-	HGNC21679	1	RSPO1	Furin-like_2	38079553	38082323
Q9BUV0	-	HGNC25234	1	RSRP1	RSRP	25569082	25573453
O00442	+	HGNC17981	1	RTCA	RTC	100731965	100752735	RTC_insert	100740420	100750806
Q13761	-	HGNC10473	1	RUNX3	Runt	25233900	25256196	RunxI	25228615	25228914
Q9BVN2	+	HGNC17153	1	RUSC1	RUN	155295161	155296504	SH3_9	155300204	155300350
Q9Y3V2	+	HGNC21393	1	RWDD3	RWD	95699787	95710014
Q8TDU9	+	HGNC14666	1	RXFP4	7tm_1	155911666	155912427
P48443	-	HGNC10479	1	RXRG	Nuc_recep-AF1	165389146	165398179	zf-C4	165386281	165389139	Hormone_recep	165370568	165380205
Q92736	+	HGNC10484	1	RYR2	Ins145_P3_rec	237205846	237550673	MIR	237550680	237608748	RYDR_ITPR	237617758	237656370	SPRY	237659863	237666613	RyR	237666776	237693760	RyR	237711750	237713975	SPRY	237729950	237753154	SPRY	237755151	237765408	RYDR_ITPR	237791307	237802382	RyR	237819256	237824184	RyR	237829836	237838031	RIH_assoc	237934118	237942034	RR_TM4-6	237948009	237957181	Ion_trans	237965196	237991724
P21453	+	HGNC3165	1	S1PR1	7tm_1	101704724	101705473
P23297	+	HGNC10486	1	S100A1	S_100	153603010	153603138
P29034	-	HGNC10492	1	S100A2	S_100	153534064	153536334
P33764	-	HGNC10493	1	S100A3	S_100	153520823	153520948
P26447	-	HGNC10494	1	S100A4	S_100	153517129	153517257
P33763	-	HGNC10495	1	S100A5	S_100	153512538	153512654
P06703	-	HGNC10496	1	S100A6	S_100	153507686	153507802
P31151	-	HGNC10497	1	S100A7	S_100	153431354	153431470
Q86SG5	+	HGNC21657	1	S100A7A	S_100	153390577	153390693
P05109	-	HGNC10498	1	S100A8	S_100	153362870	153362998
P06702	+	HGNC10499	1	S100A9	S_100	153330781	153330909
P60903	-	HGNC10487	1	S100A10	S_100	151958574	151958693
P31949	-	HGNC10488	1	S100A11	S_100	152006123	152006251
P80511	-	HGNC10489	1	S100A12	S_100	153346930	153347058
Q99584	-	HGNC10490	1	S100A13	S_100	153598795	153598923
Q9HCY8	-	HGNC18901	1	S100A14	S_100	153587713	153587835
Q96FQ6	-	HGNC20441	1	S100A16	S_100	153580474	153580605
Q96BU1	+	HGNC25768	1	S100PBP	S100PBPR	33291761	33321618
Q96NU1	+	HGNC28706	1	SAMD11	SAM_2	878686	879296
Q5VXD3	+	HGNC24582	1	SAMD13	SAM_1	84791351	84815415
P49591	+	HGNC10537	1	SARS	Seryl_tRNA_N	109756618	109772086	tRNA-synt_2b	109774403	109779940
Q6UVJ0	-	HGNC25403	1	SASS6	SAS-6_N	100586993	100588841
O14828	-	HGNC10565	1	SCAMP3	SCAMP	155226186	155228739
Q8NBX0	+	HGNC24275	1	SCCPDH	Sacchrp_dh_NADP	246887752	246903536
Q96GD3	-	HGNC19003	1	SCMH1	MBT	41582674	41608747	MBT	41578958	41579158	DUF3588	41512148	41536269	SAM_1	41493880	41494341
Q9BWG6	+	HGNC23136	1	SCNM1	zf-SCNM1	151139417	151139497	SCNM1_acidic	151140768	151141552
P51172	+	HGNC10601	1	SCNN1D	ASC	1216900	1223402
P22307	+	HGNC10606	1	SCP2	Thiolase_N	53393108	53443934	Thiolase_C	53446077	53480683	SCP2	53493714	53516349
Q8IZE3	-	HGNC19285	1	SCYL3	Pkinase	169838070	169857905
O75056	-	HGNC10660	1	SDC3	Syndecan	31346066	31347173
Q86SQ7	+	HGNC10671	1	SDCCAG8	CCCAP	243419491	243663063
Q6IQ49	-	HGNC26643	1	SDE2	Telomere_Sde2	226180120	226183077	Telomere_Sde2_2	226173026	226173205
Q9BRK5	-	HGNC24188	1	SDF4	EF-hand_8	1158699	1159334	EF-hand_5	1153059	1153902
P21912	-	HGNC10681	1	SDHB	Fer2_3	17354339	17371334	Fer4_17	17345444	17350556
Q99643	+	HGNC10682	1	SDHC	Sdh_cyt	161298247	161332211
Q96JE7	-	HGNC30301	1	SEC16B	Sec16	177927974	177930026	Sec16_C	177908894	177927298
O75396	+	HGNC10700	1	SEC22B	Longin	145103941	145112377	Synaptobrevin	145112417	145115886
P16581	-	HGNC10718	1	SELE	Lectin_C	169701756	169702091	EGF	169700985	169701077	Sushi	169699576	169699749	Sushi	169698632	169698805	Sushi	169698330	169698506	Sushi	169697202	169697378	Sushi	169696883	169697059	Sushi	169696493	169696657
Q13228	-	HGNC10719	1	SELENBP1	SBP56	151337147	151342359
P14151	-	HGNC10720	1	SELL	Lectin_C	169677597	169677932	Sushi	169673751	169676512	Sushi	169672438	169673738
P16109	-	HGNC10721	1	SELP	Lectin_C	169586266	169586601	Sushi	169582170	169582343	Sushi	169581458	169581631	Sushi	169580733	169580906	Sushi	169578745	169578918	Sushi	169576190	169576363	Sushi	169572267	169572440	Sushi	169566232	169566405	Sushi	169565166	169565339	Sushi	169563933	169564106
Q9H3S1	+	HGNC10729	1	SEMA4A	Sema	156126261	156144722	PSI	156144928	156145398
Q9H3T2	-	HGNC10740	1	SEMA6C	Sema	151107781	151112482
Q8NC51	-	HGNC17860	1	SERBP1	IHABP4_N	67891825	67895970	HABP4_PAI-RBP1	67885748	67890805
Q96SA4	+	HGNC23231	1	SERINC2	Serinc	31896546	31907037
P01008	-	HGNC775	1	SERPINC1	Serpin	173873038	173883845
Q9NUC0	+	HGNC25236	1	SERTAD4	SERTA	210414933	210415040
P58004	+	HGNC20746	1	SESN2	PA26	28595730	28607307
Q15047	+	HGNC10761	1	SETDB1	MBD	150923133	150923357	Pre-SET	150923397	150931708	SET	150931763	150936762
P0DME0	+	HGNC42937	1	SETSIP	NAP	92540381	92540824
Q12874	-	HGNC10767	1	SF3A3	SF3a60_bindingd	38453247	38453327	SF3A3	38446326	38449923	Telomere_Sde2_2	38444417	38445165	DUF3449	38423863	38442593
Q15427	-	HGNC10771	1	SF3B4	RRM_1	149898718	149899177	RRM_1	149898454	149898669
P31947	+	HGNC10773	1	SFN	14-3-3	27189713	27190411
P23246	-	HGNC10774	1	SFPQ	RRM_1	35656524	35657063	RRM_1	35656193	35656496	NOPS	35654913	35656183
O95562	+	HGNC25140	1	SFT2D2	Got1	168200770	168211760
Q9BQI5	+	HGNC25412	1	SGIP1	muHD	67185024	67208772
O14796	-	HGNC30416	1	SH2D1B	SH2	162368817	162381793
Q9NP31	-	HGNC10821	1	SH2D2A	SH2	156783696	156784853
Q9H299	+	HGNC15568	1	SH3BGRL3	SH3BGR	26606650	26607611
Q7L8J4	-	HGNC29360	1	SH3BP5L	SH3BP5	249106443	249118974
A4FU49	+	HGNC26236	1	SH3D21	SH3_2	36772485	36773141
Q9Y371	+	HGNC10833	1	SH3GLB1	BAR	87170607	87200776	SH3_9	87207976	87208819
P29353	-	HGNC10840	1	SHC1	PID	154940175	154942518	SH2	154936356	154938182
Q9BZQ2	-	HGNC16788	1	SHCBP1L	Beta_helix	182869189	182874651
Q5VZ18	-	HGNC27004	1	SHE	SH2	154456699	154458536
Q96DD7	+	HGNC27139	1	SHISA4	Shisa	201858581	201860962
Q9BRV8	-	HGNC26119	1	SIKE1	DUF837	115316966	115323224
Q9P2F8	-	HGNC23800	1	SIPA1L2	Rap_GAP	232600987	232619648	SPAR_C	232538161	232564305
P12755	+	HGNC10896	1	SKI	Ski_Sno	2160455	2160778	c-SKI_SMAD_bind	2160854	2161138
Q13291	-	HGNC10903	1	SLAMF1	SLAM	160607020	160616734
Q96DU3	-	HGNC21392	1	SLAMF6	V-set	160465851	160466156	Ig_3	160460963	160461166
Q9NQ25	+	HGNC21394	1	SLAMF7	V-set	160718001	160718303
O00341	-	HGNC10945	1	SLC1A7	SDF	53554584	53608066
P11166	-	HGNC11005	1	SLC2A1	Sugar_tr	43392789	43408964
P22732	-	HGNC11010	1	SLC2A5	Sugar_tr	9097725	9118284
Q6PXP3	-	HGNC13445	1	SLC2A7	Sugar_tr	9063454	9085108
Q2M3M2	+	HGNC22146	1	SLC5A9	SSF	48690432	48705020
P48067	-	HGNC11056	1	SLC6A9	SNF	44463547	44476505
Q9H1V8	+	HGNC31399	1	SLC6A17	SNF	110709729	110740811
P19634	-	HGNC11071	1	SLC9A1	Na_H_Exchanger	27429773	27480512	NEXCaM_BD	27427703	27428900
Q5TAH2	-	HGNC28664	1	SLC9C2	Na_H_Exchanger	173523893	173570821	cNMP_binding	173478793	173490522
P53985	-	HGNC10922	1	SLC16A1	MFS_1	113459809	113471866	MFS_1	113456554	113460033
O15374	-	HGNC10925	1	SLC16A4	MFS_1	110919709	110931866	MFS_1	110906390	110921570
O60779	-	HGNC10938	1	SLC19A2	Folate_carrier	169435206	169454922
Q8IZD6	+	HGNC20301	1	SLC22A15	Sugar_tr	116534739	116609257
Q6NUK1	-	HGNC20662	1	SLC25A24	EF-hand_7	108728507	108742702	EF-hand_7	108703860	108728500	Mito_carr	108690981	108700184	Mito_carr	108681800	108690980	Mito_carr	108679283	108681784
Q9BSK2	+	HGNC29681	1	SLC25A33	Mito_carr	9599769	9630370	Mito_carr	9630374	9640183	Mito_carr	9640214	9642553
Q6PIV7	+	HGNC27653	1	SLC25A34	Mito_carr	16062984	16063271	Mito_carr	16063275	16064740	Mito_carr	16065095	16065886
Q96H78	+	HGNC29036	1	SLC25A44	Mito_carr	156169693	156169953	Mito_carr	156169951	156177690	Mito_carr	156177709	156180195
Q7LBE3	-	HGNC14469	1	SLC26A9	Sulfate_transp	205893599	205902126	STAS	205888024	205892679
Q5K4L6	+	HGNC10997	1	SLC27A3	AMP-binding	153748454	153751596	AMP-binding_C	153751618	153752331
Q9Y6M5	-	HGNC11012	1	SLC30A1	Cation_efflux	211749401	211751923
Q9BRI3	-	HGNC11013	1	SLC30A2	Cation_efflux	26369084	26371529
Q8NEW0	+	HGNC19306	1	SLC30A7	Cation_efflux	101362157	101427423
Q6XR72	-	HGNC25355	1	SLC30A10	Cation_efflux	220091633	220101751
Q9Y2D2	+	HGNC11023	1	SLC35A3	Nuc_sug_transp	100436093	100483297
Q9NTN3	-	HGNC20800	1	SLC35D1	TPT	67470106	67519581
P0CK97	-	HGNC20863	1	SLC35E2	TPT	1666263	1670779
P0CK96	-	HGNC33941	1	SLC35E2B	TPT	1597334	1607921
Q8IY50	+	HGNC23616	1	SLC35F3	EamA	234041420	234444907
Q9NY26	-	HGNC12876	1	SLC39A1	Zip	153932588	153935112
Q8IVJ1	-	HGNC19429	1	SLC41A1	MgtE	205767821	205770145	MgtE	205760711	205766066
Q8N4M1	+	HGNC28689	1	SLC44A3	Choline_transpo	95307657	95358028
Q8NCS7	-	HGNC28524	1	SLC44A5	Choline_transpo	75672384	75693410
Q9Y2W3	+	HGNC17939	1	SLC45A1	MFS_1	8384492	8390564
Q96JT2	-	HGNC8642	1	SLC45A3	MFS_1	205631225	205633732
Q9BRV3	+	HGNC30657	1	SLC50A1	MtN3_slv	155108412	155110039	MtN3_slv	155110133	155110730
Q499Z3	-	HGNC26313	1	SLFNL1	AlbA_2	41482938	41483602
Q8WU79	+	HGNC25082	1	SMAP2	ArfGap	40839829	40875486
Q9UPR3	-	HGNC24644	1	SMG5	EST1	156243218	156247783	EST1_DNA_bind	156236169	156243196	EST1_DNA_bind	156230292	156235715	PIN_4	156220705	156222802
Q92540	+	HGNC16792	1	SMG7	EST1	183485110	183497113	EST1_DNA_bind	183497117	183507573
B2RUZ4	+	HGNC44204	1	SMIM1	DUF4731	3691944	3692479
Q96EX1	-	HGNC25154	1	SMIM12	UPF0767	35321317	35321577
Q92485	+	HGNC21416	1	SMPDL3B	Metallophos	28261755	28282347
Q9NRG4	+	HGNC20982	1	SMYD2	SET	214454649	214503528	zf-MYND	214454751	214488137
Q9H7B4	-	HGNC15513	1	SMYD3	SET	246078924	246670476	zf-MYND	246498743	246670374
O95295	+	HGNC17145	1	SNAPIN	Snapin_Pallidin	153631286	153633696
Q8TAD8	-	HGNC30587	1	SNIP1	FHA	38003456	38005842
Q96DI7	-	HGNC30857	1	SNRNP40	WD40	31764842	31766170	WD40	31762220	31764829	WD40	31754334	31762210	WD40	31742073	31744327	WD40	31734460	31742051	WD40	31732933	31734450
P62304	+	HGNC11161	1	SNRPE	LSM	203831336	203839048
Q9UNH6	+	HGNC14971	1	SNX7	PX	99127369	99156708
Q96L92	+	HGNC20073	1	SNX27	PDZ	151584804	151611451	PX	151611533	151633332	RA	151634657	151641048
P35610	+	HGNC11177	1	SOAT1	MBOAT	179310176	179320561
Q99523	-	HGNC11186	1	SORT1	Sortilin-Vps10	109867638	109910045	Sortilin_C	109859495	109867634
Q9UN79	+	HGNC11192	1	SOX13	HMG_box	204092827	204093869
Q6Q759	-	HGNC26620	1	SPAG17	PapD-like	118506553	118514588
Q9NWH7	-	HGNC18309	1	SPATA6	SPATA6	48869512	48937649
Q96L03	+	HGNC25184	1	SPATA17	IQ	217822252	217824439	IQ	217824446	217824508	IQ	217842417	217856641
Q96T58	+	HGNC17575	1	SPEN	RRM_1	16174584	16199452	RRM_1	16235943	16237774	RRM_1	16242697	16245546	RRM_5	16245974	16248755	SPOC	16264322	16265817
Q6ZMY3	-	HGNC26338	1	SPOCD1	TFIIS_M	32262301	32265050	SPOC	32257867	32258964
P35321	+	HGNC11259	1	SPRR1A	Cornifin	152957755	152957925	Cornifin	152957881	152957967
P22528	+	HGNC11260	1	SPRR1B	Cornifin	153004870	153005043	Cornifin	153005014	153005082
P35326	-	HGNC11261	1	SPRR2A	SPRR2	153029004	153029207
P35325	-	HGNC11262	1	SPRR2B	SPRR2	153043108	153043311
P22532	-	HGNC11264	1	SPRR2D	SPRR2	153012615	153012818
P22531	-	HGNC11265	1	SPRR2E	SPRR2	153066020	153066223
Q96RM1	-	HGNC11266	1	SPRR2F	SPRR2	153085002	153085205
Q9BYE4	-	HGNC11267	1	SPRR2G	SPRR2	153122376	153122582
Q9UBC9	+	HGNC11268	1	SPRR3	Cornifin	152975545	152975763	Cornifin	152975695	152975997
Q96PI1	+	HGNC23173	1	SPRR4	Cornifin	152944421	152944600
Q9H040	+	HGNC25356	1	SPRTN	SprT-like	231474262	231487238
Q96BD6	+	HGNC30628	1	SPSB1	SPRY	9416239	9416634	SOCS_box	9427512	9427631
P02549	-	HGNC11272	1	SPTA1	Spectrin	158651379	158655004	Spectrin	158648216	158651375	Spectrin	158645938	158648212	Spectrin	158641914	158645934	Spectrin	158639290	158641910	Spectrin	158636270	158639286	Spectrin	158632582	158636266	Spectrin	158627380	158632578	Spectrin	158624499	158627376	SH3_1	158623167	158624489	Spectrin	158619671	158622387	Spectrin	158617363	158619667	Spectrin	158614992	158617359	Spectrin	158612714	158614988	Spectrin	158609719	158612710
O75044	+	HGNC19751	1	SRGAP2	FCH	206516290	206566164	RhoGAP	206613330	206626597	SH3_1	206628323	206632058
P0DJJ0	+	HGNC30584	1	SRGAP2C	FCH	206516290	206566164
P19623	-	HGNC11296	1	SRM	Spermine_synth	11115123	11119945
P49458	+	HGNC11304	1	SRP9	SRP9-21	225965652	225977019
Q8IYB3	+	HGNC16638	1	SRRM1	PWI	24973182	24975466
Q08170	-	HGNC10786	1	SRSF4	RRM_1	29486938	29508254	RRM_1	29481272	29485932
O75494	-	HGNC16713	1	SRSF10	RRM_1	24301491	24306711
Q05519	+	HGNC10782	1	SRSF11	RRM_1	70687422	70694219
Q9BWW4	-	HGNC15674	1	SSBP3	SSDP	54693969	54867568
P43308	-	HGNC11324	1	SSR2	TRAP_beta	155979339	155989951
Q9NP77	-	HGNC25016	1	SSU72	Ssu72	1477448	1509921
Q9Y2D8	-	HGNC16509	1	SSX2IP	ADIP	85130130	85136354
Q11203	+	HGNC10866	1	ST3GAL3	Glyco_transf_29	44290467	44386474
Q8NDV1	+	HGNC19343	1	ST6GALNAC3	Glyco_transf_29	76779598	77094470
Q9BVH7	+	HGNC19342	1	ST6GALNAC5	Glyco_transf_29	77334272	77528831
Q8TDW4	-	HGNC18441	1	ST7L	ST7	113068697	113161623
Q15468	-	HGNC10879	1	STIL	STIL_N	47746824	47770615
Q8N2I9	-	HGNC21373	1	STK40	Pkinase	36809480	36824420
P16949	-	HGNC6510	1	STMN1	Stathmin	26212318	26230298
Q5TH74	-	HGNC28070	1	STPG1	SHIPPO-rpt	24696249	24700203	SHIPPO-rpt	24687494	24696227	SHIPPO-rpt	24687374	24687472	SHIPPO-rpt	24685050	24687352
Q5VSL9	+	HGNC25916	1	STRIP1	N1221	110580528	110585835	DUF3402	110587662	110596474
O43752	-	HGNC11441	1	STX6	Syntaxin-6_N	180962552	180991796	SNARE	180945720	180957375
Q86Y82	+	HGNC11430	1	STX12	Syntaxin_2	28099903	28128296	SNARE	28144425	28148807
O00186	+	HGNC11446	1	STXBP3	Sec1	109294926	109351445
Q9UBS9	+	HGNC1240	1	SUCO	Sad1_UNC	172526466	172539212
Q5VX71	-	HGNC25470	1	SUSD4	Sushi	223465790	223465972	Sushi	223441847	223442014	Sushi	223437984	223438157	Sushi	223402548	223402727
Q7L0J3	-	HGNC20566	1	SV2A	Sugar_tr	149879685	149884950	Pentapeptide_4	149878334	149879600	MFS_1	149876577	149879257
Q5T5J6	+	HGNC16785	1	SWT1	PIN_4	185153404	185171846
Q15431	+	HGNC11487	1	SYCP1	SCP-1	115398167	115520231
Q5VT97	-	HGNC25841	1	SYDE2	RhoGAP	85630305	85647830
O95926	-	HGNC19824	1	SYF2	SYF2	25549774	25554716
Q9H7C4	-	HGNC28897	1	SYNC	Filament	33149671	33161196
Q5VXT5	+	HGNC27638	1	SYPL2	MARVEL	110009714	110022047
Q8N9I0	-	HGNC11510	1	SYT2	C2	202571038	202572131	C2	202565971	202569550
Q5T7P8	-	HGNC18638	1	SYT6	C2	114680131	114680457	C2	114640381	114646288
Q9BT88	+	HGNC19239	1	SYT11	C2	155838235	155838558	C2	155850345	155851245
Q8NB59	+	HGNC23143	1	SYT14	C2	210267912	210273644	C2	210273795	210334141
Q8IYJ3	+	HGNC15584	1	SYTL1	C2	27676556	27677434	C2	27677967	27680244
Q7Z422	+	HGNC30232	1	SZRD1	SUZ	16719787	16719942	SUZ-C	16721534	16721629
P09758	-	HGNC11530	1	TACSTD2	Thyroglobulin_1	59042393	59042602
Q96BN2	-	HGNC30631	1	TADA1	SAGA-Tad1	166831586	166845454	SAGA-Tad1	166829532	166831576
Q15573	-	HGNC11532	1	TAF1A	TAF1_subA	222742878	222761883	TAF1_subA	222732013	222737403
O75529	-	HGNC17304	1	TAF5L	TFIID_NTD2	229738328	229745918	WD40	229730703	229730819	WD40	229730577	229730696	WD40	229730451	229730567	WD40	229730325	229730441	WD40	229730199	229730315
Q16514	-	HGNC11545	1	TAF12	TFIID_20kDa	28931955	28944535
Q15543	-	HGNC11546	1	TAF13	TFIID-18kDa	109607162	109617626
P37802	-	HGNC11554	1	TAGLN2	CH	159889125	159890229	Calponin	159888595	159888669
P17542	-	HGNC11556	1	TAL1	HLH	47685667	47685825
Q13395	-	HGNC11568	1	TARBP1	SpoU_methylase	234527370	234529439
Q13148	+	HGNC11571	1	TARDBP	RRM_1	11076978	11078903	RRM_1	11080519	11082195
Q9BW92	+	HGNC30740	1	TARS2	TGS	150460448	150461539	tRNA_SAD	150464125	150469014	tRNA-synt_2b	150470165	150477198	HGTP_anticodon	150477404	150479501
Q7RTX1	+	HGNC14448	1	TAS1R1	ANF_receptor	6630997	6636585	NCD3G	6637013	6638753	7tm_3	6638841	6639560
Q8TE23	-	HGNC14905	1	TAS1R2	ANF_receptor	19175939	19184099	NCD3G	19166980	19168342	7tm_3	19166170	19166883
Q7RTX0	+	HGNC15661	1	TAS1R3	ANF_receptor	1267037	1268411	NCD3G	1268642	1268926	7tm_3	1268993	1269733
Q17R31	+	HGNC27010	1	TATDN3	TatD_DNase	212965288	212988474
Q15813	+	HGNC11582	1	TBCE	CAP_GLY	235543392	235577787	Ubiquitin_2	235605194	235612071
Q96SF7	-	HGNC11594	1	TBX15	T-box	119456751	119474317
O60806	+	HGNC11596	1	TBX19	T-box	168250455	168267012
O75764	-	HGNC11615	1	TCEA3	Med26	23744397	23745616	TFIIS_M	23713846	23724338	TFIIS_C	23710838	23713809
Q96MN5	+	HGNC26494	1	TCEANC2	Med26	54534510	54554355
Q14241	+	HGNC11620	1	TCEB3	Med26	24075520	24076427	Elongin_A	24080855	24082783
Q07283	-	HGNC11791	1	TCHH	S_100	152086418	152086546
Q5QJ38	-	HGNC31796	1	TCHHL1	S_100	152060481	152060609
Q8N7M0	+	HGNC26882	1	TCTEX1D1	Tctex-1	67241988	67243128
Q5JR98	-	HGNC32315	1	TCTEX1D4	Tctex-1	45271683	45271976
Q8NAT2	+	HGNC20614	1	TDRD5	OST-HTH	179561766	179561978	OST-HTH	179562753	179562959	OST-HTH	179587782	179600024	TUDOR	179604904	179609565
Q5VZ19	+	HGNC25316	1	TDRD10	RRM_1	154480922	154493886	TUDOR	154516518	154517424
Q9Y2W6	-	HGNC11713	1	TDRKH	KH_1	151752502	151754027	KH_1	151751473	151752471	TUDOR	151748308	151749054
Q5T9Z0	-	HGNC30233	1	TEDDM1	DUF716	182368966	182369331
Q9UIF3	+	HGNC11725	1	TEKT2	Tektin	36550571	36553688
Q96S53	-	HGNC11732	1	TESK2	Pkinase_Tyr	45811618	45923282
Q5T0J7	+	HGNC25366	1	TEX35	Tsc35	178482324	178491491
Q6PEX7	+	HGNC29589	1	TEX38	THEG4	47137643	47139122
Q6VUC0	+	HGNC30774	1	TFAP2E	TF_AP-2	36054014	36060196
Q9H5Q4	-	HGNC18559	1	TFB2M	RrnaAD	246704386	246729229
P61812	+	HGNC11768	1	TGFB2	TGFb_propeptide	218520101	218609325	TGF_beta	218609416	218614614
Q03167	-	HGNC11774	1	TGFBR3	Zona_pellucida	92174331	92185496
Q8WTV1	+	HGNC20855	1	THAP3	THAP	6685288	6688736
P49746	-	HGNC11787	1	THBS3	COMP	155172749	155173093	EGF_CA	155172078	155172613	EGF_CA	155171300	155171815	TSP_3	155170368	155170761	TSP_3	155169854	155170298	TSP_3	155169785	155169856	TSP_3	155168332	155169646	TSP_3	155168212	155168331	TSP_3	155167916	155168211	TSP_C	155165688	155167864
Q5T1C6	-	HGNC17947	1	THEM4	4HBT	151849489	151861693
Q8N1Q8	-	HGNC26755	1	THEM5	4HBT	151820226	151823532
Q5TEJ8	+	HGNC16839	1	THEMIS2	CABIT	28199134	28208564	CABIT	28208637	28209395
Q9Y2W1	+	HGNC22964	1	THRAP3	THRAP3_BCLAF1	36752198	36766556
P35590	+	HGNC11809	1	TIE1	ig	43770915	43772656	hEGF	43772899	43772937	ig	43774680	43775193	fn3	43777350	43777771	fn3	43777987	43778241	fn3	43778811	43779065	Pkinase_Tyr	43782975	43787362
Q99595	+	HGNC17315	1	TIMM17A	Tim17	201926416	201934634
Q9GZM7	+	HGNC19168	1	TINAGL1	Peptidase_C1	32050303	32052544
O75663	+	HGNC30231	1	TIPRL	TIP41	168153177	168168219
O60602	-	HGNC11851	1	TLR5	LRR_8	223285980	223286135	LRR_8	223285329	223285511	LRR_8	223284759	223284902	TIR	223283799	223284299
Q9BX74	-	HGNC24142	1	TM2D1	TM2	62160383	62166695
O75069	+	HGNC24239	1	TMCC2	Tmemb_cc2	205238186	205241213
Q9UM00	-	HGNC18188	1	TMCO1	DUF106	165712526	165738134
Q7Z6W1	+	HGNC23312	1	TMCO2	TMCCDC2	40713690	40717254
Q5TGY1	-	HGNC27393	1	TMCO4	DUF726	20009874	20073715
Q9Y3A6	-	HGNC24251	1	TMED5	EMP24_GP25L	93620250	93645696
Q9P0T7	-	HGNC18823	1	TMEM9	Tmemb_9	201104796	201120925
Q9GZU3	+	HGNC25510	1	TMEM39B	Tmp39	32541214	32568229
O95807	+	HGNC30590	1	TMEM50A	UPF0220	25666990	25687190
Q9NW97	+	HGNC25488	1	TMEM51	TMEM51	15541602	15546197
Q8NDY8	-	HGNC27916	1	TMEM52	TMEM52	1849398	1850505
Q6P2H8	-	HGNC26186	1	TMEM53	DUF829	45120251	45125922
Q969K7	-	HGNC24143	1	TMEM54	BCLP	33360477	33363884
Q96MV1	+	HGNC26477	1	TMEM56	TRAM_LAG1_CLN8	95609599	95657349
Q8N5G2	+	HGNC25572	1	TMEM57	Macoilin	25757593	25824948
Q9BXS4	-	HGNC1239	1	TMEM59	BSMAP	54502330	54513020
Q8N0U2	+	HGNC27296	1	TMEM61	TMEM61	55451791	55457761
O94886	-	HGNC29118	1	TMEM63A	RSN1_TM	226054306	226065132	PHM7_cyt	226050006	226050513	RSN1_7TM	226036705	226049954
Q5SWH9	+	HGNC28035	1	TMEM69	DUF3429	46159110	46159526
A0PJX8	+	HGNC32350	1	TMEM82	TMEM82	16069082	16073549
Q96AQ2	+	HGNC28275	1	TMEM125	TMEM125	43738445	43738777
Q9NRX6	+	HGNC30187	1	TMEM167B	DUF1242	109635529	109635639
Q69YZ2	-	HGNC33785	1	TMEM200B	DUF2371	29447893	29448288
Q5SNT2	+	HGNC33719	1	TMEM201	Ima1_N	9655970	9658590	DUF2448	9658648	9667621
Q9H813	-	HGNC25593	1	TMEM206	TMEM206	212548561	212587295
Q9H0R3	+	HGNC25363	1	TMEM222	DUF778	27648869	27660494	DUF778	27660471	27660767
Q8WY98	-	HGNC28837	1	TMEM234	TMEM234	32682498	32687604
Q5SV17	-	HGNC25186	1	TMEM240	TMEM240	1470741	1475725
Q9NZQ9	-	HGNC11874	1	TMOD4	Tropomodulin	151144801	151147341
Q6P589	+	HGNC26277	1	TNFAIP8L2	DUF758	151131183	151131719
P20333	+	HGNC11917	1	TNFRSF1B	TNFR_c6	12248892	12251060	TNFR_c6	12251067	12251877	TNFR_c6	12251881	12252513
P43489	-	HGNC11918	1	TNFRSF4	TNFR_c6	1149118	1149416	TNFR_c6	1148420	1149111	TNFR_c6	1147457	1148072
P28908	+	HGNC11923	1	TNFRSF8	TNFR_c6	12164489	12169648
Q07011	-	HGNC11924	1	TNFRSF9	TNFR_c6	7998340	7998846
Q92956	+	HGNC11912	1	TNFRSF14	TNFR_c6	2490680	2490805
Q93038	-	HGNC11910	1	TNFRSF25	TNFR_c6	6524729	6525225	Death	6521535	6521777
Q9UQP3	+	HGNC22942	1	TNN	fn3	175049301	175049543	fn3	175052903	175054608	fn3	175063131	175063367	fn3	175066558	175066797	fn3	175067473	175067709	fn3	175086080	175086319	fn3	175087702	175087938	fn3	175092541	175092777	fn3	175096096	175097275	Fibrinogen_C	175097748	175116138
P19237	-	HGNC11945	1	TNNI1	Troponin	201380502	201384354
Q59H18	+	HGNC19661	1	TNNI3K	Ank_2	74665476	74715182	Ank_4	74701842	74716378	Ank_4	74715189	74737305	Ank_2	74716427	74801745	Ank_2	74801764	74819665	Pkinase_Tyr	74819720	74902186
P45379	-	HGNC11949	1	TNNT2	Troponin	201330493	201334422	Troponin	201328346	201331059
Q92752	-	HGNC11953	1	TNR	EGF_2	175372282	175372362	fn3	175365707	175365940	fn3	175360442	175363025	fn3	175355189	175355431	fn3	175336365	175348867	fn3	175335029	175335268	fn3	175334167	175334409	fn3	175331820	175332957	fn3	175325476	175328861	fn3	175323545	175324763	Fibrinogen_C	175292540	175306797
Q96GM8	+	HGNC15954	1	TOE1	CAF1	45806807	45808076	CAF1	45807777	45809194	zf-CCCH	45808648	45808804
Q15388	-	HGNC20947	1	TOMM20	MAS20	235277103	235292002
Q969M1	+	HGNC25756	1	TOMM40L	Porin_3	161196355	161198864
Q5JTV8	+	HGNC29456	1	TOR1AIP1	LAP1C	179858474	179887368
Q8NFQ8	-	HGNC24055	1	TOR1AIP2	LAP1C	179815211	179820489
Q9H497	+	HGNC11997	1	TOR3A	Torsin	179052131	179057108
Q13625	-	HGNC12000	1	TP53BP2	Ank_3	223980125	223980214	Ank	223976803	223980115	SH3_1	223971846	223971992
O15350	+	HGNC12003	1	TP73	P53	3624263	3644276	P53_tetramer	3644740	3645968	SAM_2	3647598	3649379
P06753	-	HGNC12012	1	TPM3	Tropomyosin	154140415	154163759
P12270	-	HGNC12017	1	TPR	TPR_MLP1_2	186313141	186314812
Q5T0D9	+	HGNC27007	1	TPRG1L	hSac2	3541820	3544100
A6NFA1	-	HGNC44200	1	TRABD2B	TraB	48244151	48460250
O00463	+	HGNC12035	1	TRAF5	zf-C3HC4	211526714	211527782	zf-TRAF	211533257	211534049	zf-TRAF	211534047	211538744
O43617	-	HGNC19942	1	TRAPPC3	TRAPP	36602872	36605754
Q96F44	-	HGNC16281	1	TRIM11	zf-C3HC4_4	228594094	228594216	zf-B_box	228593878	228594000	PRY	228582801	228582947	SPRY	228582459	228582791
Q9Y577	-	HGNC13430	1	TRIM17	zf-C3HC4_4	228602578	228602727	zf-B_box	228602368	228602493	SPRY	228595925	228596287
Q9UPN9	-	HGNC16290	1	TRIM33	zf-B_box	115006049	115006902	zf-B_box	114976342	115005837	PHD	114945474	114948134	Bromodomain	114940579	114944081
Q9H8W5	-	HGNC19018	1	TRIM45	zf-C3HC4	117663649	117663738	zf-B_box	117661196	117661321	Filamin	117656092	117660691
Q7Z4K8	+	HGNC19019	1	TRIM46	zf-C3HC4	155147895	155148002	zf-B_box	155148702	155149527
Q8NG06	+	HGNC24150	1	TRIM58	zf-C3HC4_4	248020594	248020728	zf-B_box	248020819	248020944	PRY	248039207	248039353	SPRY	248039363	248039692
Q9BVG3	-	HGNC25574	1	TRIM62	zf-C3HC4_4	33646874	33647002	zf-B_box	33646649	33646771	PRY	33613167	33613316	SPRY	33612804	33613157
Q969Q1	-	HGNC16007	1	TRIM63	zf-RING_UBOX	26392862	26393918	zf-B_box	26387680	26387805
Q6ZTA4	+	HGNC31859	1	TRIM67	zf-C3HC4	231298734	231298844	zf-B_box	231299607	231299735	fn3	231339615	231342508	SPRY	231344821	231351144
Q9H3H1	-	HGNC20286	1	TRIT1	IPPT	40312892	40348991	zf-C2H2_jaz	40307559	40309823
Q7Z2T5	-	HGNC16782	1	TRMT1L	TRM	185093043	185113140	TRM	185089285	185093045
Q9NUP7	+	HGNC25502	1	TRMT13	zf-TRM13_CCCH	100598773	100598859	zf-U11-48K	100602456	100602620	TRM13	100606062	100614340
Q9NX07	+	HGNC30813	1	TRNAU1AP	RRM_1	28879635	28887244	RRM_1	28891228	28893902
P10155	+	HGNC11313	1	TROVE2	TROVE	193038230	193050514
Q96A04	+	HGNC30636	1	TSACC	SSTK-IP	156309549	156316770
Q8WW01	+	HGNC16791	1	TSEN15	Sen15	184023545	184041963
P01222	+	HGNC12372	1	TSHB	Cys_knot	115576038	115576806
Q99598	+	HGNC12380	1	TSNAX	Translin	231672988	231700570
O60635	+	HGNC20657	1	TSPAN1	Tetraspannin	46646792	46651199
O60636	-	HGNC20659	1	TSPAN2	Tetraspannin	115593134	115632025
Q96PN8	+	HGNC15473	1	TSSK3	Pkinase	32828330	32829845
Q8NFU3	-	HGNC35410	1	TSTD1	Rhodanese	161007573	161008451
O95801	+	HGNC12394	1	TTC4	TPR_11	55182390	55186888
Q8NBP0	-	HGNC26204	1	TTC13	TPR_11	231075191	231079583	TPR_11	231067562	231075190	TPR_2	231067191	231067555
Q5TAA0	-	HGNC26067	1	TTC22	TPR_8	55266449	55266538	TPR_2	55247233	55247331
A2A3L6	+	HGNC32348	1	TTC24	TPR_1	156551508	156551600	TPR_1	156551616	156551705	TPR_12	156552124	156552958	TPR_1	156553147	156553591
A8MYJ7	-	HGNC34297	1	TTC34	TPR_1	2576957	2700206	TPR_2	2575858	2576773	TPR_9	2573109	2573315	TPR_2	2573016	2573117	TPR_9	2572812	2572952
Q5SRH9	-	HGNC18657	1	TTC39A	DUF3808	51775084	51787456	DUF3808	51755723	51775017
Q9UNY4	+	HGNC12398	1	TTF2	zf-GRF	117602978	117603171	SNF2_N	117622205	117634566	Helicase_C	117635515	117641503
Q6ZT98	-	HGNC26242	1	TTLL7	TTL	84387055	84415576
Q6ZVT0	+	HGNC26693	1	TTLL10	TTL	1116116	1132849
P40222	+	HGNC30685	1	TXLNA	Taxilin	32647178	32660589
O95881	-	HGNC24626	1	TXNDC12	Thioredoxin_7	52489241	52507251
Q9H3M7	+	HGNC16952	1	TXNIP	Arrestin_N	145438830	145439910	Arrestin_C	145440086	145440700
Q6IPR3	+	HGNC24757	1	TYW3	TYW3	75198953	75229599
Q16222	+	HGNC12457	1	UAP1	UDPGP	162535991	162567588
Q14157	+	HGNC29877	1	UBAP2L	DUF3697	154223786	154224043
Q8N2K1	-	HGNC19268	1	UBE2J2	UQ_con	1192425	1203326
Q7Z7E8	-	HGNC15698	1	UBE2Q1	UQ_con	154523420	154525262
Q9NPD8	-	HGNC25009	1	UBE2T	UQ_con	202302164	202304866
Q5VVX9	+	HGNC28559	1	UBE2U	UQ_con	64669755	64680599
O95155	+	HGNC12500	1	UBE4B	Ufd2P_core	10190633	10238812	U-box	10238858	10240002
Q9Y5Z9	+	HGNC30791	1	UBIAD1	UbiA	11333769	11346149
Q8N7F7	+	HGNC32309	1	UBL4B	ubiquitin	110655172	110655378
Q9NRR5	-	HGNC1237	1	UBQLN4	ubiquitin	156021501	156023437	UBA	156006789	156006902
Q5T4S7	-	HGNC30313	1	UBR4	zf-UBR	19487638	19488366	E3_UbLigase_R4	19401388	19426991
Q96LJ8	+	HGNC26354	1	UBXN10	UBX	20517631	20517867
Q5T124	-	HGNC30600	1	UBXN11	SEP	26610907	26612384	UBX	26608939	26609257
Q9Y5K5	-	HGNC19678	1	UCHL5	Peptidase_C12	192997216	193028368
Q9BZX2	+	HGNC12562	1	UCK2	PRK	165797134	165876925
Q9Y3C8	+	HGNC26941	1	UFC1	UFC1	161123803	161128258
Q8TAS1	+	HGNC19683	1	UHMK1	Pkinase	162467857	162482353	RRM_1	162487897	162492280
P07919	+	HGNC12590	1	UQCRH	UCR_hinge	46775827	46782253
Q14146	+	HGNC28967	1	URB2	Urb2	229783305	229795014
P06132	+	HGNC12591	1	UROD	URO-D	45478598	45481146
P22415	-	HGNC12593	1	USF1	HLH	161010069	161010624
O75445	-	HGNC12601	1	USH2A	Laminin_G_3	216498931	216595290	Laminin_N	216496817	216498918	Laminin_EGF	216465658	216495316	Laminin_EGF	216462690	216465633	Laminin_EGF	216424338	216462671	Laminin_EGF	216420503	216424331	Laminin_EGF	216420353	216420496	Laminin_EGF	216420203	216420352	Laminin_EGF	216420044	216420196	Laminin_EGF	216405443	216420037	Laminin_EGF	216390888	216405436	Laminin_EGF	216390735	216390881	fn3	216373086	216373340	fn3	216371684	216373052	fn3	216363589	216370046
O94782	+	HGNC12607	1	USP1	UCH	62907226	62916289
Q9UK80	+	HGNC12620	1	USP21	UCH	161131858	161135204
Q9UPU5	-	HGNC12623	1	USP24	UCH	55561013	55567339
Q8TEY7	-	HGNC20059	1	USP33	zf-UBP	78205015	78207107	UCH	78181428	78200098	DUSP	78177500	78180397	DUSP	78163073	78167122
Q86UV5	-	HGNC18533	1	USP48	UCH	22056242	22083188
Q9Y3A2	+	HGNC24329	1	UTP11L	Utp11	38478511	38489297
O95399	-	HGNC12636	1	UTS2	Urotensin_II	7907873	7907908
Q15836	+	HGNC12644	1	VAMP3	Synaptobrevin	7833530	7839699
O75379	-	HGNC12645	1	VAMP4	Synaptobrevin	171673660	171688329
Q8TAA9	+	HGNC15512	1	VANGL1	Strabismus	116202263	116233997
Q9ULK5	+	HGNC15511	1	VANGL2	Strabismus	160385682	160395165
Q86V25	+	HGNC25723	1	VASH2	Vasohibin	213125023	213146297
Q9UKW4	-	HGNC12659	1	VAV3	CH	108322090	108507490	RhoGEF	108298111	108313319	PH	108247679	108293796	C1_1	108247178	108247645	SH3_2	108160194	108185368	SH2	108138945	108152553	SH3_2	108115958	108116793
P19320	+	HGNC12663	1	VCAM1	I-set	101186040	101186303	C2-set	101188632	101190181	ig	101190203	101190436	I-set	101194674	101194934	C2-set	101196810	101197975	Ig_2	101197988	101198236	I-set	101200078	101200320
Q6RSH7	-	HGNC30666	1	VHLL	VHL	156268566	156268853
Q7Z5H4	+	HGNC19870	1	VN1R5	V1R	247419581	247419949	V1R	247420124	247420372
Q5THJ4	+	HGNC23595	1	VPS13D	Chorein_N	12294327	12304475	VPS13	12304633	12318124	VPS13_mid_rpt	12328798	12336348	UBA	12382797	12387733	SHR-BD	12416102	12429629	VPS13_C	12463940	12516110
Q9NRW7	+	HGNC14579	1	VPS45	Sec1	150039981	150116899
Q15906	-	HGNC11644	1	VPS72	YL1	151150535	151162584	YL1_C	151149257	151149343
Q5VU13	-	HGNC32063	1	VSIG8	V-set	159827880	159828672	V-set	159826314	159827726
Q7Z7D3	-	HGNC28873	1	VTCN1	V-set	117699199	117699522	Ig_3	117695749	117695985
Q6PCB0	+	HGNC30910	1	VWA1	VWA	1372333	1372848	fn3	1374466	1374699	fn3	1374826	1375077
Q5TIE3	+	HGNC26538	1	VWA5B1	VIT_2	20637098	20639426	VWA_3	20649960	20657446
Q9UGM6	-	HGNC12730	1	WARS2	tRNA-synt_1b	119575671	119683179
Q9Y6W5	-	HGNC12733	1	WASF2	WH2	27734799	27736227
Q9UNX4	+	HGNC12755	1	WDR3	WD40	118476105	118477203	WD40	118477213	118479415	WD40	118479425	118481133	WD40	118481134	118482177	WD40	118491061	118492421	WD40	118492748	118494649	WD40	118495008	118495243	Utp12	118497938	118501959
Q9H7D7	-	HGNC21208	1	WDR26	WD40	224599137	224599253	WD40	224592137	224592259	WD40	224581692	224585891	WD40	224581566	224581682
O94967	-	HGNC29141	1	WDR47	WD40	109525961	109529145	WD40	109524430	109525287	WD40	109517314	109524417	WD40	109517188	109517304
B1ANS9	+	HGNC26570	1	WDR64	WD40	241907719	241912868
Q9BQA1	-	HGNC29652	1	WDR77	WD40	111986519	111989740
Q8N5D0	+	HGNC29175	1	WDTC1	WD40	27589709	27609874	TPR_11	27624457	27627774	TPR_2	27627781	27627858	WD40	27630213	27631546	WD40	27631556	27631672
Q5T9L3	-	HGNC30238	1	WLS	MIG-14_Wnt-bd	68603484	68620909
Q93097	+	HGNC12781	1	WNT2B	wnt	113057530	113063095
P56704	+	HGNC15983	1	WNT3A	wnt	228210423	228247163
P56705	-	HGNC12783	1	WNT4	wnt	22446545	22456291
O14904	-	HGNC12778	1	WNT9A	wnt	228109224	228113137
P47992	+	HGNC10645	1	XCL1	IL8	168549324	168550365
Q9UBD3	-	HGNC10646	1	XCL2	IL8	168510282	168511318
Q9H6D3	+	HGNC25508	1	XKR8	XK-related	28286620	28293555
Q9UBH6	+	HGNC12827	1	XPR1	SPX	180601338	180775272	EXS	180793927	180849254
P54577	-	HGNC12840	1	YARS	tRNA-synt_1b	33248080	33276624	tRNA_bind	33245060	33246680
P67809	+	HGNC8014	1	YBX1	CSD	43149082	43162342
Q9Y548	-	HGNC25231	1	YIPF1	Yip1	54331953	54344334
Q5VVQ6	-	HGNC25035	1	YOD1	OTU	207222592	207222948
Q86U90	-	HGNC28905	1	YRDC	Sua5_yciO_yrdC	38269975	38273629
Q9Y5A9	+	HGNC31675	1	YTHDF2	YTH	29070010	29070417
P86452	+	HGNC33273	1	ZBED6	zf-BED	203767047	203767193	zf-BED	203767449	203767595	Dimer_Tnp_hAT	203769249	203769494
O15156	+	HGNC18668	1	ZBTB7B	BTB	154983465	154987469
Q96BR9	+	HGNC24172	1	ZBTB8A	BTB	33058572	33058898
Q8NAP8	+	HGNC37057	1	ZBTB8B	BTB	32936265	32936591
Q8IWT0	-	HGNC24094	1	ZBTB8OS	Archease	33087501	33116075
Q13105	-	HGNC12936	1	ZBTB17	BTB	16273484	16274950	zf-C2H2	16271277	16271442	zf-C2H2	16270929	16270997	zf-C2H2	16270181	16270341	zf-C2H2_4	16269150	16269221
Q99592	+	HGNC13030	1	ZBTB18	BTB	244217143	244217466	zf-C2H2_4	244218331	244218402
Q5TC79	+	HGNC28365	1	ZBTB37	BTB	173839427	173839741	zf-C2H2	173854951	173855019
Q9NUA8	+	HGNC29045	1	ZBTB40	BTB	22816481	22816789	zf-met	22850815	22850883
Q5SVQ8	-	HGNC24819	1	ZBTB41	BTB	197169066	197169374	zf-C2H2_6	197160907	197160987	zf-met	197157521	197159902	zf-C2H2_6	197144240	197145768	zf-met	197141293	197141364
P10074	+	HGNC4930	1	ZBTB48	BTB	6640715	6641026	zf-C2H2_6	6648214	6648375	zf-C2H2	6648866	6649005
O75152	+	HGNC29093	1	ZC3H11A	zf-CCCH_3	203786199	203798610
Q5D1E8	+	HGNC26259	1	ZC3H12A	RNase_Zc3h12a	37941497	37948086
Q5TAX3	-	HGNC28981	1	ZCCHC11	PAP_assoc	52941187	52943520	NTP_transf_2	52927220	52933888	PAP_assoc	52911656	52912077	zf-CCHC	52903899	52903952	zf-CCHC	52902466	52902519
Q9NP64	+	HGNC30246	1	ZCCHC17	S1	31782982	31811839
Q9NUE0	+	HGNC20712	1	ZDHHC18	zf-DHHC	27175161	27179255
Q49AA0	+	HGNC24708	1	ZFP69	KRAB	40954766	40955202	zf-C2H2	40960961	40961029	zf-C2H2	40961045	40961113
Q9UJL9	+	HGNC28053	1	ZFP69B	SCAN	40916634	40916759	KRAB	40922623	40923017	zf-C2H2	40928659	40928727	zf-C2H2_6	40928908	40928988	zf-C2H2	40928995	40929063
O95405	+	HGNC6775	1	ZFYVE9	FYVE	52705169	52729543	SARA	52732365	52732481	DUF3480	52759241	52811815
O75844	+	HGNC12877	1	ZMPSTE24	Peptidase_M48_N	40724064	40737613	Peptidase_M48	40737620	40758332
Q5SVZ6	+	HGNC26253	1	ZMYM1	zf-FCS	35562989	35563111	zf-FCS	35563127	35569989	zf-FCS	35570233	35570343	DUF4371	35578908	35579615	Dimer_Tnp_hAT	35580516	35580785
Q5VZL5	+	HGNC13055	1	ZMYM4	zf-FCS	35836044	35836166	zf-FCS	35836188	35846953	zf-FCS	35847222	35847353	zf-FCS	35852808	35853099	zf-FCS	35853103	35854527	DUF3504	35881072	35885209
O95789	-	HGNC13050	1	ZMYM6	zf-FCS	35480669	35484993	zf-FCS	35476153	35476429	zf-FCS	35474517	35476149	DUF4371	35453706	35454122
Q8NCS4	-	HGNC40021	1	ZMYM6NB	DoxX_2	35447634	35450887
Q9H0C1	-	HGNC21192	1	ZMYND12	zf-MYND	42915678	42921619	TPR_2	42905529	42905606	TPR_8	42901044	42902168
Q15973	-	HGNC12907	1	ZNF124	KRAB	247322366	247323108	zf-C2H2	247320323	247320391	zf-C2H2_6	247320146	247320226	zf-C2H2	247320071	247320139	zf-C2H2	247319903	247319971
Q5BKZ1	+	HGNC14104	1	ZNF326	AKAP95	90482883	90492942
Q5T0B9	+	HGNC18079	1	ZNF362	zf-C2H2	33747267	33747335	zf-C2H2	33760560	33760765
Q9C0F3	-	HGNC20814	1	ZNF436	KRAB	23689712	23693654	zf-C2H2_6	23689388	23689465	zf-C2H2	23689310	23689378	zf-C2H2	23689226	23689294	zf-C2H2	23689142	23689210	zf-C2H2	23689058	23689126	zf-C2H2	23688974	23689042	zf-C2H2	23688890	23688958	zf-C2H2	23688722	23688790	zf-C2H2	23688554	23688622	zf-C2H2	23688470	23688538
Q96IT1	-	HGNC23713	1	ZNF496	SCAN	247492499	247492768	KRAB	247473638	247473745
O00488	+	HGNC30943	1	ZNF593	zf-C2H2_jaz	26496652	26496966
Q9H582	-	HGNC29222	1	ZNF644	zf-H2C2_5	91405353	91405424	zf-H2C2_5	91405263	91405337	zf-H2C2_5	91405080	91405154
Q5T619	-	HGNC18190	1	ZNF648	zf-C2H2	182026071	182026142	zf-H2C2_5	182025981	182026055	zf-C2H2	182025483	182025551
Q96BR6	-	HGNC25736	1	ZNF669	KRAB	247265091	247265408	zf-C2H2_6	247264122	247264157	zf-C2H2_6	247263909	247263989	zf-C2H2	247263750	247263818
Q9BS34	-	HGNC28167	1	ZNF670	KRAB	247202170	247202832	zf-C2H2_6	247201254	247201334	zf-C2H2_4	247201176	247201247	zf-C2H2_6	247201086	247201166	zf-C2H2	247200927	247200995	zf-C2H2	247200843	247200911
Q499Z4	+	HGNC26179	1	ZNF672	zf-C2H2_6	249141957	249142034	zf-C2H2_4	249142152	249142223	zf-C2H2	249142404	249142472	zf-C2H2_6	249142485	249142562
Q5SXM1	+	HGNC28652	1	ZNF678	zf-C2H2	227842159	227842227	zf-C2H2_6	227842240	227842320	zf-C2H2_6	227842324	227842404	zf-C2H2	227842411	227842479	zf-C2H2_6	227842492	227842572	zf-C2H2	227842663	227842731	zf-C2H2	227842831	227842899	zf-C2H2_6	227842912	227842989	zf-C2H2	227842999	227843067	zf-C2H2	227843167	227843235
Q8IZ20	-	HGNC28495	1	ZNF683	zf-C2H2	26689627	26691072	zf-met	26688462	26688608
Q5T5D7	+	HGNC28418	1	ZNF684	KRAB	41006264	41007288	zf-C2H2	41012554	41012622	zf-C2H2	41012638	41012706	zf-C2H2_6	41012719	41012790	zf-C2H2_6	41012803	41012883	zf-C2H2	41013058	41013126
Q8N1G0	+	HGNC29277	1	ZNF687	zf-C2H2_11	151263362	151263448	zf-met	151263569	151263637
Q5VV52	+	HGNC28028	1	ZNF691	zf-C2H2	43316879	43316947	zf-C2H2	43316963	43317031	zf-C2H2	43317047	43317115	zf-C2H2	43317131	43317199	zf-C2H2	43317299	43317367
Q8IW36	-	HGNC30954	1	ZNF695	KRAB	247163247	247163369	zf-C2H2_6	247150937	247151017	zf-C2H2_6	247150853	247150933	zf-C2H2	247150694	247150762	zf-C2H2_6	247150433	247150513
Q5TEC3	-	HGNC32034	1	ZNF697	zf-C2H2	120166116	120166184	zf-C2H2	120165840	120165908	zf-C2H2	120165588	120165656
Q9NWK9	-	HGNC26089	1	ZNHIT6	zf-HIT	86172022	86173321
Q12836	-	HGNC15770	1	ZP4	Trefoil	238051664	238051783	Zona_pellucida	238048075	238050849
O95218	-	HGNC13058	1	ZRANB2	zf-RanBP	71544243	71546653	zf-RanBP	71542496	71544164
P17040	+	HGNC13093	1	ZSCAN20	SCAN	33945028	33945297	Myb_DNA-bind_4	33956825	33957082	Myb_DNA-bind_4	33958789	33959046	zf-C2H2	33960156	33960224	zf-C2H2	33960240	33960308	zf-C2H2	33960324	33960392	zf-C2H2	33960567	33960635	zf-C2H2	33960651	33960719	zf-C2H2	33960819	33960887	zf-C2H2	33960903	33960971
Q8IYH5	-	HGNC24523	1	ZZZ3	Myb_DNA-binding	78044527	78046708	ZZ	78031441	78034033
Q2M2I8	-	HGNC19679	2	AAK1	Pkinase	69754386	69870036
Q13685	-	HGNC18	2	AAMP	WD40	219131617	219132240	WD40	219130820	219131222	WD40	219130571	219130810	WD40	219129813	219130125	WD40	219129276	219129803
Q86UK0	-	HGNC14637	2	ABCA12	ABC2_membrane_3	215854071	215866458	ABC_tran	215846968	215851347	ABC2_membrane_3	215818612	215840659	ABC_tran	215809813	215815637
Q9NP58	-	HGNC47	2	ABCB6	MTABC_N	220081476	220083379	ABC_membrane	220078334	220081448	ABC_tran	220075188	220077776
O95342	-	HGNC42	2	ABCB11	ABC_membrane	169836459	169869986	ABC_tran	169826602	169830346	ABC_membrane	169789012	169814553	ABC_tran	169781190	169787299
Q9H222	-	HGNC13886	2	ABCG5	ABC_tran	44053631	44065032	ABC2_membrane	44041637	44051379
Q9H221	+	HGNC13887	2	ABCG8	ABC_tran	44073390	44079766	ABC2_membrane	44099423	44104767
Q96SE0	+	HGNC17553	2	ABHD1	Abhydrolase_1	27351904	27353489
Q9NYB9	+	HGNC24011	2	ABI2	Abi_HHR	204231759	204255798	SH3_9	204291905	204292051
P28330	-	HGNC88	2	ACADL	Acyl-CoA_dh_N	211081111	211085443	Acyl-CoA_dh_M	211069376	211081101	Acyl-CoA_dh_1	211053696	211069342
P25106	+	HGNC23692	2	ACKR3	7tm_1	237489289	237490053
Q8TDX5	+	HGNC19288	2	ACMSD	Amidohydro_2	135596259	135659409
Q9NUZ1	+	HGNC25621	2	ACOXL	Acyl-CoA_dh_M	111551671	111559272	Acyl-CoA_dh_1	111562901	111753470	ACOX	111789213	111875288
P24666	+	HGNC122	2	ACP1	LMWPc	264989	277289
O95573	+	HGNC3570	2	ACSL3	AMP-binding	223773824	223797912
P63267	+	HGNC145	2	ACTG2	Actin	74128445	74146699
P42025	-	HGNC168	2	ACTR1B	Actin	98273323	98280334
P61160	+	HGNC169	2	ACTR2	Actin	65455050	65495838
P61158	+	HGNC170	2	ACTR3	Actin	114647860	114699840	Actin	114697674	114715008
Q04771	-	HGNC171	2	ACVR1	Activin_recp	158636858	158637082	TGF_beta_GS	158630624	158634650	Pkinase	158594087	158630620
Q8NER5	-	HGNC18123	2	ACVR1C	Activin_recp	158443702	158443926	TGF_beta_GS	158406869	158412652	Pkinase_Tyr	158390465	158406865
P27037	+	HGNC173	2	ACVR2A	Activin_recp	148653896	148657117	Pkinase	148672817	148684744
P14621	+	HGNC180	2	ACYP2	Acylphosphatase	54342836	54531933
P78536	-	HGNC195	2	ADAM17	Pep_M12B_propep	9668032	9695646	Reprolysin_5	9645485	9666331	Disintegrin	9637345	9645388	ADAM17_MPD	9633942	9637284
O75077	+	HGNC202	2	ADAM23	Pep_M12B_propep	207310144	207412179	Reprolysin	207414846	207432040	Disintegrin	207435500	207452066	ADAM_CR	207452073	207459503
O60266	-	HGNC234	2	ADCY3	AC_N	25065160	25141786	Guanylate_cyc	25061367	25065150	Guanylate_cyc	25042872	25046220
P35612	-	HGNC244	2	ADD2	Aldolase_II	70910896	70923447
Q8IZF5	-	HGNC18989	2	ADGRF3	HRM	26536274	26536432	GPS	26534321	26534458	7tm_2	26533093	26534293
Q9BV57	-	HGNC30576	2	ADI1	ARD	3502802	3523251
P18089	-	HGNC282	2	ADRA2B	7tm_1	96780619	96781803
P51826	-	HGNC6473	2	AFF3	AF-4	100623628	100628028	AF-4	100168022	100623681
Q6ULP2	+	HGNC25951	2	AFTPH	Clathrin_bdg	64796230	64800115
Q9UPQ3	+	HGNC16922	2	AGAP1	Ras	236617876	236706422	ArfGap	236949419	237028896	Ank_2	237028927	237032682
Q8NDL9	+	HGNC26147	2	AGBL5	Peptidase_M14	27277535	27280195
P52594	+	HGNC5175	2	AGFG1	ArfGap	228337177	228388491
O00116	+	HGNC327	2	AGPS	FAD_binding_4	178301761	178333191	FAD-oxidase_C	178346831	178402917
P21549	+	HGNC341	2	AGXT	Aminotran_5	241808349	241818187
Q719I0	+	HGNC20437	2	AHSA2	Aha1_N	61404639	61405031
Q9UM73	-	HGNC427	2	ALK	MAM	29606598	29917871	MAM	29498271	29543724	Gly_rich	29449878	29473998	Pkinase_Tyr	29419650	29446220
Q8N6M5	+	HGNC17377	2	ALLC	Allantoicase	3721713	3743395	Allantoicase	3743462	3750129
Q8TCU4	+	HGNC428	2	ALMS1	ALMS_motif	73828543	73836724
P09923	+	HGNC437	2	ALPI	Alk_phosphatase	233321145	233323730
P05187	+	HGNC439	2	ALPP	Alk_phosphatase	233243767	233246367
P10696	+	HGNC441	2	ALPPL2	Alk_phosphatase	233271853	233274444
Q96Q42	-	HGNC443	2	ALS2	RCC1	202626221	202626391	RCC1	202626068	202626208	RCC1	202617883	202619286	RhoGEF	202593840	202609070	MORN	202591241	202591423	MORN	202590143	202591240	MORN	202589163	202590127	MORN	202589103	202589162	MORN	202589022	202589078	MORN	202588103	202588153	MORN	202587807	202588084	MORN	202582903	202587806	VPS9	202566579	202569895
Q53TS8	-	HGNC14438	2	ALS2CR11	ALS2CR11	202400743	202469401
Q8N944	+	HGNC26771	2	AMER3	WTX	131520303	131521001
Q6DCA0	-	HGNC28658	2	AMMECR1L	AMMECR1	128622760	128631483
Q9H1A4	+	HGNC19988	2	ANAPC1	ANAPC1	112534632	112537950
Q7Z5J8	+	HGNC26350	2	ANKAR	Ank_2	190560996	190569948	Ank_2	190569760	190571760	Arm	190575846	190584386
Q9P2S6	-	HGNC20987	2	ANKMY1	MORN	241492471	241494347	MORN	241492402	241492470	MORN	241468863	241492335	Ank_3	241465206	241465674	Ank_2	241452245	241463314	Ank_2	241447060	241451417	Ank_2	241439943	241451312	zf-MYND	241420372	241420494
Q86SG2	-	HGNC24470	2	ANKRD23	Ank_2	97505971	97506606	Ank_2	97505736	97506157	Ank_2	97505466	97505973
A7E2S9	-	HGNC35167	2	ANKRD30BL	Ank_2	132914647	132919154	Ank_2	132912245	132914652
A6QL64	+	HGNC24079	2	ANKRD36	Ank_2	97779582	97784152	Ank_2	97784159	97790284	CCDC144C	97910933	97911808
Q8N2N9	-	HGNC29333	2	ANKRD36B	Ank_2	98201508	98206078	Ank_2	98195418	98201504	CCDC144C	98127600	98128475
Q5JPF3	-	HGNC32946	2	ANKRD36C	Ank_2	96652600	96657350	Ank_2	96646445	96652596	CCDC144C	96521013	96521888
Q53RE8	-	HGNC28640	2	ANKRD39	Ank_2	97519263	97523660	Ank_2	97514106	97519277	Ank_4	97514139	97519250
Q8N8A2	-	HGNC25259	2	ANKRD44	Ank_2	197990710	198051823	Ank_2	197986154	197990125	Ank_2	197975565	197986261	Ank_2	197954752	197986135	Ank_2	197948145	197954730	Ank_4	197946448	197951407	Ank_2	197878268	197943470	Ank_4	197878298	197889939	Ank_2	197872559	197878276	Ank_2	197866511	197872540	Ank_2	197865162	197870510	Ank_2	197863099	197866489	Ank_2	197858313	197863669
Q8N9V6	+	HGNC25691	2	ANKRD53	Ank_2	71206387	71209072	Ank_2	71206866	71209171
Q9H8Y5	+	HGNC25527	2	ANKZF1	Ank_2	220099709	220100199
Q6IWH7	+	HGNC31677	2	ANO7	Anoct_dimer	242130651	242142858	Anoctamin	242142865	242163163
Q9H6X2	+	HGNC21014	2	ANTXR1	VWA	69240761	69304620	Anth_Ig	69317997	69379306	Ant_C	69409625	69472386
P09525	+	HGNC542	2	ANXA4	Annexin	70015228	70033573	Annexin	70033592	70037793	Annexin	70039824	70045819	Annexin	70046432	70052623
Q06278	+	HGNC553	2	AOX1	Fer2	201450856	201462156	Fer2_2	201462181	201467056	FAD_binding_5	201469464	201476210	CO_deh_flav_C	201477344	201478668	Ald_Xan_dh_C	201485448	201488685	Ald_Xan_dh_C2	201492079	201533463
Q96PC3	-	HGNC18971	2	AP1S3	Clat_adaptor_s	224629932	224702166
Q8IW19	+	HGNC28724	2	APLF	zf-CCHH	68765328	68772361	zf-CCHH	68772413	68794512
P04114	-	HGNC603	2	APOB	Vitellogenin_N	21251233	21265333	DUF1943	21242761	21250872	DUF1081	21239432	21242715	ApoB100_C	21224643	21224813
Q8IXF9	+	HGNC19941	2	AQP12A	MIP	241631521	241637599
A6NM10	-	HGNC6096	2	AQP12B	MIP	241619778	241622094
Q53QZ3	+	HGNC21030	2	ARHGAP15	PH	143973956	144193262	RhoGAP	144276891	144525654
P42331	+	HGNC28951	2	ARHGAP25	PH	69002430	69015075	RhoGAP	69034467	69045110
Q9NR80	+	HGNC684	2	ARHGEF4	SH3_1	131796456	131796593	RhoGEF	131797703	131799451	PH	131801055	131802084
A8MVX0	+	HGNC37252	2	ARHGEF33	RhoGEF	39171056	39184132
Q03989	+	HGNC17361	2	ARID5A	ARID	97215106	97216326
P56559	-	HGNC698	2	ARL4C	Arf	235404693	235405229
Q9Y689	-	HGNC696	2	ARL5A	Arf	152659801	152684677
Q8N6S5	+	HGNC24048	2	ARL6IP6	ARL6IP6	153577058	153616315
O15144	+	HGNC705	2	ARPC2	P34-Arc	219093520	219114618
O43150	+	HGNC2721	2	ASAP2	BAR_3	9347324	9475257	PH	9484727	9496338	ArfGap	9496408	9514944	Ank	9519098	9520877	SH3_9	9541430	9543441
Q9Y576	+	HGNC16011	2	ASB1	Ank_2	239344437	239353010	SOCS_box	239355030	239355149
Q9Y575	-	HGNC16013	2	ASB3	Ank_2	53978052	54087016	Ank_2	53956639	53978060	Ank_2	53943863	53977931	Ank_2	53941675	53955911	SOCS_box	53897798	53921119
Q6ZVZ8	-	HGNC19770	2	ASB18	Ank_2	237123460	237146557	Ank_2	237123136	237123438	SOCS_box	237103535	237103654
Q96FT7	+	HGNC21263	2	ASIC4	ASC	220379579	220402034
Q9NWL6	+	HGNC24910	2	ASNSD1	Asn_synthase	190532173	190535398
Q53RT3	-	HGNC26321	2	ASPRV1	Asp_protease_2	70187956	70188228
Q6HA08	-	HGNC31704	2	ASTL	Astacin	96795587	96799763
Q76L83	-	HGNC23805	2	ASXL2	HARE-HTH	26029100	26101060	ASXH	25976404	25990463	PHD_3	25964906	25965088
Q9ULI0	-	HGNC29230	2	ATAD2B	AAA	24056800	24086420	Bromodomain	23988481	24008970
P15336	-	HGNC784	2	ATF2	bZIP_1	175945439	175957925
Q9Y4P1	+	HGNC20790	2	ATG4B	Peptidase_C54	242590681	242610188
Q7Z3C6	-	HGNC22408	2	ATG9A	APG9	220088315	220089575
Q676U5	+	HGNC21498	2	ATG16L1	ATG16	234160519	234173766	WD40	234183407	234186309	WD40	234191388	234198604	WD40	234198614	234198994	WD40	234200910	234201959
P31939	+	HGNC794	2	ATIC	MGS	216177247	216190720	AICARFT_IMPCHas	216190733	216211544
Q8NHH9	-	HGNC24047	2	ATL2	GBP	38536568	38570564	GBP_C	38525498	38536564
Q96SQ7	+	HGNC24126	2	ATOH8	HLH	85982003	85991194
P48201	-	HGNC843	2	ATP5G3	ATP-synt_C	176043027	176043878
P15313	+	HGNC853	2	ATP6V1B1	ATP-synt_ab_N	71170799	71185519	ATP-synt_ab	71187122	71191603	ATP-synt_ab_C	71191652	71192233
Q8NEY4	+	HGNC18264	2	ATP6V1C2	V-ATPase_C	10862985	10923356
Q96A05	-	HGNC18125	2	ATP6V1E2	vATP-synt_E	46739202	46739798
Q9Y679	-	HGNC891	2	AUP1	CUE	74753950	74754170
Q9Y5Z6	+	HGNC916	2	B3GALT1	Galactosyl_T	168725823	168726398
Q9NY97	+	HGNC15629	2	B3GNT2	Galactosyl_T	62449821	62450408
Q8NFL0	+	HGNC18811	2	B3GNT7	Galactosyl_T	232262872	232263465
Q99728	-	HGNC952	2	BARD1	zf-RING_6	215657069	215674172	Ank	215633973	215645318	Ank	215632300	215633972	Ank	215617272	215632293
Q9UIF8	-	HGNC963	2	BAZ2B	MBD	160284478	160285750	DDT	160242887	160243072	WHIM3	160205213	160205329	PHD	160189050	160189196	Bromodomain	160176829	160182167
Q8N3I7	+	HGNC970	2	BBS5	DUF1448	170336082	170361083
O43521	+	HGNC994	2	BCL2L11	Bim_N	111881332	111881442	Bclx_interact	111881710	111907724
Q9H165	-	HGNC13221	2	BCL11A	zf-C2H2	60687754	60687822
Q9Y276	+	HGNC1020	2	BCS1L	BCS1_N	219525783	219526594	AAA	219526940	219527914
O00499	-	HGNC1052	2	BIN1	BAR	127819743	127864467	SH3_9	127806113	127808091
Q9NR09	+	HGNC13516	2	BIRC6	BIR	32617132	32626273	DUF3643	32738040	32740342	UQ_con	32822934	32832656
O95393	-	HGNC20869	2	BMP10	TGFb_propeptide	69093269	69098336	TGF_beta	69092768	69093076
Q13873	+	HGNC1078	2	BMPR2	Activin_recp	203329552	203332387	Pkinase	203379688	203417528
Q9UMX3	+	HGNC1087	2	BOK	Bcl-2	242499106	242509703
Q53S33	-	HGNC24415	2	BOLA3	BolA	74362722	74372420
Q8N9W6	-	HGNC14273	2	BOLL	RRM_1	198641782	198646507
Q9NXR7	+	HGNC1106	2	BRE	BRE	28117445	28521269
O43683	-	HGNC1148	2	BUB1	Mad3_BUB1_I	111430281	111435556	Pkinase	111395690	111399799
Q7L1Q6	+	HGNC18380	2	BZW1	W2	201683571	201685946
Q13901	-	HGNC29911	2	C1D	Sas10_Utp3	68270158	68274390
Q7Z5L3	-	HGNC24181	2	C1QL2	Collagen	119915440	119915631	C1q	119914389	119915367
Q9H1Z8	+	HGNC24642	2	C2orf40	Augurin	106688314	106694379
Q9NWW7	-	HGNC26056	2	C2orf42	zf-tcix	70408946	70409071
Q9H6V9	-	HGNC26145	2	C2orf43	DUF2305	20886731	21001096
Q9H6R7	-	HGNC26157	2	C2orf44	DUF4613	24253952	24262360
Q9BVC5	+	HGNC28772	2	C2orf49	Ashwin	105954081	105961825
Q08AI8	-	HGNC26216	2	C2orf54	Mab-21	241827870	241835161
Q53QW1	+	HGNC28563	2	C2orf57	DUF4678	232457678	232458844
Q8N801	-	HGNC26850	2	C2orf61	SHIPPO-rpt	47317423	47317506	SHIPPO-rpt	47314176	47314265
Q6UXQ4	-	HGNC33809	2	C2orf66	DUF4720	197672172	197674047
Q2NKX9	-	HGNC34353	2	C2orf68	UPF0561	1143881	1144909
Q8N8R5	+	HGNC26799	2	C2orf69	UPF0565	200776327	200790534
A6NJV1	+	HGNC27938	2	C2orf70	DUF2475	26785535	26798950
A6NGG8	-	HGNC34383	2	C2orf71	Retinal	29287809	29297126
A6NCS6	+	HGNC27418	2	C2orf72	DUF4630	231902695	231911727
Q8N5S3	+	HGNC26861	2	C2orf73	GDWWSH	54562039	54587687
A8MZ97	+	HGNC34439	2	C2orf74	DUF4642	61389743	61391659
Q3KRA6	-	HGNC27017	2	C2orf76	DUF2340	120060050	120097513
A6NCI8	+	HGNC34349	2	C2orf78	DUF4629	74042833	74043282
A6NN90	-	HGNC34350	2	C2orf81	DUF4639	74641482	74644519
Q6UX34	+	HGNC33763	2	C2orf82	DUF4690	233740652	233741063
Q53S99	-	HGNC25344	2	C2orf83	Folate_carrier	228493218	228497800
Q9BSF0	+	HGNC28191	2	C2orf88	SmAKAP	191064587	191064868
Q9Y376	+	HGNC20292	2	CAB39	Mo25	231624723	231683395
O00305	-	HGNC1404	2	CACNB4	VGCC_beta4Aa_N	152737430	152739883	Guanylate_kin	152698524	152727091
P27708	+	HGNC1424	2	CAD	CPSase_sm_chain	27440420	27445123	GATase	27445426	27446857	CPSase_L_D2	27448031	27449515	CPSase_L_D3	27454446	27455433	CPSase_L_D2	27456327	27457517	MGS	27458413	27459361	Amidohydro_1	27459686	27462082	OTCace_N	27464057	27465268	OTCace	27465284	27466371
Q16602	-	HGNC16709	2	CALCRL	HRM	188245211	188247899	7tm_2	188216676	188243754
P62158	-	HGNC1445	2	CALM2	EF-hand_7	47389490	47397872	EF-hand_7	47387926	47389453
Q7Z624	+	HGNC26276	2	CAMKMT	Methyltransf_16	44617396	44993640
P40121	-	HGNC1474	2	CAPG	Gelsolin	85628681	85629021	Gelsolin	85626261	85628367	Gelsolin	85622039	85625244
Q9HC96	+	HGNC1477	2	CAPN10	Peptidase_C2	241526368	241534086	Calpain_III	241534455	241535930	Calpain_III	241536156	241537502
Q6MZZ7	-	HGNC16663	2	CAPN13	Peptidase_C2	30976012	31010088	Calpain_III	30966259	30975966
A8MX76	-	HGNC16664	2	CAPN14	Peptidase_C2	31416108	31428183	Calpain_III	31412143	31416068
Q8N187	+	HGNC14435	2	CARF	ALS2CR8	203826074	203839174
Q14790	+	HGNC1509	2	CASP8	DED	202122961	202131281	DED	202131333	202136296	Peptidase_C14	202137472	202149987
Q92851	+	HGNC1500	2	CASP10	DED	202050558	202050800	DED	202050843	202057835	Peptidase_C14	202072834	202082392
Q8IUF1	+	HGNC17907	2	CBWD2	cobW	114195572	114222736	CobW_C	114251337	114253263
Q96AQ1	+	HGNC25197	2	CCDC74A	CCDC92	132285682	132288162	CCDC74_C	132290265	132290959
Q96LY2	-	HGNC25267	2	CCDC74B	CCDC92	130899943	130902430	CCDC74_C	130897139	130897840
Q96PX6	+	HGNC29400	2	CCDC85A	DUF2216	56411856	56420007
Q3V6T2	-	HGNC25523	2	CCDC88A	HOOK	55562174	55646175
Q567U6	-	HGNC25611	2	CCDC93	KOG2701	118743546	118766197
Q6ZUS5	-	HGNC25833	2	CCDC121	DUF4515	27850432	27851527
Q17RM4	-	HGNC25889	2	CCDC142	CCDC142	74701747	74709063
Q0VFZ6	-	HGNC25064	2	CCDC173	TPH	170502554	170531402
P78556	+	HGNC10619	2	CCL20	IL8	228680181	228681098
O60583	+	HGNC1600	2	CCNT2	Cyclin_N	135676446	135700195
Q8N7R7	+	HGNC26868	2	CCNYL1	Cyclin_N	208605398	208615729
[truncated: 15,723 more rows]
[truncated: 885 more columns]

## Sheet: B3
Locus Group	UniProt ID	strand	HGNC ID	Chromosome	Entrez Gene ID	Entrez Gene ID	Approved Symbol	UCSC ID	Ensembl ID	Ensembl Gene ID	RefSeq	RefSeq IDs	VEGA IDs	CCDS IDs	Accession Numbers	geneSymbol	#name	Ensembl	RefSeq	Ensembl	LocusLink	HInv	AllenBrain																								CATH domain locations on proteins	Pfam domain locations on proteins	CATH domains coding region locations on genes
protein-coding gene	U3KPV4	-	HGNC30005	1	127550	127550	A3GALT2	uc031plq.1	ENSG00000184389	ENSG00000184389	NM_001080438	NM_001080438	OTTHUMG00000004125	CCDS60080	A3GALT2P	A3GALT2	uc031plq.1	ENSG00000184389	NM_001080438	ENST00000442999	LOC127550			IGBS3S																							,	,	,
protein-coding gene	Q5VUY0	+	HGNC32037	1	126767	126767	AADACL3	uc031tpe.1	ENSG00000188984	ENSG00000188984	XM_006710337	NM_001103170	OTTHUMG00000001887	CCDS41253	OTTHUMG00000001887	AADACL3	uc009vnn.1	ENSG00000188984	NM_001103170	ENST00000332530	LOC126767	HIT000047701																									,	Abhydrolase_3,58,212,Abhydrolase_3,229,324,	,
protein-coding gene	Q5VUY2	+	HGNC32038	1	343066	343066	AADACL4	uc001auf.3	ENSG00000204518	ENSG00000204518	XM_006710608	NM_001013630	OTTHUMG00000001889	CCDS30590	OTTHUMG00000001889	AADACL4	uc001auf.3	ENSG00000204518	NM_001013630	ENST00000376221	LOC343066																										,	Abhydrolase_3,115,285,Abhydrolase_3,291,381,	,
protein-coding gene	P78363	-	HGNC34	1	24	24	ABCA4	uc001dqh.3	ENSG00000198691	ENSG00000198691	NM_000350	NM_000350	OTTHUMG00000010622	CCDS747	U88667	ABCA4	uc001dqi.1	ENSG00000198691	NM_000350	ENST00000465352	LOC24		RP_060601_02_D04	STGD1	ABCR	RP19		STGD	FFM	ARMD2	CORD3																,	ABC2_membrane_3,607,856,ABC_tran,946,1090,ABC2_membrane_3,1595,1895,ABC_tran,1955,2099,	,
protein-coding gene	Q9NRK6	-	HGNC41	1	23456	23456	ABCB10	uc001htp.4	ENSG00000135776	ENSG00000135776	NM_012089	NM_012089	OTTHUMG00000039471	CCDS1580	U18237	ABCB10	uc001htp.4	ENSG00000135776	NM_012089	ENST00000344517	LOC23456			EST20237	M-ABC2	MTABC2																					,	ABC_membrane,171,442,ABC_tran,510,662,	,
protein-coding gene	P28288	+	HGNC67	1	5825	5825	ABCD3	uc001dqn.4	ENSG00000117528	ENSG00000117528	NM_002858	NM_002858	OTTHUMG00000010717	CCDS749	M81182	ABCD3	uc001dqm.4	ENSG00000117528	NM_001122674	ENST00000315713	LOC5825	HIT000034524		PXMP1	PMP70	ZWS2	CCDS44175																				,	ABC_membrane_2,57,338,ABC_tran,456,599,	,
protein-coding gene	P42684	-	HGNC77	1	27	27	ABL2	uc001gmi.4	ENSG00000143322	ENSG00000143322	NM_001136001	NM_005158	OTTHUMG00000035199	CCDS30947	M14904	ABL2	uc001gmg.4	ENSG00000143322	NM_001136000	ENST00000408940	LOC27	HIT000055099		ABLL	ARG	CCDS44282	CCDS41441	CCDS44283	CCDS41441	CCDS53435	CCDS53436	CCDS53437	CCDS53438														1.10.510.10,279,546,1.20.120.330,1058,1182,3.30.200.20,279,546,	SH3_1,113,159,SH2,173,248,Pkinase_Tyr,288,539,F_actin_bind,1082,1182,	1.10.510.10,279,546,1.20.120.330,1058,1182,3.30.200.20,279,546,
protein-coding gene	P11310	+	HGNC89	1	34	34	ACADM	uc009wbp.4	ENSG00000117054	ENSG00000117054	NM_000016		OTTHUMG00000009784	CCDS668	M16827	ACADM	uc010orc.1	ENSG00000117054	NM_000016	ENST00000370841	LOC34	HIT000056381		MCAD	MCADH	ACAD1	CCDS44165	CCDS65562	CCDS72807																		1.10.540.10,26,421,1.20.140.10,26,421,2.40.110.10,26,421,	Acyl-CoA_dh_N,42,152,Acyl-CoA_dh_M,157,255,Acyl-CoA_dh_1,267,416,	1.10.540.10,26,421,1.20.140.10,26,421,2.40.110.10,26,421,
protein-coding gene	Q96P50	-	HGNC16754	1	116983	116983	ACAP3	uc001aeb.2	ENSG00000131584	ENSG00000131584	NM_030649	NM_030649	OTTHUMG00000002235	CCDS19	AF411981	ACAP3	uc001ady.2	ENSG00000131584	NM_030649	ENST00000354700	LOC116983	HIT000001432	RP_050407_01_G05	CENTB5	KIAA1716																						,	BAR_3,3,236,PH,269,363,ArfGap,403,521,Ank_2,671,766,	,
protein-coding gene	Q9H3P7	-	HGNC15453	1	64746	64746	ACBD3	uc001hpy.3	ENSG00000182827	ENSG00000182827	NM_022735	NM_022735	OTTHUMG00000037560	CCDS1551	AB043587	ACBD3	uc001hpy.3	ENSG00000182827	NM_022735	ENST00000366812	LOC64746	HIT000008794		GOLPH1	GOCAP1	GCP60		PAP7																			,	ACBP,84,170,GOLD_2,397,527,	,
protein-coding gene	Q9BR61	-	HGNC23339	1	84320	84320	ACBD6	uc001gog.3		ENSG00000230124	NM_032360	NM_032360	OTTHUMG00000035117	CCDS1339	BC006505	ACBD6	uc001gog.3	ENSG00000135847	NM_032360	ENST00000367595	LOC84320	HIT000032884	RP_050321_02_D11	MGC2404																							,	ACBP,43,123,Ank_2,163,255,	,
protein-coding gene	Q16570	+	HGNC4035	1	2532	2532	ACKR1	uc001ftp.4	ENSG00000213088	ENSG00000213088	NM_002036	NM_002036	OTTHUMG00000037182	CCDS1183	U01839	DARC	uc001ftp.4	ENSG00000213088	NM_001122951	ENST00000368121	LOC2532			FY	DARC	CCBP1	CCDS44252	GPD	Dfy	CD234																	,	,	,
protein-coding gene	O00154	-	HGNC24157	1	11332	11332	ACOT7	uc001ams.3	ENSG00000097021	ENSG00000097021	XM_005263427	NM_007274	OTTHUMG00000001295	CCDS65	AB074417	ACOT7	uc001amq.3	ENSG00000097021	NM_181866	ENST00000377842	LOC11332	HIT000037971	RP_040315_01_11	BACH	ACH1	ACT	CCDS66	CTE-II	LACH1	CCDS67	CCDS30573	MGC1126	hBACH														3.10.129.10,209,378,	4HBT,68,151,4HBT,242,317,	3.10.129.10,209,378,
protein-coding gene	Q8WXI4	+	HGNC18156	1	26027	26027	ACOT11	uc001cxl.2	ENSG00000162390	ENSG00000162390	NM_015547	NM_015547	OTTHUMG00000009891	CCDS592	AB014607	ACOT11	uc001cxk.3	ENSG00000162390	NM_147161	ENST00000498228	LOC26027	HIT000030471		THEA	STARD14	BFIT	CCDS593	KIAA0707	BFIT1	THEM1																	,	4HBT,62,135,4HBT,234,309,START,384,590,	,
protein-coding gene	Q9NPH0	-	HGNC29609	1	51205	51205	ACP6	uc001epr.2	ENSG00000162836	ENSG00000162836	NM_016361	NM_016361	OTTHUMG00000014019	CCDS928	BC009965	ACP6	uc001epr.2	ENSG00000162836	NM_016361	ENST00000369238	LOC51205	HIT000034699	RP_050303_02_F02	LPAP	ACPL1																						,	His_Phos_2,49,379,	,
protein-coding gene	P68133	-	HGNC129	1	58	58	ACTA1	uc001htm.3	ENSG00000143632	ENSG00000143632	NM_001100	NM_001100	OTTHUMG00000038006	CCDS1578	J00068	ACTA1	uc001htm.3	ENSG00000143632	NM_001100	ENST00000366684	LOC58	HIT000035891	RP_040324_01_C04	ACTA	NEM3																						,	Actin,4,377,	,
protein-coding gene	Q9H568	+	HGNC24018	1	81569	81569	ACTL8	uc001bat.3	ENSG00000117148	ENSG00000117148	NM_030812	NM_030812	OTTHUMG00000002512	CCDS183	AK057339	ACTL8	uc001bat.3	ENSG00000117148	NM_030812	ENST00000375406	LOC81569	HIT000013953		CT57																							,	Actin,2,366,	,
protein-coding gene	P35609	+	HGNC164	1	88	88	ACTN2	uc001hyf.3	ENSG00000077522	ENSG00000077522	NM_001103	NM_001103	OTTHUMG00000040059	CCDS1613	BC047901	ACTN2	uc001hyf.2	ENSG00000077522	NM_001103	ENST00000366578	LOC88	HIT000053271	RP_050705_02_A03	CCDS73053			CCDS60455																				1.10.238.10,822,894,1.20.58.60,274,746,	CH,38,137,CH,151,252,Spectrin,281,391,Spectrin,401,506,Spectrin,516,627,Spectrin,637,740,EFhand_Ca_insen,824,890,	1.10.238.10,822,894,1.20.58.60,274,746,
protein-coding gene	Q8TDY3	+	HGNC24026	1	140625	140625	ACTRT2	uc001ajz.3	ENSG00000169717	ENSG00000169717	NM_080431	NM_080431	OTTHUMG00000000562	CCDS45	AF440740	ACTRT2	uc001ajz.3	ENSG00000169717	NM_080431	ENST00000378404	LOC140625			AB057364	Arp-T2	ARPM2		FLJ25424																			,	Actin,6,377,	,
protein-coding gene	Q13444	+	HGNC193	1	8751	8751	ADAM15	uc001fgr.2	ENSG00000143537	ENSG00000143537	NM_003815	NM_003815	OTTHUMG00000013898	CCDS1084	U46005	ADAM15	uc010pet.2	ENSG00000143537	NM_001261466	ENST00000447332	LOC8751	HIT000036782	RP_040804_01_H03	MDC15	CCDS1086	CCDS1087	CCDS1085	CCDS1088	CCDS44236	CCDS58031	CCDS58032	CCDS60282															,	Pep_M12B_propep,30,161,Reprolysin,213,414,Disintegrin,430,505,ADAM_CR,508,627,	,
protein-coding gene	Q9UKF2	-	HGNC208	1	11085	11085	ADAM30	uc001eij.3	ENSG00000134249	ENSG00000134249	NM_021794	NM_021794	OTTHUMG00000012176	CCDS907	AF171932	ADAM30	uc001eij.3	ENSG00000134249	NM_021794	ENST00000369400	LOC11085	HIT000040541		svph4																							,	Pep_M12B_propep,30,160,Reprolysin,203,393,Disintegrin,408,482,ADAM_CR,485,604,	,
protein-coding gene	O75173	-	HGNC220	1	9507	9507	ADAMTS4	uc001fyt.4	ENSG00000158859	ENSG00000158859	NM_005099	NM_005099	OTTHUMG00000034349	CCDS1223	AB014588	ADAMTS4	uc001fyt.4	ENSG00000158859	NM_005099	ENST00000367996	LOC9507	HIT000000413	RP_041116_02_G11	KIAA0688	ADAMTS-2	ADMP-1																					3.40.390.10,213,520,	Pep_M12B_propep,50,181,Reprolysin,218,428,TSP_1,524,574,ADAM_spacer1,686,803,	3.40.390.10,213,520,
protein-coding gene	Q6UY14	+	HGNC19706	1	54507	54507	ADAMTSL4	uc001eux.4	ENSG00000143382	ENSG00000143382	NM_019032	NM_019032	OTTHUMG00000034863	CCDS955	BC027478	ADAMTSL4	uc001euw.3	ENSG00000143382	NM_025008	ENST00000369041	LOC54507	HIT000050920		TSRC1	DKFZP434K1772	CCDS72908	CCDS30852																				,	TSP_1,48,81,ADAM_spacer1,485,600,TSP_1,728,783,TSP_1,787,841,TSP_1,915,970,TSP_1,975,1025,PLAC,1033,1063,	,
protein-coding gene	P55265	-	HGNC225	1	103	103	ADAR	uc001ffh.3	ENSG00000160710	ENSG00000160710	NM_001111	NM_001111	OTTHUMG00000037261	CCDS1071	BC038227	ADAR	uc001ffl.1	ENSG00000160710	NM_015841	ENST00000368471	LOC103	HIT000055290		IFI4	G1P1	ADAR1	CCDS30879																				1.10.10.10,125,209,1.10.10.10,294,366,	z-alpha,135,201,z-alpha,295,359,dsrm,504,569,dsrm,615,680,dsrm,727,792,A_deamin,886,1215,	1.10.10.10,125,209,1.10.10.10,294,366,
protein-coding gene	Q8NI60	+	HGNC16812	1	56997	56997	ADCK3	uc001hqn.1	ENSG00000163050	ENSG00000163050	NM_020247	NM_020247	OTTHUMG00000037621	CCDS1557	AJ278126	ADCK3	uc010pvp.1	ENSG00000163050	NM_020247	ENST00000366777	LOC56997	HIT000032262		CABC1	COQ8	SCAR9																					,	ABC1,318,434,	,
protein-coding gene	Q96PN6	-	HGNC21285	1	55811	55811	ADCY10	uc001ger.3	ENSG00000143199	ENSG00000143199	XM_006711449	NM_018417	OTTHUMG00000034573	CCDS1265	AF271058	ADCY10	uc001ger.3	ENSG00000143199	NM_018417	ENST00000367851	LOC55811		RP_050818_02_C10	SAC	Sacy	SACI	CCDS53426	HCA2	RP1-313L4.2	CCDS72977																	,	Guanylate_cyc,37,219,Guanylate_cyc,285,463,	,
protein-coding gene	O60241	-	HGNC944	1	576	576	ADGRB2	uc001btn.3	ENSG00000121753	ENSG00000121753	XM_006710783	NM_001703	OTTHUMG00000003885	CCDS72746	AB005298	BAI2	uc001btn.3	ENSG00000121753	NM_001703	ENST00000373658	LOC576	HIT000043265	RP_051206_01_A07	BAI2			CCDS72747																				,	TSP_1,313,361,TSP_1,368,416,TSP_1,424,471,TSP_1,479,527,GAIN,609,848,GPS,872,917,7tm_2,929,1198,	,
protein-coding gene	O95490	+	HGNC18582	1	23266	23266	ADGRL2	uc001diu.3	ENSG00000117114	ENSG00000117114	XR_248786	NM_012302	OTTHUMG00000009844	CCDS689	AJ131581	LPHN2	uc001diu.3	ENSG00000117114	NM_012302	ENST00000335786	LOC23266	HIT000000511		LPHH1	LPHN2	KIAA0786	CCDS72811	LEC1																			,	Gal_Lectin,49,129,OLF,140,392,HRM,466,524,GAIN,533,760,GPS,786,830,7tm_2,844,1080,Latrophilin,1100,1459,	,
protein-coding gene	Q9HBW9	-	HGNC20822	1	64123	64123	ADGRL4	uc001diq.4	ENSG00000162618	ENSG00000162618	NM_022159	NM_022159	OTTHUMG00000009738	CCDS41352	AF192403	ELTD1	uc001diq.4	ENSG00000162618	NM_022159	ENST00000370742	LOC64123	HIT000039987		ELTD1	ETL																						,	EGF_CA,58,107,GAIN,133,342,GPS,368,412,7tm_2,424,660,	,
protein-coding gene	Q96A54	-	HGNC24040	1	51094	51094	ADIPOR1	uc001gyq.6	ENSG00000159346	ENSG00000159346	XM_006711360	NM_015999	OTTHUMG00000041391	CCDS1430	PAQR1	ADIPOR1	uc010pqd.3	ENSG00000159346	NR_046083	ENST00000340990	LOC51094	HIT000035064	RP_041208_01_A02	ACDCR1																							,	HlyIII,129,352,	,
protein-coding gene	P30542	+	HGNC262	1	134	134	ADORA1	uc001gzf.1	ENSG00000163485	ENSG00000163485	NM_001048230	NM_000674	OTTHUMG00000042125	CCDS1434	BC026340	ADORA1	uc010pqg.1	ENSG00000163485	NM_000674	ENST00000367235	LOC134	HIT000040207		RDC7																							,	7tm_1,26,288,	,
protein-coding gene	P0DMS8	-	HGNC268	1	140	140	ADORA3	uc001ebh.4	ENSG00000121933	ENSG00000121933	NM_000677	NM_000677	OTTHUMG00000011957	CCDS838	BC029831									AD026	CCDS41369	NM_020683	CCDS839																				,	,	,
protein-coding gene	Q9NX46	+	HGNC21304	1	54936	54936	ADPRHL2	uc001bzt.3	ENSG00000116863	ENSG00000116863	NM_017825	NM_017825	OTTHUMG00000007628	CCDS402	AJ427295	ADPRHL2	uc001bzt.3	ENSG00000116863	NM_017825	ENST00000373178	LOC54936	HIT000002280	RP_050303_01_B01	ARH3	FLJ20446																						1.10.4080.10,18,363,	ADP_ribosyl_GH,25,338,	1.10.4080.10,18,363,
protein-coding gene	P30520	-	HGNC292	1	159	159	ADSS	uc001iaj.3	ENSG00000035687	ENSG00000035687	NM_001126	NM_001126	OTTHUMG00000040102	CCDS1624	BC012356	ADSS	uc001iaj.3	ENSG00000035687	NM_001126	ENST00000366535	LOC159	HIT000035776																									1.10.300.10,21,456,3.40.440.10,21,456,3.90.170.10,21,456,	Adenylsucc_synt,31,453,	1.10.300.10,21,456,3.40.440.10,21,456,3.90.170.10,21,456,
protein-coding gene	Q5VU57	-	HGNC25892	1	84871	84871	AGBL4	uc001cru.2	ENSG00000186094	ENSG00000186094	NM_032785	NM_032785	OTTHUMG00000007793	CCDS44137	AK027348	AGBL4	uc001crv.1	ENSG00000186094	NM_032785	ENST00000416121	LOC84871	HIT000010620		FLJ14442	CCP6																						,	Peptidase_M14,174,439,	,
protein-coding gene	P35573	+	HGNC321	1	178	178	AGL	uc001dsi.1	ENSG00000162688	ENSG00000162688	NM_000028	NM_000028	OTTHUMG00000010803	CCDS759	BC078663	AGL	uc001dsi.1	ENSG00000162688	NM_000642	ENST00000361915	LOC178			CCDS761			CCDS760																				,	hGDE_N,31,116,hDGE_amylase,120,550,hGDE_central,697,974,GDE_C,1042,1527,	,
protein-coding gene	Q9BSE5	-	HGNC18407	1	79814	79814	AGMAT	uc001awv.2	ENSG00000116771	ENSG00000116771	NM_024758	NM_024758	OTTHUMG00000002357	CCDS160	AY057097	AGMAT	uc001awv.2	ENSG00000116771	NM_024758	ENST00000375826	LOC79814	HIT000049305	RP_051012_01_D09	FLJ23384																							,	Arginase,71,345,	,
protein-coding gene	Q9UL18	+	HGNC3262	1	26523	26523	AGO1	uc001bzl.3	ENSG00000092847	ENSG00000092847	NM_012199		OTTHUMG00000007381	CCDS398	AF093097	AGO1	uc001bzk.3	ENSG00000092847	NM_012199	ENST00000373204	LOC26523	HIT000004096	RP_050705_02_E03	EIF2C1	hAGO1																						2.170.260.10,225,369,	ArgoN,26,164,ArgoL1,174,224,PAZ,229,363,ArgoL2,373,418,ArgoMid,427,509,Piwi,515,816,	2.170.260.10,225,369,
protein-coding gene	Q9H9G7	+	HGNC18421	1	192669	192669	AGO3	uc001bzp.3	ENSG00000126070	ENSG00000126070	NM_024852	NM_024852	OTTHUMG00000184172	CCDS399	AB046787	AGO3	uc001bzn.1	ENSG00000126070	NM_024852	ENST00000324350	LOC192669	HIT000011068	RP_050705_02_E04	EIF2C3	hAGO3	FLJ12765	CCDS400																				,	ArgoN,20,167,ArgoL1,177,227,PAZ,232,366,ArgoL2,376,421,ArgoMid,430,512,Piwi,518,819,	,
protein-coding gene	Q9HCK5	+	HGNC18424	1	192670	192670	AGO4	uc001bzj.2	ENSG00000134698	ENSG00000134698	NM_017629	NM_017629	OTTHUMG00000004243	CCDS397	AB046787	AGO4	uc001bzj.2	ENSG00000134698	NM_017629	ENST00000373210	LOC192670	HIT000001282		EIF2C4	hAGO4	KIAA1567		FLJ20033																			,	ArgoN,18,156,ArgoL1,166,216,PAZ,221,355,ArgoL2,365,412,ArgoMid,421,503,Piwi,509,820,	,
protein-coding gene	O00468	+	HGNC329	1	375790	375790	AGRN	uc001ack.2	ENSG00000188157	ENSG00000188157	NM_198576	NM_198576	OTTHUMG00000040778	CCDS30551	XM_372195	AGRN	uc001ack.2	ENSG00000188157	NM_198576	ENST00000379370	LOC375790	HIT000004860	RP_050419_04_D05	AGRIN																							,	NtA,31,146,Kazal_2,202,242,Kazal_2,276,317,Kazal_1,335,389,Kazal_2,421,461,Kazal_2,494,534,Kazal_2,559,599,Kazal_2,620,664,Kazal_2,709,750,Laminin_EGF,793,844,Laminin_EGF,847,901,Kazal_2,928,969,SEA,1132,1238,EGF,1333,1365,Laminin_G_1,1400,1531,EGF,1553,1584,Laminin_G_1,1668,1803,Laminin_G_1,1919,2050,	,
protein-coding gene	P01019	-	HGNC333	1	183	183	AGT	uc001hty.5	ENSG00000135744	ENSG00000135744	NM_000029	NM_000029	OTTHUMG00000037757	CCDS1585	K02215	AGT	uc001hty.4	ENSG00000135744	NM_000029	ENST00000366667	LOC183	HIT000035265	RP_040315_01_23	SERPINA8																							2.30.39.10,34,485,3.30.497.10,34,485,	Serpin,108,481,	2.30.39.10,34,485,3.30.497.10,34,485,
protein-coding gene	Q6RW13	+	HGNC13539	1	57085	57085	AGTRAP	uc001asv.3	ENSG00000177674	ENSG00000177674	NM_001040194	NM_020350	OTTHUMG00000002230	CCDS136	AF165187	AGTRAP	uc001asu.3	ENSG00000177674	NM_001040196	ENST00000376629	LOC57085	HIT000037947	RP_050316_01_F03	ATRAP	CCDS30586	CCDS41248	CCDS30585	CCDS44056																			,	AGTRAP,9,154,	,
protein-coding gene	Q8WYP5	-	HGNC24618	1	25909	25909	AHCTF1	uc001ibv.3	ENSG00000153207	ENSG00000153207	NM_015446	NM_015446	OTTHUMG00000040706	CCDS1629	ELYS	AHCTF1	uc009xgs.1	ENSG00000153207	NM_015446	ENST00000470300	LOC25909	HIT000027125					CCDS1629																				,	ELYS-bb,1,489,ELYS,722,955,	,
protein-coding gene	O43865	+	HGNC344	1	10768	10768	AHCYL1	uc001dyx.3	ENSG00000168710	ENSG00000168710	NM_006621		OTTHUMG00000011652	CCDS818	U82761	AHCYL1	uc001dyx.3	ENSG00000168710	NM_006621	ENST00000369799	LOC10768	HIT000035045	RP_050324_01_G12	XPVKONA	IRBIT	PPP1R78	CCDS55620																				3.40.50.1480,89,530,3.40.50.720,89,530,	AdoHcyase,104,240,AdoHcyase,238,529,AdoHcyase_NAD,289,450,	3.40.50.1480,89,530,3.40.50.720,89,530,
protein-coding gene	Q5TGY3	-	HGNC25230	1	27245	27245	AHDC1	uc009vsy.3	ENSG00000126705	ENSG00000126705	XM_005245848		OTTHUMG00000003398	CCDS30652	AK125431	AHDC1	uc021ojw.1							DJ159A19.3	RP1-159A19.1																						,	DUF4683,566,642,	,
protein-coding gene	Q96BJ3	-	HGNC25761	1	64853	64853	AIDA	uc001hnn.3	ENSG00000186063	ENSG00000186063	NM_022831	NM_022831	OTTHUMG00000037653	CCDS1533	BC043142	AIDA	uc001hnn.3	ENSG00000186063	NM_022831	ENST00000340020	LOC64853	HIT000028630		C1orf80	FLJ12806																						,	Aida_N,9,112,Aida_C2,156,301,	,
protein-coding gene	Q8N1P7	-	HGNC17295	1	55057	55057	AIM1L	uc001bmd.4	ENSG00000176092	ENSG00000176092	NM_001039775	NM_001039775.2	OTTHUMG00000003490		CRYBG2	AIM1L	uc001bmf.3	ENSG00000176092	NM_001039775	ENST00000522993	LOC55057	HIT000025552		FLJ38020																							,	Crystall,29,110,Crystall,124,210,Crystall,218,299,Crystall,312,391,Crystall,399,479,Ricin_B_lectin,484,611,	,
protein-coding gene	O14862	-	HGNC357	1	9447	9447	AIM2	uc001ftj.1	ENSG00000163568	ENSG00000163568	NM_004833	NM_004833	OTTHUMG00000037183	CCDS1181	AF024714	AIM2	uc001ftj.1	ENSG00000163568	NM_004833	ENST00000368130	LOC9447	HIT000035132		PYHIN4																							2.40.50.140,144,343,	PYRIN,8,82,HIN,150,317,	2.40.50.140,144,343,
protein-coding gene	Q9UKB5	+	HGNC30801	1	55966	55966	AJAP1	uc001aln.3	ENSG00000196581	ENSG00000196581	NM_001042478	NM_018836	OTTHUMG00000000645	CCDS54	AF175409	AJAP1	uc001alm.1	ENSG00000196581	NM_001042478	ENST00000378190	LOC55966			SHREW1	SHREW-1	MOT8																					,	AJAP1_PANP_C,181,388,	,
protein-coding gene	P54819	-	HGNC362	1	204	204	AK2	uc001bwp.2	ENSG00000004455	ENSG00000004455	NM_013411	NM_001625	OTTHUMG00000004131	CCDS373	U84371	AK2	uc001bwq.2	ENSG00000004455	NR_037591	ENST00000373449	LOC204	HIT000034341	RP_060518_03_F08				CCDS374																				3.40.50.300,1,239,	ADK,20,206,ADK_lid,142,177,	3.40.50.300,1,239,
protein-coding gene	P27144	+	HGNC363	1	205	205	AK4	uc001dby.3	ENSG00000162433	ENSG00000162433	NM_203464	NM_013410	OTTHUMG00000009033	CCDS629	AK025926	AK4	uc001dby.3	ENSG00000162433	NM_203464	ENST00000545314	LOC205	HIT000052346		AK3	AK3L1																						3.40.50.300,1,223,	ADK,10,190,ADK_lid,126,161,	3.40.50.300,1,223,
protein-coding gene	Q9Y6K8	+	HGNC365	1	26289	26289	AK5	uc001dhn.3	ENSG00000154027	ENSG00000154027	NM_012093	NM_174858	OTTHUMG00000009796	CCDS675	AF062595	AK5	uc001dhm.2	ENSG00000154027	NM_174858	ENST00000317704	LOC26289	HIT000015834					CCDS676																				3.40.50.300,366,562,	ADK,137,294,ADK,381,537,	3.40.50.300,366,562,
protein-coding gene	Q9H9L7	+	HGNC25744	1	79647	79647	AKIRIN1	uc001ccw.3	ENSG00000174574	ENSG00000174574	NM_024595	NM_024595	OTTHUMG00000007496	CCDS433	AK022728	AKIRIN1	uc001ccw.3	ENSG00000174574	NM_024595	ENST00000432648	LOC79647	HIT000017491	RP_041208_01_H07	C1orf108	FLJ12666		CCDS44113																				,	,	,
protein-coding gene	Q5T1N1	-	HGNC28398	1	254268	254268	AKNAD1	uc001dwa.4	ENSG00000162641	ENSG00000162641	NM_152763	NM_152763	OTTHUMG00000011231	CCDS791	AK095517	AKNAD1	uc001dwa.4	ENSG00000162641	NM_152763	ENST00000370001	LOC254268	HIT000027128		C1orf62	MGC26989																						,	AKNA,327,421,	,
protein-coding gene	P14550	+	HGNC380	1	10327	10327	AKR1A1	uc001coe.3	ENSG00000117448	ENSG00000117448	NM_001202414	NM_006066	OTTHUMG00000007740	CCDS523	J04794	AKR1A1	uc021omx.1	ENSG00000117448	NM_001202414	ENST00000372070	LOC10327	HIT000029823	RP_041122_02_H01	ALR	DD3																						3.20.20.100,2,325,	Aldo_ket_red,16,294,	3.20.20.100,2,325,
protein-coding gene	O43488	-	HGNC389	1	8574	8574	AKR7A2	uc001bbw.3	ENSG00000053371	ENSG00000053371	NM_003689	NM_003689	OTTHUMG00000002522	CCDS194	AF026947	AKR7A2	uc001bbw.3	ENSG00000053371	NM_003689	ENST00000235835	LOC8574	HIT000033168	RP_050113_01_F11	AFAR																							3.20.20.100,30,359,	Aldo_ket_red,41,348,	3.20.20.100,30,359,
protein-coding gene	O95154	-	HGNC390	1	22977	22977	AKR7A3	uc001bbv.1	ENSG00000162482	ENSG00000162482	NM_012067	NM_012067	OTTHUMG00000002523	CCDS193	AF040639	AKR7A3	uc001bbv.1	ENSG00000162482	NM_012067	ENST00000361640	LOC22977	HIT000039976																									3.20.20.100,8,331,	Aldo_ket_red,12,320,	3.20.20.100,8,331,
protein-coding gene	Q8NHP1	-	HGNC24056	1	246181	246181	AKR7L	uc021ohn.1	ENSG00000211454	ENSG00000211454	NR_040288	NM_201252	OTTHUMG00000002520		AFAR3	AKR7L	uc021ohn.1	ENSG00000211454	NR_040288	ENST00000420396	LOC246181																										,	Aldo_ket_red,12,320,	,
protein-coding gene	Q9Y243	-	HGNC393	1	10000	10000	AKT3	uc001iab.2	ENSG00000117020	ENSG00000117020	NM_005465	NM_181690	OTTHUMG00000039994	CCDS31076	AF124141	AKT3	uc001hzz.1	ENSG00000117020	NM_181690	ENST00000336199	LOC10000	HIT000024687		PKBG	RAC-gamma	PRKBG	CCDS31077																				2.30.29.30,1,118,	PH,6,107,Pkinase,148,405,Pkinase_C,426,476,	2.30.29.30,1,118,
protein-coding gene	P30038	-	HGNC406	1	8659	8659	ALDH4A1	uc001bbc.3	ENSG00000159423	ENSG00000159423	NM_003748		OTTHUMG00000002443	CCDS188	U24266	ALDH4A1	uc010ocu.2	ENSG00000159423	NM_001161504	ENST00000538309	LOC8659	HIT000033313	RP_050310_01_C07	ALDH4	P5CDh		CCDS53272																				3.40.309.10,18,563,3.40.605.10,18,563,	Aldedh,74,547,	3.40.309.10,18,563,3.40.605.10,18,563,
protein-coding gene	P49189	-	HGNC412	1	223	223	ALDH9A1	uc001gdh.1	ENSG00000143149	ENSG00000143149	NM_000696		OTTHUMG00000034677	CCDS1250	U34252	ALDH9A1	uc010pky.1	ENSG00000143149	NM_000696	ENST00000354775	LOC223	HIT000035248	RP_040907_02_A12	ALDH7	ALDH4	ALDH9		E3																			,	Aldedh,21,483,	,
protein-coding gene	Q9Y672	+	HGNC23157	1	29929	29929	ALG6	uc021oof.1	ENSG00000088035	ENSG00000088035	NM_013339	NM_013339	OTTHUMG00000009140	CCDS30735	AF063604	ALG6	uc021oof.1	ENSG00000088035	NM_013339	ENST00000371108	LOC29929	HIT000005974																									,	Alg6_Alg8,14,488,	,
protein-coding gene	Q96F25	-	HGNC28287	1	199857	199857	ALG14	uc001dra.2	ENSG00000172339	ENSG00000172339	NM_144988	NM_144988	OTTHUMG00000010781	CCDS752	MGC19780	ALG14	uc001dra.2	ENSG00000172339	NM_144988	ENST00000370205	LOC199857	HIT000035390																									,	Alg14,39,215,	,
protein-coding gene	P05186	+	HGNC438	1	249	249	ALPL	uc001bet.3	ENSG00000162551	ENSG00000162551	NM_001127501	NM_000478	OTTHUMG00000002949	CCDS217	BC021289	ALPL	uc001bet.3	ENSG00000162551	NM_000478	ENST00000374840	LOC249	HIT000022267		HOPS	TNSALP	CCDS53275	CCDS53274																				,	Alk_phosphatase,51,490,	,
protein-coding gene	O95076	-	HGNC449	1	257	257	ALX3	uc001dzb.3	ENSG00000156150	ENSG00000156150	NM_006492	NM_006492	OTTHUMG00000011650	CCDS819	AF008203	ALX3	uc001dzb.3	ENSG00000156150	NM_006492	ENST00000369792	LOC257			FND																							,	Homeobox,154,210,	,
protein-coding gene	Q86WK6	-	HGNC20824	1	57463	57463	AMIGO1	uc001dxx.4	ENSG00000181754	ENSG00000181754	NM_020703	NM_020703	OTTHUMG00000011653	CCDS30795	AMIGO	AMIGO1	uc021org.1					HIT000000879		KIAA1163																							,	LRR_8,62,122,LRR_8,110,170,I-set,272,358,	,
protein-coding gene	P23109	-	HGNC468	1	270	270	AMPD1	uc001efe.2	ENSG00000116748	ENSG00000116748	NM_001172626		OTTHUMG00000011892	CCDS876	M60092	AMPD1	uc001efe.2	ENSG00000116748	NM_000036	ENST00000369538	LOC270	HIT000021932	RP_050421_01_C03	MAD	MADA	CCDS53349	CCDS876																				,	A_deaminase,329,736,	,
protein-coding gene	Q01433	+	HGNC469	1	271	271	AMPD2	uc001dyc.2	ENSG00000116337	ENSG00000116337	NM_004037		OTTHUMG00000011649	CCDS804	S47833	AMPD2	uc009wfh.2	ENSG00000116337	NM_001257360	ENST00000342115	LOC271	HIT000008980		SPG63	CCDS30796	CCDS58016	CCDS805																				,	A_deaminase,411,818,	,
protein-coding gene	P04745	+	HGNC474	1	276	276	AMY1A		ENSG00000237763	ENSG00000237763	XM_005270755	NM_001008221	OTTHUMG00000011020	CCDS30782	AMY1	AMY1A	uc001duu.3	ENSG00000237763	NM_001008221	ENST00000370083	LOC276		RP_050421_01_C05																								2.60.40.1180,16,511,3.20.20.80,16,511,	Alpha-amylase,51,347,Alpha-amylase_C,421,508,	2.60.40.1180,16,511,3.20.20.80,16,511,
protein-coding gene	P04745	+	HGNC475	1	277	277	AMY1B	uc001duv.3	ENSG00000174876	ENSG00000174876	XM_005270758	NM_001008218	OTTHUMG00000011021	CCDS30783	AMY1	AMY1A	uc001duv.3	ENSG00000237763	NM_001008218	ENST00000370083	LOC276		RP_050421_01_C05																								2.60.40.1180,16,511,3.20.20.80,16,511,	Alpha-amylase,51,347,Alpha-amylase_C,421,508,	2.60.40.1180,16,511,3.20.20.80,16,511,
protein-coding gene	P04745	-	HGNC476	1	278	278	AMY1C	uc001duw.1	ENSG00000187733	ENSG00000187733	XM_005270761	NM_001008219	OTTHUMG00000011045	CCDS30784	AMY1	AMY1A	uc001duw.1	ENSG00000174876	NM_001008219	ENST00000330330	LOC276																										2.60.40.1180,16,511,3.20.20.80,16,511,	Alpha-amylase,51,347,Alpha-amylase_C,421,508,	2.60.40.1180,16,511,3.20.20.80,16,511,
protein-coding gene	P04746	+	HGNC477	1	279	279	AMY2A	uc001dut.3	ENSG00000243480	ENSG00000243480	NM_000699	NM_000699	OTTHUMG00000011023	CCDS783	BC007060	AMY2A	uc010ouq.1	ENSG00000243480	NM_000699	ENST00000414303	LOC279	HIT000033019	RP_050421_01_C05	AMY2																							2.60.40.1180,17,511,3.20.20.80,16,511,	Alpha-amylase,46,347,Alpha-amylase_C,421,508,	2.60.40.1180,17,511,3.20.20.80,16,511,
protein-coding gene	P19961	+	HGNC478	1	280	280	AMY2B	uc001duq.4	ENSG00000240038	ENSG00000240038	NM_020978	NM_020978	OTTHUMG00000011024	CCDS782	M24895	AMY2B	uc010ouo.2	ENSG00000240038	NM_020978	ENST00000361355	LOC280	HIT000027203	RP_040831_01_B07	AMY2																							,	Alpha-amylase,51,347,Alpha-amylase_C,421,508,	,
protein-coding gene	Q5VTE6	-	HGNC30534	1	90806	90806	ANGEL2	uc001hjz.3	ENSG00000174606	ENSG00000174606	XM_005273344	NM_144567	OTTHUMG00000036927	CCDS1512	AL079275	ANGEL2	uc001hkb.3	ENSG00000174606	NM_144567	ENST00000460337	LOC90806	HIT000037774	RP_040916_02_B03	KIAA0759L	FLJ12793	Ccr4d	CCDS73027																				,	Exo_endo_phos,170,533,	,
protein-coding gene	O95841	-	HGNC489	1	9068	9068	ANGPTL1	uc001gma.3	ENSG00000116194	ENSG00000116194	NM_004673	NM_004673	OTTHUMG00000035075	CCDS1327	AF107253	ANGPTL1	uc010pnc.1	ENSG00000116194	NM_004673	ENST00000234816	LOC9068	HIT000053534	RP_050524_04_H01	ANGPT3	ANG3	AngY		ARP1																			,	Fibrinogen_C,276,490,	,
protein-coding gene	Q9Y5C1	+	HGNC491	1	27329	27329	ANGPTL3	uc001das.2	ENSG00000132855	ENSG00000132855	NM_014495	NM_014495	OTTHUMG00000009146	CCDS622	AF152562	ANGPTL3	uc001das.2	ENSG00000132855	NM_014495	ENST00000371129	LOC27329		RP_060601_01_D08	ANGPT5																							,	Fibrinogen_C,242,454,	,
protein-coding gene	O43827	+	HGNC24078	1	10218	10218	ANGPTL7	uc001ase.4	ENSG00000171819	ENSG00000171819	NM_021146	NM_021146	OTTHUMG00000002002	CCDS128	Y16132	ANGPTL7	uc001ase.4	ENSG00000171819	NM_021146	ENST00000376819	LOC10218	HIT000030717		CDT6	AngX																						,	Fibrinogen_C,127,342,	,
protein-coding gene	Q8N6S4	-	HGNC25374	1	81573	81573	ANKRD13C	uc001dex.4	ENSG00000118454	ENSG00000118454	NM_030816	NM_030816	OTTHUMG00000009343	CCDS648	DKFZP566D1346	ANKRD13C	uc001dey.4					HIT000050662		dJ677H15.3																							,	Ank_2,92,207,GPCR_chapero_1,259,532,	,
protein-coding gene	Q69YU3	+	HGNC27639	1	284615	284615	ANKRD34A	uc021ouy.2	ENSG00000272031	ENSG00000272031	NM_001039888		OTTHUMG00000013740	CCDS72874	AK128050	ANKRD34A	uc021ouy.1					HIT000026350		ANKRD34																							,	Ank_2,54,143,	,
protein-coding gene	Q8N283	+	HGNC26323	1	148741	148741	ANKRD35	uc001eob.1	ENSG00000198483	ENSG00000198483	NM_144698	NM_144698	OTTHUMG00000013743	CCDS72867	AK091120	ANKRD35	uc010oyx.1	ENSG00000198483	NM_144698	ENST00000355594	LOC148741	HIT000015987		FLJ25124			CCDS72868																				,	Ank_2,24,117,Ank_2,58,150,Ank_2,124,216,	,
protein-coding gene	Q5TZF3	-	HGNC24786	1	339416	339416	ANKRD45	uc001gja.1	ENSG00000183831	ENSG00000183831	NM_198493	NM_198493	OTTHUMG00000040546	CCDS1309	FLJ45235	ANKRD45	uc001gja.1	ENSG00000183831	NM_198493	ENST00000333279	LOC339416	HIT000047043	RP_050316_02_H12	CT117																							,	Ank_4,93,146,	,
protein-coding gene	E5RJM6	-	HGNC42950	1	441869	441869	ANKRD65	uc010nyo.2	ENSG00000235098	ENSG00000235098	NM_001243535		OTTHUMG00000002911	CCDS55558	CCDS57963	ANKRD65	uc010nyo.2	ENSG00000235098	NM_001145210	ENST00000537107	LOC441869						CCDS57962																				,	Ank_2,45,137,Ank_5,60,114,Ank_2,132,233,Ank_2,240,332,Ank_2,273,365,	,
protein-coding gene	Q9BTT0	-	HGNC16673	1	81611	81611	ANP32E	uc031uya.1	ENSG00000143401	ENSG00000143401	NM_030920	NM_030920	OTTHUMG00000012547	CCDS946	AK092672	ANP32E	uc010pbu.2	ENSG00000143401	NM_001136479	ENST00000314136	LOC81611	HIT000027576	RP_050927_01_H10	LANPL	MGC5350	LANP-L	CCDS44214	CCDS44215	CCDS60245																		,	LRR_9,11,162,	,
protein-coding gene	O76027	+	HGNC547	1	8416	8416	ANXA9	uc001ewa.2	ENSG00000143412	ENSG00000143412	NM_003568	NM_003568	OTTHUMG00000035063	CCDS975	AJ009985	ANXA9	uc001ewa.2	ENSG00000143412	NM_003568	ENST00000368947	LOC8416	HIT000032464	RP_050215_02_D01	ANX31																							,	Annexin,45,110,Annexin,117,182,Annexin,201,264,Annexin,274,339,	,
protein-coding gene	Q9Y6B7	-	HGNC572	1	10717	10717	AP4B1	uc001eeb.3	ENSG00000134262	ENSG00000134262	NM_006594	NM_006594	OTTHUMG00000011943	CCDS865	AF092094	AP4B1	uc001eee.1	ENSG00000134262	NM_001253853	ENST00000462591	LOC10717	HIT000014181		SPG47	BETA-4																						,	Adaptin_N,6,525,B2-adapt-app_C,621,731,	,
protein-coding gene	P02743	+	HGNC584	1	325	325	APCS	uc001ftv.3	ENSG00000132703	ENSG00000132703	NM_001639	NM_001639	OTTHUMG00000022741	CCDS1186	SAP	APCS	uc001ftv.3	ENSG00000132703	NM_001639	ENST00000255040	LOC325	HIT000033018	RP_050421_01_E07	PTX2	MGC88159																						2.60.120.200,20,223,	Pentaxin,26,219,	2.60.120.200,20,223,
protein-coding gene	Q96BI3	-	HGNC29509	1	51107	51107	APH1A	uc001ety.2	ENSG00000117362	ENSG00000117362	NM_001077628	NM_016022	OTTHUMG00000012545	CCDS41390	AF151835	APH1A	uc001ety.2	ENSG00000117362	NM_001077628	ENST00000360244	LOC51107	HIT000034408		APH-1A	CGI-78	CCDS58025	CCDS41391																				,	Aph-1,2,239,	,
protein-coding gene	Q8N2Z9	+	HGNC23163	1	378708	378708	APITD1		ENSG00000175279	ENSG00000175279	NR_036462	NM_199294	OTTHUMG00000059085	CCDS114	BC029430	APITD1	uc001are.3	ENSG00000175279	NM_199294	ENST00000309048	LOC378708	HIT000040756	RP_050927_04_F08	CENPS	CENP-S	MHF1	CCDS115	FAAP16																			1.10.20.10,1,114,	CENP-S,17,92,	1.10.20.10,1,114,
protein-coding gene	Q8NCW5	+	HGNC18453	1	128240	128240	APOA1BP	uc001fph.3	ENSG00000163382	ENSG00000163382	NM_144772	NM_144772	OTTHUMG00000033206	CCDS1145	AJ315849	APOA1BP	uc031pqp.1	ENSG00000163382	NM_144772	ENST00000368234	LOC128240		RP_050301_01_F06	AIBP	MGC119143	MGC119144		MGC119145	YJEFN1																		,	YjeF_N,80,247,	,
protein-coding gene	P02652	-	HGNC601	1	336	336	APOA2	uc001fzc.1	ENSG00000158874	ENSG00000158874	NM_001643	NM_001643	OTTHUMG00000034346	CCDS1226		APOA2	uc001fzc.1	ENSG00000158874	NM_001643	ENST00000367990	LOC336	HIT000032344	RP_050125_01_H04																								,	ApoA-II,24,98,	,
protein-coding gene	Q8WW27	-	HGNC32152	1	403314	403314	APOBEC4	uc001gqn.3	ENSG00000173627	ENSG00000173627	NM_203454	NM_203454	OTTHUMG00000035459	CCDS1358	BC021711	APOBEC4	uc021pgc.1							C1orf169	MGC26594	FLJ25691		RP1-127C7.4																			,	APOBEC_N,47,227,	,
protein-coding gene	Q96PS8	+	HGNC16029	1	89872	89872	AQP10	uc001feu.3	ENSG00000143595	ENSG00000143595	NM_080429	NM_080429	OTTHUMG00000035980	CCDS1065	AF159174	AQP10	uc001feu.3	ENSG00000143595	NM_080429	ENST00000324978	LOC89872																										,	MIP,15,260,	,
protein-coding gene	P84077	+	HGNC652	1	375	375	ARF1	uc001hrr.3	ENSG00000143761	ENSG00000143761	NM_001658	NM_001024227	OTTHUMG00000037595	CCDS1565	M84326	ARF1	uc001hrs.3	ENSG00000143761	NM_001658	ENST00000540651	LOC375	HIT000003095																									3.40.50.300,18,181,	Arf,3,177,	3.40.50.300,18,181,
protein-coding gene	Q52LW3	-	HGNC30207	1	9411	9411	ARHGAP29	uc001dqj.4	ENSG00000137962	ENSG00000137962	NM_004815	NM_004815	OTTHUMG00000010643	CCDS748	PARG1	ARHGAP29	uc001dqk.3	ENSG00000137962	NM_004815	ENST00000482481	LOC9411	HIT000028357																									,	C1_1,613,660,RhoGAP,685,859,	,
protein-coding gene	Q7Z6I6	-	HGNC27414	1	257106	257106	ARHGAP30	uc001fxl.3	ENSG00000186517	ENSG00000186517	NM_001287602	NM_181720	OTTHUMG00000031477	CCDS1215	AL832852	ARHGAP30	uc001fxk.3	ENSG00000186517	NM_181720	ENST00000368013	LOC257106	HIT000054630		FLJ00267	CCDS72958		CCDS30918																				,	RhoGAP,34,186,	,
protein-coding gene	Q92974	-	HGNC682	1	9181	9181	ARHGEF2	uc001fmt.2	ENSG00000116584	ENSG00000116584	NM_004723	NM_004723	OTTHUMG00000017464	CCDS1125	AB014551	ARHGEF2	uc001fmq.2	ENSG00000116584	NM_004723	ENST00000470541	LOC9181	HIT000026490	RP_040407_02_E04	LFP40	GEF-H1	KIAA0651	CCDS53375	P40	CCDS53376																		,	RhoGEF,239,431,PH_13,468,529,	,
protein-coding gene	Q9HCE6	+	HGNC25540	1	55160	55160	ARHGEF10L	uc001ban.3	ENSG00000074964	ENSG00000074964	XM_005245923	NM_018125	OTTHUMG00000002514	CCDS182	AB046846	ARHGEF10L	uc031pli.1	ENSG00000074964	NM_018125	ENST00000434513	LOC55160	HIT000049230		FLJ10521	KIAA1626		CCDS30617																				,	RhoGEF,320,502,	,
protein-coding gene	O15085	-	HGNC14580	1	9826	9826	ARHGEF11	uc001fqn.3	ENSG00000132694	ENSG00000132694	NM_014784	NM_198236	OTTHUMG00000041292	CCDS1162	AB002378	ARHGEF11	uc010phu.2	ENSG00000132694	NM_014784	ENST00000368194	LOC9826	HIT000000086	RP_050526_01_A01	KIAA0380	GTRAP48	PDZ-RHOGEF	CCDS1163																				1.20.900.10,672,1085,2.30.29.30,672,1085,	PDZ,47,120,RGS-like,307,486,RhoGEF,738,922,PH_13,961,1034,	1.20.900.10,672,1085,2.30.29.30,672,1085,
protein-coding gene	Q5VV41	+	HGNC15515	1	27237	27237	ARHGEF16	uc001akg.4	ENSG00000130762	ENSG00000130762	NM_014448	NM_014448	OTTHUMG00000000625	CCDS46	D89016	ARHGEF16	uc009vli.1	ENSG00000130762	NM_014448	ENST00000464620	LOC27237	HIT000031093		NBR	GEF16																						2.30.30.40,622,687,	RhoGEF,288,467,PH,502,620,SH3_9,637,685,	2.30.30.40,622,687,
protein-coding gene	Q8IW93	-	HGNC26604	1	128272	128272	ARHGEF19	uc001ayc.1	ENSG00000142632	ENSG00000142632	NM_153213	NM_153213	OTTHUMG00000002219	CCDS170	BC012982	ARHGEF19	uc001ayc.1	ENSG00000142632	NM_153213	ENST00000270747	LOC128272	HIT000052437	RP_050623_02_B09	FLJ33962	WGEF																						,	RhoGEF,380,559,SH3_9,724,772,	,
protein-coding gene	O14497	+	HGNC11110	1	8289	8289	ARID1A	uc001bmv.1	ENSG00000117713	ENSG00000117713	NM_139135	NM_139135	OTTHUMG00000004004	CCDS285	AB001895	ARID1A	uc001bmw.1	ENSG00000117713	NM_006015	ENST00000374152	LOC8289	HIT000010927		C1orf4	SMARCF1	B120	CCDS44091	P270	C10rf4	BAF250	BAF250a																1.10.150.60,1000,1119,	ARID,1019,1104,DUF3518,1976,2231,	1.10.150.60,1000,1119,
protein-coding gene	Q4LE39	-	HGNC15550	1	51742	51742	ARID4B	uc001hwq.3	ENSG00000054267	ENSG00000054267	NM_016374	NM_016374	OTTHUMG00000039621	CCDS31060	AF214114	ARID4B	uc001hwt.4	ENSG00000054267	NM_016374	ENST00000471257	LOC51742	HIT000057467		RBP1L1	BCAA	BRCAA1	CCDS31061	SAP180																			,	RBB1NT,168,263,ARID,308,394,Tudor-knot,570,626,	,
protein-coding gene	Q96BM9	-	HGNC25192	1	127829	127829	ARL8A	uc001gxk.2	ENSG00000143862	ENSG00000143862	NM_001256129	NM_138795	OTTHUMG00000035923	CCDS1421	BC015408	ARL8A	uc001gxk.2	ENSG00000143862	NM_138795	ENST00000272217	LOC127829	HIT000047011		ARL10B	FLJ45195	Gie2	CCDS73004																				3.40.50.300,9,186,	Arf,8,181,	3.40.50.300,9,186,
protein-coding gene	P27540	-	HGNC700	1		405	ARNT	uc001evr.2	ENSG00000143437	ENSG00000143437	NM_001668		OTTHUMG00000035011	CCDS970	AF001307	ARNT	uc010pck.2	ENSG00000143437	NM_001197325	ENST00000358595	LOC405	HIT000029009		HIF-1beta	bHLHe2	CCDS65641	CCDS971	CCDS65642																			3.30.450.20,354,470,	HLH,90,143,PAS,163,270,PAS_11,360,469,	3.30.450.20,354,470,
protein-coding gene	O15511	-	HGNC708	1	10092	10092	ARPC5	uc021pgb.2	ENSG00000162704	ENSG00000162704	NM_005717	NM_005717	OTTHUMG00000035326	CCDS1357	AF017807	ARPC5	uc021pgb.2	ENSG00000162704	NM_001270439	ENST00000359856	LOC10092	HIT000048869		p16-Arc	ARC16	dJ127C7.3	CCDS58050																				,	P16-Arc,10,151,	,
protein-coding gene	Q5T4W7	+	HGNC727	1	9048	9048	ARTN	uc001ckt.3	ENSG00000117407	ENSG00000117407	NM_057090	NM_057090	OTTHUMG00000007705	CCDS501	AF109401	ARTN	uc001cks.3	ENSG00000117407	NM_057091	ENST00000372359	LOC9048			NBN	EVN	ENOVIN	CCDS502																				2.10.90.10,108,220,	TGF_beta,121,218,	2.10.90.10,108,220,
protein-coding gene	Q9H2C2	+	HGNC29561	1	64801	64801	ARV1	uc001huh.3	ENSG00000173409	ENSG00000173409	NM_022786	NM_022786	OTTHUMG00000037837	CCDS1589	AF271780	ARV1	uc009xfl.1	ENSG00000173409	NM_022786	ENST00000310256	LOC64801	HIT000002455	RP_051012_02_A11																								,	Arv1,33,223,	,
protein-coding gene	Q8TDY4	-	HGNC14987	1	55616	55616	ASAP3	uc001bha.2	ENSG00000088280	ENSG00000088280	NM_017707	NM_017707	OTTHUMG00000003234	CCDS235	AK000206	ASAP3	uc001bgy.1	ENSG00000088280	NM_001143778	ENST00000495646	LOC55616	HIT000002681		DDEFL1	FLJ20199	UPLC1	CCDS44087	CENTB6																			1.25.40.20,416,697,	BAR_3,31,264,PH,303,394,ArfGap,426,544,Ank_2,590,684,	1.25.40.20,416,697,
protein-coding gene	Q8WXJ9	-	HGNC19769	1	127247	127247	ASB17	uc001dhe.2	ENSG00000154007	ENSG00000154007	NM_080868	NM_080868	OTTHUMG00000009787	CCDS671	AF403035	ASB17	uc001dhe.2	ENSG00000154007	NM_080868	ENST00000284142	LOC127247	HIT000023436	RP_050317_02_F09																								,	SOCS_box,253,294,	,
protein-coding gene	Q7RTU5	-	HGNC33169	1	647219	647219	ASCL5	uc031prl.1	ENSG00000232237	ENSG00000232237	NM_001270601	XM_001719321.2	OTTHUMG00000057661	CCDS59202	bHLHa47	ASCL5	uc031prl.1		NM_001270601		LOC647219																										,	HLH,158,208,	,
protein-coding gene	Q9NR48	-	HGNC19088	1	55870	55870	ASH1L	uc001fkt.3	ENSG00000116539	ENSG00000116539	NM_018489	NM_018489	OTTHUMG00000014011	CCDS1113	AB037841	ASH1L	uc001fkt.3	ENSG00000116539	NM_018489	ENST00000368346	LOC55870	HIT000001135		huASH1	ASH1	ASH1L1		KMT2H																			1.20.920.10,2438,2561,2.170.270.10,2074,2293,	SET,2156,2261,Bromodomain,2450,2538,BAH,2661,2798,	1.20.920.10,2438,2561,2.170.270.10,2074,2293,
protein-coding gene	Q8IZT6	-	HGNC19048	1	259266	259266	ASPM	uc001gtu.3	ENSG00000066279	ENSG00000066279	NM_018136	NM_018136	OTTHUMG00000036277	CCDS1389	AY367065	ASPM	uc001gtu.3	ENSG00000066279	NM_018136	ENST00000367409	LOC259266	HIT000057451	RP_050426_01_D12	MCPH5	Calmbp1	ASP	CCDS55672	FLJ10517	FLJ10549																		,	ASH,37,134,CH,1110,1256,IQ,1316,1336,IQ,1348,1368,IQ,1394,1414,IQ,1465,1485,IQ,1488,1508,IQ,1560,1580,IQ,1583,1603,IQ,1633,1652,IQ,1656,1676,IQ,1729,1749,IQ,1752,1772,IQ,1802,1822,IQ,1826,1845,IQ,1848,1864,IQ,1875,1895,IQ,1898,1918,IQ,1971,1991,IQ,2021,2041,IQ,2044,2064,IQ,2094,2114,IQ,2240,2260,IQ,2263,2283,IQ,2312,2332,IQ,2335,2355,IQ,2385,2405,IQ,2408,2428,IQ,2458,2478,IQ,2532,2551,IQ,2625,264…	,
protein-coding gene	O14525	-	HGNC773	1	460	460	ASTN1	uc001glc.4	ENSG00000152092	ENSG00000152092	NM_001286164	NM_004319	OTTHUMG00000035041	CCDS1319	AB006627	ASTN1	uc001glb.1	ENSG00000152092	NM_207108	ENST00000367657	LOC460	HIT000051089		ASTN	CCDS65732		CCDS44280																				,	FXa_inhibition,660,707,	,
protein-coding gene	Q9NVI7	+	HGNC25567	1	55210	55210	ATAD3A	uc001aga.2	ENSG00000197785	ENSG00000197785	NM_018188	NM_018188	OTTHUMG00000000575	CCDS31	AK025865	ATAD3A	uc001aga.2	ENSG00000197785	NM_001170535	ENST00000378756	LOC55210	HIT000036521	RP_050301_02_E03	FLJ10709	CCDS53260		CCDS53259																				,	DUF3523,27,104,DUF3523,131,334,AAA,396,523,	,
protein-coding gene	Q5T9A4	+	HGNC24007	1	83858	83858	ATAD3B	uc001afv.3	ENSG00000160072	ENSG00000160072	XM_005244806	NM_031921	OTTHUMG00000000577	CCDS30	AL834179	ATAD3B	uc001afw.2	ENSG00000160072	NM_031921	ENST00000472194	LOC83858	HIT000048230		TOB3	KIAA1273																						,	DUF3523,27,286,AAA,348,475,	,
protein-coding gene	Q5T2N8	+	HGNC32151	1	219293	219293	ATAD3C	uc001aft.2	ENSG00000215915	ENSG00000215915	NM_001039211	NM_001039211	OTTHUMG00000000531	CCDS44039	AK091918	ATAD3C	uc001aft.2	ENSG00000215915	NM_001039211	ENST00000378785	LOC219293	HIT000016785		FLJ34599																							,	DUF3523,28,110,AAA,173,300,	,
protein-coding gene	P18847	+	HGNC785	1	467	467	ATF3	uc021pit.1	ENSG00000162772	ENSG00000162772	NM_001674	NM_001674	OTTHUMG00000036747	CCDS1506	L19871	ATF3	uc001hjj.3	ENSG00000162772	NM_001674	ENST00000465155	LOC467	HIT000032756		CCDS55688	CCDS58059		CCDS41464																				,	bZIP_1,84,145,	,
protein-coding gene	P18850	+	HGNC791	1	22926	22926	ATF6	uc001gbs.3	ENSG00000118217	ENSG00000118217	NM_007348	NM_007348	OTTHUMG00000023961	CCDS1235	AB015856	ATF6	uc001gbq.2	ENSG00000118217	NM_007348	ENST00000367942	LOC22926	HIT000036931		ATF6A																							,	bZIP_1,305,367,	,
protein-coding gene	Q96DT6	+	HGNC16040	1	84938	84938	ATG4C	uc001dau.4	ENSG00000125703	ENSG00000125703	NM_032852	NM_032852	OTTHUMG00000009142	CCDS623	AK027773	ATG4C	uc001dat.3	ENSG00000125703	NM_178221	ENST00000371120	LOC84938	HIT000011045	RP_050301_02_C03	AUTL1	APG4C	FLJ14867		AUTL3																			,	Peptidase_C54,76,400,	,
protein-coding gene	P05023	+	HGNC799	1	476	476	ATP1A1	uc010oww.3	ENSG00000163399	ENSG00000163399	NM_000701	NM_001160233	OTTHUMG00000012109	CCDS887	D00099	ATP1A1	uc001egd.2	ENSG00000163399	NM_000701	ENST00000488733	LOC476	HIT000031408		CCDS53352			CCDS53351																				,	Cation_ATPase_N,43,111,E1-E2_ATPase,134,365,Cation_ATPase,426,521,Cation_ATPase_C,799,1008,	,
protein-coding gene	P50993	+	HGNC800	1	477	477	ATP1A2	uc001fvc.3	ENSG00000018625	ENSG00000018625	NM_000702	NM_000702	OTTHUMG00000024080	CCDS1196	AB018321	ATP1A2	uc010piz.1	ENSG00000018625	NM_000702	ENST00000472488	LOC477	HIT000016484		MHP2	FHM2																						,	Cation_ATPase_N,41,109,E1-E2_ATPase,132,363,Cation_ATPase,424,518,Cation_ATPase_C,796,1005,	,
protein-coding gene	Q13733	+	HGNC14073	1	480	480	ATP1A4	uc001fve.4	ENSG00000132681	ENSG00000132681	NM_144699	NM_144699	OTTHUMG00000031609	CCDS1197	BC028297	ATP1A4	uc001fve.4	ENSG00000132681	NM_144699	ENST00000368081	LOC480	HIT000055881	RP_050421_02_A02	ATP1AL2			CCDS44255																				,	Cation_ATPase_N,51,119,E1-E2_ATPase,142,373,Cation_ATPase,434,528,Cation_ATPase_C,805,1014,	,
protein-coding gene	P05026	+	HGNC804	1	481	481	ATP1B1	uc001gfr.1	ENSG00000143153	ENSG00000143153	NM_001677		OTTHUMG00000034590	CCDS1276	U16799	ATP1B1	uc001gfr.1	ENSG00000143153	NM_001677	ENST00000367816	LOC481	HIT000029274	RP_050120_02_D04	ATP1B																							,	Na_K-ATPase,3,297,	,
protein-coding gene	P23634	+	HGNC817	1	493	493	ATP2B4	uc001gzw.3	ENSG00000058668	ENSG00000058668	NM_001001396	NM_001001396	OTTHUMG00000035906	CCDS1440	M25874	ATP2B4	uc009xaq.3	ENSG00000058668	NM_001001396	ENST00000367218	LOC493	HIT000054259		ATP2B2	MXRA1	PMCA4	CCDS30977																				,	Cation_ATPase_N,46,116,E1-E2_ATPase,153,304,E1-E2_ATPase,335,454,HAD,462,794,Cation_ATPase_C,867,1049,ATP_Ca_trans_C,1089,1125,ATP_Ca_trans_C,1126,1177,	,
protein-coding gene	P24539	+	HGNC840	1	515	515	ATP5F1	uc001ebc.3	ENSG00000116459	ENSG00000116459	XM_005270929	NM_001688	OTTHUMG00000011745	CCDS836	X60221	ATP5F1	uc009wgf.1	ENSG00000116459	NM_001688	ENST00000369722	LOC515	HIT000037548	RP_050316_02_C07																								,	Mt_ATP-synt_B,83,244,	,
protein-coding gene	Q96LB4	-	HGNC18265	1	127124	127124	ATP6V1G3	uc001gup.3	ENSG00000151418	ENSG00000151418	NM_133262	NM_133326	OTTHUMG00000035661	CCDS1395	AY039760	ATP6V1G3	uc009wzd.3	ENSG00000151418	NM_133262	ENST00000309309	LOC127124			ATP6G3	Vma10		CCDS1396																				,	V-ATPase_G,3,107,	,
protein-coding gene	Q99437	+	HGNC861	1	533	533	ATP6V0B	uc001cld.3	ENSG00000117410	ENSG00000117410	XM_005270944	NM_004047	OTTHUMG00000008298	CCDS505	BC000423	ATP6V0B	uc001clf.3	ENSG00000117410	NM_004047	ENST00000468183	LOC533	HIT000029609	RP_050927_01_C11	ATP6F	VMA16	HATPL	CCDS41315	CCDS72772																			,	ATP-synt_C,50,112,ATP-synt_C,136,198,	,
protein-coding gene	P98198	+	HGNC13534	1	57198	57198	ATP8B2	uc001fex.3	ENSG00000143515	ENSG00000143515	NM_020452	NM_020452	OTTHUMG00000035979	CCDS1066	AB032963	ATP8B2	uc001fey.1	ENSG00000143515	NM_001005855	ENST00000341822	LOC57198	HIT000011500		ATPID	KIAA1137		CCDS41405																				,	PhoLip_ATPase_N,34,100,E1-E2_ATPase,101,370,HAD,408,842,PhoLip_ATPase_C,859,1113,	,
protein-coding gene	Q9NQ11	-	HGNC30213	1	23400	23400	ATP13A2	uc001baa.2	ENSG00000159363	ENSG00000159363	XM_005245809	NM_022089	OTTHUMG00000002293	CCDS175	AL354615	ATP13A2	uc009vpa.1	ENSG00000159363	NM_001141974	ENST00000463860	LOC23400	HIT000049291	RP_041122_01_B05	PARK9	HSA9947	CLN12	CCDS44072	CCDS44073																			,	P5-ATPase,31,176,E1-E2_ATPase,261,502,HAD,510,887,	,
protein-coding gene	Q5TC12	-	HGNC18803	1	64756	64756	ATPAF1	uc001cqh.4	ENSG00000123472	ENSG00000123472	NM_022745	NM_022745	OTTHUMG00000007988	CCDS541	AK026004	ATPAF1	uc021onc.1							FLJ22351	Atp11p	ATP11	CCDS41327	CCDS541	CCDS41327	CCDS57997	CCDS57998																,	ATP11,68,309,	,
protein-coding gene	Q9UII2	+	HGNC871	1	93974	93974	ATPIF1	uc001bpq.3	ENSG00000130770	ENSG00000130770	NM_016311	NM_016311	OTTHUMG00000003533	CCDS319	AL050386	ATPIF1	uc001bpq.3	ENSG00000130770	NM_016311	ENST00000497986	LOC93974	HIT000034497	RP_040923_01_G06	ATPI	IP	ATPIP	CCDS320	MGC1167	MGC8898	CCDS44096																	,	IATP,4,104,	,
protein-coding gene	Q5T6C5	+	HGNC28713	1	127002	127002	ATXN7L2	uc001dxr.3	ENSG00000162650	ENSG00000162650	NM_153340	NM_153340	OTTHUMG00000011027	CCDS30794	BC037582	ATXN7L2	uc001dxr.3	ENSG00000162650	NM_153340	ENST00000369870	LOC127002	HIT000051831	RP_050324_04_G03	MGC46534	FLJ00381																						,	SCA7,224,291,	,
protein-coding gene	Q9H7T9	-	HGNC28363	1	79000	79000	AUNIP	uc031tuh.1	ENSG00000127423	ENSG00000127423	NM_001287490	NM_024037	OTTHUMG00000007372	CCDS266	C1orf135	AUNIP	uc001bkw.1	ENSG00000127423	NM_024037	ENST00000374298	LOC79000	HIT000007600	RP_050519_01_F01	MGC2603	AIBp		CCDS72731																				,	AIB,26,350,	,
protein-coding gene	Q9NWT8	-	HGNC24114	1	54998	54998	AURKAIP1	uc009vkb.1	ENSG00000175756	ENSG00000175756	NM_017900	NM_017900	OTTHUMG00000001413	CCDS25	AKIP	AURKAIP1	uc001afb.1	ENSG00000175756	NM_017900	ENST00000338370	LOC54998	HIT000003090	RP_040826_01_H10	AIP	FLJ20608																						,	DUF1713,127,159,	,
protein-coding gene	P47901	+	HGNC896	1	553	553	AVPR1B	uc001hds.2	ENSG00000198049	ENSG00000198049	NM_000707	NM_000707	OTTHUMG00000184377	CCDS73015	D31833	AVPR1B	uc001hds.2	ENSG00000198049	NM_000707	ENST00000367126	LOC553			AVPR3																							,	7tm_1,51,338,DUF1856,362,413,	,
protein-coding gene	Q5T1B0	+	HGNC26564	1	126859	126859	AXDND1	uc001gmo.3	ENSG00000162779	ENSG00000162779	NM_144696	NM_144696	OTTHUMG00000035266	CCDS30948	BX647935	AXDND1	uc001gmn.2	ENSG00000162779	NM_144696	ENST00000457238	LOC126859	HIT000056582	RP_050602_03_B07	C1orf125	FLJ32940																						,	Ax_dynein_light,199,395,	,
protein-coding gene	Q96A70	+	HGNC29957	1	113451	113451	AZIN2	uc001bwr.3	ENSG00000142920	ENSG00000142920	XM_005270404		OTTHUMG00000004130	CCDS375	AY050635	ADC	uc001bwr.3	ENSG00000142920	NM_052998	ENST00000294517	LOC113451	HIT000050936	RP_051005_02_F07	ADC	ODC-p	ODC1L		KIAA1945	ODCp																		,	Orn_Arg_deC_N,45,283,Orn_DAP_Arg_deC,287,408,	,
protein-coding gene	Q8NCR0	-	HGNC28596	1	148789	148789	B3GALNT2	uc001hxc.3	ENSG00000162885	ENSG00000162885	NM_001277155	NM_152490	OTTHUMG00000040468	CCDS1606	BC029564	B3GALNT2	uc001hxc.3	ENSG00000162885	NM_152490	ENST00000366600	LOC148789	HIT000040825		MGC39558			CCDS60453																				,	Galactosyl_T,302,458,	,
protein-coding gene	O43825	-	HGNC917	1	8707	8707	B3GALT2	uc001gtc.4	ENSG00000162630	ENSG00000162630	NM_003783	NM_003783	OTTHUMG00000035687	CCDS1383	Y15060	B3GALT2	uc021pgr.1						RP_050210_02_C09	beta3Gal-T2																							,	Galactosyl_T,165,359,	,
protein-coding gene	Q96L58	+	HGNC17978	1	126792	126792	B3GALT6	uc001adk.3	ENSG00000176022	ENSG00000176022	NM_080605	NM_080605	OTTHUMG00000001813	CCDS13	AY050570	B3GALT6	uc001adk.3	ENSG00000176022	NM_080605	ENST00000379198	LOC126792			beta3GalT6																							,	Galactosyl_T,71,260,	,
protein-coding gene	O60909	+	HGNC925	1	8704	8704	B4GALT2	uc010okl.2	ENSG00000117411	ENSG00000117411	NM_003780	NM_003780	OTTHUMG00000008296	CCDS506	AF038660	B4GALT2	uc001clg.3	ENSG00000117411	NM_003780	ENST00000372324	LOC8704	HIT000030887		beta4Gal-T2			CCDS55596																				,	Glyco_transf_7N,97,231,Glyco_transf_7C,235,313,	,
protein-coding gene	O60512	-	HGNC926	1	8703	8703	B4GALT3	uc001fys.2	ENSG00000158850	ENSG00000158850	NM_001199873	NM_003779	OTTHUMG00000034348	CCDS1222	BC006099	B4GALT3	uc001fys.2	ENSG00000158850	NM_001199874	ENST00000367998	LOC8703	HIT000034716	RP_040617_02_B03	beta4Gal-T3																							,	Glyco_transf_7N,77,210,Glyco_transf_7C,215,292,	,
protein-coding gene	Q9NY43	-	HGNC954	1	343472	343472	BARHL2	uc001dns.3	ENSG00000143032	ENSG00000143032	NM_020063		OTTHUMG00000010020	CCDS730	AJ251753	BARHL2	uc001dns.3	ENSG00000143032	NM_020063	ENST00000370445	LOC343472																										,	Homeobox,233,289,	,
protein-coding gene	Q9NR55	-	HGNC28915	1	55509	55509	BATF3	uc001hjl.2	ENSG00000123685	ENSG00000123685	NM_018664	NM_018664	OTTHUMG00000036807	CCDS1508	AF255346	BATF3	uc001hjl.2	ENSG00000123685	NM_018664	ENST00000243440	LOC55509	HIT000018538		JUNDM1	SNFT	JDP1																					,	bZIP_1,33,102,	,
protein-coding gene	Q96GW7	+	HGNC23059	1	63827	63827	BCAN	uc001fpp.3	ENSG00000132692	ENSG00000132692	NM_021948	NM_021948	OTTHUMG00000033322	CCDS1149	BC027971	BCAN	uc001fpo.3	ENSG00000132692	NM_198427	ENST00000361588	LOC63827	HIT000039681	RP_Baylor_102646	BEHAB	MGC13038	CSPG7	CCDS1150																				,	V-set,41,155,Xlink,157,251,Xlink,258,353,EGF,650,680,Lectin_C,705,810,Sushi,815,871,	,
protein-coding gene	O75815	-	HGNC973	1	8412	8412	BCAR3	uc001dpz.4	ENSG00000137936	ENSG00000137936	NM_001261408		OTTHUMG00000010301	CCDS745	U92715	BCAR3	uc001dpx.5	ENSG00000137936	NM_001261410	ENST00000539242	LOC8412	HIT000028033	RP_041122_01_D01	NSP2	SH2D3B		CCDS58010																				,	SH2,154,234,RasGEF,551,743,	,
protein-coding gene	O75934	-	HGNC975	1	10286	10286	BCAS2	uc001efa.3	ENSG00000116752	ENSG00000116752	NM_005872	NM_005872	OTTHUMG00000011898	CCDS874	AB020623	BCAS2	uc001efa.3	ENSG00000116752	NM_005872	ENST00000369541	LOC10286	HIT000039672		DAM1	SPF27	Snt309																					,	BCAS2,11,216,	,
protein-coding gene	Q5TBC7	-	HGNC33624	1	440603	440603	BCL2L15	uc001edw.3	ENSG00000188761	ENSG00000188761	NM_001010922	NM_001010922	OTTHUMG00000011940	CCDS30809	C1orf178	BCL2L15	uc001edw.3	ENSG00000188761	NM_001010922	ENST00000369580	LOC440603		RP_050428_04_H05	Bfk	FLJ22588																						,	,	,
protein-coding gene	O00512	+	HGNC1008	1	607	607	BCL9	uc031uul.1	ENSG00000116128	ENSG00000116128	NM_004326	NM_004326	OTTHUMG00000014031	CCDS30833	Y13620	BCL9	uc010ozr.1	ENSG00000116128	NM_004326	ENST00000234739	LOC607																										,	BCL9,350,388,	,
protein-coding gene	O95999	-	HGNC989	1	8915	8915	BCL10	uc021opd.2	ENSG00000142867	ENSG00000142867	NM_003921	NM_003921	OTTHUMG00000009965	CCDS704	AJ006288	BCL10	uc021opd.1	ENSG00000142867	NM_003921	ENST00000370580	LOC8915	HIT000055953	RP_060601_03_B07	CARMEN	CIPER	mE10		c-E10	CLAP																		,	CARD,18,102,	,
protein-coding gene	A8MW95	-	HGNC38606	1	441925	441925	BECN2		ENSG00000196289	ENSG00000196289	NM_001290693		OTTHUMG00000039863		BECN1P1																																,	APG6,116,428,	,
protein-coding gene	Q7L4P6	-	HGNC25668	1	79656	79656	BEND5	uc001crx.4	ENSG00000162373	ENSG00000162373	XM_005271199	NM_024603	OTTHUMG00000008153	CCDS552	BC007932	BEND5	uc001crx.4	ENSG00000162373	NM_024603	ENST00000371833	LOC79656	HIT000033540	RP_050203_02_A02	C1orf165	FLJ11588																						,	BEN,323,401,	,
protein-coding gene	Q8NFU0	-	HGNC17106	1	266675	266675	BEST4	uc001cmm.3	ENSG00000142959	ENSG00000142959	NM_153274	NM_153274	OTTHUMG00000008488	CCDS514	AF440757	BEST4	uc001cmm.3	ENSG00000142959	NM_153274	ENST00000372207	LOC266675			VMD2L2																							,	Bestrophin,8,331,	,
protein-coding gene	P02818	+	HGNC1043	1	632	632	BGLAP	uc001fnt.3	ENSG00000242252	ENSG00000242252	NM_199173	NM_199173	OTTHUMG00000014819	CCDS1134	X04143	BGLAP	uc001fnt.3	ENSG00000242252	NM_199173	ENST00000368272	LOC632	HIT000041888	RP_050125_01_E02	OCN																							,	Gla,57,97,	,
protein-coding gene	Q9H2G9	+	HGNC1065	1	8548	8548	BLZF1	uc001gfy.3	ENSG00000117475	ENSG00000117475	NM_003666	NM_003666	OTTHUMG00000035453	CCDS1278	U79751	BLZF1	uc001gfw.3	ENSG00000117475	NM_003666	ENST00000367807	LOC8548	HIT000038913		JEM-1																							,	DASH_Hsk3,181,226,	,
protein-coding gene	Q7Z5Y6	+	HGNC21650	1	353500	353500	BMP8A	uc001cdi.3	ENSG00000183682	ENSG00000183682	NM_181809	NM_181809	OTTHUMG00000008394	CCDS437	AY303954	BMP8A	uc001cdi.3	ENSG00000183682	NM_181809	ENST00000331593	LOC353500																										,	TGFb_propeptide,29,251,TGF_beta,299,401,	,
protein-coding gene	P34820	-	HGNC1075	1	656	656	BMP8B	uc001cdz.1	ENSG00000116985	ENSG00000116985	NM_001720	NM_001720	OTTHUMG00000009247	CCDS444	BC023526	BMP8B	uc001cdz.1	ENSG00000116985	NM_001720	ENST00000372827	LOC656		RP_050421_04_B05	BMP8	OP-2																						,	TGFb_propeptide,29,251,TGF_beta,299,401,	,
protein-coding gene	Q7Z465	+	HGNC16976	1	149428	149428	BNIPL	uc001ewl.2	ENSG00000163141	ENSG00000163141	NM_138278	NM_138279	OTTHUMG00000035157	CCDS978	AF193056	BNIPL	uc009wmi.2	ENSG00000163141	NM_001159642	ENST00000295294	LOC149428	HIT000040325		BNIPl-1	BNIPL-2	PP753	CCDS53362																				,	BNIP2,83,211,CRAL_TRIO_2,212,350,	,
protein-coding gene	Q9Y3E2	+	HGNC24263	1	51027	51027	BOLA1	uc001etf.3	ENSG00000178096	ENSG00000178096	NM_016074	NM_016074	OTTHUMG00000012087	CCDS939	AF151901	BOLA1	uc021oya.1							CGI-143																							,	BolA,40,113,	,
protein-coding gene	O95861	-	HGNC1096	1	10380	10380	BPNT1	uc001hma.4	ENSG00000162813	ENSG00000162813	XM_005272998	NM_006085	OTTHUMG00000037435	CCDS41469	AF125042	BPNT1	uc001hma.3	ENSG00000162813	NM_006085	ENST00000322067	LOC10380	HIT000005215	RP_051206_01_B08	CCDS65788			CCDS65787																				3.30.540.10,6,308,3.40.190.80,6,308,	Inositol_P,8,303,	3.30.540.10,6,308,3.40.190.80,6,308,
protein-coding gene	Q58F21	+	HGNC1105	1	676	676	BRDT	uc001dom.4	ENSG00000137948	ENSG00000137948	XM_006710853	NM_207189	OTTHUMG00000010113	CCDS735	AF019085	BRDT	uc001dol.4	ENSG00000137948	NM_001242805	ENST00000362005	LOC676	HIT000056782		BRD6	CT9	CCDS55616	CCDS55615	CCDS72820																			1.20.920.10,21,137,	Bromodomain,36,121,Bromodomain,276,364,BET,509,573,BRD4_CDT,904,947,	1.20.920.10,21,137,
protein-coding gene	Q9C0B6	+	HGNC13746	1	57795	57795	BRINP2		ENSG00000198797	ENSG00000198797	XM_005245379	NM_021165	OTTHUMG00000034953	CCDS1320	FAM5B	FAM5B	uc010pna.1	ENSG00000198797	NM_021165	ENST00000361539	LOC57795	HIT000040412		DBCCR1L2																							,	MACPF,64,200,	,
protein-coding gene	Q76B58	-	HGNC22393	1	339479	339479	BRINP3		ENSG00000162670	ENSG00000162670	NM_199051	NM_199051	OTTHUMG00000035533	CCDS1373	AB111893	FAM5C	uc010pot.1	ENSG00000162670	NM_199051	ENST00000534846	LOC339479	HIT000042897	RP_040625_01_C08	FAM5C	DBCCR1L	DBCCR1L1																					,	MACPF,52,207,	,
protein-coding gene	Q5VW32	+	HGNC26512	1	148362	148362	BROX	uc001hns.2	ENSG00000162819	ENSG00000162819	XM_005273065	NM_144695	OTTHUMG00000037650	CCDS1534	C1orf58	BROX	uc001hnq.1	ENSG00000162819	NM_144695	ENST00000340934	LOC148362	HIT000013597		FLJ32421	CCDS73037		CCDS73036																				,	BRO1,25,374,	,
protein-coding gene	Q9NW68	-	HGNC25501	1	55108	55108	BSDC1	uc001bvh.4	ENSG00000160058	ENSG00000160058	XM_005270985	NM_018045	OTTHUMG00000007588	CCDS363	BX641056	BSDC1	uc001bvh.4	ENSG00000160058	NM_018045	ENST00000455895	LOC55108	HIT000040544		FLJ10276	RP4-811H24.7	CCDS44102	CCDS44101	CCDS44103	CCDS72752																		,	BSD,146,203,	,
protein-coding gene	Q8WZ55	+	HGNC16512	1	7809	7809	BSND	uc001cye.3	ENSG00000162399	ENSG00000162399	NM_057176	NM_057176	OTTHUMG00000008112	CCDS602	AY034632	BSND	uc001cye.3	ENSG00000162399	NM_057176	ENST00000371265	LOC7809	HIT000049270		DFNB73	BART																						,	Barttin,27,251,	,
protein-coding gene	Q5XKL5	+	HGNC21019	1	284697	284697	BTBD8	uc001doo.4	ENSG00000189195	ENSG00000189195	NM_183242	NM_183242	OTTHUMG00000010289	CCDS737	AY346333	BTBD8	uc031pnb.1	ENSG00000189195	NM_183242	ENST00000370382	LOC284697																										,	BTB,48,149,BTB,196,304,	,
protein-coding gene	C9JJ37	+	HGNC27145	1	149478	149478	BTBD19	uc010ole.1	ENSG00000222009	ENSG00000222009	NM_001136537	NM_001136537	OTTHUMG00000008493			BTBD19	uc010ole.1	ENSG00000222009	NM_001136537	ENST00000450269	LOC149478	HIT000012764																									,	BTB,19,128,BACK,133,237,	,
protein-coding gene	Q96K17	+	HGNC30547	1	91408	91408	BTF3L4	uc001ctk.3	ENSG00000134717	ENSG00000134717	NM_001136497	NM_152265	OTTHUMG00000008960	CCDS30713	BC021004	BTF3L4	uc001ctk.3	ENSG00000134717	NM_152265	ENST00000313334	LOC91408	HIT000011022		MGC23908	CCDS58001		CCDS44146																				,	NAC,36,92,	,
protein-coding gene	P78543	+	HGNC1131	1	7832	7832	BTG2	uc001gzq.3	ENSG00000159388	ENSG00000159388	NM_006763	NM_006763	OTTHUMG00000035834	CCDS1437	PC3	BTG2	uc001gzq.3	ENSG00000159388	NM_006763	ENST00000290551	LOC7832			TIS21	MGC126063	MGC126064																					,	BTG,9,122,	,
protein-coding gene	Q9H246	+	HGNC15494	1	81563	81563	C1orf21	uc001gqv.1	ENSG00000116667	ENSG00000116667	NM_030806	NM_030806	OTTHUMG00000035386	CCDS1362	AF312864	C1orf21	uc001gqv.1	ENSG00000116667	NM_030806	ENST00000235307	LOC81563	HIT000013101	RP_060601_01_A06	PIG13																							,	DUF4612,2,118,	,
protein-coding gene	Q5SWX8	+	HGNC24299	1	54953	54953	C1orf27	uc031vhj.1	ENSG00000157181	ENSG00000157181	NM_017847	NM_017847	OTTHUMG00000035579	CCDS53448	BC003397	C1orf27	uc021pgg.1	ENSG00000157181	NM_017847	ENST00000367470	LOC54953	HIT000002646	RP_050614_04_B11	FLJ20505	odr-4	TTG1	CCDS53449	CCDS53450																			,	ODR4-like,28,389,	,
protein-coding gene	Q9BU76	-	HGNC19032	1	79169	79169	C1orf35	uc001hrx.3	ENSG00000143793	ENSG00000143793	XR_247040	NM_024319	OTTHUMG00000037793	CCDS1566	AY137773	C1orf35	uc001hrx.3	ENSG00000143793	NM_024319	ENST00000469781	LOC79169	HIT000043250		MGC4174	MMTAG2																						,	MMtag,8,83,	,
protein-coding gene	Q9BWL3	-	HGNC29876	1	25912	25912	C1orf43	uc001fei.2	ENSG00000143612	ENSG00000143612	XM_005245077	NM_015449	OTTHUMG00000035981	CCDS1061	AF077036	C1orf43	uc001fei.2	ENSG00000143612	NM_001098616	ENST00000368521	LOC25912	HIT000029388		NICE-3	DKFZp586G1722	CCDS41404	CCDS1062	CCDS72924																			,	NICE-3,6,188,	,
protein-coding gene	Q9BV19	+	HGNC28795	1	79078	79078	C1orf50	uc001cia.4	ENSG00000164008	ENSG00000164008	NM_024097	NM_024097	OTTHUMG00000007568	CCDS473	BC001711	C1orf50	uc001cia.4	ENSG00000164008	NM_024097	ENST00000372525	LOC79078	HIT000030464		MGC955																							,	DUF2452,27,182,	,
protein-coding gene	Q8N6N3	-	HGNC24871	1	148423	148423	C1orf52	uc001dkv.3	ENSG00000162642	ENSG00000162642	NM_198077	NM_198077	OTTHUMG00000009966	CCDS703	BC029538	C1orf52	uc001dkv.3	ENSG00000162642	NM_198077	ENST00000294661	LOC148423	HIT000046802		gm117	FLJ44982																						,	DUF4660,22,127,	,
protein-coding gene	Q5VUE5	+	HGNC30003	1	388722	388722	C1orf53	uc001guh.3	ENSG00000203724	ENSG00000203724	NM_001024594	NM_001024594	OTTHUMG00000035659	CCDS44290	BC038214	C1orf53	uc001guh.3	ENSG00000203724	NM_001024594	ENST00000367393	LOC388722																										,	,	,
protein-coding gene	Q8WWF1	+	HGNC26258	1	79630	79630	C1orf54	uc001eud.3	ENSG00000118292	ENSG00000118292	NM_024579	NM_024579	OTTHUMG00000012546	CCDS948	BC017761	C1orf54	uc001euc.3	ENSG00000118292	NM_024579	ENST00000369102	LOC79630	HIT000010148	RP_050208_01_C09	FLJ23221			CCDS72905																				,	DUF4634,1,129,	,
protein-coding gene	Q9BUN1	+	HGNC26045	1	54964	54964	C1orf56	uc001ewn.3	ENSG00000143443	ENSG00000143443	NM_017860	NM_017860	OTTHUMG00000035159	CCDS980	BC002469	C1orf56	uc021oyi.1							FLJ20519	MENT																						,	PMSI1,23,336,	,
protein-coding gene	Q13536	-	HGNC30780	1	10485	10485	C1orf61	uc001fou.1	ENSG00000125462	ENSG00000125462	XM_005244832	NM_006365	OTTHUMG00000031022	CCDS1142	CROC4	C1orf61	uc001fou.1	ENSG00000125462	NM_006365	ENST00000368243	LOC10485	HIT000020481																									,	,	,
protein-coding gene	Q8NEQ6	+	HGNC28339	1	149563	149563	C1orf64	uc001axn.3	ENSG00000183888	ENSG00000183888	NM_178840	NM_178840	OTTHUMG00000009523	CCDS166	AK127425	C1orf64	uc001axn.3	ENSG00000183888	NM_178840	ENST00000329454	LOC149563	HIT000047298	RP_050602_01_F08	MGC24047	ERRF																						,	DUF4654,33,169,	,
protein-coding gene	Q5T750	+	HGNC29468	1	100129271	100129271	C1orf68	uc010pdu.2	ENSG00000198854	ENSG00000198854	NM_001024679	NM_001024679	OTTHUMG00000012401	CCDS44226	AF005081	C1orf68	uc010pdu.2	ENSG00000198854	NM_001024679	ENST00000368775	LOC100129271			LEP7																							,	,	,
protein-coding gene	Q96LT6	-	HGNC26319	1	148304	148304	C1orf74	uc001hhp.1	ENSG00000162757	ENSG00000162757	NM_152485	NM_152485	OTTHUMG00000036483	CCDS1491	AK057807	C1orf74	uc021pio.1							FLJ25078																							,	DUF4504,21,269,	,
protein-coding gene	Q6NZ36	-	HGNC26428	1	199990	199990	C1orf86	uc001aiy.3	ENSG00000162585	ENSG00000162585	NM_182533	NM_182533	OTTHUMG00000001404	CCDS38	AK126870	C1orf86	uc031pkt.1	ENSG00000162585	NM_001256945	ENST00000414253	LOC199990	HIT000012207	RP_050324_04_D06	FLJ31031	FAAP20	CCDS72686	CCDS57965	CCDS72687																			,	FANCA_interact,35,139,UBZ_FAAP20,144,178,	,
protein-coding gene	Q8N0U7	-	HGNC28547	1	127795	127795	C1orf87	uc001czs.2	ENSG00000162598	ENSG00000162598	NM_152377	NM_152377	OTTHUMG00000008992	CCDS614	AK124828	C1orf87	uc001czr.1	ENSG00000162598	NM_152377	ENST00000486478	LOC127795	HIT000045934		MGC34837	CREF																						,	,	,
protein-coding gene	Q6P1W5	+	HGNC28250	1	84970	84970	C1orf94	uc001bxt.3	ENSG00000142698	ENSG00000142698	NM_001134734	NM_032884	OTTHUMG00000004012	CCDS381	AK123355	C1orf94	uc001bxs.4	ENSG00000142698	NM_032884	ENST00000373374	LOC84970	HIT000043228	RP_050706_03_B11	MGC15882			CCDS44108																				,	DUF4688,199,598,	,
protein-coding gene	Q69YW2	+	HGNC30491	1	375057	375057	C1orf95	uc031vpv.1	ENSG00000203685	ENSG00000203685	NM_001003665	NM_001003665	OTTHUMG00000037583	CCDS31044	AF035308	C1orf95	uc021pjw.1	ENSG00000203685	NM_001003665	ENST00000366789	LOC375057	HIT000025795		DKFZp761P211																							,	Spec3,44,127,	,
protein-coding gene	Q5SVJ3	+	HGNC30435	1	200159	200159	C1orf100	uc001iah.4	ENSG00000173728	ENSG00000173728	NM_001276348	NM_001012970	OTTHUMG00000040104	CCDS31079	BC054479	C1orf100	uc001iah.4	ENSG00000173728	NM_001012970	ENST00000308105	LOC200159		RP_050517_03_E10				CCDS60465																				,	,	,
protein-coding gene	Q5SY80	+	HGNC28491	1	257044	257044	C1orf101	uc001iam.3	ENSG00000179397	ENSG00000179397	NM_173807	NM_173807	OTTHUMG00000040103	CCDS1625	BC032859	C1orf101	uc001iak.1	ENSG00000179397	NM_001242340	ENST00000473875	LOC257044	HIT000010479		MGC33370	CCDS55693		CCDS44340																				,	CATSPERD,410,935,	,
protein-coding gene	O95561	+	HGNC29591	1	92346	92346	C1orf105	uc001gik.3	ENSG00000180999	ENSG00000180999	NM_139240	NM_139240	OTTHUMG00000034750	CCDS1301	AL035295	C1orf105	uc001gik.3	ENSG00000180999	NM_139240	ENST00000367727	LOC92346	HIT000052027					CCDS72983																				,	DUF4548,17,182,	,
protein-coding gene	Q3KP66	+	HGNC25599	1	55765	55765	C1orf106	uc001gvo.4	ENSG00000163362	ENSG00000163362	NM_018265	NM_018265	OTTHUMG00000035789	CCDS44292	AK001763	C1orf106	uc001gvo.4	ENSG00000163362	NM_018265	ENST00000367342	LOC55765	HIT000004237		FLJ10901																							,	DUF3338,87,216,	,
protein-coding gene	Q9NX04	-	HGNC26039	1	54955	54955	C1orf109	uc001cbp.3	ENSG00000116922	ENSG00000116922	XM_005270979	NM_017850	OTTHUMG00000004323	CCDS423	AK000515	C1orf109	uc010oig.2	ENSG00000116922	NM_017850	ENST00000358011	LOC54955	HIT000002990		FLJ20508																							,	CK2S,13,174,	,
protein-coding gene	Q86UF4	-	HGNC28736	1	339512	339512	C1orf110	uc001gck.2	ENSG00000185860	ENSG00000185860	NM_178550	NM_178550	OTTHUMG00000034421	CCDS44269	BC040018	C1orf110	uc001gck.2	ENSG00000185860	NM_178550	ENST00000367910	LOC339512	HIT000052302		MGC48998																							,	DUF4697,8,277,	,
protein-coding gene	Q5T0L3	-	HGNC27648	1	284680	284680	C1orf111	uc001gbx.2	ENSG00000171722	ENSG00000171722	NM_182581	NM_182581	OTTHUMG00000031375	CCDS1238	BC032957	C1orf111	uc001gbx.2	ENSG00000171722	NM_182581	ENST00000367935	LOC284680	HIT000041749	RP_050412_02_C05																								,	,	,
protein-coding gene	Q9NSG2	+	HGNC25565	1	55732	55732	C1orf112	uc001ggq.3	ENSG00000000460	ENSG00000000460	NM_018186	NM_018186	OTTHUMG00000035821	CCDS1285	AL354614	C1orf112	uc001ggo.3	ENSG00000000460	NM_018186	ENST00000472795	LOC55732	HIT000021348		FLJ10706																							,	DUF4487,176,728,	,
protein-coding gene	Q9H7X2	+	HGNC25873	1	79762	79762	C1orf115	uc001hmp.1	ENSG00000162817	ENSG00000162817	NM_024709	NM_024709	OTTHUMG00000037361	CCDS1524	AK024208	C1orf115	uc001hmp.1	ENSG00000162817	NM_024709	ENST00000294889	LOC79762	HIT000045276		FLJ14146																							,	DUF4710,63,135,	,
protein-coding gene	Q9BW04	-	HGNC28667	1	79098	79098	C1orf116	uc001hfd.2	ENSG00000182795	ENSG00000182795	NM_023938	NM_024115	OTTHUMG00000036580	CCDS1475	SARG	C1orf116	uc021pii.1					HIT000027852		FLJ36507	MGC2742	MGC4309	CCDS44306																				,	SARG,33,601,	,
protein-coding gene	Q6ZSJ8	+	HGNC24789	1	127687	127687	C1orf122	uc031txq.1	ENSG00000197982	ENSG00000197982	NM_198446	NM_198446	OTTHUMG00000004319	CCDS427	AK127381	C1orf122	uc001ccd.2	ENSG00000197982	NM_198446	ENST00000373043	LOC127687	HIT000047254		FLJ45459			CCDS44112																				,	DUF4726,10,110,	,
protein-coding gene	Q9NWV4	-	HGNC26059	1	54987	54987	C1orf123	uc001cvd.3	ENSG00000162384	ENSG00000162384	NM_001304759	NM_017887	OTTHUMG00000008940	CCDS576	BC010908	C1orf123	uc001cvd.3	ENSG00000162384	NM_017887	ENST00000294360	LOC54987	HIT000035112	RP_040825_02_G01	FLJ20580																							,	DUF866,4,158,	,
protein-coding gene	Q8N9H9	-	HGNC26730	1	148345	148345	C1orf127	uc010oao.2	ENSG00000175262	ENSG00000175262	NM_001170754	NM_173507	OTTHUMG00000002032	CCDS53267	AK094437	C1orf127	uc001ars.2	ENSG00000175262	NM_001170754	ENST00000377004	LOC148345	HIT000019292		FLJ37118																							,	DUF4556,2,198,	,
protein-coding gene	Q8NDD1	-	HGNC25332	1	128061	128061	C1orf131	uc001hul.3	ENSG00000143633	ENSG00000143633	XM_005273051	NM_152379	OTTHUMG00000038023	CCDS1591	BC062353	C1orf131	uc001hul.3	ENSG00000143633	NM_152379	ENST00000366651	LOC128061	HIT000051818	RP_041122_01_A05	DKFZp547B1713			CCDS73049																				,	DUF4602,114,256,	,
protein-coding gene	Q5TEV5	-	HGNC32021	1	574037	574037	C1orf134								AL109627																																,	,	,
protein-coding gene	Q5JVX7	-	HGNC32044	1	400757	400757	C1orf141	uc001ddm.2	ENSG00000203963	ENSG00000203963	NM_001276351	NM_001013674	OTTHUMG00000009406	CCDS30745	BC090886	C1orf141	uc031pmv.1	ENSG00000203963	NM_001276352	ENST00000371007	LOC400757		RP_051005_04_B12				CCDS72804																				,	DUF4545,1,116,DUF4545,110,391,	,
protein-coding gene	Q5VVC0	+	HGNC24032	1	388649	388649	C1orf146	uc001doq.3	ENSG00000203910	ENSG00000203910	NM_001012425	NM_001012425	OTTHUMG00000010285	CCDS30772		C1orf146	uc001doq.3	ENSG00000203910	NM_001012425	ENST00000370375	LOC388649		RP_051012_02_G04																								,	DUF4580,9,170,	,
protein-coding gene	Q8N1D5	+	HGNC28567	1	93190	93190	C1orf158	uc001auh.3	ENSG00000157330	ENSG00000157330	NM_152290	NM_152290	OTTHUMG00000001888	CCDS147	BX647383	C1orf158	uc010obe.1	ENSG00000157330	NM_152290	ENST00000288048	LOC93190	HIT000040914	RP_051012_02_D07	MGC35194																							,	,	,
protein-coding gene	Q96HA4	-	HGNC26062	1	54991	54991	C1orf159	uc001acu.2	ENSG00000131591	ENSG00000131591	NM_017891	NM_017891	OTTHUMG00000000745	CCDS7	AK128434	C1orf159	uc001acn.2	ENSG00000131591	NM_017891	ENST00000379320	LOC54991	HIT000013982		FLJ20584																							,	DUF4501,59,210,DUF4501,342,380,	,
protein-coding gene	Q8NEQ5	+	HGNC28344	1	128346	128346	C1orf162	uc001ebe.3	ENSG00000143110	ENSG00000143110	XM_005270475	NM_174896	OTTHUMG00000011750	CCDS837	BC017973	C1orf162	uc001ebe.3	ENSG00000143110	NM_174896	ENST00000343534	LOC128346	HIT000050693	RP_050706_02_H01	MGC24133			CCDS72837																				,	,	,
protein-coding gene	Q5SNV9	+	HGNC25262	1	284498	284498	C1orf167	uc001asy.1	ENSG00000215910	ENSG00000215910	XM_006710065		OTTHUMG00000002228		AL834308	C1orf167	uc001asz.3	ENSG00000215910		ENST00000433342		HIT000029038		DKFZp434E1410	RP11-56N19.2																						,	DUF4684,978,1437,	,
protein-coding gene	Q5VWT5	-	HGNC27295	1	199920	199920	C1orf168	uc001cym.4	ENSG00000187889	ENSG00000187889	NM_001004303	NM_001004303	OTTHUMG00000008281	CCDS30729	BX648439	C1orf168	uc001cym.4	ENSG00000187889	NM_001004303	ENST00000343433	LOC199920	HIT000057086		RP4-758N20.2	FLJ43208																						,	hSH3,653,725,	,
protein-coding gene	Q8IYL3	-	HGNC27915	1	339448	339448	C1orf174	uc001alf.3	ENSG00000198912	ENSG00000198912	NM_207356	NM_207356	OTTHUMG00000003739	CCDS53	BC035643	C1orf174	uc001alf.3	ENSG00000198912	NM_207356	ENST00000474140	LOC339448	HIT000044965	RP_050316_02_G02	RP13-531C17.2																							,	UPF0688,6,237,	,
protein-coding gene	Q3ZCV2	+	HGNC26854	1	163747	163747	C1orf177	uc001cyb.4	ENSG00000162398	ENSG00000162398	NM_152607	NM_152607	OTTHUMG00000009986	CCDS599	AK097520	C1orf177	uc001cya.4	ENSG00000162398	NM_152607	ENST00000358193	LOC163747	HIT000022374	RP_050317_01_B12	FLJ40201			CCDS44153																				,	,	,
protein-coding gene	Q5T7R7	+	HGNC28096	1	284546	284546	C1orf185	uc001csh.3	ENSG00000204006	ENSG00000204006	NM_001136508	NM_001136508	OTTHUMG00000008084	CCDS44142	AK130995	C1orf185	uc001csh.3	ENSG00000204006	NM_001136508	ENST00000371759	LOC284546	HIT000050266	RP_060606_01_E10	FLJ27485																							,	DUF4718,6,189,	,
protein-coding gene	Q6ZWK4	-	HGNC25341	1	440712	440712	C1orf186	uc001hdt.2	ENSG00000263961	ENSG00000263961	XM_005272738	NM_001007544	OTTHUMG00000184376	CCDS73014	AK122631	C1orf186	uc001hdt.2	ENSG00000196533	NM_001007544	ENST00000331555	LOC440712	HIT000042504		FLJ16052																							,	DUF4692,7,172,	,
protein-coding gene	Q5VU69	-	HGNC32305	1	388701	388701	C1orf189	uc001fee.2	ENSG00000163263	ENSG00000163263	NM_001010979	NM_001010979	OTTHUMG00000035982	CCDS30876		C1orf189	uc001fee.2	ENSG00000163263	NM_001010979	ENST00000368525	LOC388701																										,	DUF4558,15,100,	,
protein-coding gene	Q5T5A4	-	HGNC32331	1	127003	127003	C1orf194	uc009wew.3	ENSG00000179902	ENSG00000179902	NM_001122961	NM_001122961	OTTHUMG00000011735	CCDS41364		C1orf194	uc009wev.3	ENSG00000179902	NM_001122961	ENST00000369948	LOC127003		RP_050412_02_C03																								,	DUF3695,29,127,	,
protein-coding gene	Q9H425	-	HGNC25900	1	84886	84886	C1orf198	uc001hub.3	ENSG00000119280	ENSG00000119280	NM_032800	NM_032800	OTTHUMG00000037790	CCDS1587	BC066649	C1orf198	uc009xfh.2	ENSG00000119280	NM_001136495	ENST00000470540	LOC84886	HIT000026690		FLJ14525	MGC10710	FLJ16283	CCDS44330	DKFZp667D152	FLJ38847	CCDS44331																	,	DUF4706,31,134,	,
protein-coding gene	Q5VU13	-	HGNC27647	1	284677	284677	C1orf204		ENSG00000188004	ENSG00000188004	NM_001134233	NM_001134233	OTTHUMG00000035430	CCDS44253	AK096506	C1orf204	uc001fug.1	ENSG00000188004	NM_001134233	ENST00000368102	LOC284677	HIT000021361		FLJ39187																							,	V-set,27,143,V-set,154,257,	,
protein-coding gene	Q8IVY1	-	HGNC28755	1	149466	149466	C1orf210	uc001cit.4	ENSG00000253313	ENSG00000253313	NM_182517	NM_182517	OTTHUMG00000007289	CCDS481	BC041633	C1orf210	uc001cit.4	ENSG00000253313	NM_182517	ENST00000523677	LOC149466	HIT000052581	RP_050623_01_E07	MGC52423																							,	LRR19-TM,17,101,	,
protein-coding gene	Q8TAB5	-	HGNC26800	1	127703	127703	C1orf216	uc001bzh.1	ENSG00000142686	ENSG00000142686	NM_152374	NM_152374	OTTHUMG00000004167	CCDS395	AK096303	C1orf216	uc021oli.1							FLJ38984																							,	DUF4653,1,228,	,
protein-coding gene	Q5T0J3	+	HGNC33805	1	400798	400798	C1orf220	uc001glx.1	ENSG00000213057	ENSG00000213057	NR_033186	NR_033186	OTTHUMG00000035078		FLJ35530																																,	,	,
protein-coding gene	A1L170	+	HGNC34351	1	400793	400793	C1orf226	uc010pkt.1	ENSG00000239887	ENSG00000239887	NM_001085375	NM_001085375	OTTHUMG00000031376	CCDS44268	AI480219	C1orf226	uc010pkt.1	ENSG00000239887	NM_001135240	ENST00000458626	LOC400793	HIT000044995		AK023199	AK125122	AL512785	CCDS53422	BC127743	FLJ13137																		,	DUF4628,1,272,	,
protein-coding gene	Q6PIY5	+	HGNC34345	1	339541	339541	C1orf228	uc001cmf.2	ENSG00000198520	ENSG00000198520	NM_001145636	NM_001145636	OTTHUMG00000007834	CCDS53311	AL122004	C1orf228	uc001cmf.2	ENSG00000198520	NM_001145636	ENST00000535358	LOC339541		RP_050602_03_D10	AY254217	BC026115	NCRNA00082		MGC33556	p40																		,	,	,
protein-coding gene	F2Z333	-	HGNC42951	1	643988	643988	C1orf233	uc021oes.1	ENSG00000228594	ENSG00000228594	NM_001242659	NM_001242659	OTTHUMG00000154864	CCDS55559		C1orf233	uc021oes.1	ENSG00000228594	NM_001242659	ENST00000422725	LOC643988																										,	,	,
protein-coding gene	H3BTG2	-	HGNC44651	1	729059	729059	C1orf234		ENSG00000227868	ENSG00000227868	NM_001242521		OTTHUMG00000003226	CCDS57978		LOC729059	uc001bgh.1	ENSG00000227868	NM_001242521	ENST00000566855	LOC729059		RP_050316_02_D06																								,	,	,
protein-coding gene	P02745	+	HGNC1241	1	712	712	C1QA	uc001bfy.3	ENSG00000173372	ENSG00000173372	NM_015991	NM_015991	OTTHUMG00000002893	CCDS226	AF135157	C1QA	uc001bfy.3	ENSG00000173372	NM_015991	ENST00000374642	LOC712	HIT000040965	RP_041129_01_C02																								2.60.120.40,112,245,	Collagen,59,112,C1q,116,241,	2.60.120.40,112,245,
protein-coding gene	P02746	+	HGNC1242	1	713	713	C1QB	uc001bgd.3	ENSG00000173369	ENSG00000173369	XM_005245982	NM_000491	OTTHUMG00000002896	CCDS228	X03084	C1QB	uc001bgd.3	ENSG00000173369	NM_000491	ENST00000314933	LOC713	HIT000034124																									2.60.120.40,118,253,	Collagen,30,86,Collagen,60,120,C1q,123,247,	2.60.120.40,118,253,
protein-coding gene	P02747	+	HGNC1245	1	714	714	C1QC	uc001bga.4	ENSG00000159189	ENSG00000159189	NM_001114101	NM_172369	OTTHUMG00000002891	CCDS227	AK057792	C1QC	uc001bgc.4	ENSG00000159189	NM_172369	ENST00000374640	LOC714	HIT000014399	RP_050614_02_D02	C1QG																							2.60.120.40,115,245,	Collagen,61,117,C1q,121,242,	2.60.120.40,115,245,
protein-coding gene	B7Z1M9	-	HGNC37210	1	100191040	100191040	C2CD4D	uc010pdq.1	ENSG00000225556	ENSG00000225556	NM_001136003	NM_001136003	OTTHUMG00000167218	CCDS44224	BC171843	C2CD4D	uc021oyv.1							FAM148D																							,	C2,232,338,	,
protein-coding gene	P04003	+	HGNC1325	1	722	722	C4BPA	uc001hfo.3	ENSG00000123838	ENSG00000123838	XM_005273251		OTTHUMG00000036173	CCDS1477	M31452	C4BPA	uc001hfo.3	ENSG00000123838	NM_000715	ENST00000367070	LOC722	HIT000039462		C4BP																							2.10.70.10,49,172,	Sushi,50,108,Sushi,113,170,Sushi,175,234,Sushi,239,294,Sushi,299,364,Sushi,365,422,Sushi,426,480,Sushi,484,538,	2.10.70.10,49,172,
protein-coding gene	P20851	+	HGNC1328	1	725	725	C4BPB	uc001hfj.3	ENSG00000123843	ENSG00000123843	XM_005273255	NM_000716	OTTHUMG00000036035	CCDS1476	L11245	C4BPB	uc010pse.1	ENSG00000123843	NM_001017366	ENST00000451804	LOC725	HIT000032423		C4BP			CCDS31005																				,	Sushi,23,76,Sushi,81,134,Sushi,139,191,	,
protein-coding gene	P07357	+	HGNC1352	1	731	731	C8A	uc001cyo.2	ENSG00000157131	ENSG00000157131	NM_000562	NM_000562	OTTHUMG00000008306	CCDS606	M16974	C8A	uc001cyo.2	ENSG00000157131	NM_000562	ENST00000361249	LOC731																										,	Ldl_recept_a,94,130,MACPF,267,490,TSP_1,540,584,	,
protein-coding gene	P07358	-	HGNC1353	1	732	732	C8B	uc001cyp.4	ENSG00000021852	ENSG00000021852	NM_000066		OTTHUMG00000008305	CCDS30730	M16973	C8B	uc001cyp.3	ENSG00000021852	NM_000066	ENST00000371237	LOC732			CCDS60152			CCDS60151																				,	TSP_1,68,116,Ldl_recept_a,116,155,MACPF,273,496,TSP_1,546,591,	,
protein-coding gene	P23280	+	HGNC1380	1	765	765	CA6	uc031plc.1	ENSG00000131686	ENSG00000131686	NM_001215		OTTHUMG00000001763	CCDS30578	M57892	CA6	uc031plc.1	ENSG00000131686	NM_001270500	ENST00000377436	LOC765	HIT000042102	RP_060601_02_D12	CCDS57971			CCDS57970																				3.10.200.10,21,290,	Carb_anhydrase,24,275,	3.10.200.10,21,290,
protein-coding gene	Q9ULX7	+	HGNC1372	1	23632	23632	CA14	uc001etx.4	ENSG00000118298	ENSG00000118298	XM_005245059	NM_012113	OTTHUMG00000012549	CCDS947	AB025904	CA14	uc001etx.3	ENSG00000118298	NM_012113	ENST00000369111	LOC23632	HIT000042128	RP_050309_01_D05																								,	Carb_anhydrase,23,275,	,
protein-coding gene	Q5VU97	+	HGNC29314	1	57685	57685	CACHD1	uc001dbo.1	ENSG00000158966	ENSG00000158966	NM_020925	NM_020925	OTTHUMG00000009030	CCDS628	AB046793	CACHD1	uc001dbo.1	ENSG00000158966	NM_020925	ENST00000290039	LOC57685	HIT000001288	RP_050317_03_A12	VWCD1	KIAA1573																						,	VWA_N,89,204,VWA,228,412,Cache_1,453,529,Cache_1,772,857,	,
protein-coding gene	Q15878	+	HGNC1392	1	777	777	CACNA1E	uc009wxt.4	ENSG00000198216	ENSG00000198216	NM_001205293	NM_000721	OTTHUMG00000037301	CCDS53443	AK096563	CACNA1E	uc009wxr.3	ENSG00000198216	NM_001205294	ENST00000533229	LOC777			CACNL1A6	Cav2.3	BII	CCDS55664	CACH6	CCDS55665																		,	Ion_trans,88,362,Ion_trans,475,714,Ion_trans,1152,1433,Ion_trans,1477,1734,GPHH,1736,1805,Ca_chan_IQ,1806,1883,	,
protein-coding gene	Q13698	-	HGNC1397	1	779	779	CACNA1S	uc001gvv.3	ENSG00000081248	ENSG00000081248	NM_000069	NM_000069	OTTHUMG00000035784	CCDS1407	L33798	CACNA1S	uc001gvv.3	ENSG00000081248	NM_000069	ENST00000362061	LOC779		RP_050630_04_C11	HOKPP	MHS5	CACNL1A3		Cav1.1	hypoPP																		,	Ion_trans,50,345,Ion_trans,431,672,Ion_trans,798,1076,Ion_trans,1117,1392,GPHH,1394,1463,Ca_chan_IQ,1464,1538,	,
protein-coding gene	Q9HB71	+	HGNC30423	1	27101	27101	CACYBP	uc001gkj.1	ENSG00000116161	ENSG00000116161	XM_005245092	NM_014412	OTTHUMG00000034941	CCDS1315	BC022352	CACYBP	uc010pmw.2	ENSG00000116161	NM_014412	ENST00000483307	LOC27101	HIT000032566		SIP	S100A6BP		CCDS30942																				2.60.40.790,63,176,	Siah-Interact_N,2,75,CS,76,156,SGS,161,221,	2.60.40.790,63,176,
protein-coding gene	Q8N126	+	HGNC17601	1	57863	57863	CADM3	uc001ftk.2	ENSG00000162706	ENSG00000162706	NM_021189	NM_021189	OTTHUMG00000037177	CCDS1182	AY046418	CADM3	uc009wsx.1	ENSG00000162706	NM_021189	ENST00000368124	LOC57863	HIT000041977		IGSF4B	BIgR	FLJ10698	CCDS44251	TSLL1	NECL1	SynCAM3	Necl-1																2.60.40.10,25,135,	I-set,31,126,C2-set_2,133,220,Ig_2,234,317,	2.60.40.10,25,135,
protein-coding gene	Q8TD86	+	HGNC24193	1	163688	163688	CALML6	uc001aih.1	ENSG00000169885	ENSG00000169885	NM_138705	NM_138705	OTTHUMG00000000943	CCDS30566	AF490905	CALML6	uc001aih.1	ENSG00000169885	NM_138705	ENST00000307786	LOC163688			CAGLP																							,	EF-hand_8,49,99,EF-hand_7,111,172,	,
protein-coding gene	Q96NX5	+	HGNC14585	1	57172	57172	CAMK1G	uc001hhd.3	ENSG00000008118	ENSG00000008118	NM_020439	NM_020439	OTTHUMG00000036361	CCDS1486	VWS1	CAMK1G	uc001hhf.4	ENSG00000008118	NM_020439	ENST00000009105	LOC57172	HIT000020568		CLICKIII	dJ272L16.1																						,	Pkinase,23,277,	,
protein-coding gene	Q7Z7J9	-	HGNC24190	1	55450	55450	CAMK2N1	uc001bdh.3	ENSG00000162545	ENSG00000162545	NM_018584	NM_018584	OTTHUMG00000002837	CCDS207	AY204901	CAMK2N1	uc001bdh.3	ENSG00000162545	NM_018584	ENST00000375078	LOC55450			CaMKIINalpha																							,	CaM-KIIN,1,78,	,
protein-coding gene	Q08AD1	+	HGNC29188	1	23271	23271	CAMSAP2	uc001gvk.3	ENSG00000118200	ENSG00000118200	XM_005245040	NM_203459	OTTHUMG00000035740	CCDS1404	AB029001	CAMSAP2	uc001gvk.3	ENSG00000118200	NM_203459	ENST00000358823	LOC23271	HIT000000795	RP_050630_04_C12	CAMSAP1L1	KIAA1078	CCDS72999	CCDS72998																				,	CAMSAP_CH,233,316,CAMSAP_CC1,749,804,CAMSAP_CKK,1350,1468,	,
protein-coding gene	Q9Y6Y1	+	HGNC18806	1	23261	23261	CAMTA1	uc001aoi.3	ENSG00000171735	ENSG00000171735	NM_001195563	NM_015215	OTTHUMG00000001212	CCDS30576	AB020640	CAMTA1	uc001aoh.3	ENSG00000171735	NM_001195563	ENST00000473578	LOC23261	HIT000000550		KIAA0833	CCDS55575		CCDS55574																				2.60.40.10,872,953,	CG-1,69,182,TIG,872,952,IQ,1594,1609,	2.60.40.10,872,953,
protein-coding gene	Q01518	+	HGNC20040	1	10487	10487	CAP1	uc001cey.4	ENSG00000131236	ENSG00000131236	NM_006367	NM_006367	OTTHUMG00000004493	CCDS41309	L12168	CAP1	uc001cfa.4	ENSG00000131236	NM_006367	ENST00000372797	LOC10487	HIT000021048		CAP																							2.160.20.70,319,475,	CAP_N,5,296,CAP_C,318,473,	2.160.20.70,319,475,
protein-coding gene	P17655	+	HGNC1479	1	824	824	CAPN2	uc001hob.4	ENSG00000162909	ENSG00000162909	NM_001748	NM_001748	OTTHUMG00000037376	CCDS31035	J04700	CAPN2	uc010puy.2	ENSG00000162909	NM_001146068	ENST00000433674	LOC824	HIT000039201	RP_050426_01_E10	mCANP	CANPml	CANPL2	CCDS53478																				1.10.238.10,2,700,2.60.120.380,2,700,3.90.70.10,2,700,	Peptidase_C2,46,342,Calpain_III,356,507,EF-hand_8,544,603,	1.10.238.10,2,700,2.60.120.380,2,700,3.90.70.10,2,700,
protein-coding gene	A6NHC0	-	HGNC1485	1	388743	388743	CAPN8	uc031vow.1	ENSG00000203697	ENSG00000203697	NM_001143962	NM_001143962	OTTHUMG00000037378	CCDS73038	nCL-2	CAPN8	uc009xee.2	ENSG00000203697	NM_001143962	ENST00000366872	LOC388743																										,	Peptidase_C2,46,342,Calpain_III,356,509,	,
protein-coding gene	O14815	+	HGNC1486	1	10753	10753	CAPN9	uc001htz.1	ENSG00000135773	ENSG00000135773	XM_005273010	NM_006615	OTTHUMG00000037779	CCDS1586	AF022799	CAPN9	uc001htz.1	ENSG00000135773	NM_006615	ENST00000354537	LOC10753		RP_050210_01_B12	nCL-4	GC36		CCDS31053																				3.90.70.10,10,347,	Peptidase_C2,43,335,Calpain_III,349,491,	3.90.70.10,10,347,
protein-coding gene	P52907	+	HGNC1488	1	829	829	CAPZA1	uc001ecj.1	ENSG00000116489	ENSG00000116489	NM_006135	NM_006135	OTTHUMG00000011769	CCDS30805	U56637	CAPZA1	uc001ecj.1	ENSG00000116489	NM_006135	ENST00000263168	LOC829	HIT000057385																									,	F-actin_cap_A,14,282,	,
protein-coding gene	P47756	-	HGNC1491	1	832	832	CAPZB	uc010ocz.2	ENSG00000077549	ENSG00000077549	NM_004930		OTTHUMG00000002556	CCDS41277	U03271	CAPZB	uc010ocz.2	ENSG00000077549	NM_004930	ENST00000401084	LOC832	HIT000044958	RP_050712_04_C05	CCDS72717	CCDS72718		CCDS55579																				,	F_actin_cap_B,6,240,	,
protein-coding gene	P55211	-	HGNC1511	1	842	842	CASP9	uc001awn.4	ENSG00000132906	ENSG00000132906	NM_001229	NM_032996	OTTHUMG00000002256	CCDS158	U60521	CASP9	uc001awm.2	ENSG00000132906	NM_001229	ENST00000546424	LOC842	HIT000032849	RP_Baylor_102656	MCH6	ICE-LAP6	APAF-3	CCDS159	PPP1R56	CCDS159	CCDS59995																	3.40.50.1460,139,416,	CARD,6,92,Peptidase_C14,161,413,	3.40.50.1460,139,416,
protein-coding gene	P31415	+	HGNC1512	1	844	844	CASQ1	uc010pja.2	ENSG00000143318	ENSG00000143318	NM_001231	NM_001231	OTTHUMG00000031607	CCDS1198	S73775	CASQ1	uc010pja.2	ENSG00000143318	NM_001231	ENST00000368079	LOC844	HIT000039451	RP_NM_009813	CASQ	PDIB1		CCDS1198																				,	Calsequestrin,11,396,	,
protein-coding gene	O14958	-	HGNC1513	1	845	845	CASQ2	uc001efx.4	ENSG00000118729	ENSG00000118729	NM_001232	NM_001232	OTTHUMG00000011970	CCDS884	BC022288	CASQ2	uc001efx.4	ENSG00000118729	NM_001232	ENST00000261448	LOC845	HIT000049162	RP_050426_01_F12	PDIB2																							,	Calsequestrin,2,382,	,
protein-coding gene	Q86V15	-	HGNC26002	1	54897	54897	CASZ1	uc001aro.5	ENSG00000130940	ENSG00000130940	NM_001079843	NM_017766	OTTHUMG00000002035	CCDS120	AK000328	CASZ1	uc001arq.1	ENSG00000130940	NM_017766	ENST00000492173	LOC54897	HIT000005559		FLJ20321	ZNF693	castor	CCDS41246	cst	SRG																		,	,	,
protein-coding gene	Q7RTX7	+	HGNC23220	1	378807	378807	CATSPER4	uc010oez.2	ENSG00000188782	ENSG00000188782	NM_198137	NM_198137	OTTHUMG00000003383	CCDS30645	BN000273	CATSPER4	uc010oey.1	ENSG00000188782	NM_198137	ENST00000338855	LOC378807		RP_050331_01_F03																								,	Ion_trans,91,318,	,
protein-coding gene	Q5T0F9	-	HGNC29386	1	200014	200014	CC2D1B	uc001ctq.2	ENSG00000154222	ENSG00000154222	NM_032449	NM_032449	OTTHUMG00000008102	CCDS30714	AB058739	CC2D1B	uc001ctr.3	ENSG00000154222	NM_032449	ENST00000284376	LOC200014	HIT000001551	RP_050419_03_B11	KIAA1836																							,	C2,699,817,	,
protein-coding gene	Q6YP21	-	HGNC33238	1	56267	56267	CCBL2	uc001dmp.2	ENSG00000137944	ENSG00000137944	NM_001008662	NM_001008661	OTTHUMG00000010617	CCDS30766	AF091090	CCBL2	uc001dmp.2	ENSG00000137944	NM_001008661	ENST00000260508	LOC56267	HIT000013790	RP_050421_03_D12	RBM1	RP11-82K18.3	KAT3	CCDS30767																				,	Aminotran_1_2,63,446,	,
protein-coding gene	Q96LX7	-	HGNC26574	1	149483	149483	CCDC17	uc010olt.2	ENSG00000159588	ENSG00000159588	NM_001190182	NM_152500	OTTHUMG00000007822	CCDS44131	FLJ33084	CCDC17	uc010ols.2	ENSG00000159588	NM_001190182	ENST00000421127	LOC149483	HIT000014256		CCDS53314			CCDS44131																				,	,	,
protein-coding gene	Q5T9S5	+	HGNC30370	1	343099	343099	CCDC18	uc021opx.1	ENSG00000122483	ENSG00000122483	XM_006710609	NM_206886	OTTHUMG00000010598		NY-SAR-41	CCDC18	uc009wdl.1	ENSG00000122483	NM_206886	ENST00000338949	LOC343099	HIT000045918																									,	,	,
protein-coding gene	Q8N300	-	HGNC29204	1	374969	374969	CCDC23	uc001cib.2	ENSG00000177868	ENSG00000177868	NM_199342	NM_199342	OTTHUMG00000007566	CCDS474	AL512353	CCDC23	uc001cib.2	ENSG00000177868	NM_199342	ENST00000372521	LOC374969	HIT000040754	RP_040907_01_G01	CAH72714	MGC45441																						,	CCDC23,4,66,	,
protein-coding gene	Q8N4L8	+	HGNC28688	1	149473	149473	CCDC24	uc001clj.3	ENSG00000159214	ENSG00000159214	XM_005270524	NM_152499	OTTHUMG00000008299	CCDS507	MGC45441	CCDC24	uc001clj.3	ENSG00000159214	NM_152499	ENST00000372318	LOC149473	HIT000042005																									,	CCDC24,21,206,	,
[truncated: 18,749 more rows]
[truncated: 7 more columns]
